# Supplementary material for: Genetic structure and demographic history of Northern Han people in Liaoning Province inferred from genome-wide array data
Source: Frontiers journal article supplement (doi:10.3389/fevo.2022.1014024), 2022-11-03
Supplement: Table_1.XLSX [file Table_1.XLSX]

## Sheet: Sheet1
Supplementary Table 1. The sample information
Group	Individual ID	Gender	Status	Language Affiliation
Han_Dalian	1ST22010100001	male	Unrelated Healthy	Sinitic
Han_Dalian	1ST22010100002	male	Unrelated Healthy	Sinitic
Han_Dalian	1ST22010100003	male	Unrelated Healthy	Sinitic
Han_Dalian	1ST22010100004	female	Unrelated Healthy	Sinitic
Han_Dalian	1ST22010100005	male	Unrelated Healthy	Sinitic
Han_Dalian	1ST22010100006	female	Unrelated Healthy	Sinitic
Han_Dalian	1ST22010100007	male	Unrelated Healthy	Sinitic
Han_Dalian	1ST22010100008	female	Unrelated Healthy	Sinitic
Han_Dalian	1ST22010100009	female	Unrelated Healthy	Sinitic
Han_Dalian	1ST22010100010	female	Unrelated Healthy	Sinitic
Han_Dalian	1ST22010100011	female	Unrelated Healthy	Sinitic
Han_Dalian	1ST22010100012	female	Unrelated Healthy	Sinitic
Han_Dalian	1ST22010100013	male	Unrelated Healthy	Sinitic
Han_Dalian	1ST22010100014	female	Unrelated Healthy	Sinitic
Han_Dalian	1ST22010100015	female	Unrelated Healthy	Sinitic
Han_Dalian	1ST22010100016	male	Unrelated Healthy	Sinitic
Han_Dalian	1ST22010100017	male	Unrelated Healthy	Sinitic
Han_Dalian	1ST22010100018	male	Unrelated Healthy	Sinitic
Han_Dalian	1ST22010100019	male	Unrelated Healthy	Sinitic
Han_Dalian	1ST22010100020	female	Unrelated Healthy	Sinitic
Han_Dalian	1ST22010100021	male	Unrelated Healthy	Sinitic
Han_Dandong	1ST22010100022	male	Unrelated Healthy	Sinitic
Han_Dandong	1ST22010100023	male	Unrelated Healthy	Sinitic
Han_Dandong	1ST22010100024	male	Unrelated Healthy	Sinitic
Han_Dandong	1ST22010100025	male	Unrelated Healthy	Sinitic
Han_Dandong	1ST22010100026	male	Unrelated Healthy	Sinitic
Han_Dandong	1ST22010100027	male	Unrelated Healthy	Sinitic
Han_Dandong	1ST22010100028	male	Unrelated Healthy	Sinitic
Han_Dandong	1ST22010100029	female	Unrelated Healthy	Sinitic
Han_Dandong	1ST22010100030	male	Unrelated Healthy	Sinitic
Han_Dandong	1ST22010100031	male	Unrelated Healthy	Sinitic
Han_Dandong	1ST22010100032	male	Unrelated Healthy	Sinitic
Han_Dandong	1ST22010100033	female	Unrelated Healthy	Sinitic
Han_Dandong	1ST22010100034	female	Unrelated Healthy	Sinitic
Han_Dandong	1ST22010100035	female	Unrelated Healthy	Sinitic
Han_Dandong	1ST22010100036	female	Unrelated Healthy	Sinitic
Han_Dandong	1ST22010100037	female	Unrelated Healthy	Sinitic
Han_Dandong	1ST22010100038	female	Unrelated Healthy	Sinitic
Han_Dandong	1ST22010100039	female	Unrelated Healthy	Sinitic
Han_Dandong	1ST22010100040	female	Unrelated Healthy	Sinitic
Han_Dandong	1ST22010100041	female	Unrelated Healthy	Sinitic
Han_Shenyang	1ST22010100042	male	Unrelated Healthy	Sinitic
Han_Shenyang	1ST22010100043	male	Unrelated Healthy	Sinitic
Han_Shenyang	1ST22010100044	male	Unrelated Healthy	Sinitic
Han_Shenyang	1ST22010100045	male	Unrelated Healthy	Sinitic
Han_Shenyang	1ST22010100047	male	Unrelated Healthy	Sinitic
Han_Shenyang	1ST22010100048	male	Unrelated Healthy	Sinitic
Han_Shenyang	1ST22010100049	male	Unrelated Healthy	Sinitic
Han_Shenyang	1ST22010100050	male	Unrelated Healthy	Sinitic
Han_Shenyang	1ST22010100051	male	Unrelated Healthy	Sinitic
Han_Shenyang	1ST22010100052	female	Unrelated Healthy	Sinitic
Han_Shenyang	1ST22010100053	female	Unrelated Healthy	Sinitic
Han_Shenyang	1ST22010100054	female	Unrelated Healthy	Sinitic
Han_Shenyang	1ST22010100055	female	Unrelated Healthy	Sinitic
Han_Shenyang	1ST22010100056	female	Unrelated Healthy	Sinitic
Han_Shenyang	1ST22010100057	female	Unrelated Healthy	Sinitic
Han_Shenyang	1ST22010100058	female	Unrelated Healthy	Sinitic
Han_Shenyang	1ST22010100059	female	Unrelated Healthy	Sinitic
Han_Shenyang	1ST22010100060	female	Unrelated Healthy	Sinitic
Han_Shenyang	1ST22010100061	female	Unrelated Healthy	Sinitic
Han_Panjin	1ST22010100066	female	Unrelated Healthy	Sinitic
Han_Panjin	1ST22010100067	female	Unrelated Healthy	Sinitic
Han_Panjin	1ST22010100068	female	Unrelated Healthy	Sinitic
Han_Panjin	1ST22010100069	male	Unrelated Healthy	Sinitic
Han_Panjin	1ST22010100070	female	Unrelated Healthy	Sinitic
Han_Panjin	1ST22010100071	female	Unrelated Healthy	Sinitic
Han_Panjin	1ST22010100072	male	Unrelated Healthy	Sinitic
Han_Panjin	1ST22010100073	male	Unrelated Healthy	Sinitic
Han_Panjin	1ST22010100074	male	Unrelated Healthy	Sinitic
Han_Panjin	1ST22010100075	male	Unrelated Healthy	Sinitic
Han_Panjin	1ST22010100076	female	Unrelated Healthy	Sinitic
Han_Panjin	1ST22010100077	female	Unrelated Healthy	Sinitic
Han_Panjin	1ST22010100078	male	Unrelated Healthy	Sinitic
Han_Panjin	1ST22010100079	female	Unrelated Healthy	Sinitic
Han_Panjin	1ST22010100080	male	Unrelated Healthy	Sinitic
Han_Panjin	1ST22010100081	male	Unrelated Healthy	Sinitic
Han_Panjin	1ST22010100082	male	Unrelated Healthy	Sinitic
Han_Panjin	1ST22010100083	male	Unrelated Healthy	Sinitic
Han_Panjin	1ST22010100084	female	Unrelated Healthy	Sinitic
Han_Panjin	1ST22010100085	female	Unrelated Healthy	Sinitic
