# Supplementary material for: Genetic structure and demographic history of Northern Han people in Liaoning Province inferred from genome-wide array data
Source: Frontiers journal article supplement (doi:10.3389/fevo.2022.1014024), 2022-11-03
Supplement: Table_2.XLSX [file Table_2.XLSX]

## Sheet: Sheet1
Supplementary Table 2. genetic relationship matrix (GRM) between each pair of newly collect individuals.
	1ST22010100038	1ST22010100048	1ST22010100033	1ST22010100071	1ST22010100006	1ST22010100067	1ST22010100003	1ST22010100056	1ST22010100060	1ST22010100009	1ST22010100051	1ST22010100014	1ST22010100010	1ST22010100061	1ST22010100016	1ST22010100012	1ST22010100074	1ST22010100044	1ST22010100004	1ST22010100032	1ST22010100077	1ST22010100031	1ST22010100007	1ST22010100013	1ST22010100037	1ST22010100069	1ST22010100027	1ST22010100075	1ST22010100053	1ST22010100018	1ST22010100072	1ST22010100030	1ST22010100034	1ST22010100054	1ST22010100050	1ST22010100002	1ST22010100043	1ST22010100083	1ST22010100035	1ST22010100041	1ST22010100019	1ST22010100023	1ST22010100081	1ST22010100029	1ST22010100057	1ST22010100021	1ST22010100080	1ST22010100079	1ST22010100036
1ST22010100038	1.00287
1ST22010100048	-0.00611045	0.993826
1ST22010100033	-0.0130553	-0.00931569	1.00552
1ST22010100071	-0.0144254	-0.00873006	-0.00610367	1.00091
1ST22010100006	-0.0177045	-0.0214127	-0.00765052	-0.00535659	0.995384
1ST22010100067	-0.0117652	-0.00674837	-0.00619747	-0.0122933	-0.0144868	1.0045
1ST22010100003	-0.00709901	-0.0160998	-0.0164669	-0.0148435	-0.015632	-0.0228082	0.987419
1ST22010100056	-0.013142	-0.012372	-0.00640082	-0.00781086	-0.0143628	-0.0120237	-0.0137517	0.986844
1ST22010100060	-0.0119064	-0.0141298	-0.0113278	-0.0110615	-0.0153065	-0.0144681	-0.0128274	-0.0058586	0.986865
1ST22010100009	-0.0169826	-0.0138576	-0.0197088	-0.015539	-0.00564667	-0.019233	-0.00735046	-0.00451672	-0.0109604	0.98642
1ST22010100051	-0.00971933	-0.0119508	-0.0144892	-0.0107823	-0.012864	-0.0165199	-0.0118776	-0.0189823	-0.0122786	-0.00989094	0.994144
1ST22010100014	-0.0121165	-0.0166949	-0.0145874	-0.00577958	-0.00235322	-0.0211283	-0.00308312	-0.0134767	-0.00409074	-0.0130944	-0.0111716	0.996918
1ST22010100010	-0.022006	-0.0129979	-0.0128381	-0.0123403	-0.0120352	-0.0218138	-0.00536518	-0.0195664	-0.0269681	-0.015592	-0.00630912	-0.0164495	0.988753
1ST22010100061	-0.0138252	-0.0139732	-0.0131109	-0.00894909	-0.0152776	-0.0100727	-0.00474392	-0.0077934	-0.010118	-0.0116978	-0.00743609	-0.0106076	-0.010415	0.991673
1ST22010100016	-0.0122115	-0.0211085	-0.00895877	-0.0148471	-0.0144701	-0.0127776	-0.0121027	-0.0161421	-0.0219871	-0.0125827	-0.0148029	-0.00590461	0.000211121	-0.0126583	0.997325
1ST22010100012	-0.0172662	-0.0132632	-0.00237476	-0.0174831	-0.0156852	-0.00727921	-0.0113381	-0.0190974	-0.0119226	-0.020136	-0.00870582	-0.0162279	-0.0151572	-0.0130831	-0.00873136	0.990674
1ST22010100074	-0.0148022	-0.0144473	-0.0211925	-0.0229458	-0.0214114	-0.0084872	-0.0116041	-0.0111891	-0.00467698	-0.00740624	-0.00296887	-0.0164061	-0.0102185	-0.0130937	-0.00753656	-0.0108191	0.999569
1ST22010100044	-0.0065059	-0.0096394	-0.0142054	-0.00929315	-0.014991	-0.0106163	-0.0116098	-0.017094	-0.00757238	-0.0155782	-0.0102228	-0.00846903	-0.0164188	-0.0207947	-0.0110307	-0.0238206	-0.00947834	0.994545
1ST22010100004	-0.0188418	-0.0151821	-0.00420579	-0.0213337	-0.0136845	-0.0163505	-0.00972062	-0.0149414	-0.0138575	-0.0154452	-0.0110477	-0.0119203	-0.0211313	-0.021891	-0.00898183	-0.021197	-0.013616	-0.00888005	0.993031
1ST22010100032	-0.0129875	-0.00723632	-0.0135026	-0.0136194	-0.0187505	-0.00606585	-0.0180356	-0.0139645	-0.0121861	-0.0167434	-0.0151718	-0.0140007	-0.0172806	-0.0150069	-0.0217511	-0.00942756	-0.0177002	-0.00683349	-0.0168225	0.992439
1ST22010100077	-0.0183368	-0.00649482	-0.0142858	-0.0162387	-0.0112716	-0.005492	-0.0103412	-0.0188428	-0.0102472	-0.00851414	-0.0137518	-0.0139378	-0.0130028	-0.0108329	-0.0168187	-0.0129328	-0.0104129	-0.00970017	-0.0115868	-0.00817516	1.00108
1ST22010100031	-0.018665	-0.00912212	-0.00727802	-0.0172135	-0.0170601	-0.00890959	-0.0191949	-0.0139025	-0.0237149	-0.0115006	-0.00972152	-0.00636321	-0.0183602	-0.00404065	-0.014377	-0.0140514	-0.0108051	-0.00863946	-0.0150682	-0.010563	-0.000441859	0.988738
1ST22010100007	-0.00810513	-0.0128751	-0.0179998	-0.0130876	-0.0110023	-0.00307534	-0.01	-0.0111097	-0.0125962	-0.00851623	-0.0185994	-0.00349852	-0.0145934	-0.0110346	-0.0101872	-0.0211411	-0.00849118	-0.0104686	-0.0137522	-0.0137571	-0.00813027	-0.0145892	0.990109
1ST22010100013	-0.00865663	-0.0183359	-0.0160368	-0.0207676	-0.0177244	-0.0100609	-0.00929824	-0.0129225	-0.0131078	-0.00737541	-0.019518	-0.00241358	-0.0163104	-0.0104206	-0.0148178	-0.0167753	-0.0167859	-0.0128641	-0.00478833	-0.0108522	-0.0184606	-0.0245364	-0.00244143	1.00725
1ST22010100037	-0.0120468	-0.0102949	-0.0160263	-0.00915036	-0.0143852	-0.0161412	-0.0125607	-0.00619058	-0.0221257	-0.0177025	-0.0079327	-0.0119184	-0.00581869	-0.0152077	-0.0104808	-0.0173077	-0.0136143	-0.0185533	-0.00642228	-0.0128613	-0.0145306	-0.0133262	-0.0159216	-0.0216699	0.99978
1ST22010100069	-0.00794228	-0.0183001	-0.0220758	-0.0177862	-0.01705	-0.0182392	-0.0124076	-0.0163831	-0.0136866	-0.0130073	-0.0160976	-0.0112545	-0.00430059	-0.00711986	-0.0158996	-0.0167714	-0.0184823	-0.0187115	-0.00409792	-0.0152388	-0.015048	-0.0203735	-0.00580622	-0.00816979	-0.0143858	0.984209
1ST22010100027	-0.0181657	-0.00802401	-0.00847094	-0.0103041	-0.00465053	-0.0116112	-0.0163407	-0.00574774	-0.0137241	-0.01251	-0.0109543	-0.0144851	-0.00854497	-0.00987948	-0.0165598	-0.0154758	-0.011551	-0.0182142	-0.0106892	-0.0119555	-0.00730247	-0.0122846	-0.0188315	-0.0154157	-0.011813	-0.0145257	0.984994
1ST22010100075	-0.0123321	-0.010676	-0.0122884	-0.0127246	-0.0191967	-0.0153729	-0.0174281	-0.0153607	-0.0124727	-0.0179959	-0.0181405	-0.0159477	-0.00882616	-0.00546685	-0.00834741	-0.0158288	-0.00942936	-0.014496	-0.0139559	-0.0113426	-0.0168835	-0.0131725	-0.00918229	-0.0102127	-0.00942794	-0.0121008	-0.0171434	0.993772
1ST22010100053	-0.00805444	-0.0121458	-0.0234492	-0.0030985	-0.0132108	-0.0280503	-0.00765032	-0.0130387	-0.0084903	-0.0158176	-0.0149325	-0.0123804	-0.0132256	-0.0218882	-0.00545867	-0.0182007	-0.02344	-0.0100667	-0.0238714	-0.0146484	-0.0155194	-0.0144029	-0.00946268	-0.0228343	-0.0113128	-0.0118223	-0.00915374	-0.00897993	1.00194
1ST22010100018	-0.00972321	-0.01316	-0.0179735	-0.0116883	-0.0188788	-0.0139453	-0.0166392	-0.0129832	-0.0154117	-0.00791514	-0.0108538	-0.0167793	-0.0164909	-0.0157419	0.000727502	-0.0170436	-0.00793001	-0.0122064	-0.00790645	-0.0141619	-0.0129414	-0.00559837	-0.00694055	-0.0138383	-0.0171486	-0.0189114	-0.0120598	-0.00296937	-0.00668232	0.991718
1ST22010100072	-0.0168521	-0.0127134	-0.012402	-0.00970895	-0.0120301	-0.0121816	-0.0105648	-0.011882	-0.0103989	-0.0177422	-0.0116125	-0.0103377	-0.0134898	-0.0135072	-0.0212013	-0.0193749	-0.0189385	-0.0198542	-0.0149476	-0.00943654	-0.0158395	-0.0158326	-0.0210863	-0.013208	-0.00567789	-0.00605967	-0.00914656	-0.00217151	-0.0098199	-0.011345	0.985554
1ST22010100030	-0.0101668	-0.0164534	-0.00995541	-0.0100722	-0.00421118	-0.0134549	-0.0103533	-0.0129478	-0.0186092	-0.0208915	-0.0118481	-0.0148041	-0.0126797	-0.0207516	-0.00827346	-0.0191316	-0.015534	-0.00995182	-0.0103696	-0.00801173	-0.0125069	-0.00922699	-0.0214177	-0.00971574	-0.0103119	-0.0138229	-0.0144751	-0.0160654	-0.00532975	-0.0185095	-0.00557004	0.991884
1ST22010100034	-0.0159708	-0.00922969	-0.00409673	-0.0111106	-0.00904927	-0.0101986	-0.0147524	-0.0161575	-0.0176759	-0.0184095	-0.00399376	-0.017423	-0.0172544	-0.0109654	-0.00992649	-0.0103832	-0.0145927	-0.00833193	-0.0147288	-0.0208964	-0.0128268	-0.0127879	-0.0147288	-0.0118557	-0.0184709	-0.0132408	-0.0129271	-0.00931271	-0.0111657	-0.00418124	-0.0121883	-0.0115857	0.993583
1ST22010100054	-0.0110614	-0.0113451	-0.0144183	-0.0191492	-0.00631122	-0.0134076	-0.00826248	-0.0184485	-0.00769752	-0.0187288	-0.0130301	-0.0117154	-0.00476947	-0.012985	-0.0148757	-0.0176155	-0.0143611	-0.0124829	-0.0148964	-0.0136321	-0.00742251	-0.0162044	-0.0157825	-0.0196628	-0.0162596	-0.00565724	-0.0128392	-0.0128331	-0.0171926	-0.00647227	-0.0104401	-0.0035551	-0.0174775	0.995243
1ST22010100050	-0.00727493	-0.0141283	-0.00884372	-0.00686911	-0.0086714	-0.0168614	-0.0184856	-0.0149094	-0.0121492	-0.0167623	-0.0165877	-0.0135487	-0.00974797	-0.019568	-0.0138593	-0.015226	-0.0109818	-0.016248	-0.0144387	-0.0124081	-0.0145084	-0.0112365	-0.0181905	-0.0182312	-0.00837803	-0.0106278	-0.0175224	-0.0113217	-0.0182277	-0.0137178	-0.017031	-0.0114074	-0.0062272	-0.0186801	0.988672
1ST22010100002	-0.0202688	-0.0088978	-0.00425977	-0.0117127	-0.0116311	-0.0112158	-0.0113153	-0.01193	-0.00878654	-0.0111965	-0.0151809	-0.0120141	-0.0132505	-0.0143854	-0.0143044	-0.0164374	-0.00781076	-0.0166453	-0.00651797	-0.0176748	-0.0122554	-0.0150583	-0.0132873	-0.00563259	-0.00578177	-0.011488	-0.0113579	-0.0160215	-0.012135	-0.0128458	-0.0154486	-0.0181109	-0.0120367	-0.0172973	-0.0159375	0.991326
1ST22010100043	-0.012921	-0.0179943	-0.0101392	-0.0196756	-0.016377	-0.0134312	-0.0246585	-0.0126526	-0.0125905	-0.0122385	-0.00879094	-0.0141736	-0.00888015	-0.0227155	-0.0162643	-0.0278249	-0.012397	-0.00360579	-0.0110882	-0.0185411	-0.00516302	-0.00820541	-0.0198612	-0.014282	-0.000740909	-0.0162418	-0.0158563	-0.0213901	-0.0147655	-0.00682312	-0.0145188	-0.0112181	-0.0253161	-0.0116417	-0.0147603	-0.0139442	0.995604
1ST22010100083	-0.0175975	-0.0113594	-0.0139536	-0.0186924	-0.00931899	-0.00951835	-0.00709532	-0.00375867	-0.00722483	-0.0103453	-0.0167963	-0.00789798	-0.0163825	-0.0123767	-0.0120721	-0.025357	-0.0131381	-0.0124253	-0.00557891	-0.0209585	-0.0193948	-0.0116526	-0.0137372	-0.00349613	-0.0178704	-0.0042027	-0.0102272	-0.0109874	-0.0104455	-0.00575214	-0.0109812	-0.0205804	-0.0163662	-0.0219301	-0.013833	-0.0119073	-0.0140748	0.994369
1ST22010100035	-0.0142834	-0.0101287	-0.0134015	-0.0116345	-0.00953322	-0.00477536	-0.00840319	-0.00657523	-0.00753487	-0.017704	-0.0177369	-0.01006	-0.0152877	-0.0191925	-0.0178503	-0.0194086	-0.0165773	-0.0142441	-0.00956895	-0.0133498	-0.0147157	-0.0140302	-0.0107743	-0.0078853	-0.0204715	-0.00286031	-0.00935581	-0.00562172	-0.0111387	-0.0256356	-0.00350013	-0.0119499	-0.0111682	-0.016756	-0.0126343	-0.00856924	-0.00937967	-0.00767007	0.985943
1ST22010100041	-0.00812579	-0.00996609	-0.013638	-0.0145132	-0.0196044	-0.0181992	-0.0133016	-0.00852003	-0.00454635	-0.00851294	-0.0192028	-0.0118771	-0.0154203	-0.011606	-0.00819623	-0.0139933	-0.0196636	-0.0186875	-0.0180436	-0.0126203	-0.011352	-0.0124147	-0.0153055	-0.0067807	-0.0115519	-0.0124206	-0.010207	-0.00280882	-0.0136104	-0.00951566	-0.00989125	-0.0152517	-0.00330225	-0.00960856	-0.0118889	-0.0120626	-0.019347	-0.0112673	-0.0145229	0.996318
1ST22010100019	-0.0113752	-0.0174623	-0.00817038	-0.0177706	-0.0122289	-0.0185031	-0.0129508	-0.0100292	-0.0135433	-0.0156021	-0.014717	-0.0112868	-0.0118127	-0.0136102	-0.0127548	-0.00545238	-0.0184987	-0.0132917	-0.0127755	-0.00808667	-0.0149128	-0.00533454	-0.0130948	-0.0154743	-0.0118317	-0.00985862	-0.014111	-0.0111512	-0.0142415	-0.016014	-0.00863849	-0.00759683	-0.0094973	-0.0130735	-0.0144918	-0.00802389	-0.0137677	-0.012074	-0.0166548	-0.0180408	0.991449
1ST22010100023	-0.00240441	-0.00328678	-0.00782085	-0.0113702	-0.0147451	-0.00851045	-0.00717305	-0.0143017	-0.00976123	-0.00275963	-0.00917072	-0.00933276	-0.019342	-0.0130052	-0.00204378	-0.0128859	-0.017303	-0.00636441	-0.00861821	-0.00538223	-0.0107635	-0.0190105	-0.0121226	-0.00296718	-0.0106201	-0.0167015	-0.0155735	-0.011105	-0.0225931	-0.0101964	-0.0206142	-0.0114302	-0.0166435	-0.010896	-0.013336	-0.0211092	-0.00616185	-0.0129139	-0.00557652	-0.0131092	-0.0185937	0.989593
1ST22010100081	-0.0138001	-0.0025408	-0.0142992	-0.0113826	-0.0101276	-0.00597635	-0.0159664	-0.00764055	-0.00714731	-0.0120798	-0.0130946	-0.0176631	-0.0143732	-0.0192121	-0.0119068	-0.0185102	-0.00901336	-0.0177202	-0.0220175	-0.0123715	-0.0192135	-0.00170053	-0.00948471	-0.0126945	-0.00957074	-0.0165302	-0.0109639	-0.00451572	-0.00996886	-0.0105919	-0.0163558	-0.0151545	-0.0160412	-0.0216291	-0.0166213	-0.00701619	-0.00225473	-0.0123276	-0.014298	-0.0172965	-0.00731064	-0.0129242	0.988193
1ST22010100029	-0.00947556	-0.0192107	-0.0198892	-0.00698626	-0.00482914	-0.00942696	-0.025827	-0.0119533	-0.0118272	-0.0105013	-0.0227078	-0.0207465	-0.0169298	-0.0128041	-0.0136731	-0.0149121	-0.00338767	-0.00561255	-0.00838521	-0.00746421	-0.00459136	-0.00905466	-0.014005	-0.00545628	-0.00965267	-0.0170193	-0.0094014	-0.0204352	-0.0115196	-0.00637918	-0.0128216	-0.0159549	-0.0187175	-0.0189809	-0.0100057	-0.0142346	-0.00688676	-0.00984704	-0.020335	-0.0196215	-0.0135632	-0.00715479	-0.00861202	0.992165
1ST22010100057	-0.0209972	-0.016611	-0.0191016	-0.0154027	-0.011673	-0.0179711	-0.00877079	-0.0111817	-0.0115186	-0.011909	-0.0150791	-0.001942	-0.0151284	-0.00560645	-0.0143543	-0.0141803	-0.0101198	-0.0164397	-0.00826818	-0.0153299	-0.0148438	-0.0212549	0.00113542	-0.00767815	-0.0140059	-0.00783392	-0.011751	-0.0117608	-0.0106203	-0.0110597	-0.0145086	-0.0237886	-0.0173152	-0.0143058	-0.017568	-0.016688	-0.0141617	-0.00905944	-0.0100001	-0.00898332	-0.0170064	-0.0091372	-0.00840716	-0.0118099	0.999129
1ST22010100021	-0.0120158	-0.013481	-0.011589	-0.0127994	-0.00914957	-0.0146654	-0.0118911	-0.00969597	-0.0139844	-0.00267213	-0.0106398	-0.0146495	-0.00879723	-0.0107943	-0.0165246	-0.00735426	-0.0188678	-0.0205419	-0.0100474	-0.0101482	-0.0211652	-0.010653	-0.0126737	-0.0111337	-0.0118737	-0.01105	-0.0111275	-0.00902981	-0.0163829	-0.0144674	-0.0188663	-0.00580273	-0.0113832	-0.00805444	-0.0159226	-0.0159607	-0.00919556	-0.0112857	-0.0108374	-0.0100681	-0.00462439	-0.0210544	-0.0110166	-0.0111943	-0.0123625	0.996967
1ST22010100080	-0.00669618	-0.00334775	-0.0182673	-0.0042947	-0.0187256	-0.00989654	-0.0142827	-0.00746561	-0.0143643	-0.0129746	-0.0144603	-0.0166979	-0.00263141	-0.0109108	-0.0126419	-0.0176008	-0.00847921	-0.00953063	-0.0154405	-0.0108076	-0.00836576	-0.0233023	-0.0102597	-0.0159202	-0.0182007	-0.00747859	-0.0111243	-0.0127625	-0.0110472	-0.0110237	-0.0109682	-0.00694106	-0.00909698	-0.0147806	-0.0143469	-0.0197572	-0.00860962	-0.0171817	-0.0137718	-0.0186462	-0.012971	-0.0170759	-0.00975216	-0.0154379	-0.0128781	-0.0117357	0.997724
1ST22010100079	-0.0185083	-0.0134834	-0.00948404	-0.0145661	-0.0163844	-0.00397908	-0.0160685	-0.0193815	-0.0152082	-0.00104615	-0.00842313	-0.0166796	-0.0116176	-0.00924015	-0.0120089	-0.0101746	-0.0109835	-0.0106938	-0.00430237	-0.0170397	-0.00129082	-0.00996099	-0.0162445	-0.0190311	-0.00734997	-0.0213901	-0.0149616	-0.0136303	-0.012841	-0.00124263	-0.0114688	-0.0197909	-0.0104996	-0.0157682	-0.0141051	-0.0179987	-0.00589323	-0.0120625	-0.0190142	-0.0219967	-0.012841	-0.0138326	-0.00580642	-0.00443549	-0.0125246	-0.016539	-0.0213653	0.991662
1ST22010100036	-0.0138029	-0.0121467	-0.0219095	-0.00715459	-0.0173307	-0.0141294	-0.0146281	-0.01652	-0.00900208	-0.0112604	-0.011892	-0.0137464	-0.00636141	-0.0148963	-0.00587467	-0.0162858	-0.0107644	-0.0185372	-0.0137582	-0.0109693	-0.0154165	-0.0122165	-0.00714861	-0.010047	-0.0118726	-0.00582828	-0.0157962	-0.0148561	-0.00646728	-0.0155041	-0.0118324	-0.0177916	-0.0224221	-0.00984145	-0.00594322	-0.0123354	-0.00972132	-0.00907343	-0.00926371	-0.0110408	-0.00831128	-0.0148109	-0.0170025	-0.0159269	-0.0138861	-0.0180841	-0.0215773	-0.0159392	0.996418
1ST22010100039	-0.00159556	-0.0114265	-0.0122886	-0.00980306	-0.00874753	-0.0197075	-0.0202461	-0.00869525	-0.00495307	-0.00578247	-0.0108764	-0.020921	-0.0155237	-0.00573836	-0.0130653	-0.0127716	-0.0211161	-0.0104729	-0.014427	-0.0123964	-0.0157021	-0.00841495	-0.0157841	-0.0120728	-0.00778363	-0.0137133	-0.00669419	-0.000708983	-0.0123407	-0.0138898	-0.0229106	-0.0122658	-0.0129848	-0.00848262	-0.0101962	-0.0142894	-0.0180295	-0.0132466	-0.0151372	-0.0105681	-0.0119177	-0.0186168	-0.0170007	-0.0181683	-0.0166702	-0.00987607	-0.0139201	-0.0178133	-0.0107132
1ST22010100058	-0.0144573	-0.0165132	-0.0145653	-0.0123831	-0.0135947	-0.0130198	-0.013686	-0.0116186	-0.0130093	-0.012777	-0.0168252	-0.0216891	-0.0134499	-0.0144811	-0.00520403	-0.012901	-0.00977439	-6.52e-05	-0.0102937	-0.017523	-0.0121595	-0.0117295	-0.0160492	-0.0143097	-0.00589341	-0.0156708	-0.0121161	-0.00998654	-0.0119752	-0.0205171	-0.00808048	-0.00961724	-0.00578616	-0.0133936	-0.0134788	-0.0187853	-0.0101922	-0.0185008	-0.0128798	-0.00862201	-0.018066	-0.0143637	-0.017186	-0.00813575	-0.0238324	-0.0112508	-0.0108724	-0.007238	-0.0113295
1ST22010100017	-0.00832774	-0.0141514	-0.013393	-0.011594	-0.0135958	-0.0169323	-0.00749256	-0.01886	-0.00577009	-0.00954509	-0.0135614	-0.0127575	-0.0081186	-0.0115366	-0.0087574	-0.00808857	-0.00859407	-0.0112899	-0.0162499	-0.0126626	-0.0120489	-0.0184679	-0.0185409	-0.00580123	-0.0150427	-0.0100202	-0.0153023	-0.0164855	-0.00994075	-0.00903112	-0.0116658	-0.0157091	-0.0138178	-0.00845347	-0.00828313	-0.0158807	-0.00957064	-0.0091303	-0.00591997	-0.00898233	-0.0131578	-0.00745983	-0.0089969	-0.0148024	-0.00631152	-0.0172389	-0.0145136	-0.0161079	-0.0110911
1ST22010100070	-0.0122612	-0.0133591	-0.0150992	-0.023087	-0.0092752	-0.0071436	-0.0157207	-0.013781	-0.00938424	-0.00814614	-0.00647078	-0.00732732	-0.0133293	-0.015965	-0.0126031	-0.0107129	-0.00418563	-0.00450264	-0.0107318	-0.00525272	-0.00807948	-0.00707466	-0.00872019	-0.0121854	-0.0197983	-0.0159573	-0.0161704	-0.00743119	-0.0173786	-0.00351309	-0.00957235	-0.0152122	-0.0130894	-0.0122512	-0.0103167	-0.00860654	-0.0103509	-0.0237925	-0.00950219	-0.00630613	-0.014441	-0.0123672	-0.00215374	-0.0125014	-0.00705191	-0.0166701	-0.0151183	-0.00533723	-0.0108097
1ST22010100055	-0.0103119	-0.0118489	-0.0176762	-0.0115984	-0.0148616	-0.0115486	-0.012111	-0.0170125	-0.0135896	-0.020885	-0.017198	-0.0217825	-0.0136232	-0.0120839	-0.00961605	-0.0113979	-0.0172997	-0.00964998	-0.00611634	-0.0105517	-0.0165636	-0.00684168	-0.00935732	-0.0111302	-0.00874884	-0.0113259	-0.0146203	-0.0152208	-0.00929864	-0.00462917	-0.0149911	-0.0105967	-0.00815463	-0.0147643	-0.00803219	-0.0175217	-0.0132232	-0.00698744	-0.0156793	-0.0026326	-0.00407797	-0.0123337	-0.013759	-0.0166748	-0.0108182	-0.0195424	-0.0112292	-0.0168947	-0.0142249
1ST22010100025	-0.0120525	-0.00910317	-0.0103484	-0.00571552	-0.0116289	-0.0207289	-0.00952494	-0.0143705	-0.00439389	-0.0139723	-0.0118818	-0.0127623	-0.00713353	-0.00553042	-0.00489061	-0.00700771	-0.00802411	-0.0168826	-0.0205972	-0.0103604	-0.0153585	-0.0150721	-0.0120557	-0.0251401	-0.00827017	-0.00887545	-0.0076996	-0.0206733	-0.00922709	-0.0190781	-0.0175378	-0.0111798	-0.0208234	-0.0193786	-0.0117923	-0.0135306	-0.0201604	-0.00798558	-0.000736024	-0.00603352	-0.0136575	-0.00904518	-0.0141425	-0.0139451	-0.00902242	-0.0182894	-0.0114211	-0.018739	-0.0223355
1ST22010100001	-0.0159178	-0.0095439	-0.0136469	-0.0235185	-0.0158933	-0.0147995	-0.00755492	-0.00921541	0.00083307	-0.0190031	-0.00413235	-0.0187271	-0.0160519	-0.00642618	-0.0159882	-0.0158303	-0.0145157	-0.0187842	-0.0098702	-0.00979536	-0.0230076	-0.0165825	-0.0233689	-0.0158499	-0.0171246	-0.00690543	-0.012004	-0.01191	-0.0162535	-0.00883803	-0.0064596	-0.0120037	-0.0101762	-0.0138642	-0.00856103	-0.00768105	-0.00988847	-0.00456272	-0.00689236	-0.0152472	-0.0121904	-0.014994	-0.0162197	-0.011983	-0.014149	-0.0103803	-0.0172821	-0.0180781	-0.00841545
1ST22010100045	-0.0136482	-0.0119123	-0.0116727	-0.0171379	-0.0145178	-0.0162578	-0.00796753	-0.00497413	-0.0201988	-0.00748957	-0.00903921	-0.00523385	-0.0103737	-0.0106465	-0.0165764	-0.00787703	-0.0222085	-0.014942	-0.0100673	-0.0204657	-0.0238034	-0.0202042	-0.0143619	-0.00750553	-0.0202593	-0.00996828	-0.0133745	-0.020425	-0.0206894	-0.0180635	-0.0160682	-0.0135578	-0.0131353	-0.0169111	-0.0133002	-0.00941079	-0.0129114	-0.0107627	-0.0109371	-0.00191368	-0.0117807	-0.0169313	-0.0169516	-0.0100008	-0.00790406	0.00208316	-0.00960028	-0.0108433	-0.0145037
1ST22010100028	-0.0144798	-0.0107961	-0.0115224	-0.00613122	-0.00772595	-0.0151895	-0.010252	-0.00874334	-0.0126166	-0.0175252	-0.0100863	-0.00509157	-0.0183578	-0.0142561	-0.0168971	-0.0145679	-0.0096851	-0.00868497	-0.0157204	-0.012692	-0.0170115	-0.0125821	-0.0129025	-0.0185549	-0.0115756	-0.0155416	0.000849234	-0.0148944	-0.013219	-0.0125249	-0.0110086	-0.00739656	-0.0155634	-0.0133682	-0.00590171	-0.0141858	-0.007748	-0.016376	-0.0198791	-0.0123085	-0.0156298	-0.00992388	-0.00988037	-0.000870032	-0.0142197	-0.0103473	-0.0050755	-0.0129042	-0.0143215
1ST22010100020	-0.0149626	-0.0182877	-0.00951467	-0.00398777	-0.00983726	-0.0152573	-0.00671953	-0.010711	-0.0158216	-0.00641719	-0.0181367	-0.0150498	-0.00613221	-0.0159682	-0.015983	-0.00403466	-0.0155962	-0.011371	-0.011262	-0.00584673	-0.0110763	-0.0157152	-0.0128106	-0.0147272	-0.0109968	-0.00496844	-0.0101388	-0.0126392	-0.00880052	-0.0148757	-0.0125372	-0.0133635	-0.00961225	-0.00919716	-0.0133375	-0.00971143	-0.0115038	-0.0201157	-0.0157958	-0.0156572	-0.014093	-0.0137435	-0.0157755	-0.0107245	-0.0131141	-0.0134484	-0.0122558	-0.00634634	-0.012226
1ST22010100008	-0.0159534	-0.0136986	-0.0154946	-0.0110853	-0.0111553	-0.012592	-0.0122364	-0.0157649	-0.016477	-0.00688906	-0.0140744	-0.00819364	-0.00990092	-0.0143407	-0.0216117	-0.0142933	-0.0139207	-0.0133277	-0.00668081	-0.00906465	-0.0160743	-0.0119403	-0.0132186	-0.0192702	-0.00554548	-0.0162568	-0.0216906	-0.00913568	-0.016361	-0.0122424	-0.00541756	-0.0151126	-0.0091821	-0.00653983	-0.00763076	-0.00869853	-0.0059088	-0.016724	-0.0180079	-0.0187633	-0.00582388	-0.0158438	-0.01687	-0.0174389	-0.0165315	-0.0201787	-0.00943084	-0.0141144	-0.0103509
1ST22010100040	-0.0137026	-0.00863787	-0.011735	-0.00757318	-0.0133908	-0.0154022	-0.00656907	-0.0146796	-0.0157829	-0.0123016	-0.0111611	-0.00602265	-0.00571033	-0.00983079	-0.00864016	-0.00120999	-0.0147033	-0.0158904	-0.0138176	0.00167175	-0.00543373	-0.0123238	-0.00670507	-0.00924425	-0.0178311	-0.00916054	-0.0140595	-0.00976661	-0.0127212	-0.0160344	-0.0130014	-0.0159671	-0.00847991	-0.00863159	-0.0269332	-0.0191083	-0.0120398	-0.00822278	-0.0134741	-0.00523296	-0.0256691	-0.00864377	-0.00609369	-0.0135197	0.00118969	-0.0126434	-0.0122969	-0.0128295	-0.00840349
1ST22010100049	-0.00822905	-0.00818545	-0.0221071	-0.00775938	-0.0116052	-0.0107189	-0.0125267	-0.00800066	-0.0110038	-0.0148986	-0.00899239	-0.0160116	-0.0229555	-0.0207537	-0.0143983	-0.0228376	-0.0114649	-0.014983	-0.0154487	-0.00901166	-0.0182086	-0.00775229	-0.0187934	-0.00330774	-0.0137386	-0.0144556	-0.0126571	-0.0175443	-0.00717585	-0.0159652	-0.00954751	-0.0183086	-0.00793968	-0.00903331	-0.00832016	-0.00649023	-0.00584783	-0.0100853	-0.0106109	-0.0176486	-0.0148312	-0.0077523	-0.0168809	-0.00435018	-0.00419322	-0.0165335	-0.018973	-0.0141253	-0.00857372
1ST22010100078	-0.0165332	-0.00824352	-0.0166173	-0.0239424	-0.0137707	-0.00845407	-0.0148519	-0.0109804	-0.0207449	-0.0153558	-0.0156441	-0.0139382	-0.014975	-0.0187203	-0.0120216	-0.0166293	-0.00333279	-0.00416868	-0.0101184	-0.022744	-0.0081606	-0.00740325	-0.0147165	-0.0105103	-0.0146348	-0.0127495	-0.0168582	-0.0192628	-0.00929344	-0.012902	-0.0113059	-0.00616114	-0.0172896	-0.00482863	-0.00685355	-0.00978129	-0.00401401	-0.00647138	-0.0105253	-0.0199179	-0.00886239	-0.00593444	-0.0113271	-0.00273189	-0.0123058	-0.011826	-0.0171232	-0.0115171	-0.0122878
1ST22010100005	-0.00723172	-0.00967072	-0.0140691	-0.015998	-0.0265573	-0.00966574	-0.0110425	-0.0129823	-0.00900865	-0.00814573	-0.0147723	-0.00925073	-0.0182462	-0.0124921	-0.0164583	-0.0212575	-0.0182028	-0.0180489	-0.0107075	-0.015973	-0.0160219	-0.00923757	-0.0100689	0.00623104	-0.0169561	-0.00862082	-0.0163217	-0.0129628	-0.0107765	-0.0156463	-0.00898124	-0.00869792	-0.0108379	-0.0120912	-0.011833	-0.0133798	-0.0100791	-0.00563947	-0.0143313	-0.00484491	-0.00991441	-0.00570923	-0.00909827	-0.0110322	-0.00739477	-0.0104432	-0.0151658	-0.00936808	-0.0134357
1ST22010100082	-0.0129467	-0.0205665	-0.00969398	-0.00435866	-0.0106153	-0.00565784	-0.018817	-0.0118003	-0.011818	-0.0174529	-0.0182682	-0.0158598	-0.00561702	-0.0122361	-0.0110135	-0.0132823	-0.00337838	-0.0126599	-0.0128782	-0.00760661	-0.0215053	-0.00364112	-0.0125828	-0.0189138	-0.0123655	-0.0200434	-0.0169836	-0.013513	-0.00707995	-0.0197888	-0.0147281	-0.0136706	-0.0208874	-0.0094483	-0.0142831	-0.00950757	-0.00863368	-0.00916722	-0.0162386	-0.0120766	-0.00780637	-0.0149685	-0.0132247	-0.00961864	-0.0131497	-0.00888603	-0.0056339	-0.0130315	-0.011144
1ST22010100076	-0.0166976	-0.0102758	-0.00740195	-0.0178404	-0.00940092	-0.0146613	-0.0135714	-0.0167565	-0.0186421	-0.010531	-0.0226018	-0.00969619	-0.00556814	-0.00916972	-0.0126729	-0.0106231	-0.0162854	-0.0162432	-0.0184411	-0.00889881	-0.0194847	-0.0109283	-0.015695	-0.016973	-0.0123645	-0.0119879	-0.00655729	-0.0140868	-0.0131857	-0.0182232	-0.00205067	-0.00562301	-0.0133748	-0.00428252	-0.00690614	-0.00197095	-0.0121211	-0.0186736	-0.00556474	-0.00573737	-0.00596138	-0.0195017	-0.0214299	-0.0171373	-0.02082	-0.0171551	-0.0123304	-0.0174928	-0.00566692
1ST22010100052	-0.0142856	-0.0159343	-0.00658653	-0.0139516	-0.0165602	-0.00340453	-0.0126521	-0.0172423	-0.00886218	-0.0162853	-0.00896616	-0.0180768	-0.00856842	-0.0136947	-0.0144758	-0.0122503	-0.00965855	-0.00782025	-0.00433451	-0.00921691	-0.00680703	-0.0154373	-0.0123252	-0.0203644	-0.0194519	-0.00661435	-0.0108987	-0.00897664	-0.0159146	-0.0182699	-0.00766128	-0.00721835	-0.0129824	-0.0202067	-0.00994632	-0.016123	-0.0193043	-0.0129169	-0.0148793	-0.0118908	-0.00758066	-0.0124358	-0.0133263	-0.0118676	-0.0171468	-0.0135777	-0.00984654	-0.00999592	-0.0162827
1ST22010100085	-0.0178895	-0.0125055	-0.014062	-0.015504	-0.00790266	-0.00960278	-0.0132865	-0.013534	-0.0168486	-0.0120342	-0.00968031	-0.0143685	-0.0133537	-0.0165562	-0.00716737	-0.019191	-0.00957444	-0.00511781	-0.00926351	-0.0109129	-0.00844718	-0.00716297	-0.0180445	-0.00819453	-0.0108104	-0.0160057	-0.0198988	-0.00830979	-0.0123181	-0.0114005	-0.0124466	-0.0177671	-0.0164426	-0.0122358	-0.0133267	-0.0177073	-0.00915405	-0.015946	-0.0130151	-0.0225594	-0.00938845	-0.0100048	-0.0107915	-0.00815133	-0.0171745	-0.0136931	-0.00559547	0.000944625	-0.016909
1ST22010100042	-0.0200042	-0.0241435	-0.0145083	-0.0109292	-0.0156052	-0.00838073	-0.0194324	-0.0159122	-0.0220685	-0.0158812	-0.0114438	-0.017074	-0.0130736	-0.0128356	-0.0155884	-0.00984256	-0.00336322	-0.00989873	-0.0117215	-0.0107366	-0.0046148	-0.00625226	-0.00703566	-0.0213652	-0.00699395	-0.0146878	-0.0147812	-0.0168984	-0.00838991	-0.0128606	-0.0129249	-0.00876201	-0.0142547	-0.0111414	-0.0154494	-0.0149366	-0.00681442	-0.0147719	-0.01501	-0.0179846	-0.0199089	-0.0190245	-0.0118365	-0.00470211	-0.0199677	-0.0121118	-0.0108234	-0.00186458	-0.00546116
1ST22010100068	-0.0129344	-0.0190534	-0.00863588	-0.00623819	-0.0146102	-0.0198785	-0.0142385	-0.0114846	-0.015294	-0.0151815	-0.00877238	-0.0177074	-0.00677811	-0.0114973	-0.00538934	-0.00872777	-0.0140229	-0.0147071	-0.0164181	-0.0105238	-0.00981433	-0.0122261	-0.00817199	-0.0110065	-0.0139177	-0.00948593	-0.0172587	-0.015161	-0.00879982	-0.0115463	-0.0182841	-0.00957105	-0.0032334	-0.0141537	-0.0136561	-0.0149634	-0.0164603	-0.0147028	-0.012147	-0.0138204	-0.0196722	-0.016872	-0.0123023	-0.0194888	-0.0140393	-0.0165769	-0.00886248	-0.0139372	-0.0134626
1ST22010100066	-0.00716088	-0.00987928	-0.00944812	-0.00837553	-0.00767926	-0.0180486	-0.0132706	-0.00648545	-0.0137035	-0.00603133	-0.00579284	-0.0121255	-0.0064169	-0.0131078	-0.0160442	-0.014162	-0.0174534	-0.0141304	-0.0148275	-0.00338537	-0.0152325	-0.00796134	-0.0112513	-0.0142455	-0.0126544	-0.0123657	-0.015277	-0.0114471	-0.0127652	-0.00792013	-0.0153045	-0.00847542	-0.00708704	-0.0145828	-0.00216702	-0.020174	-0.0176158	-0.0140702	-0.0150268	-0.0109686	-0.0169561	-0.0161117	-0.00951438	-0.0205964	-0.0109321	-0.00848851	-0.0104011	-0.0186769	-0.00868696
1ST22010100022	-0.00732462	-0.0161897	-0.0166127	-0.024321	-0.0102857	-0.0209024	-0.00587477	-0.0164519	-0.0166213	-0.0149361	0.00154712	-0.0122493	-0.0122643	-0.0122418	-0.0179322	-0.0131124	-0.0125402	-0.0122824	-0.0157896	-0.0165928	-0.00560955	-0.0171296	-0.015111	-0.00320157	-0.0167217	0.00301284	-0.00471997	-0.0137342	-0.00421986	-0.0207923	-0.0104551	-0.0100521	-0.00887925	-0.0141159	-0.0193258	-0.0175678	-0.0151612	-0.00874983	-0.00886827	-0.0152354	-0.00930481	-0.0153654	-0.0104045	-0.0133682	-0.00597097	-0.011071	-0.0140134	-0.011297	-0.0146222
1ST22010100011	-0.0158493	-0.0209306	-0.0120218	-0.0113244	-0.0162639	-0.0176607	-0.0171535	-0.0123081	-0.0100746	-0.00163617	-0.00582009	-0.0119851	-0.0121677	-0.0153302	-0.0216673	0.113142	-0.0170097	-0.0131039	-0.00672842	-0.0122654	-0.0107815	-0.0149574	-0.00648894	-0.0169788	-0.0062716	-0.0150911	-0.01358	-0.012975	-0.0172149	-0.0175106	-0.0159863	-0.0159744	-0.00984434	-0.0139874	-0.0120289	-0.0116758	-0.012598	-0.00960317	-0.0202428	-0.0184277	-0.0155225	-0.00922589	-0.018091	-0.0188675	-0.0215364	-0.00946568	-0.0193929	-0.0111525	-0.0193232
1ST22010100059	-0.0147595	-0.0120497	-0.0148675	-0.0108972	-0.00826109	-0.0156928	-0.0218271	-0.00851214	-0.00230332	-0.0112591	-0.0149561	-0.0198199	-0.00738189	-0.0141925	-0.0166899	-0.0148077	-0.00752209	-0.0178813	-0.00976562	-0.00617841	-0.0170597	-0.0212596	-0.0139405	-0.0141408	-0.0138031	-0.0124606	-0.00595229	-0.0151262	-0.00495725	-0.0119744	-0.0123819	-0.0122902	-0.0143025	-0.00516231	-0.0134217	-0.0116556	-0.0126337	-0.00943135	-0.00695542	-0.00944302	-0.0141692	-0.0226007	-0.0157958	-0.00857361	-0.008704	-0.00685911	-0.0175367	-0.0187398	-0.0110649
1ST22010100024	-0.0118329	-0.0127792	-0.0119409	-0.0191942	-0.0123114	-0.00919794	-0.00658333	-0.0202418	-0.0104328	-0.0148624	-0.0199244	-0.0197032	-0.00886977	-0.0142914	-0.013476	-0.0142999	-0.0149411	-0.0138292	-0.009641	-0.00606974	-0.0092637	-0.0123061	-0.00596098	-0.00854806	-0.0104454	-0.0144513	-0.00841404	-0.0107308	-0.00914327	-0.00804206	-0.0107007	-0.0108405	-0.0183448	-0.0138745	-0.00574544	-0.0057675	-0.019446	-0.0158286	-0.0132409	-0.013206	-0.00766648	-0.0156269	-0.018513	-0.0181639	-0.01293	-0.0159625	-0.0129658	-0.0164359	-0.0139577
1ST22010100015	-0.0083031	-0.0125941	-0.0134561	-0.0142275	-0.00872568	-0.0155906	-0.00963919	-0.00828225	-0.0148058	-0.00954442	-0.0103038	-0.0189833	-0.0152305	-0.00878185	-0.0184397	-0.010802	-0.0131914	-0.0142588	-0.0191708	-0.0136598	-0.014874	-0.00932707	-0.0155147	-0.016154	-0.0199274	-0.0164136	-0.00934652	-0.0152316	-0.0105627	-0.0172126	-0.0103879	-0.0175524	-0.0138491	-0.00779021	-0.00554438	-0.0044808	-0.00693566	-0.00791625	-0.0119382	-0.0204048	-0.0178349	-0.0210616	-0.00886847	-0.00915793	-0.0103021	-0.0133028	-0.0127727	-0.0122595	-0.0125353
1ST22010100047	-0.0104825	-0.00708613	-0.0123386	-0.018658	-0.0108332	-0.00866968	-0.0112677	-0.00770759	-0.0177834	-0.0169045	-0.0200347	-0.0107213	-0.0120295	-0.013835	-0.0122532	-0.00938117	-0.00283796	-0.00632409	-0.00691751	-0.0142266	-0.0128625	-0.0064135	-0.0173109	-0.0135917	-0.0122801	-0.0153919	-0.0164113	-0.0179378	-0.00742559	-0.00986071	-0.0103321	-0.0149502	-0.00891586	-0.003783	-0.00778762	-0.0112422	-0.00810124	-0.0143264	-0.0122337	-0.00937287	-0.0193996	-0.0087524	-0.0127242	-0.0168214	-0.0179576	-0.0150031	-0.012685	-0.0101921	-0.0139803
1ST22010100026	-0.013193	-0.0108264	-0.00606865	-0.0102327	-0.0110611	-0.00981561	-0.0114717	-0.0253377	-0.0129743	-0.0147057	-0.0110826	-0.00920902	-0.0111957	-0.0104627	-0.0192824	-0.0190845	-0.0120065	-0.0194999	-0.0161898	-0.0162586	-0.0075185	-0.0204594	-0.0131803	-0.0160547	-0.00523575	-0.00918579	-0.0111312	-0.0134639	-0.0155723	-0.0208413	-0.00949831	-0.0122963	-0.0202716	-0.00674896	-0.0149844	-0.00818924	-0.00808168	-0.0239739	-0.0135312	-0.0118519	0.00237274	-0.0227265	-0.0169275	-0.0196836	-0.0110331	-0.00794288	-0.00236778	-0.0134534	-0.00410211
1ST22010100084	-0.01281	-0.0109543	-0.00523865	-0.00439757	-0.0073334	-0.0087142	-0.00708144	-0.0106019	-0.0103003	-0.0115687	-0.0131902	-0.0104865	-0.0181728	-0.00561743	-0.00572798	-0.010184	-0.0156068	-0.0139521	-0.0180579	-0.0190767	-0.0153816	-0.0158696	-0.00937277	-0.0166377	-0.0125082	-0.0088507	-0.0160567	-0.00776446	-0.0148141	-0.00925065	-0.0173934	-0.0104605	-0.00575133	-0.0120576	-0.00384876	-0.0142722	-0.0154818	-0.0141474	-0.0168443	-0.0103673	-0.0120362	-0.0100422	-0.00959959	-0.0155807	-0.00376904	-0.0209229	-0.0121707	-0.0111785	-0.0151344
1ST22010100073	-0.00863457	-0.0141948	-0.0256738	-0.0186861	-0.00633508	-0.00287039	-0.00977909	-0.00887714	-0.0197592	-0.0123186	-0.0193443	-0.0109569	-0.0098623	-0.00473883	-0.00759543	-0.0119956	-0.0151992	-0.0115888	-0.00579604	-0.0183897	-0.0160916	-0.00965058	-0.0174028	-0.00894191	-0.0130585	-0.0136877	-0.0137572	-0.0138867	-0.0133209	-0.0134011	-0.0109269	-0.00789757	-0.00436185	-0.016248	-0.0112083	-0.0042934	-0.0144516	-0.0174916	-0.0142574	-0.0181419	-0.0134726	-0.0180005	-0.0106049	-0.0139038	-0.0157186	-0.0155101	-0.0201529	-0.0115452	-0.0101367
[truncated: 31 more columns]
