# Supplementary material for: Genetic structure and demographic history of Northern Han people in Liaoning Province inferred from genome-wide array data
Source: Frontiers journal article supplement (doi:10.3389/fevo.2022.1014024), 2022-11-03
Supplement: Table_3.XLSX [file Table_3.XLSX]

## Sheet: cv
Supplementary Table 3. Cross-validation value of K ranging from 2 to 20
CV error	K	Value
CV error	K=2	0.66864
CV error	K=3	0.66485
CV error	K=4	0.66334
CV error	K=5	0.66219
CV error	K=6	0.66187
CV error	K=7	0.66159
CV error	K=8	0.66133
CV error	K=9	0.66111
CV error	K=10	0.66157
CV error	K=11	0.662
CV error	K=12	0.66247
CV error	K=13	0.66322
CV error	K=14	0.66638
CV error	K=15	0.66765
CV error	K=16	0.66956
CV error	K=17	0.67372
CV error	K=18	0.67482
CV error	K=19	0.67805
CV error	K=20	0.683
