# Supplementary material for: Genetic structure and demographic history of Northern Han people in Liaoning Province inferred from genome-wide array data
Source: Frontiers journal article supplement (doi:10.3389/fevo.2022.1014024), 2022-11-03
Supplement: Table_4.XLSX [file Table_4.XLSX]

## Sheet: FST
Supplementary Table 4: Pairwise-FST genetic distances among East Asian populations
	Han_Dandong	Han_Dalian	Han_Shenyang	Han_Panjin	Han_Fujian	Mongolian_FX	Han_Guangdong	Han_Henan	Han_Hubei	Han_Jiangsu	Han_Shanghai	Han_Shanxi	Han_Sichuan	Han_Zhejiang	Han_Shandong	Han_Chongqing	Han_HGDP	CHS.SG	CHB.SG	Tibetan_Gannan	Tibetan_Chamdo	Tibetan_Gangcha	Tibetan_Xunhua	Tibetan_Lhasa	Tibetan_Yunnan	Tibetan_Nagqu	Tibetan_Yajiang	Tibetan_Shigatse	Tibetan_Xinlong	Tibetan_Shannan	Qiang_Danba	Qiang_Daofu	Yi	China_Lahu	Naxi	Sherpa	She	Miao	Gelao	Dong_Guizhou	Dong_Hunan	Dai	Li	Maonan	Mulam	Zhuang	Ami	Atayal	Yakut
Han_Dandong	0	0	0	0	0.003	0.001	0.005	0	0	0	0.001	0	0	0	0	0.001	0.001	0.006	0.004	0.004	0.011	0.008	0.003	0.013	0.023	0.01	0.008	0.014	0.002	0.014	0.007	0.007	0.006	0.026	0.007	0.015	0.01	0.007	0.014	0.008	0.007	0.013	0.016	0.013	0.01	0.009	0.034	0.059	0.03
Han_Dalian	0	0	0.001	0	0.003	0.002	0.006	0	0.001	0.001	0.001	0.001	0.001	0.001	0	0.002	0.002	0.007	0.005	0.005	0.011	0.009	0.003	0.013	0.024	0.011	0.008	0.014	0.003	0.015	0.007	0.008	0.006	0.026	0.008	0.015	0.011	0.008	0.014	0.009	0.008	0.014	0.017	0.013	0.011	0.01	0.035	0.06	0.031
Han_Shenyang	0	0.001	0	0	0.003	0.001	0.005	0	0.002	0.001	0	0	0.001	0	0	0.002	0.001	0.006	0.004	0.004	0.01	0.008	0.002	0.013	0.022	0.01	0.008	0.013	0.003	0.014	0.006	0.007	0.006	0.026	0.007	0.015	0.011	0.007	0.014	0.008	0.007	0.014	0.016	0.013	0.011	0.009	0.034	0.06	0.03
Han_Panjin	0	0	0	0	0.003	0.001	0.005	-0.001	0.001	0	-0.001	0	0.001	0	0	0.002	0.001	0.006	0.004	0.004	0.01	0.008	0.003	0.013	0.023	0.01	0.008	0.013	0.003	0.014	0.006	0.007	0.006	0.025	0.008	0.014	0.01	0.007	0.014	0.008	0.007	0.013	0.015	0.013	0.011	0.009	0.035	0.059	0.029
Han_Fujian	0.003	0.003	0.003	0.003	0	0.005	0.001	0.003	0	0	0.001	0.003	0.001	0.001	0.003	0.001	0.001	0.004	0.006	0.007	0.017	0.014	0.008	0.018	0.028	0.016	0.013	0.019	0.005	0.019	0.01	0.011	0.009	0.024	0.011	0.02	0.008	0.006	0.011	0.005	0.004	0.009	0.011	0.008	0.005	0.005	0.029	0.053	0.037
Mongolian_FX	0.001	0.002	0.001	0.001	0.005	0	0.007	0	0.003	0.002	0.002	0.001	0.002	0.002	0.002	0.003	0.003	0.008	0.005	0.003	0.009	0.007	0.002	0.012	0.023	0.009	0.008	0.013	0.003	0.013	0.007	0.007	0.006	0.026	0.008	0.014	0.012	0.009	0.015	0.01	0.009	0.015	0.018	0.014	0.012	0.01	0.036	0.061	0.023
Han_Guangdong	0.005	0.006	0.005	0.005	0.001	0.007	0	0.006	0.001	0.003	0.002	0.005	0.003	0.001	0.005	0.001	0.002	0.004	0.007	0.009	0.018	0.016	0.01	0.022	0.029	0.018	0.014	0.021	0.007	0.022	0.012	0.013	0.011	0.022	0.012	0.023	0.009	0.005	0.007	0.002	0.001	0.005	0.006	0.005	0.004	0.002	0.025	0.051	0.038
Han_Henan	0	0	0	-0.001	0.003	0	0.006	0	0	0	-0.001	0	-0.001	0	0.001	0.001	0.001	0.006	0.004	0.003	0.009	0.007	0.002	0.012	0.023	0.009	0.008	0.012	0.003	0.013	0.005	0.005	0.005	0.026	0.006	0.014	0.012	0.007	0.014	0.008	0.007	0.012	0.016	0.013	0.011	0.009	0.034	0.059	0.029
Han_Hubei	0	0.001	0.002	0.001	0	0.003	0.001	0	0	0	-0.001	0.001	0.001	-0.002	0.001	0.001	0	0.004	0.004	0.006	0.013	0.01	0.005	0.016	0.026	0.013	0.01	0.017	0.003	0.017	0.008	0.009	0.007	0.023	0.008	0.017	0.008	0.005	0.011	0.005	0.005	0.008	0.012	0.008	0.007	0.005	0.029	0.054	0.034
Han_Jiangsu	0	0.001	0.001	0	0	0.002	0.003	0	0	0	-0.002	0	0	-0.001	0	0.001	0.001	0.005	0.004	0.005	0.012	0.009	0.004	0.014	0.024	0.012	0.01	0.014	0.003	0.015	0.007	0.008	0.006	0.024	0.007	0.016	0.01	0.007	0.013	0.006	0.005	0.012	0.012	0.01	0.009	0.007	0.032	0.056	0.032
Han_Shanghai	0.001	0.001	0	-0.001	0.001	0.002	0.002	-0.001	-0.001	-0.002	0	0	-0.002	-0.001	-0.001	-0.001	0	0.004	0.003	0.004	0.011	0.007	0.004	0.015	0.024	0.012	0.008	0.016	0.002	0.017	0.006	0.008	0.005	0.026	0.007	0.016	0.01	0.007	0.013	0.006	0.005	0.012	0.015	0.01	0.008	0.006	0.031	0.057	0.032
Han_Shanxi	0	0.001	0	0	0.003	0.001	0.005	0	0.001	0	0	0	0	0	0.001	0	0.001	0.006	0.004	0.004	0.009	0.007	0.002	0.012	0.023	0.009	0.007	0.013	0.003	0.013	0.006	0.006	0.005	0.026	0.006	0.015	0.01	0.007	0.015	0.009	0.007	0.014	0.017	0.013	0.011	0.009	0.035	0.06	0.029
Han_Sichuan	0	0.001	0.001	0.001	0.001	0.002	0.003	-0.001	0.001	0	-0.002	0	0	0	0.001	0	-0.001	0.004	0.004	0.006	0.012	0.009	0.005	0.014	0.025	0.011	0.009	0.015	0.003	0.016	0.006	0.008	0.006	0.022	0.008	0.017	0.008	0.004	0.009	0.004	0.003	0.008	0.01	0.007	0.005	0.004	0.029	0.054	0.033
Han_Zhejiang	0	0.001	0	0	0.001	0.002	0.001	0	-0.002	-0.001	-0.001	0	0	0	0.001	0	0	0.004	0.004	0.004	0.012	0.01	0.003	0.015	0.025	0.012	0.009	0.015	0.003	0.016	0.008	0.009	0.006	0.023	0.008	0.017	0.009	0.005	0.011	0.006	0.004	0.009	0.011	0.009	0.008	0.007	0.03	0.056	0.032
Han_Shandong	0	0	0	0	0.003	0.002	0.005	0.001	0.001	0	-0.001	0.001	0.001	0.001	0	0.001	0.002	0.006	0.004	0.004	0.011	0.008	0.003	0.013	0.024	0.01	0.008	0.014	0.002	0.014	0.007	0.008	0.006	0.025	0.007	0.015	0.011	0.007	0.014	0.008	0.007	0.014	0.016	0.013	0.01	0.009	0.034	0.06	0.03
Han_Chongqing	0.001	0.002	0.002	0.002	0.001	0.003	0.001	0.001	0.001	0.001	-0.001	0	0	0	0.001	0	0.001	0.004	0.005	0.004	0.012	0.011	0.007	0.015	0.025	0.013	0.009	0.016	0.002	0.017	0.008	0.009	0.006	0.022	0.007	0.016	0.009	0.005	0.009	0.003	0.002	0.008	0.01	0.007	0.005	0.003	0.029	0.054	0.035
Han_HGDP	0.001	0.002	0.001	0.001	0.001	0.003	0.002	0.001	0	0.001	0	0.001	-0.001	0	0.002	0.001	0	0.004	0.004	0.005	0.013	0.011	0.005	0.016	0.025	0.013	0.01	0.016	0.004	0.017	0.008	0.009	0.007	0.022	0.008	0.017	0.008	0.005	0.01	0.004	0.003	0.008	0.009	0.008	0.006	0.004	0.029	0.054	0.033
CHS.SG	0.006	0.007	0.006	0.006	0.004	0.008	0.004	0.006	0.004	0.005	0.004	0.006	0.004	0.004	0.006	0.004	0.004	0	0.006	0.01	0.018	0.016	0.01	0.021	0.03	0.018	0.015	0.022	0.008	0.022	0.013	0.014	0.011	0.026	0.013	0.023	0.011	0.009	0.013	0.007	0.006	0.011	0.012	0.01	0.008	0.007	0.031	0.056	0.039
CHB.SG	0.004	0.005	0.004	0.004	0.006	0.005	0.007	0.004	0.004	0.004	0.003	0.004	0.004	0.004	0.004	0.005	0.004	0.006	0	0.008	0.015	0.013	0.007	0.017	0.028	0.015	0.013	0.018	0.007	0.019	0.011	0.011	0.01	0.028	0.011	0.02	0.013	0.01	0.016	0.01	0.009	0.015	0.017	0.014	0.012	0.01	0.035	0.061	0.035
Tibetan_Gannan	0.004	0.005	0.004	0.004	0.007	0.003	0.009	0.003	0.006	0.005	0.004	0.004	0.006	0.004	0.004	0.004	0.005	0.01	0.008	0	0.008	0.006	0.003	0.009	0.023	0.007	0.006	0.011	0.004	0.011	0.006	0.005	0.006	0.028	0.008	0.012	0.014	0.011	0.017	0.013	0.01	0.017	0.019	0.016	0.014	0.014	0.038	0.062	0.027
Tibetan_Chamdo	0.011	0.011	0.01	0.01	0.017	0.009	0.018	0.009	0.013	0.012	0.011	0.009	0.012	0.012	0.011	0.012	0.013	0.018	0.015	0.008	0	0.001	0.003	0.002	0.018	0	0.001	0.004	0.004	0.004	0.004	0.002	0.005	0.033	0.008	0.006	0.023	0.018	0.026	0.022	0.02	0.027	0.031	0.027	0.025	0.024	0.05	0.075	0.032
Tibetan_Gangcha	0.008	0.009	0.008	0.008	0.014	0.007	0.016	0.007	0.01	0.009	0.007	0.007	0.009	0.01	0.008	0.011	0.011	0.016	0.013	0.006	0.001	0	0.001	0.004	0.019	0.001	0.003	0.005	0.003	0.005	0.004	0.003	0.006	0.031	0.008	0.008	0.02	0.015	0.023	0.018	0.017	0.024	0.027	0.023	0.022	0.02	0.046	0.07	0.027
Tibetan_Xunhua	0.003	0.003	0.002	0.003	0.008	0.002	0.01	0.002	0.005	0.004	0.004	0.002	0.005	0.003	0.003	0.007	0.005	0.01	0.007	0.003	0.003	0.001	0	0.005	0.017	0.002	0.003	0.005	0	0.005	0.004	0.003	0.004	0.027	0.006	0.008	0.014	0.01	0.018	0.012	0.012	0.018	0.02	0.018	0.015	0.014	0.04	0.064	0.024
Tibetan_Lhasa	0.013	0.013	0.013	0.013	0.018	0.012	0.022	0.012	0.016	0.014	0.015	0.012	0.014	0.015	0.013	0.015	0.016	0.021	0.017	0.009	0.002	0.004	0.005	0	0.021	0	0.006	0.001	0.007	0	0.008	0.006	0.008	0.037	0.01	0.005	0.026	0.02	0.028	0.024	0.022	0.029	0.032	0.028	0.027	0.025	0.05	0.076	0.033
Tibetan_Yunnan	0.023	0.024	0.022	0.023	0.028	0.023	0.029	0.023	0.026	0.024	0.024	0.023	0.025	0.025	0.024	0.025	0.025	0.03	0.028	0.023	0.018	0.019	0.017	0.021	0	0.019	0.018	0.023	0.019	0.022	0.018	0.018	0.019	0.043	0.021	0.025	0.034	0.028	0.036	0.032	0.031	0.038	0.039	0.037	0.034	0.033	0.06	0.084	0.049
Tibetan_Nagqu	0.01	0.011	0.01	0.01	0.016	0.009	0.018	0.009	0.013	0.012	0.012	0.009	0.011	0.012	0.01	0.013	0.013	0.018	0.015	0.007	0	0.001	0.002	0	0.019	0	0.001	0.001	0.003	0.001	0.003	0.003	0.005	0.033	0.008	0.003	0.023	0.017	0.025	0.02	0.02	0.027	0.029	0.026	0.024	0.023	0.048	0.073	0.032
Tibetan_Yajiang	0.008	0.008	0.008	0.008	0.013	0.008	0.014	0.008	0.01	0.01	0.008	0.007	0.009	0.009	0.008	0.009	0.01	0.015	0.013	0.006	0.001	0.003	0.003	0.006	0.018	0.001	0	0.007	0.002	0.007	0.003	0.002	0.005	0.03	0.007	0.007	0.019	0.014	0.022	0.017	0.016	0.024	0.026	0.023	0.02	0.019	0.046	0.07	0.032
Tibetan_Shigatse	0.014	0.014	0.013	0.013	0.019	0.013	0.021	0.012	0.017	0.014	0.016	0.013	0.015	0.015	0.014	0.016	0.016	0.022	0.018	0.011	0.004	0.005	0.005	0.001	0.023	0.001	0.007	0	0.007	0.001	0.009	0.006	0.01	0.036	0.012	0.004	0.025	0.021	0.028	0.024	0.022	0.029	0.033	0.029	0.027	0.025	0.052	0.076	0.034
Tibetan_Xinlong	0.002	0.003	0.003	0.003	0.005	0.003	0.007	0.003	0.003	0.003	0.002	0.003	0.003	0.003	0.002	0.002	0.004	0.008	0.007	0.004	0.004	0.003	0	0.007	0.019	0.003	0.002	0.007	0	0.008	0.002	0.002	0.003	0.024	0.004	0.008	0.013	0.008	0.015	0.009	0.009	0.015	0.017	0.014	0.012	0.011	0.036	0.061	0.029
Tibetan_Shannan	0.014	0.015	0.014	0.014	0.019	0.013	0.022	0.013	0.017	0.015	0.017	0.013	0.016	0.016	0.014	0.017	0.017	0.022	0.019	0.011	0.004	0.005	0.005	0	0.022	0.001	0.007	0.001	0.008	0	0.01	0.007	0.009	0.036	0.012	0.004	0.026	0.02	0.029	0.024	0.022	0.03	0.034	0.03	0.028	0.026	0.052	0.076	0.035
Qiang_Danba	0.007	0.007	0.006	0.006	0.01	0.007	0.012	0.005	0.008	0.007	0.006	0.006	0.006	0.008	0.007	0.008	0.008	0.013	0.011	0.006	0.004	0.004	0.004	0.008	0.018	0.003	0.003	0.009	0.002	0.01	0	0.003	0.004	0.029	0.006	0.011	0.016	0.011	0.019	0.014	0.013	0.02	0.024	0.019	0.017	0.016	0.042	0.067	0.033
Qiang_Daofu	0.007	0.008	0.007	0.007	0.011	0.007	0.013	0.005	0.009	0.008	0.008	0.006	0.008	0.009	0.008	0.009	0.009	0.014	0.011	0.005	0.002	0.003	0.003	0.006	0.018	0.003	0.002	0.006	0.002	0.007	0.003	0	0.005	0.03	0.007	0.009	0.018	0.013	0.021	0.016	0.014	0.021	0.024	0.021	0.019	0.018	0.044	0.068	0.032
Yi	0.006	0.006	0.006	0.006	0.009	0.006	0.011	0.005	0.007	0.006	0.005	0.005	0.006	0.006	0.006	0.006	0.007	0.011	0.01	0.006	0.005	0.006	0.004	0.008	0.019	0.005	0.005	0.01	0.003	0.009	0.004	0.005	0	0.025	0.005	0.012	0.016	0.01	0.016	0.012	0.011	0.017	0.02	0.016	0.015	0.013	0.039	0.065	0.033
China_Lahu	0.026	0.026	0.026	0.025	0.024	0.026	0.022	0.026	0.023	0.024	0.026	0.026	0.022	0.023	0.025	0.022	0.022	0.026	0.028	0.028	0.033	0.031	0.027	0.037	0.043	0.033	0.03	0.036	0.024	0.036	0.029	0.03	0.025	0	0.026	0.037	0.03	0.024	0.024	0.023	0.021	0.023	0.028	0.024	0.023	0.021	0.047	0.072	0.055
Naxi	0.007	0.008	0.007	0.008	0.011	0.008	0.012	0.006	0.008	0.007	0.007	0.006	0.008	0.008	0.007	0.007	0.008	0.013	0.011	0.008	0.008	0.008	0.006	0.01	0.021	0.008	0.007	0.012	0.004	0.012	0.006	0.007	0.005	0.026	0	0.012	0.017	0.013	0.018	0.013	0.013	0.019	0.022	0.018	0.016	0.015	0.042	0.066	0.035
Sherpa	0.015	0.015	0.015	0.014	0.02	0.014	0.023	0.014	0.017	0.016	0.016	0.015	0.017	0.017	0.015	0.016	0.017	0.023	0.02	0.012	0.006	0.008	0.008	0.005	0.025	0.003	0.007	0.004	0.008	0.004	0.011	0.009	0.012	0.037	0.012	0	0.027	0.021	0.029	0.025	0.024	0.03	0.035	0.03	0.029	0.026	0.052	0.077	0.037
She	0.01	0.011	0.011	0.01	0.008	0.012	0.009	0.012	0.008	0.01	0.01	0.01	0.008	0.009	0.011	0.009	0.008	0.011	0.013	0.014	0.023	0.02	0.014	0.026	0.034	0.023	0.019	0.025	0.013	0.026	0.016	0.018	0.016	0.03	0.017	0.027	0	0.011	0.017	0.01	0.01	0.014	0.016	0.013	0.012	0.01	0.035	0.059	0.043
Miao	0.007	0.008	0.007	0.007	0.006	0.009	0.005	0.007	0.005	0.007	0.007	0.007	0.004	0.005	0.007	0.005	0.005	0.009	0.01	0.011	0.018	0.015	0.01	0.02	0.028	0.017	0.014	0.021	0.008	0.02	0.011	0.013	0.01	0.024	0.013	0.021	0.011	0	0.011	0.006	0.004	0.01	0.012	0.009	0.009	0.007	0.032	0.058	0.039
Gelao	0.014	0.014	0.014	0.014	0.011	0.015	0.007	0.014	0.011	0.013	0.013	0.015	0.009	0.011	0.014	0.009	0.01	0.013	0.016	0.017	0.026	0.023	0.018	0.028	0.036	0.025	0.022	0.028	0.015	0.029	0.019	0.021	0.016	0.024	0.018	0.029	0.017	0.011	0	0.008	0.007	0.009	0.012	0.009	0.008	0.006	0.032	0.057	0.045
Dong_Guizhou	0.008	0.009	0.008	0.008	0.005	0.01	0.002	0.008	0.005	0.006	0.006	0.009	0.004	0.006	0.008	0.003	0.004	0.007	0.01	0.013	0.022	0.018	0.012	0.024	0.032	0.02	0.017	0.024	0.009	0.024	0.014	0.016	0.012	0.023	0.013	0.025	0.01	0.006	0.008	0	0.001	0.005	0.006	0.003	0.003	0.001	0.026	0.052	0.041
Dong_Hunan	0.007	0.008	0.007	0.007	0.004	0.009	0.001	0.007	0.005	0.005	0.005	0.007	0.003	0.004	0.007	0.002	0.003	0.006	0.009	0.01	0.02	0.017	0.012	0.022	0.031	0.02	0.016	0.022	0.009	0.022	0.013	0.014	0.011	0.021	0.013	0.024	0.01	0.004	0.007	0.001	0	0.004	0.007	0.003	0.003	0.001	0.027	0.051	0.04
Dai	0.013	0.014	0.014	0.013	0.009	0.015	0.005	0.012	0.008	0.012	0.012	0.014	0.008	0.009	0.014	0.008	0.008	0.011	0.015	0.017	0.027	0.024	0.018	0.029	0.038	0.027	0.024	0.029	0.015	0.03	0.02	0.021	0.017	0.023	0.019	0.03	0.014	0.01	0.009	0.005	0.004	0	0.006	0.005	0.005	0.003	0.027	0.052	0.045
Li	0.016	0.017	0.016	0.015	0.011	0.018	0.006	0.016	0.012	0.012	0.015	0.017	0.01	0.011	0.016	0.01	0.009	0.012	0.017	0.019	0.031	0.027	0.02	0.032	0.039	0.029	0.026	0.033	0.017	0.034	0.024	0.024	0.02	0.028	0.022	0.035	0.016	0.012	0.012	0.006	0.007	0.006	0	0.006	0.006	0.004	0.026	0.054	0.049
Maonan	0.013	0.013	0.013	0.013	0.008	0.014	0.005	0.013	0.008	0.01	0.01	0.013	0.007	0.009	0.013	0.007	0.008	0.01	0.014	0.016	0.027	0.023	0.018	0.028	0.037	0.026	0.023	0.029	0.014	0.03	0.019	0.021	0.016	0.024	0.018	0.03	0.013	0.009	0.009	0.003	0.003	0.005	0.006	0	0.004	0.002	0.027	0.053	0.046
Mulam	0.01	0.011	0.011	0.011	0.005	0.012	0.004	0.011	0.007	0.009	0.008	0.011	0.005	0.008	0.01	0.005	0.006	0.008	0.012	0.014	0.025	0.022	0.015	0.027	0.034	0.024	0.02	0.027	0.012	0.028	0.017	0.019	0.015	0.023	0.016	0.029	0.012	0.009	0.008	0.003	0.003	0.005	0.006	0.004	0	0.002	0.027	0.053	0.044
Zhuang	0.009	0.01	0.009	0.009	0.005	0.01	0.002	0.009	0.005	0.007	0.006	0.009	0.004	0.007	0.009	0.003	0.004	0.007	0.01	0.014	0.024	0.02	0.014	0.025	0.033	0.023	0.019	0.025	0.011	0.026	0.016	0.018	0.013	0.021	0.015	0.026	0.01	0.007	0.006	0.001	0.001	0.003	0.004	0.002	0.002	0	0.024	0.05	0.041
Ami	0.034	0.035	0.034	0.035	0.029	0.036	0.025	0.034	0.029	0.032	0.031	0.035	0.029	0.03	0.034	0.029	0.029	0.031	0.035	0.038	0.05	0.046	0.04	0.05	0.06	0.048	0.046	0.052	0.036	0.052	0.042	0.044	0.039	0.047	0.042	0.052	0.035	0.032	0.032	0.026	0.027	0.027	0.026	0.027	0.027	0.024	0	0.051	0.066
Atayal	0.059	0.06	0.06	0.059	0.053	0.061	0.051	0.059	0.054	0.056	0.057	0.06	0.054	0.056	0.06	0.054	0.054	0.056	0.061	0.062	0.075	0.07	0.064	0.076	0.084	0.073	0.07	0.076	0.061	0.076	0.067	0.068	0.065	0.072	0.066	0.077	0.059	0.058	0.057	0.052	0.051	0.052	0.054	0.053	0.053	0.05	0.051	0	0.089
Yakut	0.03	0.031	0.03	0.029	0.037	0.023	0.038	0.029	0.034	0.032	0.032	0.029	0.033	0.032	0.03	0.035	0.033	0.039	0.035	0.027	0.032	0.027	0.024	0.033	0.049	0.032	0.032	0.034	0.029	0.035	0.033	0.032	0.033	0.055	0.035	0.037	0.043	0.039	0.045	0.041	0.04	0.045	0.049	0.046	0.044	0.041	0.066	0.089	0
Oroqen	0.012	0.014	0.012	0.012	0.019	0.008	0.019	0.012	0.016	0.014	0.014	0.012	0.015	0.015	0.013	0.016	0.015	0.02	0.017	0.013	0.018	0.014	0.011	0.02	0.032	0.017	0.017	0.021	0.013	0.021	0.017	0.015	0.017	0.038	0.018	0.022	0.025	0.021	0.028	0.023	0.022	0.028	0.031	0.028	0.025	0.024	0.049	0.073	0.016
Manchu_Liaoning	0	0.001	0	0	0.003	0.001	0.005	0	0.001	0	0	0	0.001	0	0	0.002	0.001	0.006	0.004	0.004	0.011	0.008	0.003	0.013	0.023	0.011	0.008	0.014	0.003	0.014	0.007	0.007	0.006	0.026	0.008	0.015	0.011	0.007	0.014	0.008	0.007	0.014	0.016	0.013	0.011	0.009	0.035	0.059	0.03
Hezhen	0.01	0.01	0.01	0.01	0.015	0.007	0.017	0.01	0.013	0.01	0.011	0.01	0.012	0.012	0.009	0.013	0.013	0.017	0.014	0.011	0.017	0.013	0.01	0.019	0.033	0.017	0.016	0.021	0.011	0.021	0.015	0.015	0.015	0.035	0.016	0.021	0.022	0.018	0.026	0.02	0.019	0.025	0.028	0.025	0.022	0.021	0.046	0.071	0.021
Xibo	0.004	0.004	0.004	0.003	0.008	0.002	0.009	0.003	0.006	0.005	0.004	0.003	0.005	0.005	0.004	0.006	0.006	0.01	0.008	0.004	0.01	0.008	0.002	0.013	0.024	0.01	0.01	0.014	0.005	0.014	0.009	0.009	0.008	0.029	0.01	0.014	0.015	0.011	0.018	0.013	0.012	0.018	0.022	0.018	0.016	0.014	0.04	0.063	0.02
Nanai	0.021	0.022	0.02	0.021	0.027	0.015	0.028	0.02	0.025	0.023	0.023	0.021	0.023	0.023	0.021	0.025	0.024	0.029	0.026	0.021	0.027	0.022	0.02	0.029	0.041	0.025	0.026	0.03	0.022	0.03	0.025	0.025	0.025	0.048	0.027	0.03	0.034	0.03	0.037	0.032	0.03	0.038	0.04	0.037	0.035	0.033	0.059	0.083	0.022
Ulchi	0.025	0.026	0.024	0.024	0.031	0.019	0.033	0.024	0.028	0.026	0.026	0.025	0.028	0.027	0.025	0.028	0.028	0.033	0.03	0.025	0.03	0.026	0.023	0.032	0.046	0.029	0.03	0.033	0.026	0.033	0.029	0.028	0.03	0.05	0.031	0.034	0.038	0.034	0.041	0.036	0.035	0.04	0.044	0.041	0.039	0.037	0.061	0.085	0.025
Even	0.031	0.032	0.031	0.03	0.037	0.023	0.037	0.03	0.034	0.033	0.032	0.03	0.033	0.033	0.031	0.035	0.033	0.039	0.036	0.025	0.032	0.026	0.023	0.032	0.047	0.031	0.032	0.035	0.031	0.034	0.034	0.032	0.034	0.054	0.035	0.036	0.043	0.039	0.044	0.04	0.04	0.044	0.048	0.045	0.043	0.04	0.065	0.088	0.011
Evenk_Transbaikal	0.043	0.045	0.043	0.043	0.051	0.035	0.052	0.043	0.047	0.046	0.047	0.043	0.048	0.047	0.044	0.047	0.047	0.052	0.048	0.041	0.045	0.041	0.04	0.048	0.062	0.046	0.045	0.049	0.043	0.049	0.047	0.045	0.047	0.069	0.049	0.051	0.057	0.053	0.06	0.055	0.055	0.059	0.063	0.06	0.058	0.055	0.081	0.105	0.024
Evenk_FarEast	0.019	0.02	0.018	0.018	0.023	0.012	0.027	0.018	0.023	0.02	0.02	0.018	0.021	0.021	0.018	0.022	0.021	0.027	0.023	0.014	0.023	0.017	0.013	0.023	0.038	0.02	0.021	0.024	0.019	0.024	0.023	0.021	0.021	0.043	0.024	0.026	0.031	0.027	0.033	0.028	0.028	0.033	0.038	0.033	0.031	0.03	0.053	0.077	0.013
Daur	0.007	0.008	0.007	0.007	0.012	0.004	0.014	0.007	0.011	0.008	0.008	0.006	0.009	0.009	0.007	0.011	0.01	0.015	0.012	0.008	0.014	0.01	0.007	0.016	0.028	0.014	0.012	0.017	0.009	0.018	0.012	0.012	0.011	0.033	0.014	0.019	0.019	0.015	0.023	0.017	0.016	0.022	0.026	0.022	0.021	0.018	0.044	0.068	0.018
Mongola	0.001	0.002	0.001	0.001	0.006	0	0.007	0	0.002	0.002	0.004	0	0.003	0.002	0.001	0.003	0.003	0.008	0.006	0.002	0.008	0.006	0.003	0.012	0.024	0.009	0.008	0.012	0.003	0.013	0.007	0.007	0.008	0.027	0.008	0.013	0.012	0.01	0.016	0.01	0.009	0.016	0.018	0.015	0.013	0.011	0.036	0.061	0.022
Buryat	0.017	0.018	0.016	0.016	0.023	0.011	0.025	0.016	0.021	0.019	0.018	0.016	0.019	0.02	0.017	0.021	0.02	0.026	0.022	0.014	0.02	0.015	0.012	0.022	0.035	0.02	0.02	0.022	0.017	0.023	0.02	0.019	0.021	0.041	0.022	0.024	0.03	0.025	0.033	0.028	0.027	0.032	0.035	0.032	0.03	0.029	0.054	0.077	0.012
Dongxiang	0.004	0.005	0.004	0.003	0.008	0.003	0.008	0.003	0.006	0.004	0.004	0.003	0.004	0.004	0.004	0.005	0.005	0.01	0.008	0.002	0.009	0.006	0.002	0.01	0.024	0.009	0.006	0.011	0.003	0.012	0.007	0.007	0.006	0.026	0.009	0.012	0.013	0.009	0.016	0.01	0.011	0.016	0.018	0.015	0.013	0.012	0.037	0.062	0.024
Bonan	0.005	0.005	0.005	0.004	0.009	0.004	0.011	0.004	0.006	0.006	0.005	0.004	0.006	0.006	0.005	0.007	0.006	0.011	0.009	0.006	0.009	0.006	0.003	0.011	0.022	0.009	0.007	0.012	0.005	0.012	0.008	0.008	0.007	0.028	0.009	0.013	0.015	0.011	0.018	0.013	0.012	0.017	0.021	0.017	0.016	0.014	0.04	0.065	0.028
Tu	0.002	0.003	0.002	0.002	0.006	0.002	0.008	0.003	0.004	0.002	0.003	0.001	0.004	0.004	0.003	0.005	0.004	0.009	0.007	0.002	0.005	0.004	-0.001	0.007	0.02	0.006	0.004	0.008	0.002	0.008	0.004	0.004	0.004	0.025	0.006	0.009	0.013	0.008	0.016	0.011	0.009	0.016	0.02	0.015	0.014	0.012	0.038	0.062	0.025
Kyrgyz_China	0.019	0.02	0.019	0.019	0.025	0.013	0.026	0.018	0.023	0.02	0.02	0.018	0.022	0.022	0.019	0.023	0.021	0.027	0.024	0.013	0.021	0.016	0.012	0.023	0.037	0.02	0.02	0.024	0.019	0.024	0.023	0.021	0.022	0.042	0.023	0.024	0.032	0.027	0.032	0.028	0.028	0.032	0.035	0.032	0.031	0.029	0.053	0.076	0.018
Uyghur	0.028	0.029	0.027	0.027	0.032	0.022	0.034	0.027	0.03	0.029	0.028	0.026	0.029	0.03	0.027	0.03	0.029	0.034	0.032	0.019	0.029	0.022	0.019	0.029	0.044	0.027	0.027	0.031	0.026	0.03	0.031	0.028	0.029	0.048	0.031	0.031	0.038	0.034	0.039	0.034	0.034	0.037	0.04	0.039	0.037	0.035	0.059	0.081	0.029
Kazakh_China	0.019	0.02	0.018	0.019	0.025	0.013	0.026	0.018	0.023	0.021	0.02	0.017	0.02	0.022	0.019	0.022	0.021	0.026	0.023	0.014	0.021	0.015	0.012	0.021	0.035	0.019	0.019	0.022	0.017	0.022	0.021	0.019	0.021	0.041	0.023	0.024	0.031	0.027	0.033	0.028	0.027	0.033	0.036	0.033	0.031	0.029	0.054	0.077	0.019
Yugur	0.001	0.002	0.001	0.001	0.005	0.001	0.006	0	0.002	0.002	0.001	0	0.001	0.002	0.001	0.002	0.002	0.007	0.005	0.003	0.007	0.005	0.001	0.01	0.02	0.006	0.005	0.01	0.002	0.01	0.005	0.005	0.005	0.025	0.007	0.011	0.011	0.007	0.014	0.009	0.008	0.014	0.017	0.014	0.012	0.01	0.035	0.06	0.027
Salar	0.006	0.007	0.006	0.006	0.01	0.005	0.012	0.006	0.008	0.007	0.006	0.005	0.006	0.007	0.005	0.008	0.007	0.012	0.01	0.003	0.008	0.006	0.003	0.01	0.024	0.008	0.008	0.011	0.005	0.011	0.008	0.007	0.008	0.028	0.01	0.013	0.016	0.012	0.017	0.012	0.012	0.018	0.02	0.017	0.015	0.014	0.039	0.063	0.025
Korean	0.001	0.002	0.002	0.001	0.005	0.002	0.006	0.001	0.003	0.002	0	0.001	0.002	0.002	0.002	0.004	0.003	0.008	0.006	0.005	0.012	0.009	0.004	0.014	0.024	0.012	0.01	0.016	0.004	0.016	0.008	0.008	0.008	0.026	0.009	0.016	0.012	0.009	0.017	0.009	0.008	0.015	0.017	0.015	0.012	0.01	0.036	0.06	0.028
Japanese	0.007	0.007	0.007	0.007	0.01	0.007	0.011	0.006	0.009	0.007	0.007	0.007	0.007	0.008	0.007	0.009	0.008	0.012	0.011	0.011	0.017	0.014	0.009	0.019	0.03	0.017	0.015	0.02	0.01	0.021	0.014	0.014	0.013	0.032	0.014	0.021	0.017	0.014	0.02	0.015	0.013	0.019	0.021	0.019	0.017	0.015	0.038	0.064	0.031
[truncated: 22 more columns]
