# Supplementary material for: Genetic structure and demographic history of Northern Han people in Liaoning Province inferred from genome-wide array data
Source: Frontiers journal article supplement (doi:10.3389/fevo.2022.1014024), 2022-11-03
Supplement: Table_5.XLSX [file Table_5.XLSX]

## Sheet: A
Supplementary Table 5: The result of outgroup-f3 (Han_Liaoning, Modern population; Mbuti) based on 1240K merged dataset
Source 1	Source 2	Target	f_3	std. err	Z	SNPs
Han_Liaoning	Han.DG	Mbuti.DG	0.302774	0.003563	84.987	106725
Han_Liaoning	CHB.SG	Mbuti.DG	0.301863	0.003476	86.839	106725
Han_Liaoning	CHS.SG	Mbuti.DG	0.301774	0.003459	87.25	106725
Han_Liaoning	She.DG	Mbuti.DG	0.301461	0.003606	83.594	106699
Han_Liaoning	Manchu_Liaoning	Mbuti.DG	0.300605	0.003477	86.453	106701
Han_Liaoning	JPT.SG	Mbuti.DG	0.300138	0.003488	86.042	106725
Han_Liaoning	Korean.DG	Mbuti.DG	0.299913	0.003549	84.508	106716
Han_Liaoning	Miao.DG	Mbuti.DG	0.29968	0.003553	84.346	106717
Han_Liaoning	Tujia.DG	Mbuti.DG	0.299582	0.003673	81.568	106712
Han_Liaoning	Ami.DG	Mbuti.DG	0.299127	0.003607	82.939	106718
Han_Liaoning	Japanese.DG	Mbuti.DG	0.298302	0.003579	83.34	106719
Han_Liaoning	Yi.DG	Mbuti.DG	0.29828	0.003598	82.902	106717
Han_Liaoning	Naxi.DG	Mbuti.DG	0.298164	0.003517	84.771	106722
Han_Liaoning	Atayal.DG	Mbuti.DG	0.297216	0.003816	77.884	106545
Han_Liaoning	Mongolian_FX	Mbuti.DG	0.296267	0.003425	86.494	106725
Han_Liaoning	Igorot.DG	Mbuti.DG	0.296092	0.003586	82.574	106707
Han_Liaoning	Hezhen.DG	Mbuti.DG	0.295135	0.003631	81.292	106718
Han_Liaoning	Xibo.DG	Mbuti.DG	0.295133	0.003615	81.636	106716
Han_Liaoning	Kinh.DG	Mbuti.DG	0.294948	0.003592	82.102	106707
Han_Liaoning	Mongola.DG	Mbuti.DG	0.294921	0.003479	84.779	106717
Han_Liaoning	Daur.DG	Mbuti.DG	0.294851	0.003765	78.305	106456
Han_Liaoning	Dai.DG	Mbuti.DG	0.294587	0.00346	85.133	106725
Han_Liaoning	Oroqen.DG	Mbuti.DG	0.29391	0.003596	81.742	106710
Han_Liaoning	Ulchi.DG	Mbuti.DG	0.29285	0.003583	81.742	106711
Han_Liaoning	China_Lahu.DG	Mbuti.DG	0.292825	0.003585	81.683	106717
Han_Liaoning	Tu.DG	Mbuti.DG	0.291679	0.00356	81.937	106715
Han_Liaoning	Sherpa.DG	Mbuti.DG	0.291641	0.003613	80.721	106719
Han_Liaoning	Tibetan.DG	Mbuti.DG	0.288936	0.003495	82.663	106714
Han_Liaoning	Even.DG	Mbuti.DG	0.288583	0.003496	82.551	106724
Han_Liaoning	Thai.DG	Mbuti.DG	0.286288	0.003502	81.743	106708
Han_Liaoning	Buryat.SG	Mbuti.DG	0.285762	0.003478	82.152	106725
Han_Liaoning	Yakut.DG	Mbuti.DG	0.284729	0.003608	78.925	106707
Han_Liaoning	Surui.DG	Mbuti.DG	0.27762	0.003566	77.845	106714
Han_Liaoning	Altaian.DG	Mbuti.DG	0.27656	0.003472	79.651	106562
Han_Liaoning	Mixe.DG	Mbuti.DG	0.273233	0.00337	81.071	106721
Han_Liaoning	Uyghur.DG	Mbuti.DG	0.257858	0.003342	77.162	106715
Han_Liaoning	Australian.DG	Mbuti.DG	0.239606	0.00329	72.82	106691
Han_Liaoning	Papuan.DG	Mbuti.DG	0.236709	0.003167	74.749	106722
Han_Liaoning	Tajik.DG	Mbuti.DG	0.226213	0.003085	73.337	106718
Han_Liaoning	Turkish.DG	Mbuti.DG	0.221939	0.003186	69.667	106719
Han_Liaoning	French.DG	Mbuti.DG	0.221459	0.00298	74.324	106722
Han_Liaoning	English.DG	Mbuti.DG	0.219697	0.003079	71.344	106716
Han_Liaoning	Spanish.DG	Mbuti.DG	0.218121	0.003037	71.827	106708

## Sheet: B
Supplementary Table 5: The result of outgroup-f3 (Han_Liaoning, Modern population; Mbuti) based on HO merged dataset
Source 1	Source 2	Target	f_3	std. err	Z	SNPs
Han_Liaoning	Han_Shanghai	Mbuti	0.297867	0.003774	78.919	41147
Han_Liaoning	Han_Hubei	Mbuti	0.296826	0.003622	81.958	41147
Han_Liaoning	Han_Henan	Mbuti	0.295724	0.003566	82.926	41147
Han_Liaoning	Han_Fujian	Mbuti	0.295557	0.003526	83.831	41147
Han_Liaoning	CHB.SG	Mbuti	0.295421	0.003514	84.072	41191
Han_Liaoning	Han_Zhejiang	Mbuti	0.295124	0.0036	81.989	41147
Han_Liaoning	Han_Jiangsu	Mbuti	0.295059	0.003546	83.21	41147
Han_Liaoning	CHS.SG	Mbuti	0.295032	0.003497	84.376	41191
Han_Liaoning	Han_Chongqing	Mbuti	0.294944	0.003582	82.333	41147
Han_Liaoning	Han_Shandong	Mbuti	0.294491	0.003554	82.862	41147
Han_Liaoning	Manchu_Liaoning	Mbuti	0.294127	0.00348	84.511	41181
Han_Liaoning	She	Mbuti	0.293994	0.003548	82.852	41191
Han_Liaoning	Han_Shanxi	Mbuti	0.293899	0.003491	84.179	41147
Han_Liaoning	Korean	Mbuti	0.293881	0.00361	81.41	41191
Han_Liaoning	Han_Sichuan	Mbuti	0.2936	0.003558	82.527	41147
Han_Liaoning	Han_HGDP	Mbuti	0.293425	0.003472	84.513	41191
Han_Liaoning	Miao	Mbuti	0.293344	0.003538	82.906	41191
Han_Liaoning	Han_Guangdong	Mbuti	0.292934	0.003528	83.032	41147
Han_Liaoning	Dong_Guizhou	Mbuti	0.292399	0.003509	83.337	41147
Han_Liaoning	Japanese	Mbuti	0.292326	0.003509	83.303	41191
Han_Liaoning	Dong_Hunan	Mbuti	0.292196	0.003551	82.283	41147
Han_Liaoning	Qiang_Danba	Mbuti	0.291986	0.003472	84.106	41147
Han_Liaoning	Naxi	Mbuti	0.291323	0.003479	83.734	41191
Han_Liaoning	Tibetan_Xinlong	Mbuti	0.291266	0.003475	83.828	41147
Han_Liaoning	Maonan	Mbuti	0.291059	0.003491	83.379	41147
Han_Liaoning	Mulam	Mbuti	0.290996	0.003487	83.454	41147
Han_Liaoning	Zhuang	Mbuti	0.290848	0.003489	83.371	41147
Han_Liaoning	Qiang_Daofu	Mbuti	0.290614	0.003508	82.847	41147
Han_Liaoning	Xibo	Mbuti	0.290544	0.003577	81.223	41191
Han_Liaoning	Mongolian_FX	Mbuti	0.29014	0.00345	84.103	41191
Han_Liaoning	Yi	Mbuti	0.290062	0.003522	82.347	41191
Han_Liaoning	Li	Mbuti	0.290031	0.003491	83.078	41147
Han_Liaoning	Ami	Mbuti	0.290003	0.003539	81.948	41191
Han_Liaoning	Gelao	Mbuti	0.28975	0.003494	82.917	41147
Han_Liaoning	Tibetan_Yunnan	Mbuti	0.289682	0.003667	78.999	41147
Han_Liaoning	Yugur	Mbuti	0.289558	0.003473	83.373	41147
Han_Liaoning	Hezhen	Mbuti	0.289546	0.00355	81.571	41191
Han_Liaoning	Mongola	Mbuti	0.289486	0.003526	82.089	41191
Han_Liaoning	Daur	Mbuti	0.289119	0.003461	83.538	41191
Han_Liaoning	Oroqen	Mbuti	0.28899	0.003508	82.369	41191
Han_Liaoning	Nanai	Mbuti	0.288554	0.003522	81.937	41086
Han_Liaoning	Dai	Mbuti	0.288456	0.003521	81.922	41191
Han_Liaoning	Tibetan_Yajiang	Mbuti	0.288361	0.00343	84.065	41147
Han_Liaoning	Ulchi	Mbuti	0.288044	0.003514	81.962	41191
Han_Liaoning	China_Lahu	Mbuti	0.288037	0.003542	81.31	41191
Han_Liaoning	Atayal	Mbuti	0.287924	0.003531	81.539	41191
Han_Liaoning	Tibetan_Nagqu	Mbuti	0.287207	0.003507	81.886	41147
Han_Liaoning	Bonan	Mbuti	0.286894	0.003475	82.548	41147
Han_Liaoning	Tibetan_Chamdo	Mbuti	0.286601	0.003456	82.917	41147
Han_Liaoning	Tu	Mbuti	0.286263	0.003473	82.431	41191
Han_Liaoning	Tibetan_Shigatse	Mbuti	0.28582	0.003456	82.709	41147
Han_Liaoning	Sherpa	Mbuti	0.285651	0.003591	79.536	41147
Han_Liaoning	Tibetan_Lhasa	Mbuti	0.285595	0.003479	82.083	41147
Han_Liaoning	Tibetan_Shannan	Mbuti	0.285516	0.003438	83.058	41147
Han_Liaoning	Tibetan_Xunhua	Mbuti	0.285326	0.003524	80.966	41147
Han_Liaoning	Tibetan_Gannan	Mbuti	0.285212	0.003512	81.222	41147
Han_Liaoning	Tibetan_Gangcha	Mbuti	0.284385	0.003443	82.603	41147
Han_Liaoning	Dongxiang	Mbuti	0.282122	0.003407	82.818	41147
Han_Liaoning	Evenk_Transbaikal	Mbuti	0.280236	0.003473	80.68	41086
Han_Liaoning	Salar	Mbuti	0.27999	0.0034	82.338	41147
Han_Liaoning	Yakut	Mbuti	0.278244	0.003428	81.167	41191
Han_Liaoning	Buryat	Mbuti	0.277704	0.003365	82.52	41086
Han_Liaoning	Evenk_FarEast	Mbuti	0.275775	0.003433	80.326	41086
Han_Liaoning	Kazakh_China	Mbuti	0.267971	0.003321	80.681	41147
Han_Liaoning	Kyrgyz_China	Mbuti	0.264599	0.00329	80.413	41147
Han_Liaoning	Even	Mbuti	0.263672	0.003316	79.526	41191
Han_Liaoning	Kazakh	Mbuti	0.260167	0.003194	81.465	41086
Han_Liaoning	Uyghur	Mbuti	0.253486	0.003178	79.755	41191
Han_Liaoning	Uzbek	Mbuti	0.240381	0.003016	79.692	41191
Han_Liaoning	Tajik	Mbuti	0.224514	0.002918	76.946	41191
Han_Liaoning	Russian	Mbuti	0.218311	0.002968	73.565	41191
Han_Liaoning	Turkish	Mbuti	0.215195	0.002871	74.955	41191
Han_Liaoning	French	Mbuti	0.213699	0.002938	72.735	41191
Han_Liaoning	English	Mbuti	0.213658	0.003001	71.201	41191
Han_Liaoning	Spanish	Mbuti	0.211545	0.002916	72.541	41191
Han_Liaoning	Iranian	Mbuti	0.211456	0.002799	75.55	41191

## Sheet: C
Supplementary Table 5: The result of outgroup-f3 (Han_Dandong, Modern population; Mbuti) based on 1240K merged dataset
Source 1	Source 2	Target	f_3	std. err	Z	SNPs
Han_Dandong	Han.DG	Mbuti.DG	0.303635	0.003564	85.205	106496
Han_Dandong	CHB.SG	Mbuti.DG	0.302274	0.003481	86.843	106720
Han_Dandong	CHS.SG	Mbuti.DG	0.302191	0.003458	87.385	106718
Han_Dandong	She.DG	Mbuti.DG	0.301846	0.003632	83.098	106428
Han_Dandong	Han_Dalian	Mbuti.DG	0.301782	0.003507	86.057	106686
Han_Dandong	Manchu_Liaoning	Mbuti.DG	0.300986	0.003481	86.467	106701
Han_Dandong	Han_Shenyang	Mbuti.DG	0.300906	0.003514	85.639	106700
Han_Dandong	Han_Panjin	Mbuti.DG	0.300599	0.003479	86.408	106695
Han_Dandong	JPT.SG	Mbuti.DG	0.300569	0.003487	86.197	106711
Han_Dandong	Korean.DG	Mbuti.DG	0.300478	0.003551	84.622	106457
Han_Dandong	Miao.DG	Mbuti.DG	0.300218	0.003566	84.178	106454
Han_Dandong	Tujia.DG	Mbuti.DG	0.29962	0.003695	81.086	106469
Han_Dandong	Ami.DG	Mbuti.DG	0.299302	0.003612	82.87	106464
Han_Dandong	Japanese.DG	Mbuti.DG	0.298868	0.003585	83.359	106494
Han_Dandong	Naxi.DG	Mbuti.DG	0.298585	0.003519	84.841	106500
Han_Dandong	Yi.DG	Mbuti.DG	0.298437	0.003602	82.858	106461
Han_Dandong	Atayal.DG	Mbuti.DG	0.297619	0.003848	77.346	106253
Han_Dandong	Mongolian_FX	Mbuti.DG	0.296614	0.003427	86.551	106717
Han_Dandong	Igorot.DG	Mbuti.DG	0.296308	0.003595	82.415	106458
Han_Dandong	Daur.DG	Mbuti.DG	0.295856	0.003765	78.578	106174
Han_Dandong	Xibo.DG	Mbuti.DG	0.295385	0.003645	81.039	106450
Han_Dandong	Hezhen.DG	Mbuti.DG	0.2953	0.003636	81.21	106461
Han_Dandong	Mongola.DG	Mbuti.DG	0.295271	0.003479	84.883	106476
Han_Dandong	Kinh.DG	Mbuti.DG	0.295155	0.003605	81.867	106443
Han_Dandong	Dai.DG	Mbuti.DG	0.295037	0.003463	85.203	106552
Han_Dandong	Oroqen.DG	Mbuti.DG	0.294126	0.003601	81.69	106465
Han_Dandong	Ulchi.DG	Mbuti.DG	0.293062	0.00358	81.871	106457
Han_Dandong	China_Lahu.DG	Mbuti.DG	0.292796	0.003593	81.497	106458
Han_Dandong	Sherpa.DG	Mbuti.DG	0.292343	0.003627	80.608	106466
Han_Dandong	Tu.DG	Mbuti.DG	0.292325	0.003569	81.899	106476
Han_Dandong	Tibetan.DG	Mbuti.DG	0.289271	0.003509	82.447	106453
Han_Dandong	Even.DG	Mbuti.DG	0.288814	0.003508	82.328	106474
Han_Dandong	Thai.DG	Mbuti.DG	0.286672	0.003532	81.168	106449
Han_Dandong	Buryat.SG	Mbuti.DG	0.286104	0.003489	82.008	106485
Han_Dandong	Yakut.DG	Mbuti.DG	0.284907	0.003622	78.653	106461
Han_Dandong	Surui.DG	Mbuti.DG	0.278141	0.003563	78.058	106459
Han_Dandong	Altaian.DG	Mbuti.DG	0.276962	0.00349	79.354	106277
Han_Dandong	Mixe.DG	Mbuti.DG	0.273889	0.003363	81.446	106502
Han_Dandong	Uyghur.DG	Mbuti.DG	0.257997	0.003342	77.189	106505
Han_Dandong	Australian.DG	Mbuti.DG	0.240278	0.00332	72.367	106449
Han_Dandong	Papuan.DG	Mbuti.DG	0.237092	0.003182	74.517	106549
Han_Dandong	Tajik.DG	Mbuti.DG	0.226331	0.003105	72.889	106529
Han_Dandong	Turkish.DG	Mbuti.DG	0.222311	0.003199	69.497	106541
Han_Dandong	French.DG	Mbuti.DG	0.221462	0.002993	74.005	106569
Han_Dandong	English.DG	Mbuti.DG	0.22031	0.003104	70.985	106530
Han_Dandong	Spanish.DG	Mbuti.DG	0.217974	0.003054	71.379	106511

## Sheet: D
Supplementary Table 5: The result of outgroup-f3 (Han_Dalian, Modern population; Mbuti) based on 1240K merged dataset
Source 1	Source 2	Target	f_3	std. err	Z	SNPs
Han_Dalian	Han.DG	Mbuti.DG	0.303117	0.003605	84.083	106490
Han_Dalian	CHB.SG	Mbuti.DG	0.302467	0.003496	86.51	106722
Han_Dalian	She.DG	Mbuti.DG	0.302415	0.003625	83.417	106451
Han_Dalian	CHS.SG	Mbuti.DG	0.302385	0.003482	86.836	106719
Han_Dalian	Han_Dandong	Mbuti.DG	0.301782	0.003507	86.057	106686
Han_Dalian	Manchu_Liaoning	Mbuti.DG	0.301195	0.003498	86.094	106701
Han_Dalian	Han_Shenyang	Mbuti.DG	0.301026	0.003531	85.262	106677
Han_Dalian	Han_Panjin	Mbuti.DG	0.300868	0.003504	85.855	106688
Han_Dalian	JPT.SG	Mbuti.DG	0.30086	0.003501	85.947	106712
Han_Dalian	Tujia.DG	Mbuti.DG	0.300376	0.003688	81.441	106464
Han_Dalian	Korean.DG	Mbuti.DG	0.30031	0.003598	83.469	106469
Han_Dalian	Miao.DG	Mbuti.DG	0.299854	0.003576	83.852	106463
Han_Dalian	Ami.DG	Mbuti.DG	0.299727	0.003645	82.224	106474
Han_Dalian	Yi.DG	Mbuti.DG	0.299118	0.003616	82.714	106479
Han_Dalian	Japanese.DG	Mbuti.DG	0.299039	0.003589	83.311	106501
Han_Dalian	Naxi.DG	Mbuti.DG	0.298794	0.003552	84.109	106505
Han_Dalian	Atayal.DG	Mbuti.DG	0.297603	0.003853	77.233	106266
Han_Dalian	Igorot.DG	Mbuti.DG	0.296825	0.003604	82.368	106455
Han_Dalian	Mongolian_FX	Mbuti.DG	0.296737	0.003448	86.065	106719
Han_Dalian	Xibo.DG	Mbuti.DG	0.295687	0.003666	80.66	106468
Han_Dalian	Hezhen.DG	Mbuti.DG	0.295668	0.003648	81.049	106472
Han_Dalian	Dai.DG	Mbuti.DG	0.295456	0.003466	85.239	106544
Han_Dalian	Kinh.DG	Mbuti.DG	0.295291	0.003614	81.709	106457
Han_Dalian	Mongola.DG	Mbuti.DG	0.295223	0.003506	84.198	106474
Han_Dalian	Daur.DG	Mbuti.DG	0.295071	0.003785	77.963	106187
Han_Dalian	Oroqen.DG	Mbuti.DG	0.2945	0.003622	81.31	106496
Han_Dalian	China_Lahu.DG	Mbuti.DG	0.293473	0.003612	81.255	106476
Han_Dalian	Ulchi.DG	Mbuti.DG	0.29316	0.00362	80.985	106482
Han_Dalian	Tu.DG	Mbuti.DG	0.292355	0.0036	81.219	106472
Han_Dalian	Sherpa.DG	Mbuti.DG	0.291778	0.003644	80.076	106483
Han_Dalian	Tibetan.DG	Mbuti.DG	0.289396	0.003513	82.381	106490
Han_Dalian	Even.DG	Mbuti.DG	0.288778	0.003522	81.988	106504
Han_Dalian	Thai.DG	Mbuti.DG	0.286729	0.003511	81.665	106472
Han_Dalian	Buryat.SG	Mbuti.DG	0.286044	0.003493	81.888	106491
Han_Dalian	Yakut.DG	Mbuti.DG	0.284769	0.003611	78.867	106479
Han_Dalian	Altaian.DG	Mbuti.DG	0.277099	0.003495	79.28	106296
Han_Dalian	Surui.DG	Mbuti.DG	0.276932	0.003596	77.006	106492
Han_Dalian	Mixe.DG	Mbuti.DG	0.272934	0.003395	80.385	106498
Han_Dalian	Uyghur.DG	Mbuti.DG	0.257875	0.003362	76.711	106518
Han_Dalian	Australian.DG	Mbuti.DG	0.239575	0.003307	72.448	106472
Han_Dalian	Papuan.DG	Mbuti.DG	0.236873	0.003184	74.394	106582
Han_Dalian	Tajik.DG	Mbuti.DG	0.226376	0.003101	73.011	106549
Han_Dalian	Turkish.DG	Mbuti.DG	0.221843	0.003185	69.65	106547
Han_Dalian	French.DG	Mbuti.DG	0.22126	0.002992	73.957	106574
Han_Dalian	English.DG	Mbuti.DG	0.21925	0.003086	71.041	106538
Han_Dalian	Spanish.DG	Mbuti.DG	0.217844	0.003034	71.811	106540

## Sheet: E
Supplementary Table 5: The result of outgroup-f3 (Han_Shenyang, Modern population; Mbuti) based on 1240K merged dataset
Source 1	Source 2	Target	f_3	std. err	Z	SNPs
Han_Shenyang	Han.DG	Mbuti.DG	0.302626	0.003586	84.399	106476
Han_Shenyang	CHB.SG	Mbuti.DG	0.301461	0.003502	86.072	106722
Han_Shenyang	CHS.SG	Mbuti.DG	0.301396	0.003485	86.477	106719
Han_Shenyang	Han_Dalian	Mbuti.DG	0.301026	0.003531	85.262	106677
Han_Shenyang	She.DG	Mbuti.DG	0.300978	0.003624	83.051	106419
Han_Shenyang	Han_Dandong	Mbuti.DG	0.300906	0.003514	85.639	106700
Han_Shenyang	Manchu_Liaoning	Mbuti.DG	0.300205	0.003503	85.698	106701
Han_Shenyang	Han_Panjin	Mbuti.DG	0.300069	0.003495	85.848	106676
Han_Shenyang	JPT.SG	Mbuti.DG	0.299674	0.003522	85.083	106718
Han_Shenyang	Korean.DG	Mbuti.DG	0.299333	0.003591	83.364	106427
Han_Shenyang	Miao.DG	Mbuti.DG	0.29916	0.003574	83.697	106425
Han_Shenyang	Ami.DG	Mbuti.DG	0.299097	0.00363	82.4	106427
Han_Shenyang	Tujia.DG	Mbuti.DG	0.299077	0.00371	80.623	106435
Han_Shenyang	Yi.DG	Mbuti.DG	0.297992	0.00363	82.09	106425
Han_Shenyang	Japanese.DG	Mbuti.DG	0.297786	0.003622	82.227	106466
Han_Shenyang	Naxi.DG	Mbuti.DG	0.297719	0.003538	84.152	106472
Han_Shenyang	Atayal.DG	Mbuti.DG	0.296649	0.003843	77.194	106217
Han_Shenyang	Mongolian_FX	Mbuti.DG	0.295972	0.003452	85.749	106721
Han_Shenyang	Igorot.DG	Mbuti.DG	0.295667	0.003627	81.519	106420
Han_Shenyang	Kinh.DG	Mbuti.DG	0.294847	0.003603	81.843	106415
Han_Shenyang	Hezhen.DG	Mbuti.DG	0.294837	0.003667	80.4	106433
Han_Shenyang	Mongola.DG	Mbuti.DG	0.294833	0.003507	84.077	106435
Han_Shenyang	Xibo.DG	Mbuti.DG	0.294535	0.003631	81.123	106440
Han_Shenyang	Daur.DG	Mbuti.DG	0.294288	0.003807	77.306	106145
Han_Shenyang	Dai.DG	Mbuti.DG	0.293951	0.003493	84.162	106517
Han_Shenyang	Oroqen.DG	Mbuti.DG	0.293631	0.003646	80.525	106444
Han_Shenyang	Ulchi.DG	Mbuti.DG	0.292658	0.003613	81.007	106427
Han_Shenyang	China_Lahu.DG	Mbuti.DG	0.292328	0.003595	81.325	106429
Han_Shenyang	Tu.DG	Mbuti.DG	0.291249	0.003589	81.156	106440
Han_Shenyang	Sherpa.DG	Mbuti.DG	0.291142	0.003649	79.777	106450
Han_Shenyang	Tibetan.DG	Mbuti.DG	0.288949	0.003528	81.897	106430
Han_Shenyang	Even.DG	Mbuti.DG	0.288298	0.003533	81.598	106471
Han_Shenyang	Thai.DG	Mbuti.DG	0.285736	0.003534	80.847	106434
Han_Shenyang	Buryat.SG	Mbuti.DG	0.285616	0.003517	81.2	106452
Han_Shenyang	Yakut.DG	Mbuti.DG	0.284635	0.003653	77.921	106449
Han_Shenyang	Surui.DG	Mbuti.DG	0.277837	0.003616	76.829	106428
Han_Shenyang	Altaian.DG	Mbuti.DG	0.276194	0.003496	78.995	106265
Han_Shenyang	Mixe.DG	Mbuti.DG	0.273228	0.003394	80.495	106452
Han_Shenyang	Uyghur.DG	Mbuti.DG	0.258117	0.003362	76.778	106476
Han_Shenyang	Australian.DG	Mbuti.DG	0.239306	0.003324	71.995	106416
Han_Shenyang	Papuan.DG	Mbuti.DG	0.236794	0.003206	73.865	106519
Han_Shenyang	Tajik.DG	Mbuti.DG	0.22612	0.003107	72.789	106507
Han_Shenyang	Turkish.DG	Mbuti.DG	0.222044	0.003226	68.821	106488
Han_Shenyang	French.DG	Mbuti.DG	0.221822	0.003019	73.471	106537
Han_Shenyang	English.DG	Mbuti.DG	0.219911	0.003102	70.902	106502
Han_Shenyang	Spanish.DG	Mbuti.DG	0.218429	0.00309	70.693	106499

## Sheet: F
Supplementary Table 5: The result of outgroup-f3 (Han_Panjin, Modern population; Mbuti) based on 1240K merged dataset
Source 1	Source 2	Target	f_3	std. err	Z	SNPs
Han_Panjin	Han.DG	Mbuti.DG	0.301693	0.003556	84.852	106487
Han_Panjin	CHB.SG	Mbuti.DG	0.301198	0.003468	86.848	106719
Han_Panjin	CHS.SG	Mbuti.DG	0.301075	0.003453	87.182	106722
Han_Panjin	She.DG	Mbuti.DG	0.300534	0.003608	83.291	106433
Han_Panjin	Manchu_Liaoning	Mbuti.DG	0.299984	0.003468	86.498	106701
Han_Panjin	Korean.DG	Mbuti.DG	0.299483	0.003522	85.027	106471
Han_Panjin	Miao.DG	Mbuti.DG	0.299454	0.003559	84.143	106446
Han_Panjin	JPT.SG	Mbuti.DG	0.299392	0.003488	85.84	106717
Han_Panjin	Tujia.DG	Mbuti.DG	0.299189	0.003661	81.734	106453
Han_Panjin	Ami.DG	Mbuti.DG	0.298349	0.00361	82.644	106458
Han_Panjin	Yi.DG	Mbuti.DG	0.297515	0.003608	82.468	106470
Han_Panjin	Naxi.DG	Mbuti.DG	0.297503	0.003517	84.581	106503
Han_Panjin	Japanese.DG	Mbuti.DG	0.297451	0.003579	83.11	106482
Han_Panjin	Atayal.DG	Mbuti.DG	0.296945	0.003811	77.912	106263
Han_Panjin	Mongolian_FX	Mbuti.DG	0.295707	0.003417	86.543	106715
Han_Panjin	Igorot.DG	Mbuti.DG	0.295512	0.003591	82.283	106439
Han_Panjin	Xibo.DG	Mbuti.DG	0.294865	0.003582	82.321	106463
Han_Panjin	Kinh.DG	Mbuti.DG	0.294477	0.003612	81.527	106427
Han_Panjin	Mongola.DG	Mbuti.DG	0.294339	0.00349	84.344	106463
Han_Panjin	Daur.DG	Mbuti.DG	0.29415	0.003789	77.63	106167
Han_Panjin	Dai.DG	Mbuti.DG	0.293829	0.003473	84.595	106547
Han_Panjin	Oroqen.DG	Mbuti.DG	0.293339	0.00358	81.927	106483
Han_Panjin	China_Lahu.DG	Mbuti.DG	0.292645	0.003603	81.221	106467
Han_Panjin	Ulchi.DG	Mbuti.DG	0.292496	0.003581	81.671	106479
Han_Panjin	Sherpa.DG	Mbuti.DG	0.291268	0.003602	80.865	106463
Han_Panjin	Tu.DG	Mbuti.DG	0.290731	0.003546	81.978	106476
Han_Panjin	Even.DG	Mbuti.DG	0.288416	0.003488	82.678	106497
Han_Panjin	Tibetan.DG	Mbuti.DG	0.288105	0.003496	82.418	106477
Han_Panjin	Thai.DG	Mbuti.DG	0.285964	0.003494	81.853	106468
Han_Panjin	Buryat.SG	Mbuti.DG	0.285261	0.003472	82.152	106488
Han_Panjin	Yakut.DG	Mbuti.DG	0.284596	0.00361	78.842	106481
Han_Panjin	Surui.DG	Mbuti.DG	0.277617	0.003575	77.651	106455
Han_Panjin	Altaian.DG	Mbuti.DG	0.275939	0.003492	79.029	106279
Han_Panjin	Mixe.DG	Mbuti.DG	0.272897	0.003403	80.201	106502
Han_Panjin	Uyghur.DG	Mbuti.DG	0.257454	0.003363	76.549	106504
Han_Panjin	Australian.DG	Mbuti.DG	0.239253	0.003289	72.746	106454
Han_Panjin	Papuan.DG	Mbuti.DG	0.236072	0.00316	74.699	106558
Han_Panjin	Tajik.DG	Mbuti.DG	0.226013	0.003091	73.11	106546
Han_Panjin	Turkish.DG	Mbuti.DG	0.221567	0.003194	69.363	106541
Han_Panjin	French.DG	Mbuti.DG	0.22132	0.002978	74.309	106563
Han_Panjin	English.DG	Mbuti.DG	0.21935	0.00309	70.989	106541
Han_Panjin	Spanish.DG	Mbuti.DG	0.218265	0.003037	71.874	106534
Han_Panjin	Hezhen.DG	Mbuti.DG	0.294692	0.003634	81.084	106469
Han_Panjin	Han_Dandong	Mbuti.DG	0.300599	0.003479	86.408	106695
Han_Panjin	Han_Dalian	Mbuti.DG	0.300868	0.003504	85.855	106688
Han_Panjin	Han_Shenyang	Mbuti.DG	0.300069	0.003495	85.848	106676

## Sheet: G
Supplementary Table 5: The result of outgroup-f3 (Han_Liaoning, Ancient population; Mbuti) based on 1240K merged dataset
Source 1	Source 2	Target	f_3	std. err	Z	SNPs
Han_Liaoning	China_YR_MN	Mbuti.DG	0.301664	0.00359	84.031	105984
Han_Liaoning	China_WLR_LN	Mbuti.DG	0.301453	0.003809	79.141	87910
Han_Liaoning	China_YR_LBIA	Mbuti.DG	0.301073	0.003524	85.425	105905
Han_Liaoning	China_YR_LN	Mbuti.DG	0.300936	0.003555	84.652	106599
Han_Liaoning	China_Upper_YR_LN	Mbuti.DG	0.300331	0.003529	85.111	105597
Han_Liaoning	China_Shimao_LN	Mbuti.DG	0.300206	0.003638	82.531	105376
Han_Liaoning	Taiwan_Gongguan	Mbuti.DG	0.300103	0.004207	71.337	66597
Han_Liaoning	China_Upper_YR_IA	Mbuti.DG	0.299233	0.00368	81.309	102482
Han_Liaoning	Russia_EarlyMedieval_Heshui_Mohe_1	Mbuti.DG	0.299016	0.005579	53.6	29689
Han_Liaoning	China_WLR_BA	Mbuti.DG	0.298217	0.00434	68.716	57558
Han_Liaoning	China_NEastAsia_Coastal_EN	Mbuti.DG	0.298124	0.003619	82.371	98142
Han_Liaoning	China_WLR_MN	Mbuti.DG	0.297728	0.003783	78.707	105888
Han_Liaoning	China_AmurRiver_N	Mbuti.DG	0.297156	0.003754	79.15	82943
Han_Liaoning	China_Miaozigou_MN	Mbuti.DG	0.297125	0.005035	59.007	31300
Han_Liaoning	China_AmurRiver_EarlyN	Mbuti.DG	0.296809	0.003967	74.816	75210
Han_Liaoning	Taiwan_Hanben_IA	Mbuti.DG	0.296308	0.003462	85.598	105977
Han_Liaoning	Russia_MN_Boisman	Mbuti.DG	0.296016	0.003581	82.663	95632
Han_Liaoning	Russia_DevilsCave_N.SG	Mbuti.DG	0.295755	0.003569	82.872	106682
Han_Liaoning	Mongolia_Khentii_Xiongnu	Mbuti.DG	0.295097	0.003821	77.23	87498
Han_Liaoning	China_AR_EN	Mbuti.DG	0.294338	0.005082	57.919	34127
Han_Liaoning	Nepal_Mebrak_2125BP.SG	Mbuti.DG	0.294281	0.004225	69.65	70324
Han_Liaoning	China_AmurRiver_Mesolithic	Mbuti.DG	0.294021	0.003966	74.133	70905
Han_Liaoning	China_AR_Xianbei_IA	Mbuti.DG	0.293976	0.00533	55.153	26867
Han_Liaoning	Mongolia_Tuv_Xiongnu	Mbuti.DG	0.293785	0.003837	76.558	94697
Han_Liaoning	Mongolia_Tuv_LatEMedieval	Mbuti.DG	0.293734	0.003708	79.211	93743
Han_Liaoning	Mongolia_East_N	Mbuti.DG	0.29313	0.003614	81.099	92959
Han_Liaoning	China_SEastAsia_Coastal_LN	Mbuti.DG	0.293047	0.004106	71.367	64036
Han_Liaoning	China_NEastAsia_Inland_EN	Mbuti.DG	0.292899	0.004077	71.844	81532
Han_Liaoning	Vietnam_BA	Mbuti.DG	0.291863	0.005302	55.05	33074
Han_Liaoning	China_AmurRiver_LPaleolithic	Mbuti.DG	0.291094	0.003813	76.351	83931
Han_Liaoning	Mongolia_EIA_SlabGrave_1	Mbuti.DG	0.290577	0.003433	84.64	103312
Han_Liaoning	Mongolia_North_N	Mbuti.DG	0.290373	0.00347	83.678	99342
Han_Liaoning	Nepal_Chokhopani_2800BP.SG	Mbuti.DG	0.290337	0.003799	76.423	106500
Han_Liaoning	Nepal_Samdzong_1500BP.SG	Mbuti.DG	0.289746	0.003528	82.13	106674
Han_Liaoning	Russia_Buryatia_Xiongnu	Mbuti.DG	0.289539	0.003506	82.588	100521
Han_Liaoning	Mongolia_Bulgan_Xiongnu	Mbuti.DG	0.288665	0.003584	80.551	93573
Han_Liaoning	Mongolia_EIA_Xiongnu_7	Mbuti.DG	0.287886	0.004092	70.35	77462
Han_Liaoning	Mongolia_LBA_CenterWest_4	Mbuti.DG	0.281302	0.0034	82.727	101253
Han_Liaoning	Vietnam_N	Mbuti.DG	0.280133	0.005233	53.531	24846
Han_Liaoning	Mongolia_EBA_Ulgii_1	Mbuti.DG	0.278142	0.003551	78.32	95364
Han_Liaoning	China_SEastAsia_Coastal_EN	Mbuti.DG	0.277749	0.005414	51.303	31601
Han_Liaoning	Mongolia_LBA_Khovsgol_6	Mbuti.DG	0.276645	0.003344	82.729	104553
Han_Liaoning	Japan_Jomon.SG	Mbuti.DG	0.272585	0.003968	68.698	83463
Han_Liaoning	China_Xinjian_IA.SG	Mbuti.DG	0.25605	0.003677	69.645	75015
Han_Liaoning	Mongolia_LBA_MongunTaiga_3	Mbuti.DG	0.252718	0.00348	72.612	94563
Han_Liaoning	Mongolia_EIA_Sagly_4	Mbuti.DG	0.252246	0.00313	80.587	104040
Han_Liaoning	Mongolia_EIA_2	Mbuti.DG	0.248367	0.003937	63.089	76821
Han_Liaoning	Mongolia_EIA_Pazyryk_6	Mbuti.DG	0.247978	0.003661	67.73	78494
Han_Liaoning	Mongolia_Uvs_EIAXiongnuLateMedival	Mbuti.DG	0.247822	0.003162	78.371	103803
Han_Liaoning	Mongolia_LBA_CenterWest_5	Mbuti.DG	0.247339	0.003377	73.241	98939
Han_Liaoning	China_AmurRiver_Paleolithic	Mbuti.DG	0.245911	0.003785	64.961	93374
Han_Liaoning	China_Tianyuan	Mbuti.DG	0.245085	0.003767	65.056	83540
Han_Liaoning	Mongolia_Arkhangai_Xiongnu	Mbuti.DG	0.239692	0.003174	75.527	103208
Han_Liaoning	Laos_Hoabinhian.SG	Mbuti.DG	0.237437	0.0044	53.966	41405
Han_Liaoning	Mongolia_Arkhangai_XiongnuEarlyMedieval_2	Mbuti.DG	0.232921	0.003406	68.379	84357
Han_Liaoning	Russia_Samara_EBA_Yamnaya	Mbuti.DG	0.225376	0.003053	73.811	102302
Han_Liaoning	Russia_Andronovo.SG	Mbuti.DG	0.225016	0.003219	69.913	105814
Han_Liaoning	Luxembourg_Loschbour.DG	Mbuti.DG	0.224565	0.003402	66.019	100265
Han_Liaoning	Russia_Afanasievo	Mbuti.DG	0.224208	0.002947	76.078	104729
Han_Liaoning	Russia_Caucasus_EBA_Yamnaya	Mbuti.DG	0.224017	0.003433	65.255	72359
Han_Liaoning	Russia_MLBA_Sintashta	Mbuti.DG	0.222624	0.002942	75.67	105214
Han_Liaoning	Russia_Kalmykia_EBA_Yamnaya.SG	Mbuti.DG	0.222314	0.003083	72.106	102094
Han_Liaoning	Ukraine_EBA_Yamnaya	Mbuti.DG	0.221724	0.003633	61.036	77089
Han_Liaoning	Russia_Alan.SG	Mbuti.DG	0.220682	0.003137	70.351	105974
Han_Liaoning	Iran_Hasanlu_IA.SG	Mbuti.DG	0.218075	0.003495	62.403	91855
Han_Liaoning	Hungary_LateC_EBA_Baden_Yamnaya	Mbuti.DG	0.217101	0.003341	64.973	83004
Han_Liaoning	Iran_Wezmeh_N.SG	Mbuti.DG	0.212692	0.003207	66.315	106638
Han_Liaoning	Iran_TepeAbdulHosein_N.SG	Mbuti.DG	0.212388	0.00316	67.212	98436
Han_Liaoning	Iran_GanjDareh_N	Mbuti.DG	0.21176	0.003004	70.5	99381

## Sheet: H
Supplementary Table 5: The result of outgroup-f3 (Han_Dandong, Ancient population; Mbuti) based on 1240K merged dataset
Source 1	Source 2	Target	f_3	std. err	Z	SNPs
Han_Dandong	China_WLR_LN	Mbuti.DG	0.301561	0.003841	78.514	87662
Han_Dandong	China_YR_LBIA	Mbuti.DG	0.301554	0.003528	85.466	105654
Han_Dandong	China_YR_MN	Mbuti.DG	0.301366	0.003588	83.988	105701
Han_Dandong	China_YR_LN	Mbuti.DG	0.30133	0.003562	84.603	106354
Han_Dandong	Taiwan_Gongguan	Mbuti.DG	0.300811	0.004202	71.584	66396
Han_Dandong	China_Shimao_LN	Mbuti.DG	0.300704	0.003655	82.28	105089
Han_Dandong	China_Upper_YR_LN	Mbuti.DG	0.300452	0.003535	84.987	105332
Han_Dandong	China_Upper_YR_IA	Mbuti.DG	0.299598	0.003707	80.826	102201
Han_Dandong	Russia_EarlyMedieval_Heshui_Mohe_1	Mbuti.DG	0.299043	0.005588	53.519	29607
Han_Dandong	China_NEastAsia_Coastal_EN	Mbuti.DG	0.298589	0.00364	82.04	97895
Han_Dandong	China_WLR_BA	Mbuti.DG	0.298548	0.004345	68.708	57402
Han_Dandong	China_WLR_MN	Mbuti.DG	0.298073	0.003795	78.535	105595
Han_Dandong	China_Miaozigou_MN	Mbuti.DG	0.298064	0.005039	59.152	31217
Han_Dandong	China_AmurRiver_EarlyN	Mbuti.DG	0.297689	0.003987	74.668	74998
Han_Dandong	China_AmurRiver_N	Mbuti.DG	0.297401	0.003736	79.597	82743
Han_Dandong	Taiwan_Hanben_IA	Mbuti.DG	0.296669	0.003463	85.662	105816
Han_Dandong	Russia_DevilsCave_N.SG	Mbuti.DG	0.296315	0.003577	82.84	106401
Han_Dandong	Russia_MN_Boisman	Mbuti.DG	0.296253	0.003581	82.725	95406
Han_Dandong	Mongolia_Khentii_Xiongnu	Mbuti.DG	0.295753	0.00383	77.217	87234
Han_Dandong	Mongolia_Tuv_LatEMedieval	Mbuti.DG	0.294568	0.003716	79.276	93492
Han_Dandong	China_AR_EN	Mbuti.DG	0.29446	0.005079	57.981	34036
Han_Dandong	Nepal_Mebrak_2125BP.SG	Mbuti.DG	0.294407	0.004251	69.25	70116
Han_Dandong	China_AmurRiver_Mesolithic	Mbuti.DG	0.294291	0.003974	74.057	70717
Han_Dandong	Mongolia_Tuv_Xiongnu	Mbuti.DG	0.294234	0.003852	76.377	94421
Han_Dandong	China_SEastAsia_Coastal_LN	Mbuti.DG	0.294071	0.004129	71.226	63866
Han_Dandong	China_AR_Xianbei_IA	Mbuti.DG	0.294049	0.005355	54.911	26789
Han_Dandong	Mongolia_East_N	Mbuti.DG	0.293751	0.003604	81.497	92699
Han_Dandong	Vietnam_BA	Mbuti.DG	0.293218	0.005371	54.597	32971
Han_Dandong	China_NEastAsia_Inland_EN	Mbuti.DG	0.292935	0.00411	71.269	81297
Han_Dandong	China_AmurRiver_LPaleolithic	Mbuti.DG	0.291541	0.003814	76.443	83714
Han_Dandong	Mongolia_EIA_SlabGrave_1	Mbuti.DG	0.29091	0.003414	85.214	103129
Han_Dandong	Mongolia_North_N	Mbuti.DG	0.290713	0.003472	83.732	99103
Han_Dandong	Nepal_Chokhopani_2800BP.SG	Mbuti.DG	0.290556	0.003829	75.885	106197
Han_Dandong	Nepal_Samdzong_1500BP.SG	Mbuti.DG	0.290079	0.003537	82.022	106421
Han_Dandong	Russia_Buryatia_Xiongnu	Mbuti.DG	0.289591	0.003505	82.618	100287
Han_Dandong	Mongolia_Bulgan_Xiongnu	Mbuti.DG	0.288562	0.003588	80.414	93316
Han_Dandong	Mongolia_EIA_Xiongnu_7	Mbuti.DG	0.288405	0.004106	70.234	77239
Han_Dandong	Mongolia_LBA_CenterWest_4	Mbuti.DG	0.281459	0.003401	82.751	101048
Han_Dandong	Vietnam_N	Mbuti.DG	0.279874	0.005271	53.095	24769
Han_Dandong	Mongolia_EBA_Ulgii_1	Mbuti.DG	0.278352	0.003551	78.39	95135
Han_Dandong	Mongolia_LBA_Khovsgol_6	Mbuti.DG	0.277061	0.003347	82.772	104374
Han_Dandong	China_SEastAsia_Coastal_EN	Mbuti.DG	0.276686	0.005442	50.84	31503
Han_Dandong	Japan_Jomon.SG	Mbuti.DG	0.273088	0.003996	68.337	83223
Han_Dandong	China_Xinjian_IA.SG	Mbuti.DG	0.256968	0.003712	69.229	74820
Han_Dandong	Mongolia_LBA_MongunTaiga_3	Mbuti.DG	0.252887	0.003485	72.573	94353
Han_Dandong	Mongolia_EIA_Sagly_4	Mbuti.DG	0.252289	0.003122	80.807	103924
Han_Dandong	Mongolia_EIA_2	Mbuti.DG	0.248324	0.003953	62.816	76611
Han_Dandong	Mongolia_EIA_Pazyryk_6	Mbuti.DG	0.248198	0.003698	67.121	78286
Han_Dandong	Mongolia_Uvs_EIAXiongnuLateMedival	Mbuti.DG	0.248072	0.003168	78.295	103619
Han_Dandong	Mongolia_LBA_CenterWest_5	Mbuti.DG	0.247458	0.003403	72.712	98695
Han_Dandong	China_AmurRiver_Paleolithic	Mbuti.DG	0.2459	0.003821	64.354	93125
Han_Dandong	China_Tianyuan	Mbuti.DG	0.245092	0.003789	64.682	83318
Han_Dandong	Mongolia_Arkhangai_Xiongnu	Mbuti.DG	0.23985	0.003185	75.315	103007
Han_Dandong	Laos_Hoabinhian.SG	Mbuti.DG	0.236992	0.004433	53.461	41295
Han_Dandong	Mongolia_Arkhangai_XiongnuEarlyMedieval_2	Mbuti.DG	0.233047	0.003409	68.364	84158
Han_Dandong	Russia_Samara_EBA_Yamnaya	Mbuti.DG	0.225686	0.003063	73.671	102126
Han_Dandong	Russia_Andronovo.SG	Mbuti.DG	0.224903	0.003229	69.659	105591
Han_Dandong	Luxembourg_Loschbour.DG	Mbuti.DG	0.224434	0.003391	66.177	100024
Han_Dandong	Russia_Afanasievo	Mbuti.DG	0.224257	0.00295	76.017	104615
Han_Dandong	Russia_Caucasus_EBA_Yamnaya	Mbuti.DG	0.224043	0.003433	65.268	72192
Han_Dandong	Russia_MLBA_Sintashta	Mbuti.DG	0.222587	0.002945	75.57	105090
Han_Dandong	Russia_Kalmykia_EBA_Yamnaya.SG	Mbuti.DG	0.222379	0.00309	71.957	101889
Han_Dandong	Ukraine_EBA_Yamnaya	Mbuti.DG	0.221426	0.003621	61.155	76898
Han_Dandong	Russia_Alan.SG	Mbuti.DG	0.220702	0.003146	70.145	105772
Han_Dandong	Iran_Hasanlu_IA.SG	Mbuti.DG	0.217972	0.003529	61.765	91604
Han_Dandong	Hungary_LateC_EBA_Baden_Yamnaya	Mbuti.DG	0.216976	0.00334	64.955	82816
Han_Dandong	Iran_Wezmeh_N.SG	Mbuti.DG	0.213306	0.003233	65.979	106368
Han_Dandong	Iran_TepeAbdulHosein_N.SG	Mbuti.DG	0.212481	0.003183	66.765	98204
Han_Dandong	Iran_GanjDareh_N	Mbuti.DG	0.211569	0.003009	70.324	99196

## Sheet: I
Supplementary Table 5: The result of outgroup-f3 (Han_Dalian, Ancient population; Mbuti) based on 1240K merged dataset
Source 1	Source 2	Target	f_3	std. err	Z	SNPs
Han_Dalian	China_WLR_LN	Mbuti.DG	0.302481	0.003848	78.598	87679
Han_Dalian	China_YR_MN	Mbuti.DG	0.302149	0.003625	83.347	105716
Han_Dalian	China_YR_LN	Mbuti.DG	0.301721	0.003586	84.146	106364
Han_Dalian	China_YR_LBIA	Mbuti.DG	0.301666	0.003543	85.137	105657
Han_Dalian	China_Upper_YR_LN	Mbuti.DG	0.301223	0.003557	84.687	105343
Han_Dalian	Taiwan_Gongguan	Mbuti.DG	0.300989	0.004267	70.547	66405
Han_Dalian	China_Shimao_LN	Mbuti.DG	0.300278	0.003642	82.445	105092
Han_Dalian	China_Upper_YR_IA	Mbuti.DG	0.300082	0.003687	81.385	102215
Han_Dalian	Russia_EarlyMedieval_Heshui_Mohe_1	Mbuti.DG	0.29992	0.005676	52.837	29611
Han_Dalian	China_WLR_MN	Mbuti.DG	0.298846	0.003826	78.107	105603
Han_Dalian	China_WLR_BA	Mbuti.DG	0.298784	0.004377	68.26	57398
Han_Dalian	China_NEastAsia_Coastal_EN	Mbuti.DG	0.298725	0.003657	81.692	97902
Han_Dalian	China_AmurRiver_N	Mbuti.DG	0.297888	0.003783	78.741	82762
Han_Dalian	China_Miaozigou_MN	Mbuti.DG	0.297774	0.005118	58.183	31210
Han_Dalian	China_AmurRiver_EarlyN	Mbuti.DG	0.297291	0.004004	74.25	75013
Han_Dalian	Taiwan_Hanben_IA	Mbuti.DG	0.296768	0.003472	85.469	105816
Han_Dalian	Russia_MN_Boisman	Mbuti.DG	0.296073	0.003629	81.582	95400
Han_Dalian	Russia_DevilsCave_N.SG	Mbuti.DG	0.296002	0.003611	81.969	106413
Han_Dalian	Mongolia_Khentii_Xiongnu	Mbuti.DG	0.295547	0.003882	76.125	87252
Han_Dalian	Nepal_Mebrak_2125BP.SG	Mbuti.DG	0.294964	0.004252	69.376	70146
Han_Dalian	China_AmurRiver_Mesolithic	Mbuti.DG	0.294766	0.004001	73.673	70730
Han_Dalian	China_AR_EN	Mbuti.DG	0.294666	0.005148	57.237	34032
Han_Dalian	Mongolia_Tuv_LatEMedieval	Mbuti.DG	0.294131	0.003749	78.461	93514
Han_Dalian	China_AR_Xianbei_IA	Mbuti.DG	0.293889	0.00538	54.622	26798
Han_Dalian	Mongolia_Tuv_Xiongnu	Mbuti.DG	0.293592	0.003868	75.912	94452
Han_Dalian	China_SEastAsia_Coastal_LN	Mbuti.DG	0.293303	0.00413	71.022	63871
Han_Dalian	Mongolia_East_N	Mbuti.DG	0.293202	0.00365	80.337	92717
Han_Dalian	China_NEastAsia_Inland_EN	Mbuti.DG	0.29271	0.004135	70.781	81308
Han_Dalian	China_AmurRiver_LPaleolithic	Mbuti.DG	0.291925	0.003854	75.755	83706
Han_Dalian	Vietnam_BA	Mbuti.DG	0.291755	0.005371	54.322	32968
Han_Dalian	Mongolia_EIA_SlabGrave_1	Mbuti.DG	0.290838	0.003467	83.881	103138
Han_Dalian	Nepal_Chokhopani_2800BP.SG	Mbuti.DG	0.290803	0.003832	75.892	106206
Han_Dalian	Mongolia_North_N	Mbuti.DG	0.290606	0.003508	82.848	99124
Han_Dalian	Nepal_Samdzong_1500BP.SG	Mbuti.DG	0.290221	0.003537	82.058	106418
Han_Dalian	Russia_Buryatia_Xiongnu	Mbuti.DG	0.289476	0.00354	81.767	100297
Han_Dalian	Mongolia_Bulgan_Xiongnu	Mbuti.DG	0.289433	0.003628	79.774	93341
Han_Dalian	Mongolia_EIA_Xiongnu_7	Mbuti.DG	0.288377	0.00415	69.496	77245
Han_Dalian	Mongolia_LBA_CenterWest_4	Mbuti.DG	0.281543	0.003422	82.279	101082
Han_Dalian	Vietnam_N	Mbuti.DG	0.280582	0.005291	53.033	24790
Han_Dalian	Mongolia_EBA_Ulgii_1	Mbuti.DG	0.278294	0.003562	78.139	95142
Han_Dalian	China_SEastAsia_Coastal_EN	Mbuti.DG	0.277567	0.005491	50.552	31516
Han_Dalian	Mongolia_LBA_Khovsgol_6	Mbuti.DG	0.276807	0.003363	82.304	104406
Han_Dalian	Japan_Jomon.SG	Mbuti.DG	0.272756	0.004027	67.732	83238
Han_Dalian	China_Xinjian_IA.SG	Mbuti.DG	0.256475	0.003701	69.293	74832
Han_Dalian	Mongolia_LBA_MongunTaiga_3	Mbuti.DG	0.2529	0.003504	72.179	94351
Han_Dalian	Mongolia_EIA_Sagly_4	Mbuti.DG	0.252461	0.003153	80.075	103919
Han_Dalian	Mongolia_EIA_2	Mbuti.DG	0.248574	0.003954	62.871	76623
Han_Dalian	Mongolia_Uvs_EIAXiongnuLateMedival	Mbuti.DG	0.248041	0.003188	77.804	103633
Han_Dalian	Mongolia_EIA_Pazyryk_6	Mbuti.DG	0.247908	0.003712	66.782	78289
Han_Dalian	Mongolia_LBA_CenterWest_5	Mbuti.DG	0.247357	0.003414	72.456	98720
Han_Dalian	China_AmurRiver_Paleolithic	Mbuti.DG	0.246531	0.003814	64.639	93123
Han_Dalian	China_Tianyuan	Mbuti.DG	0.245278	0.003847	63.762	83322
Han_Dalian	Mongolia_Arkhangai_Xiongnu	Mbuti.DG	0.239726	0.003188	75.202	103021
Han_Dalian	Laos_Hoabinhian.SG	Mbuti.DG	0.238792	0.004455	53.597	41287
Han_Dalian	Mongolia_Arkhangai_XiongnuEarlyMedieval_2	Mbuti.DG	0.232383	0.003441	67.535	84179
Han_Dalian	Russia_Samara_EBA_Yamnaya	Mbuti.DG	0.225312	0.003072	73.341	102120
Han_Dalian	Russia_Andronovo.SG	Mbuti.DG	0.225251	0.003236	69.614	105597
Han_Dalian	Luxembourg_Loschbour.DG	Mbuti.DG	0.224768	0.003401	66.088	100042
Han_Dalian	Russia_Afanasievo	Mbuti.DG	0.223978	0.002952	75.862	104618
Han_Dalian	Russia_Caucasus_EBA_Yamnaya	Mbuti.DG	0.223589	0.003434	65.116	72198
Han_Dalian	Russia_MLBA_Sintashta	Mbuti.DG	0.222559	0.002951	75.413	105103
Han_Dalian	Russia_Kalmykia_EBA_Yamnaya.SG	Mbuti.DG	0.22225	0.003119	71.266	101889
Han_Dalian	Ukraine_EBA_Yamnaya	Mbuti.DG	0.221188	0.003665	60.354	76901
Han_Dalian	Russia_Alan.SG	Mbuti.DG	0.220296	0.003159	69.733	105777
Han_Dalian	Iran_Hasanlu_IA.SG	Mbuti.DG	0.218878	0.003478	62.936	91617
Han_Dalian	Hungary_LateC_EBA_Baden_Yamnaya	Mbuti.DG	0.217112	0.003368	64.454	82848
Han_Dalian	Iran_Wezmeh_N.SG	Mbuti.DG	0.212178	0.003245	65.378	106365
Han_Dalian	Iran_GanjDareh_N	Mbuti.DG	0.212041	0.003025	70.092	99192
Han_Dalian	Iran_TepeAbdulHosein_N.SG	Mbuti.DG	0.212021	0.003168	66.918	98220

## Sheet: J
Supplementary Table 5: The result of outgroup-f3 (Han_Shenyang, Ancient population; Mbuti) based on 1240K merged dataset
Source 1	Source 2	Target	f_3	std. err	Z	SNPs
Han_Shenyang	China_YR_MN	Mbuti.DG	0.301873	0.003632	83.118	105676
Han_Shenyang	China_WLR_LN	Mbuti.DG	0.301224	0.003806	79.154	87630
Han_Shenyang	China_YR_LBIA	Mbuti.DG	0.30084	0.003559	84.538	105616
Han_Shenyang	China_YR_LN	Mbuti.DG	0.300362	0.00358	83.895	106355
Han_Shenyang	China_Shimao_LN	Mbuti.DG	0.300086	0.003692	81.279	105063
Han_Shenyang	China_Upper_YR_LN	Mbuti.DG	0.299689	0.003555	84.308	105314
Han_Shenyang	Russia_EarlyMedieval_Heshui_Mohe_1	Mbuti.DG	0.299396	0.005642	53.067	29595
Han_Shenyang	Taiwan_Gongguan	Mbuti.DG	0.299348	0.004266	70.165	66373
Han_Shenyang	China_Upper_YR_IA	Mbuti.DG	0.298905	0.003722	80.305	102195
Han_Shenyang	China_WLR_BA	Mbuti.DG	0.298642	0.004374	68.275	57377
Han_Shenyang	China_NEastAsia_Coastal_EN	Mbuti.DG	0.297691	0.003648	81.611	97883
Han_Shenyang	China_AmurRiver_N	Mbuti.DG	0.297209	0.003791	78.395	82733
Han_Shenyang	China_WLR_MN	Mbuti.DG	0.297151	0.003805	78.101	105568
Han_Shenyang	China_Miaozigou_MN	Mbuti.DG	0.296843	0.005107	58.121	31188
Han_Shenyang	China_AmurRiver_EarlyN	Mbuti.DG	0.296658	0.003984	74.463	74990
Han_Shenyang	Russia_MN_Boisman	Mbuti.DG	0.296194	0.003599	82.3	95389
Han_Shenyang	China_AR_Xianbei_IA	Mbuti.DG	0.295867	0.005382	54.97	26792
Han_Shenyang	Taiwan_Hanben_IA	Mbuti.DG	0.295859	0.003501	84.502	105802
Han_Shenyang	Russia_DevilsCave_N.SG	Mbuti.DG	0.295676	0.003607	81.982	106356
Han_Shenyang	Mongolia_Khentii_Xiongnu	Mbuti.DG	0.295396	0.003857	76.585	87221
Han_Shenyang	Nepal_Mebrak_2125BP.SG	Mbuti.DG	0.294552	0.004274	68.91	70080
Han_Shenyang	China_AR_EN	Mbuti.DG	0.294253	0.005142	57.221	34013
Han_Shenyang	China_AmurRiver_Mesolithic	Mbuti.DG	0.293877	0.004013	73.227	70697
Han_Shenyang	Mongolia_Tuv_Xiongnu	Mbuti.DG	0.293727	0.003895	75.419	94398
Han_Shenyang	China_NEastAsia_Inland_EN	Mbuti.DG	0.293265	0.004128	71.042	81270
Han_Shenyang	Mongolia_Tuv_LatEMedieval	Mbuti.DG	0.293254	0.003735	78.516	93474
Han_Shenyang	China_SEastAsia_Coastal_LN	Mbuti.DG	0.292692	0.004155	70.441	63846
Han_Shenyang	Mongolia_East_N	Mbuti.DG	0.292666	0.003647	80.243	92684
Han_Shenyang	Vietnam_BA	Mbuti.DG	0.291288	0.005327	54.684	32976
Han_Shenyang	China_AmurRiver_LPaleolithic	Mbuti.DG	0.290409	0.00384	75.636	83701
Han_Shenyang	Mongolia_EIA_SlabGrave_1	Mbuti.DG	0.290356	0.003477	83.513	103133
Han_Shenyang	Mongolia_North_N	Mbuti.DG	0.290212	0.003501	82.897	99090
Han_Shenyang	Nepal_Chokhopani_2800BP.SG	Mbuti.DG	0.290097	0.003832	75.703	106163
Han_Shenyang	Russia_Buryatia_Xiongnu	Mbuti.DG	0.289877	0.00353	82.125	100278
Han_Shenyang	Nepal_Samdzong_1500BP.SG	Mbuti.DG	0.289659	0.003562	81.313	106368
Han_Shenyang	Mongolia_Bulgan_Xiongnu	Mbuti.DG	0.288186	0.003615	79.726	93296
Han_Shenyang	Mongolia_EIA_Xiongnu_7	Mbuti.DG	0.28747	0.004116	69.843	77232
Han_Shenyang	Mongolia_LBA_CenterWest_4	Mbuti.DG	0.281493	0.003439	81.862	101046
Han_Shenyang	Vietnam_N	Mbuti.DG	0.280062	0.005314	52.705	24775
Han_Shenyang	China_SEastAsia_Coastal_EN	Mbuti.DG	0.278502	0.005441	51.185	31496
Han_Shenyang	Mongolia_EBA_Ulgii_1	Mbuti.DG	0.277959	0.003604	77.116	95106
Han_Shenyang	Mongolia_LBA_Khovsgol_6	Mbuti.DG	0.276499	0.003378	81.846	104380
Han_Shenyang	Japan_Jomon.SG	Mbuti.DG	0.272464	0.00399	68.284	83201
Han_Shenyang	China_Xinjian_IA.SG	Mbuti.DG	0.25563	0.003693	69.221	74777
Han_Shenyang	Mongolia_LBA_MongunTaiga_3	Mbuti.DG	0.252827	0.003512	71.983	94324
Han_Shenyang	Mongolia_EIA_Sagly_4	Mbuti.DG	0.252228	0.003168	79.616	103922
Han_Shenyang	Mongolia_EIA_2	Mbuti.DG	0.248996	0.003991	62.382	76597
Han_Shenyang	Mongolia_EIA_Pazyryk_6	Mbuti.DG	0.24793	0.003676	67.443	78250
Han_Shenyang	Mongolia_Uvs_EIAXiongnuLateMedival	Mbuti.DG	0.247642	0.003191	77.605	103595
Han_Shenyang	Mongolia_LBA_CenterWest_5	Mbuti.DG	0.247561	0.003398	72.854	98677
Han_Shenyang	China_AmurRiver_Paleolithic	Mbuti.DG	0.245634	0.003829	64.148	93093
Han_Shenyang	China_Tianyuan	Mbuti.DG	0.245063	0.003787	64.708	83291
Han_Shenyang	Mongolia_Arkhangai_Xiongnu	Mbuti.DG	0.239592	0.00321	74.645	102992
Han_Shenyang	Laos_Hoabinhian.SG	Mbuti.DG	0.237577	0.004463	53.236	41282
Han_Shenyang	Mongolia_Arkhangai_XiongnuEarlyMedieval_2	Mbuti.DG	0.233733	0.003461	67.536	84124
Han_Shenyang	Russia_Samara_EBA_Yamnaya	Mbuti.DG	0.225473	0.003081	73.185	102088
Han_Shenyang	Russia_Andronovo.SG	Mbuti.DG	0.225164	0.003249	69.293	105553
Han_Shenyang	Luxembourg_Loschbour.DG	Mbuti.DG	0.2245	0.003489	64.34	100010
Han_Shenyang	Russia_Caucasus_EBA_Yamnaya	Mbuti.DG	0.224423	0.003501	64.11	72171
Han_Shenyang	Russia_Afanasievo	Mbuti.DG	0.224306	0.002992	74.973	104600
Han_Shenyang	Russia_MLBA_Sintashta	Mbuti.DG	0.222706	0.00299	74.494	105087
Han_Shenyang	Russia_Kalmykia_EBA_Yamnaya.SG	Mbuti.DG	0.222331	0.00312	71.264	101861
Han_Shenyang	Ukraine_EBA_Yamnaya	Mbuti.DG	0.222293	0.003683	60.362	76862
Han_Shenyang	Russia_Alan.SG	Mbuti.DG	0.220745	0.003169	69.667	105727
Han_Shenyang	Iran_Hasanlu_IA.SG	Mbuti.DG	0.217808	0.003539	61.544	91583
Han_Shenyang	Hungary_LateC_EBA_Baden_Yamnaya	Mbuti.DG	0.217488	0.003396	64.038	82779
Han_Shenyang	Iran_TepeAbdulHosein_N.SG	Mbuti.DG	0.212811	0.003203	66.45	98175
Han_Shenyang	Iran_Wezmeh_N.SG	Mbuti.DG	0.212479	0.003248	65.419	106331
Han_Shenyang	Iran_GanjDareh_N	Mbuti.DG	0.211676	0.003052	69.361	99177

[truncated: 2 more sheets: K, L]
