# Supplementary material for: Genetic structure and demographic history of Northern Han people in Liaoning Province inferred from genome-wide array data
Source: Frontiers journal article supplement (doi:10.3389/fevo.2022.1014024), 2022-11-03
Supplement: Table_6.XLSX [file Table_6.XLSX]

## Sheet: A
Supplymentary Table 6A: The results of f4-statistics in the form of f4 (Modern population1, Modern population2; Han_Liaoning, Mbuti) based on 1240k merged dataset
Pop1 (W)	Pop2 (X)	Pop3 (Y)	Pop4 (Z)	D-stat	Z	BABA	ABBA	SNPs
French.DG	CHS.SG	Han_Liaoning	Mbuti.DG	-0.023393	-52.555	7886	10383	106722
French.DG	CHB.SG	Han_Liaoning	Mbuti.DG	-0.023419	-52.345	7883	10383	106722
French.DG	JPT.SG	Han_Liaoning	Mbuti.DG	-0.022917	-51.501	7918	10364	106722
French.DG	Manchu_Liaoning	Han_Liaoning	Mbuti.DG	-0.023064	-51.422	7898	10359	106698
French.DG	Mongolian_FX	Han_Liaoning	Mbuti.DG	-0.02179	-51.236	7908	10233	106722
Spanish.DG	CHB.SG	Han_Liaoning	Mbuti.DG	-0.024399	-50.056	7857	10461	106708
Spanish.DG	CHS.SG	Han_Liaoning	Mbuti.DG	-0.024373	-49.869	7859	10460	106708
Spanish.DG	Manchu_Liaoning	Han_Liaoning	Mbuti.DG	-0.024039	-49.143	7870	10434	106684
Spanish.DG	JPT.SG	Han_Liaoning	Mbuti.DG	-0.023896	-48.949	7885	10435	106708
English.DG	CHB.SG	Han_Liaoning	Mbuti.DG	-0.023933	-48.777	7866	10420	106716
English.DG	CHS.SG	Han_Liaoning	Mbuti.DG	-0.023909	-48.743	7870	10421	106716
Spanish.DG	Mongolian_FX	Han_Liaoning	Mbuti.DG	-0.022769	-48.679	7881	10311	106708
Turkish.DG	CHB.SG	Han_Liaoning	Mbuti.DG	-0.023273	-48.473	7851	10335	106719
Turkish.DG	CHS.SG	Han_Liaoning	Mbuti.DG	-0.023246	-48.32	7855	10336	106719
Tajik.DG	CHS.SG	Han_Liaoning	Mbuti.DG	-0.022006	-48.149	7909	10258	106718
English.DG	JPT.SG	Han_Liaoning	Mbuti.DG	-0.023432	-48.125	7898	10398	106716
Tajik.DG	CHB.SG	Han_Liaoning	Mbuti.DG	-0.022033	-48.029	7906	10257	106718
English.DG	Manchu_Liaoning	Han_Liaoning	Mbuti.DG	-0.023574	-47.897	7882	10397	106692
Turkish.DG	Manchu_Liaoning	Han_Liaoning	Mbuti.DG	-0.022908	-47.658	7865	10309	106695
Turkish.DG	JPT.SG	Han_Liaoning	Mbuti.DG	-0.02277	-47.4	7881	10311	106719
Tajik.DG	Manchu_Liaoning	Han_Liaoning	Mbuti.DG	-0.021676	-47.246	7917	10230	106694
Turkish.DG	Mongolian_FX	Han_Liaoning	Mbuti.DG	-0.021642	-47.162	7876	10185	106719
English.DG	Mongolian_FX	Han_Liaoning	Mbuti.DG	-0.022304	-47.035	7889	10270	106716
Tajik.DG	JPT.SG	Han_Liaoning	Mbuti.DG	-0.02153	-46.983	7933	10231	106718
Tajik.DG	Mongolian_FX	Han_Liaoning	Mbuti.DG	-0.020402	-46.528	7933	10110	106718
French.DG	Han.DG	Han_Liaoning	Mbuti.DG	-0.023684	-46.245	7855	10382	106722
Spanish.DG	Han.DG	Han_Liaoning	Mbuti.DG	-0.024665	-45.564	7834	10466	106708
French.DG	Dai.DG	Han_Liaoning	Mbuti.DG	-0.021299	-45.491	7976	10249	106722
French.DG	Naxi.DG	Han_Liaoning	Mbuti.DG	-0.022346	-45.237	7922	10307	106719
Spanish.DG	Naxi.DG	Han_Liaoning	Mbuti.DG	-0.023327	-44.683	7888	10377	106705
French.DG	Yi.DG	Han_Liaoning	Mbuti.DG	-0.022381	-44.612	7922	10310	106714
French.DG	She.DG	Han_Liaoning	Mbuti.DG	-0.023297	-44.331	7878	10364	106697
Spanish.DG	Dai.DG	Han_Liaoning	Mbuti.DG	-0.02228	-44.261	7943	10320	106708
French.DG	Japanese.DG	Han_Liaoning	Mbuti.DG	-0.022383	-44.114	7934	10323	106717
English.DG	Han.DG	Han_Liaoning	Mbuti.DG	-0.0242	-44.045	7845	10427	106716
French.DG	Miao.DG	Han_Liaoning	Mbuti.DG	-0.022793	-43.772	7913	10345	106715
Spanish.DG	Yi.DG	Han_Liaoning	Mbuti.DG	-0.023361	-43.58	7897	10389	106700
French.DG	Mongola.DG	Han_Liaoning	Mbuti.DG	-0.021394	-43.383	7898	10181	106715
English.DG	Dai.DG	Han_Liaoning	Mbuti.DG	-0.021815	-43.243	7957	10285	106716
Turkish.DG	Han.DG	Han_Liaoning	Mbuti.DG	-0.023536	-43.016	7826	10337	106719
Turkish.DG	Dai.DG	Han_Liaoning	Mbuti.DG	-0.021155	-42.984	7948	10205	106719
English.DG	Naxi.DG	Han_Liaoning	Mbuti.DG	-0.022861	-42.955	7909	10349	106713
French.DG	Korean.DG	Han_Liaoning	Mbuti.DG	-0.022852	-42.823	7907	10346	106714
Spanish.DG	She.DG	Han_Liaoning	Mbuti.DG	-0.024279	-42.695	7873	10463	106683
English.DG	Yi.DG	Han_Liaoning	Mbuti.DG	-0.022892	-42.604	7897	10340	106709
Tajik.DG	Han.DG	Han_Liaoning	Mbuti.DG	-0.022295	-42.571	7876	10255	106718
Tajik.DG	Dai.DG	Han_Liaoning	Mbuti.DG	-0.019916	-42.415	7997	10122	106718
Turkish.DG	Naxi.DG	Han_Liaoning	Mbuti.DG	-0.022198	-42.405	7900	10269	106717
Spanish.DG	Japanese.DG	Han_Liaoning	Mbuti.DG	-0.023363	-42.328	7885	10378	106703
Spanish.DG	Miao.DG	Han_Liaoning	Mbuti.DG	-0.023775	-42.196	7876	10413	106700
French.DG	Xibo.DG	Han_Liaoning	Mbuti.DG	-0.021458	-41.892	7921	10211	106713
Spanish.DG	Korean.DG	Han_Liaoning	Mbuti.DG	-0.023834	-41.89	7886	10429	106700
English.DG	Japanese.DG	Han_Liaoning	Mbuti.DG	-0.022902	-41.873	7894	10338	106712
Spanish.DG	Mongola.DG	Han_Liaoning	Mbuti.DG	-0.022377	-41.746	7873	10261	106700
English.DG	She.DG	Han_Liaoning	Mbuti.DG	-0.02381	-41.654	7853	10394	106692
English.DG	Mongola.DG	Han_Liaoning	Mbuti.DG	-0.02191	-41.555	7874	10212	106709
Tajik.DG	Naxi.DG	Han_Liaoning	Mbuti.DG	-0.020958	-41.474	7951	10187	106716
French.DG	Ami.DG	Han_Liaoning	Mbuti.DG	-0.022617	-41.374	7883	10296	106716
Tajik.DG	Yi.DG	Han_Liaoning	Mbuti.DG	-0.020994	-41.365	7919	10160	106713
French.DG	Kinh.DG	Han_Liaoning	Mbuti.DG	-0.021398	-41.177	7958	10241	106704
Spanish.DG	Xibo.DG	Han_Liaoning	Mbuti.DG	-0.022437	-41.146	7887	10281	106700
Tajik.DG	Japanese.DG	Han_Liaoning	Mbuti.DG	-0.020995	-40.976	7910	10150	106712
Tajik.DG	She.DG	Han_Liaoning	Mbuti.DG	-0.021908	-40.974	7887	10224	106694
Turkish.DG	Japanese.DG	Han_Liaoning	Mbuti.DG	-0.022235	-40.916	7886	10259	106713
Turkish.DG	She.DG	Han_Liaoning	Mbuti.DG	-0.023148	-40.893	7854	10324	106694
French.DG	Oroqen.DG	Han_Liaoning	Mbuti.DG	-0.021111	-40.885	7920	10173	106707
English.DG	Miao.DG	Han_Liaoning	Mbuti.DG	-0.023304	-40.866	7880	10367	106710
French.DG	Tujia.DG	Han_Liaoning	Mbuti.DG	-0.022751	-40.821	7912	10340	106710
Turkish.DG	Yi.DG	Han_Liaoning	Mbuti.DG	-0.022233	-40.648	7909	10282	106714
French.DG	Igorot.DG	Han_Liaoning	Mbuti.DG	-0.021744	-40.598	7968	10288	106705
French.DG	Hezhen.DG	Han_Liaoning	Mbuti.DG	-0.021458	-40.574	7915	10205	106716
Turkish.DG	Xibo.DG	Han_Liaoning	Mbuti.DG	-0.021305	-40.475	7880	10154	106711
English.DG	Korean.DG	Han_Liaoning	Mbuti.DG	-0.023368	-40.469	7900	10394	106709
English.DG	Oroqen.DG	Han_Liaoning	Mbuti.DG	-0.021617	-40.467	7867	10173	106701
Spanish.DG	Tujia.DG	Han_Liaoning	Mbuti.DG	-0.023722	-40.427	7883	10414	106695
English.DG	Ulchi.DG	Han_Liaoning	Mbuti.DG	-0.021313	-40.343	7918	10192	106705
English.DG	Tujia.DG	Han_Liaoning	Mbuti.DG	-0.023263	-40.261	7900	10382	106704
Turkish.DG	Korean.DG	Han_Liaoning	Mbuti.DG	-0.02271	-40.259	7863	10286	106711
Spanish.DG	Kinh.DG	Han_Liaoning	Mbuti.DG	-0.022377	-40.248	7943	10330	106692
Tajik.DG	Korean.DG	Han_Liaoning	Mbuti.DG	-0.021471	-40.19	7929	10220	106711
French.DG	Ulchi.DG	Han_Liaoning	Mbuti.DG	-0.020798	-40.179	7957	10176	106709
Spanish.DG	Oroqen.DG	Han_Liaoning	Mbuti.DG	-0.022091	-40.165	7897	10254	106693
Turkish.DG	Miao.DG	Han_Liaoning	Mbuti.DG	-0.022641	-40.14	7882	10298	106712
French.DG	Buryat.SG	Han_Liaoning	Mbuti.DG	-0.01873	-40.099	7940	9939	106722
Tajik.DG	Miao.DG	Han_Liaoning	Mbuti.DG	-0.021405	-40.075	7907	10191	106711
Spanish.DG	Ami.DG	Han_Liaoning	Mbuti.DG	-0.023594	-39.804	7868	10386	106702
Spanish.DG	Igorot.DG	Han_Liaoning	Mbuti.DG	-0.022726	-39.689	7933	10358	106691
Turkish.DG	Mongola.DG	Han_Liaoning	Mbuti.DG	-0.021243	-39.673	7871	10137	106712
English.DG	Xibo.DG	Han_Liaoning	Mbuti.DG	-0.021971	-39.603	7902	10247	106708
Spanish.DG	Buryat.SG	Han_Liaoning	Mbuti.DG	-0.01971	-39.52	7889	9992	106708
English.DG	Ami.DG	Han_Liaoning	Mbuti.DG	-0.023133	-39.513	7886	10355	106710
Turkish.DG	Tujia.DG	Han_Liaoning	Mbuti.DG	-0.022611	-39.394	7878	10291	106708
Spanish.DG	China_Lahu.DG	Han_Liaoning	Mbuti.DG	-0.021764	-39.305	7944	10266	106700
Spanish.DG	Ulchi.DG	Han_Liaoning	Mbuti.DG	-0.021783	-39.263	7928	10252	106694
Spanish.DG	Hezhen.DG	Han_Liaoning	Mbuti.DG	-0.022433	-39.223	7920	10314	106702
Tajik.DG	Mongola.DG	Han_Liaoning	Mbuti.DG	-0.020008	-39.206	7940	10075	106711
French.DG	China_Lahu.DG	Han_Liaoning	Mbuti.DG	-0.020779	-39.2	8001	10218	106714
English.DG	Kinh.DG	Han_Liaoning	Mbuti.DG	-0.021915	-39.152	7933	10271	106699
French.DG	Tu.DG	Han_Liaoning	Mbuti.DG	-0.020456	-39.118	7972	10155	106713
English.DG	Igorot.DG	Han_Liaoning	Mbuti.DG	-0.022253	-39.095	7918	10292	106699
French.DG	Tibetan.DG	Han_Liaoning	Mbuti.DG	-0.019661	-39.088	7998	10096	106712
Tajik.DG	Xibo.DG	Han_Liaoning	Mbuti.DG	-0.020069	-39.075	7951	10092	106710
Turkish.DG	Oroqen.DG	Han_Liaoning	Mbuti.DG	-0.020959	-38.92	7880	10116	106705
French.DG	Even.DG	Han_Liaoning	Mbuti.DG	-0.019551	-38.657	7945	10031	106722
Tajik.DG	Tujia.DG	Han_Liaoning	Mbuti.DG	-0.021368	-38.632	7913	10193	106707
English.DG	Hezhen.DG	Han_Liaoning	Mbuti.DG	-0.021973	-38.609	7910	10255	106711
Spanish.DG	Tu.DG	Han_Liaoning	Mbuti.DG	-0.021435	-38.592	7936	10223	106698
Turkish.DG	Igorot.DG	Han_Liaoning	Mbuti.DG	-0.021593	-38.591	7937	10241	106702
Turkish.DG	Hezhen.DG	Han_Liaoning	Mbuti.DG	-0.021305	-38.573	7902	10176	106712
French.DG	Sherpa.DG	Han_Liaoning	Mbuti.DG	-0.020438	-38.494	7973	10155	106717
Turkish.DG	Ami.DG	Han_Liaoning	Mbuti.DG	-0.022476	-38.439	7870	10268	106713
Spanish.DG	Tibetan.DG	Han_Liaoning	Mbuti.DG	-0.020636	-38.303	7966	10167	106697
Turkish.DG	Ulchi.DG	Han_Liaoning	Mbuti.DG	-0.020654	-38.25	7908	10112	106707
Turkish.DG	Kinh.DG	Han_Liaoning	Mbuti.DG	-0.021251	-38.247	7930	10198	106702
English.DG	Buryat.SG	Han_Liaoning	Mbuti.DG	-0.019242	-38.227	7893	9946	106716
Spanish.DG	Even.DG	Han_Liaoning	Mbuti.DG	-0.02053	-38.192	7920	10110	106707
Tajik.DG	Ami.DG	Han_Liaoning	Mbuti.DG	-0.021233	-38.128	7914	10180	106712
Papuan.DG	CHS.SG	Han_Liaoning	Mbuti.DG	-0.018948	-38.073	7909	9931	106722
French.DG	Thai.DG	Han_Liaoning	Mbuti.DG	-0.018863	-38.037	8033	10046	106705
Tajik.DG	Kinh.DG	Han_Liaoning	Mbuti.DG	-0.020008	-38.032	7977	10112	106701
Tajik.DG	Oroqen.DG	Han_Liaoning	Mbuti.DG	-0.01972	-38.032	7893	9997	106704
Papuan.DG	CHB.SG	Han_Liaoning	Mbuti.DG	-0.018974	-37.737	7928	9953	106722
Spanish.DG	Sherpa.DG	Han_Liaoning	Mbuti.DG	-0.021416	-37.676	7946	10231	106702
Turkish.DG	Buryat.SG	Han_Liaoning	Mbuti.DG	-0.018583	-37.634	7907	9891	106719
Tajik.DG	Ulchi.DG	Han_Liaoning	Mbuti.DG	-0.019417	-37.625	7943	10015	106706
Spanish.DG	Thai.DG	Han_Liaoning	Mbuti.DG	-0.019839	-37.27	8000	10117	106691
English.DG	China_Lahu.DG	Han_Liaoning	Mbuti.DG	-0.021303	-37.245	7967	10241	106708
English.DG	Sherpa.DG	Han_Liaoning	Mbuti.DG	-0.020952	-37.175	7975	10211	106711
English.DG	Even.DG	Han_Liaoning	Mbuti.DG	-0.020066	-37.125	7923	10065	106716
Turkish.DG	China_Lahu.DG	Han_Liaoning	Mbuti.DG	-0.020632	-37.05	7924	10125	106712
Tajik.DG	Hezhen.DG	Han_Liaoning	Mbuti.DG	-0.020068	-37.034	7953	10095	106712
Papuan.DG	Manchu_Liaoning	Han_Liaoning	Mbuti.DG	-0.018613	-37.024	7948	9934	106698
Tajik.DG	Igorot.DG	Han_Liaoning	Mbuti.DG	-0.020351	-36.965	7980	10152	106701
English.DG	Thai.DG	Han_Liaoning	Mbuti.DG	-0.019381	-36.831	8024	10092	106699
English.DG	Tu.DG	Han_Liaoning	Mbuti.DG	-0.020967	-36.809	7950	10187	106707
Papuan.DG	JPT.SG	Han_Liaoning	Mbuti.DG	-0.018471	-36.635	7953	9925	106722
Turkish.DG	Tu.DG	Han_Liaoning	Mbuti.DG	-0.020309	-36.539	7950	10117	106711
Tajik.DG	Tu.DG	Han_Liaoning	Mbuti.DG	-0.01907	-36.528	7993	10028	106710
Turkish.DG	Sherpa.DG	Han_Liaoning	Mbuti.DG	-0.020295	-36.501	7960	10126	106714
French.DG	Yakut.DG	Han_Liaoning	Mbuti.DG	-0.018425	-36.336	7957	9923	106705
Turkish.DG	Even.DG	Han_Liaoning	Mbuti.DG	-0.019403	-36.279	7913	9983	106718
English.DG	Tibetan.DG	Han_Liaoning	Mbuti.DG	-0.020171	-36.029	7984	10136	106706
Tajik.DG	China_Lahu.DG	Han_Liaoning	Mbuti.DG	-0.019394	-35.994	8020	10090	106710
Tajik.DG	Buryat.SG	Han_Liaoning	Mbuti.DG	-0.017344	-35.839	7961	9812	106718
Tajik.DG	Even.DG	Han_Liaoning	Mbuti.DG	-0.018163	-35.793	7963	9901	106717
Tajik.DG	Thai.DG	Han_Liaoning	Mbuti.DG	-0.017482	-35.687	8063	9928	106701
Turkish.DG	Tibetan.DG	Han_Liaoning	Mbuti.DG	-0.019512	-35.659	7966	10049	106709
Turkish.DG	Thai.DG	Han_Liaoning	Mbuti.DG	-0.018718	-35.624	8016	10013	106702
Tajik.DG	Tibetan.DG	Han_Liaoning	Mbuti.DG	-0.018269	-35.609	8020	9970	106709
French.DG	Daur.DG	Han_Liaoning	Mbuti.DG	-0.02137	-35.488	7925	10200	106454
Spanish.DG	Daur.DG	Han_Liaoning	Mbuti.DG	-0.022361	-35.353	7867	10247	106439
French.DG	Atayal.DG	Han_Liaoning	Mbuti.DG	-0.022064	-35.216	7925	10276	106543
Tajik.DG	Sherpa.DG	Han_Liaoning	Mbuti.DG	-0.019055	-35.21	8008	10041	106713
Papuan.DG	Han.DG	Han_Liaoning	Mbuti.DG	-0.019239	-34.897	7875	9928	106722
English.DG	Daur.DG	Han_Liaoning	Mbuti.DG	-0.02189	-34.887	7862	10192	106449
English.DG	Yakut.DG	Han_Liaoning	Mbuti.DG	-0.018946	-34.865	7927	9949	106699
Papuan.DG	Mongolian_FX	Han_Liaoning	Mbuti.DG	-0.017345	-34.701	8004	9855	106722
Turkish.DG	Yakut.DG	Han_Liaoning	Mbuti.DG	-0.018277	-34.588	7927	9877	106702
Australian.DG	CHS.SG	Han_Liaoning	Mbuti.DG	-0.018095	-34.581	7943	9874	106691
Spanish.DG	Yakut.DG	Han_Liaoning	Mbuti.DG	-0.019403	-34.532	7919	9989	106690
Australian.DG	CHB.SG	Han_Liaoning	Mbuti.DG	-0.01812	-34.47	7962	9895	106691
Turkish.DG	Daur.DG	Han_Liaoning	Mbuti.DG	-0.02123	-34.448	7842	10102	106451
English.DG	Atayal.DG	Han_Liaoning	Mbuti.DG	-0.022585	-34.139	7923	10329	106540
Spanish.DG	Atayal.DG	Han_Liaoning	Mbuti.DG	-0.023052	-33.885	7906	10362	106530
Australian.DG	Manchu_Liaoning	Han_Liaoning	Mbuti.DG	-0.017761	-33.728	7981	9876	106667
Papuan.DG	Naxi.DG	Han_Liaoning	Mbuti.DG	-0.017897	-33.614	7955	9865	106719
Australian.DG	JPT.SG	Han_Liaoning	Mbuti.DG	-0.017614	-33.313	7986	9865	106691
Papuan.DG	Dai.DG	Han_Liaoning	Mbuti.DG	-0.016854	-33.155	7981	9780	106722
Papuan.DG	She.DG	Han_Liaoning	Mbuti.DG	-0.018846	-33.011	7902	9913	106697
Tajik.DG	Daur.DG	Han_Liaoning	Mbuti.DG	-0.020015	-32.872	7921	10052	106453
Papuan.DG	Japanese.DG	Han_Liaoning	Mbuti.DG	-0.017939	-32.723	7944	9859	106717
Australian.DG	Han.DG	Han_Liaoning	Mbuti.DG	-0.018384	-32.543	7914	9876	106691
Turkish.DG	Atayal.DG	Han_Liaoning	Mbuti.DG	-0.021915	-32.533	7921	10256	106541
Tajik.DG	Yakut.DG	Han_Liaoning	Mbuti.DG	-0.017041	-32.511	7995	9813	106701
Papuan.DG	Korean.DG	Han_Liaoning	Mbuti.DG	-0.018407	-32.456	7962	9926	106714
Papuan.DG	Yi.DG	Han_Liaoning	Mbuti.DG	-0.017932	-32.207	7906	9820	106714
Tajik.DG	Atayal.DG	Han_Liaoning	Mbuti.DG	-0.020694	-32.075	7987	10192	106541
Papuan.DG	Miao.DG	Han_Liaoning	Mbuti.DG	-0.01834	-31.845	7910	9867	106715
Australian.DG	Mongolian_FX	Han_Liaoning	Mbuti.DG	-0.016489	-31.649	8041	9800	106691
Papuan.DG	Ami.DG	Han_Liaoning	Mbuti.DG	-0.018175	-31.587	7866	9805	106716
Papuan.DG	Tujia.DG	Han_Liaoning	Mbuti.DG	-0.018299	-31.485	7919	9871	106710
Uyghur.DG	CHB.SG	Han_Liaoning	Mbuti.DG	-0.012813	-31.143	8070	9437	106715
Uyghur.DG	CHS.SG	Han_Liaoning	Mbuti.DG	-0.012788	-31.071	8077	9442	106715
Papuan.DG	Kinh.DG	Han_Liaoning	Mbuti.DG	-0.016954	-30.973	7991	9800	106704
Australian.DG	Naxi.DG	Han_Liaoning	Mbuti.DG	-0.017042	-30.834	7992	9810	106688
Uyghur.DG	Manchu_Liaoning	Han_Liaoning	Mbuti.DG	-0.012458	-30.529	8082	9412	106691
Australian.DG	She.DG	Han_Liaoning	Mbuti.DG	-0.017992	-30.511	7929	9848	106667
Papuan.DG	Xibo.DG	Han_Liaoning	Mbuti.DG	-0.017011	-30.387	8028	9843	106713
Papuan.DG	Igorot.DG	Han_Liaoning	Mbuti.DG	-0.017289	-30.247	7943	9788	106705
French.DG	Mixe.DG	Han_Liaoning	Mbuti.DG	-0.015079	-30.241	7992	9601	106719
Australian.DG	Korean.DG	Han_Liaoning	Mbuti.DG	-0.017556	-29.878	8004	9877	106683
Australian.DG	Yi.DG	Han_Liaoning	Mbuti.DG	-0.017075	-29.807	7979	9800	106683
French.DG	Surui.DG	Han_Liaoning	Mbuti.DG	-0.016357	-29.698	7940	9685	106712
Papuan.DG	Mongola.DG	Han_Liaoning	Mbuti.DG	-0.016952	-29.568	8022	9831	106715
Uyghur.DG	JPT.SG	Han_Liaoning	Mbuti.DG	-0.012312	-29.456	8115	9429	106715
Australian.DG	Japanese.DG	Han_Liaoning	Mbuti.DG	-0.017081	-29.393	7980	9802	106686
Papuan.DG	Oroqen.DG	Han_Liaoning	Mbuti.DG	-0.016663	-29.365	7993	9772	106707
Spanish.DG	Mixe.DG	Han_Liaoning	Mbuti.DG	-0.016061	-29.329	7994	9708	106704
Australian.DG	Dai.DG	Han_Liaoning	Mbuti.DG	-0.016003	-29.317	8027	9734	106691
Australian.DG	Miao.DG	Han_Liaoning	Mbuti.DG	-0.017491	-29.309	7942	9808	106685
Spanish.DG	Surui.DG	Han_Liaoning	Mbuti.DG	-0.017339	-29.255	7921	9771	106697
English.DG	Mixe.DG	Han_Liaoning	Mbuti.DG	-0.015594	-29.199	7975	9639	106714
Australian.DG	Tujia.DG	Han_Liaoning	Mbuti.DG	-0.017447	-29.195	7968	9829	106679
Papuan.DG	Ulchi.DG	Han_Liaoning	Mbuti.DG	-0.016355	-29.028	8034	9780	106709
Australian.DG	Ami.DG	Han_Liaoning	Mbuti.DG	-0.017323	-28.936	7929	9777	106685
English.DG	Surui.DG	Han_Liaoning	Mbuti.DG	-0.01687	-28.498	7916	9716	106707
Spanish.DG	Altaian.DG	Han_Liaoning	Mbuti.DG	-0.016994	-28.326	7879	9689	106545
Uyghur.DG	Han.DG	Han_Liaoning	Mbuti.DG	-0.013077	-28.279	8021	9416	106715
French.DG	Altaian.DG	Han_Liaoning	Mbuti.DG	-0.016023	-28.251	7932	9639	106560
Papuan.DG	China_Lahu.DG	Han_Liaoning	Mbuti.DG	-0.016337	-28.219	7984	9728	106714
Papuan.DG	Hezhen.DG	Han_Liaoning	Mbuti.DG	-0.017009	-28.099	8003	9818	106716
Australian.DG	Kinh.DG	Han_Liaoning	Mbuti.DG	-0.016108	-28.092	8016	9734	106673
Papuan.DG	Tu.DG	Han_Liaoning	Mbuti.DG	-0.01601	-27.932	8061	9769	106713
Turkish.DG	Mixe.DG	Han_Liaoning	Mbuti.DG	-0.014933	-27.914	8035	9629	106715
English.DG	Altaian.DG	Han_Liaoning	Mbuti.DG	-0.016525	-27.799	7886	9646	106556
Uyghur.DG	Mongolian_FX	Han_Liaoning	Mbuti.DG	-0.011183	-27.781	8129	9322	106715
Australian.DG	Xibo.DG	Han_Liaoning	Mbuti.DG	-0.01615	-27.74	8054	9777	106682
Australian.DG	Igorot.DG	Han_Liaoning	Mbuti.DG	-0.01643	-27.613	7993	9746	106674
Papuan.DG	Sherpa.DG	Han_Liaoning	Mbuti.DG	-0.015996	-27.585	8022	9729	106717
Turkish.DG	Surui.DG	Han_Liaoning	Mbuti.DG	-0.01621	-27.356	7989	9718	106709
Papuan.DG	Atayal.DG	Han_Liaoning	Mbuti.DG	-0.017602	-27.319	7935	9811	106543
Tajik.DG	Surui.DG	Han_Liaoning	Mbuti.DG	-0.014973	-27.246	7950	9547	106708
Tajik.DG	Mixe.DG	Han_Liaoning	Mbuti.DG	-0.013691	-27.045	7980	9441	106715
Papuan.DG	Daur.DG	Han_Liaoning	Mbuti.DG	-0.016948	-26.731	7994	9798	106454
Australian.DG	Mongola.DG	Han_Liaoning	Mbuti.DG	-0.016098	-26.717	8051	9768	106685
Turkish.DG	Altaian.DG	Han_Liaoning	Mbuti.DG	-0.015874	-26.486	7890	9581	106557
Australian.DG	Oroqen.DG	Han_Liaoning	Mbuti.DG	-0.01581	-26.477	8040	9726	106677
Papuan.DG	Tibetan.DG	Han_Liaoning	Mbuti.DG	-0.015208	-26.196	8073	9696	106712
Australian.DG	Ulchi.DG	Han_Liaoning	Mbuti.DG	-0.015501	-26.088	8053	9707	106678
Papuan.DG	Even.DG	Han_Liaoning	Mbuti.DG	-0.015106	-26.022	8088	9701	106722
Papuan.DG	Thai.DG	Han_Liaoning	Mbuti.DG	-0.014428	-25.911	8060	9600	106705
Papuan.DG	Buryat.SG	Han_Liaoning	Mbuti.DG	-0.014284	-25.861	8143	9668	106722
Australian.DG	Hezhen.DG	Han_Liaoning	Mbuti.DG	-0.016152	-25.791	8036	9759	106687
Uyghur.DG	She.DG	Han_Liaoning	Mbuti.DG	-0.012689	-25.771	8049	9403	106691
Australian.DG	Atayal.DG	Han_Liaoning	Mbuti.DG	-0.016762	-25.704	7980	9765	106513
Uyghur.DG	Naxi.DG	Han_Liaoning	Mbuti.DG	-0.01174	-25.671	8138	9391	106713
Australian.DG	Tu.DG	Han_Liaoning	Mbuti.DG	-0.015156	-25.669	8078	9695	106682
Australian.DG	China_Lahu.DG	Han_Liaoning	Mbuti.DG	-0.015487	-25.432	8049	9701	106683
Uyghur.DG	Yi.DG	Han_Liaoning	Mbuti.DG	-0.011775	-25.209	8118	9374	106709
Tajik.DG	Altaian.DG	Han_Liaoning	Mbuti.DG	-0.014628	-25.187	7967	9526	106557
Uyghur.DG	Miao.DG	Han_Liaoning	Mbuti.DG	-0.012185	-25.039	8101	9401	106710
Australian.DG	Sherpa.DG	Han_Liaoning	Mbuti.DG	-0.015147	-24.961	8050	9666	106686
Australian.DG	Daur.DG	Han_Liaoning	Mbuti.DG	-0.016105	-24.614	8005	9719	106426
Uyghur.DG	Dai.DG	Han_Liaoning	Mbuti.DG	-0.010696	-24.558	8200	9342	106715
Uyghur.DG	Japanese.DG	Han_Liaoning	Mbuti.DG	-0.011779	-24.528	8126	9383	106711
Uyghur.DG	Korean.DG	Han_Liaoning	Mbuti.DG	-0.012245	-24.307	8092	9399	106707
Papuan.DG	Yakut.DG	Han_Liaoning	Mbuti.DG	-0.013982	-23.941	8165	9657	106705
Australian.DG	Tibetan.DG	Han_Liaoning	Mbuti.DG	-0.014355	-23.805	8106	9638	106682
Spanish.DG	Uyghur.DG	Han_Liaoning	Mbuti.DG	-0.011587	-23.79	7973	9210	106698
Australian.DG	Even.DG	Han_Liaoning	Mbuti.DG	-0.014253	-23.755	8101	9622	106691
Uyghur.DG	Tujia.DG	Han_Liaoning	Mbuti.DG	-0.012155	-23.742	8079	9376	106704
Australian.DG	Thai.DG	Han_Liaoning	Mbuti.DG	-0.013554	-23.357	8110	9556	106676
French.DG	Uyghur.DG	Han_Liaoning	Mbuti.DG	-0.010604	-23.219	8000	9132	106713
Australian.DG	Buryat.SG	Han_Liaoning	Mbuti.DG	-0.013426	-23.174	8167	9599	106691
Uyghur.DG	Ami.DG	Han_Liaoning	Mbuti.DG	-0.012015	-22.773	8113	9395	106709
Uyghur.DG	Xibo.DG	Han_Liaoning	Mbuti.DG	-0.010852	-22.751	8146	9304	106708
Uyghur.DG	Kinh.DG	Han_Liaoning	Mbuti.DG	-0.010793	-22.416	8207	9358	106699
Uyghur.DG	Mongola.DG	Han_Liaoning	Mbuti.DG	-0.01079	-22.066	8147	9298	106708
Uyghur.DG	Igorot.DG	Han_Liaoning	Mbuti.DG	-0.011137	-22.014	8169	9357	106699
English.DG	Uyghur.DG	Han_Liaoning	Mbuti.DG	-0.011124	-21.666	7965	9152	106708
Mixe.DG	CHB.SG	Han_Liaoning	Mbuti.DG	-0.008339	-21.462	8165	9055	106721
Mixe.DG	CHS.SG	Han_Liaoning	Mbuti.DG	-0.008313	-21.376	8177	9064	106721
Australian.DG	Yakut.DG	Han_Liaoning	Mbuti.DG	-0.013125	-21.374	8195	9596	106676
Uyghur.DG	Hezhen.DG	Han_Liaoning	Mbuti.DG	-0.010853	-21.144	8140	9299	106709
Uyghur.DG	Oroqen.DG	Han_Liaoning	Mbuti.DG	-0.010502	-20.855	8114	9235	106701
Uyghur.DG	Tu.DG	Han_Liaoning	Mbuti.DG	-0.00985	-20.741	8225	9276	106706
Uyghur.DG	Ulchi.DG	Han_Liaoning	Mbuti.DG	-0.010193	-20.671	8128	9215	106704
Mixe.DG	Manchu_Liaoning	Han_Liaoning	Mbuti.DG	-0.007985	-20.594	8178	9030	106697
Turkish.DG	Uyghur.DG	Han_Liaoning	Mbuti.DG	-0.010454	-20.504	8039	9154	106710
Mixe.DG	JPT.SG	Han_Liaoning	Mbuti.DG	-0.007837	-20.446	8176	9012	106721
Uyghur.DG	China_Lahu.DG	Han_Liaoning	Mbuti.DG	-0.010177	-20.236	8224	9310	106708
Uyghur.DG	Sherpa.DG	Han_Liaoning	Mbuti.DG	-0.009835	-19.752	8213	9262	106710
Uyghur.DG	Atayal.DG	Han_Liaoning	Mbuti.DG	-0.011461	-19.342	8138	9359	106539
Tajik.DG	Uyghur.DG	Han_Liaoning	Mbuti.DG	-0.009216	-19.331	8101	9085	106709
Uyghur.DG	Daur.DG	Han_Liaoning	Mbuti.DG	-0.010777	-18.917	8115	9262	106448
Mixe.DG	Han.DG	Han_Liaoning	Mbuti.DG	-0.008603	-18.793	8121	9039	106721
Papuan.DG	Surui.DG	Han_Liaoning	Mbuti.DG	-0.011914	-18.563	8202	9473	106712
Uyghur.DG	Tibetan.DG	Han_Liaoning	Mbuti.DG	-0.009049	-18.386	8250	9216	106706
Papuan.DG	Mixe.DG	Han_Liaoning	Mbuti.DG	-0.010636	-18.382	8293	9428	106719
Uyghur.DG	Even.DG	Han_Liaoning	Mbuti.DG	-0.008947	-17.75	8202	9156	106715
Mixe.DG	Mongolian_FX	Han_Liaoning	Mbuti.DG	-0.006709	-17.61	8226	8942	106721
Papuan.DG	Altaian.DG	Han_Liaoning	Mbuti.DG	-0.011563	-17.516	8280	9512	106560
Mixe.DG	She.DG	Han_Liaoning	Mbuti.DG	-0.008216	-17.453	8156	9033	106697
Uyghur.DG	Buryat.SG	Han_Liaoning	Mbuti.DG	-0.008123	-17.242	8229	9096	106715
Uyghur.DG	Thai.DG	Han_Liaoning	Mbuti.DG	-0.008264	-17.038	8328	9210	106698
Australian.DG	Surui.DG	Han_Liaoning	Mbuti.DG	-0.011066	-16.66	8239	9420	106681
Mongolian_FX	CHB.SG	Han_Liaoning	Mbuti.DG	-0.001629	-16.583	8302	8476	106725
Mixe.DG	Miao.DG	Han_Liaoning	Mbuti.DG	-0.007709	-16.295	8182	9005	106714
Mixe.DG	Tujia.DG	Han_Liaoning	Mbuti.DG	-0.007679	-16.22	8197	9017	106709
Australian.DG	Mixe.DG	Han_Liaoning	Mbuti.DG	-0.009793	-16.161	8336	9381	106689
Mixe.DG	Korean.DG	Han_Liaoning	Mbuti.DG	-0.007775	-16.03	8210	9040	106713
Mixe.DG	Japanese.DG	Han_Liaoning	Mbuti.DG	-0.007305	-15.88	8165	8945	106716
Mixe.DG	Naxi.DG	Han_Liaoning	Mbuti.DG	-0.007266	-15.788	8227	9002	106718
Australian.DG	Altaian.DG	Han_Liaoning	Mbuti.DG	-0.010716	-15.714	8313	9455	106531
Uyghur.DG	Yakut.DG	Han_Liaoning	Mbuti.DG	-0.007818	-15.688	8249	9083	106699
Mixe.DG	Ami.DG	Han_Liaoning	Mbuti.DG	-0.007541	-15.47	8201	9006	106715
Mixe.DG	Yi.DG	Han_Liaoning	Mbuti.DG	-0.007301	-15.22	8227	9006	106713
Surui.DG	CHS.SG	Han_Liaoning	Mbuti.DG	-0.007037	-15.107	8246	8997	106714
Surui.DG	CHB.SG	Han_Liaoning	Mbuti.DG	-0.007062	-15.093	8227	8981	106714
Thai.DG	CHB.SG	Han_Liaoning	Mbuti.DG	-0.004554	-15.087	8215	8701	106708
Buryat.SG	CHB.SG	Han_Liaoning	Mbuti.DG	-0.004689	-15.042	8245	8745	106725
Altaian.DG	CHB.SG	Han_Liaoning	Mbuti.DG	-0.007414	-15.014	8171	8961	106562
Thai.DG	CHS.SG	Han_Liaoning	Mbuti.DG	-0.004527	-14.992	8179	8662	106708
Altaian.DG	CHS.SG	Han_Liaoning	Mbuti.DG	-0.007389	-14.978	8191	8979	106562
Yakut.DG	CHB.SG	Han_Liaoning	Mbuti.DG	-0.004996	-14.784	8250	8784	106707
Mongolian_FX	CHS.SG	Han_Liaoning	Mbuti.DG	-0.001604	-14.742	8307	8479	106725
Mixe.DG	Dai.DG	Han_Liaoning	Mbuti.DG	-0.006221	-14.734	8316	8979	106721
Buryat.SG	CHS.SG	Han_Liaoning	Mbuti.DG	-0.004663	-14.554	8266	8764	106725
Yakut.DG	CHS.SG	Han_Liaoning	Mbuti.DG	-0.004969	-14.42	8272	8802	106707
Surui.DG	JPT.SG	Han_Liaoning	Mbuti.DG	-0.00656	-14.299	8234	8934	106714
Surui.DG	Manchu_Liaoning	Han_Liaoning	Mbuti.DG	-0.006701	-14.247	8243	8958	106690
Altaian.DG	Manchu_Liaoning	Han_Liaoning	Mbuti.DG	-0.007046	-14.222	8181	8932	106538
Buryat.SG	Manchu_Liaoning	Han_Liaoning	Mbuti.DG	-0.004331	-13.997	8255	8717	106701
Mongolian_FX	Manchu_Liaoning	Han_Liaoning	Mbuti.DG	-0.001275	-13.996	8318	8454	106701
Surui.DG	Han.DG	Han_Liaoning	Mbuti.DG	-0.007327	-13.967	8185	8966	106714
Thai.DG	Manchu_Liaoning	Han_Liaoning	Mbuti.DG	-0.004203	-13.901	8251	8700	106684
Altaian.DG	JPT.SG	Han_Liaoning	Mbuti.DG	-0.006912	-13.853	8189	8925	106562
Mixe.DG	Mongola.DG	Han_Liaoning	Mbuti.DG	-0.006312	-13.851	8223	8896	106714
Yakut.DG	Manchu_Liaoning	Han_Liaoning	Mbuti.DG	-0.004642	-13.802	8255	8751	106683
Altaian.DG	Han.DG	Han_Liaoning	Mbuti.DG	-0.007684	-13.616	8165	8984	106562
Mixe.DG	Oroqen.DG	Han_Liaoning	Mbuti.DG	-0.006024	-13.409	8110	8753	106706
Buryat.SG	JPT.SG	Han_Liaoning	Mbuti.DG	-0.004187	-13.273	8268	8714	106725
Yakut.DG	JPT.SG	Han_Liaoning	Mbuti.DG	-0.004493	-13.273	8264	8744	106707
Mixe.DG	Xibo.DG	Han_Liaoning	Mbuti.DG	-0.006374	-13.25	8231	8911	106712
Mixe.DG	Hezhen.DG	Han_Liaoning	Mbuti.DG	-0.006377	-13.24	8186	8867	106716
Mixe.DG	Igorot.DG	Han_Liaoning	Mbuti.DG	-0.006659	-13.176	8295	9006	106704
Mixe.DG	Kinh.DG	Han_Liaoning	Mbuti.DG	-0.006316	-12.93	8328	9002	106703
Thai.DG	JPT.SG	Han_Liaoning	Mbuti.DG	-0.004052	-12.912	8289	8721	106708
Surui.DG	She.DG	Han_Liaoning	Mbuti.DG	-0.006938	-12.744	8230	8970	106689
Altaian.DG	She.DG	Han_Liaoning	Mbuti.DG	-0.007285	-12.677	8177	8954	106539
Mixe.DG	Ulchi.DG	Han_Liaoning	Mbuti.DG	-0.005721	-12.392	8144	8754	106708
Thai.DG	Han.DG	Han_Liaoning	Mbuti.DG	-0.004819	-12.349	8143	8657	106708
Yakut.DG	Han.DG	Han_Liaoning	Mbuti.DG	-0.005259	-12.285	8227	8788	106707
Buryat.SG	Han.DG	Han_Liaoning	Mbuti.DG	-0.004955	-12.116	8231	8759	106725
Surui.DG	Miao.DG	Han_Liaoning	Mbuti.DG	-0.006429	-11.918	8248	8934	106708
Tibetan.DG	CHB.SG	Han_Liaoning	Mbuti.DG	-0.003767	-11.872	8261	8663	106714
Surui.DG	Mongolian_FX	Han_Liaoning	Mbuti.DG	-0.005432	-11.85	8290	8870	106714
Mixe.DG	Atayal.DG	Han_Liaoning	Mbuti.DG	-0.006985	-11.848	8241	8985	106542
Altaian.DG	Mongolian_FX	Han_Liaoning	Mbuti.DG	-0.005787	-11.844	8232	8849	106562
Mixe.DG	China_Lahu.DG	Han_Liaoning	Mbuti.DG	-0.005703	-11.789	8346	8954	106713
Altaian.DG	Korean.DG	Han_Liaoning	Mbuti.DG	-0.00685	-11.753	8199	8929	106556
Altaian.DG	Miao.DG	Han_Liaoning	Mbuti.DG	-0.006777	-11.711	8226	8948	106555
Altaian.DG	Naxi.DG	Han_Liaoning	Mbuti.DG	-0.006334	-11.709	8256	8931	106559
Tibetan.DG	CHS.SG	Han_Liaoning	Mbuti.DG	-0.003741	-11.705	8271	8670	106714
Altaian.DG	Tujia.DG	Han_Liaoning	Mbuti.DG	-0.006763	-11.664	8208	8929	106553
Surui.DG	Tujia.DG	Han_Liaoning	Mbuti.DG	-0.006405	-11.594	8297	8980	106703
Surui.DG	Korean.DG	Han_Liaoning	Mbuti.DG	-0.006501	-11.593	8248	8942	106706
Mixe.DG	Daur.DG	Han_Liaoning	Mbuti.DG	-0.006287	-11.572	8189	8858	106453
Altaian.DG	Yi.DG	Han_Liaoning	Mbuti.DG	-0.006384	-11.555	8210	8890	106555
Altaian.DG	Japanese.DG	Han_Liaoning	Mbuti.DG	-0.006373	-11.524	8190	8869	106557
Surui.DG	Ami.DG	Han_Liaoning	Mbuti.DG	-0.006261	-11.406	8271	8939	106709
Even.DG	CHB.SG	Han_Liaoning	Mbuti.DG	-0.003867	-11.402	8281	8694	106724
Surui.DG	Naxi.DG	Han_Liaoning	Mbuti.DG	-0.005986	-11.256	8283	8922	106712
Even.DG	CHS.SG	Han_Liaoning	Mbuti.DG	-0.003841	-11.211	8300	8710	106724
Surui.DG	Yi.DG	Han_Liaoning	Mbuti.DG	-0.006022	-11.21	8244	8887	106708
Yakut.DG	She.DG	Han_Liaoning	Mbuti.DG	-0.004868	-11.184	8237	8756	106683
Surui.DG	Japanese.DG	Han_Liaoning	Mbuti.DG	-0.006025	-11.152	8246	8889	106710
Mixe.DG	Tu.DG	Han_Liaoning	Mbuti.DG	-0.005378	-11.068	8327	8901	106712
Altaian.DG	Ami.DG	Han_Liaoning	Mbuti.DG	-0.006612	-10.985	8231	8936	106558
Mixe.DG	Sherpa.DG	Han_Liaoning	Mbuti.DG	-0.005363	-10.94	8303	8876	106716
Papuan.DG	Uyghur.DG	Han_Liaoning	Mbuti.DG	-0.006158	-10.86	8544	9201	106713
Tibetan.DG	Manchu_Liaoning	Han_Liaoning	Mbuti.DG	-0.003414	-10.805	8274	8638	106690
Buryat.SG	She.DG	Han_Liaoning	Mbuti.DG	-0.004559	-10.783	8279	8766	106699
Thai.DG	She.DG	Han_Liaoning	Mbuti.DG	-0.004419	-10.632	8165	8637	106684
Dai.DG	CHS.SG	Han_Liaoning	Mbuti.DG	-0.002093	-10.495	8220	8443	106725
Altaian.DG	Dai.DG	Han_Liaoning	Mbuti.DG	-0.005306	-10.367	8341	8907	106562
Spanish.DG	Australian.DG	Han_Liaoning	Mbuti.DG	-0.006274	-10.342	8556	9226	106674
Even.DG	Manchu_Liaoning	Han_Liaoning	Mbuti.DG	-0.003518	-10.322	8292	8668	106700
Dai.DG	CHB.SG	Han_Liaoning	Mbuti.DG	-0.002119	-10.301	8264	8490	106725
Yakut.DG	Mongolian_FX	Han_Liaoning	Mbuti.DG	-0.003367	-10.168	8294	8654	106707
Even.DG	Han.DG	Han_Liaoning	Mbuti.DG	-0.004132	-10.141	8256	8697	106724
Buryat.SG	Mongolian_FX	Han_Liaoning	Mbuti.DG	-0.00306	-10.098	8303	8629	106725
Tibetan.DG	Han.DG	Han_Liaoning	Mbuti.DG	-0.004029	-10.072	8229	8659	106714
English.DG	Australian.DG	Han_Liaoning	Mbuti.DG	-0.005805	-9.918	8534	9153	106684
Uyghur.DG	Surui.DG	Han_Liaoning	Mbuti.DG	-0.005752	-9.906	8355	8968	106706
Even.DG	JPT.SG	Han_Liaoning	Mbuti.DG	-0.003365	-9.883	8281	8640	106724
Yakut.DG	Miao.DG	Han_Liaoning	Mbuti.DG	-0.004359	-9.871	8302	8767	106701
Tibetan.DG	JPT.SG	Han_Liaoning	Mbuti.DG	-0.003264	-9.86	8323	8671	106714
Surui.DG	Dai.DG	Han_Liaoning	Mbuti.DG	-0.004945	-9.846	8384	8911	106714
Altaian.DG	Mongola.DG	Han_Liaoning	Mbuti.DG	-0.005374	-9.841	8229	8801	106557
Yakut.DG	Naxi.DG	Han_Liaoning	Mbuti.DG	-0.003922	-9.784	8308	8727	106706
Buryat.SG	Tujia.DG	Han_Liaoning	Mbuti.DG	-0.004027	-9.779	8305	8735	106712
Buryat.SG	Korean.DG	Han_Liaoning	Mbuti.DG	-0.004126	-9.704	8265	8706	106716
Thai.DG	Korean.DG	Han_Liaoning	Mbuti.DG	-0.00399	-9.701	8272	8698	106700
Mixe.DG	Even.DG	Han_Liaoning	Mbuti.DG	-0.004471	-9.692	8179	8656	106721
Mixe.DG	Tibetan.DG	Han_Liaoning	Mbuti.DG	-0.004575	-9.69	8380	8868	106711
Altaian.DG	Igorot.DG	Han_Liaoning	Mbuti.DG	-0.005729	-9.678	8331	8942	106545
Surui.DG	Igorot.DG	Han_Liaoning	Mbuti.DG	-0.005369	-9.672	8328	8901	106697
Altaian.DG	Xibo.DG	Han_Liaoning	Mbuti.DG	-0.005456	-9.635	8219	8800	106554
Yakut.DG	Tujia.DG	Han_Liaoning	Mbuti.DG	-0.004341	-9.618	8280	8743	106697
Altaian.DG	Hezhen.DG	Han_Liaoning	Mbuti.DG	-0.005449	-9.618	8163	8744	106557
Thai.DG	Miao.DG	Han_Liaoning	Mbuti.DG	-0.003922	-9.607	8186	8605	106700
Altaian.DG	Kinh.DG	Han_Liaoning	Mbuti.DG	-0.005407	-9.591	8365	8941	106545
Surui.DG	Hezhen.DG	Han_Liaoning	Mbuti.DG	-0.005103	-9.589	8228	8773	106709
Thai.DG	Mongolian_FX	Han_Liaoning	Mbuti.DG	-0.002925	-9.583	8356	8668	106708
Yakut.DG	Korean.DG	Han_Liaoning	Mbuti.DG	-0.004432	-9.56	8251	8724	106699
Thai.DG	Tujia.DG	Han_Liaoning	Mbuti.DG	-0.003889	-9.525	8204	8619	106696
Surui.DG	Mongola.DG	Han_Liaoning	Mbuti.DG	-0.005043	-9.501	8265	8804	106708
Buryat.SG	Naxi.DG	Han_Liaoning	Mbuti.DG	-0.003614	-9.483	8304	8690	106722
Yakut.DG	Japanese.DG	Han_Liaoning	Mbuti.DG	-0.00396	-9.458	8272	8695	106702
Surui.DG	Xibo.DG	Han_Liaoning	Mbuti.DG	-0.005097	-9.437	8280	8824	106708
Tu.DG	CHB.SG	Han_Liaoning	Mbuti.DG	-0.002965	-9.388	8286	8602	106715
Buryat.SG	Miao.DG	Han_Liaoning	Mbuti.DG	-0.004063	-9.348	8271	8705	106717
Uyghur.DG	Altaian.DG	Han_Liaoning	Mbuti.DG	-0.005405	-9.304	8344	8920	106553
Altaian.DG	Atayal.DG	Han_Liaoning	Mbuti.DG	-0.006078	-9.284	8275	8922	106383
French.DG	Australian.DG	Han_Liaoning	Mbuti.DG	-0.005304	-9.28	8595	9161	106689
Mongolian_FX	JPT.SG	Han_Liaoning	Mbuti.DG	-0.001127	-9.228	8359	8480	106725
Buryat.SG	Japanese.DG	Han_Liaoning	Mbuti.DG	-0.003656	-9.194	8277	8667	106719
Spanish.DG	Papuan.DG	Han_Liaoning	Mbuti.DG	-0.005426	-9.186	8600	9179	106705
Tu.DG	CHS.SG	Han_Liaoning	Mbuti.DG	-0.002938	-9.172	8292	8605	106715
Australian.DG	Uyghur.DG	Han_Liaoning	Mbuti.DG	-0.005304	-9.148	8584	9150	106682
Thai.DG	Naxi.DG	Han_Liaoning	Mbuti.DG	-0.003477	-9.105	8300	8671	106706
Surui.DG	Oroqen.DG	Han_Liaoning	Mbuti.DG	-0.004753	-9.054	8183	8690	106701
Altaian.DG	Oroqen.DG	Han_Liaoning	Mbuti.DG	-0.005097	-9.034	8144	8687	106550
Yakut.DG	Ami.DG	Han_Liaoning	Mbuti.DG	-0.004189	-9.033	8323	8770	106703
Yakut.DG	Yi.DG	Han_Liaoning	Mbuti.DG	-0.003951	-9.023	8310	8732	106700
Sherpa.DG	CHB.SG	Han_Liaoning	Mbuti.DG	-0.002976	-8.929	8282	8599	106719
Uyghur.DG	Mixe.DG	Han_Liaoning	Mbuti.DG	-0.004472	-8.839	8404	8881	106712
Surui.DG	Atayal.DG	Han_Liaoning	Mbuti.DG	-0.005691	-8.838	8325	8932	106537
Thai.DG	Japanese.DG	Han_Liaoning	Mbuti.DG	-0.003519	-8.816	8305	8680	106702
Sherpa.DG	CHS.SG	Han_Liaoning	Mbuti.DG	-0.002951	-8.805	8294	8609	106719
Surui.DG	Kinh.DG	Han_Liaoning	Mbuti.DG	-0.005036	-8.805	8376	8913	106699
English.DG	Papuan.DG	Han_Liaoning	Mbuti.DG	-0.004962	-8.739	8610	9140	106714
Buryat.SG	Ami.DG	Han_Liaoning	Mbuti.DG	-0.003888	-8.722	8340	8755	106718
Buryat.SG	Yi.DG	Han_Liaoning	Mbuti.DG	-0.003652	-8.638	8279	8668	106717
Dai.DG	Manchu_Liaoning	Han_Liaoning	Mbuti.DG	-0.001768	-8.612	8304	8493	106701
Thai.DG	Yi.DG	Han_Liaoning	Mbuti.DG	-0.003514	-8.556	8280	8655	106700
Thai.DG	Ami.DG	Han_Liaoning	Mbuti.DG	-0.00375	-8.459	8155	8555	106702
Tibetan.DG	She.DG	Han_Liaoning	Mbuti.DG	-0.003644	-8.456	8272	8661	106690
Altaian.DG	Ulchi.DG	Han_Liaoning	Mbuti.DG	-0.00479	-8.453	8216	8727	106552
Tu.DG	Manchu_Liaoning	Han_Liaoning	Mbuti.DG	-0.002608	-8.431	8298	8576	106691
China_Lahu.DG	CHB.SG	Han_Liaoning	Mbuti.DG	-0.002637	-8.427	8254	8535	106717
Altaian.DG	Daur.DG	Han_Liaoning	Mbuti.DG	-0.005365	-8.407	8200	8770	106297
Turkish.DG	Australian.DG	Han_Liaoning	Mbuti.DG	-0.005152	-8.385	8611	9160	106685
Surui.DG	Daur.DG	Han_Liaoning	Mbuti.DG	-0.00503	-8.338	8232	8768	106447
Surui.DG	Ulchi.DG	Han_Liaoning	Mbuti.DG	-0.004438	-8.338	8190	8663	106702
China_Lahu.DG	CHS.SG	Han_Liaoning	Mbuti.DG	-0.002611	-8.335	8222	8501	106717
Tu.DG	Han.DG	Han_Liaoning	Mbuti.DG	-0.003228	-8.315	8243	8588	106715
Even.DG	She.DG	Han_Liaoning	Mbuti.DG	-0.003742	-8.287	8309	8708	106699
Ulchi.DG	CHB.SG	Han_Liaoning	Mbuti.DG	-0.002617	-8.233	8300	8579	106711
Mixe.DG	Buryat.SG	Han_Liaoning	Mbuti.DG	-0.00365	-8.216	8301	8690	106721
Surui.DG	China_Lahu.DG	Han_Liaoning	Mbuti.DG	-0.004432	-8.103	8401	8874	106707
Sherpa.DG	Han.DG	Han_Liaoning	Mbuti.DG	-0.003241	-8.073	8238	8584	106719
French.DG	Papuan.DG	Han_Liaoning	Mbuti.DG	-0.004446	-8.062	8652	9126	106720
Ulchi.DG	CHS.SG	Han_Liaoning	Mbuti.DG	-0.002593	-8.012	8314	8591	106711
Altaian.DG	China_Lahu.DG	Han_Liaoning	Mbuti.DG	-0.004774	-7.988	8364	8872	106554
Mixe.DG	Thai.DG	Han_Liaoning	Mbuti.DG	-0.003787	-7.948	8484	8888	106704
Sherpa.DG	Manchu_Liaoning	Han_Liaoning	Mbuti.DG	-0.002624	-7.92	8291	8571	106695
Altaian.DG	Tu.DG	Han_Liaoning	Mbuti.DG	-0.004441	-7.784	8351	8824	106555
Dai.DG	Han.DG	Han_Liaoning	Mbuti.DG	-0.002384	-7.779	8192	8446	106725
Altaian.DG	Sherpa.DG	Han_Liaoning	Mbuti.DG	-0.00444	-7.674	8336	8809	106558
Tu.DG	JPT.SG	Han_Liaoning	Mbuti.DG	-0.002461	-7.591	8356	8618	106715
Surui.DG	Sherpa.DG	Han_Liaoning	Mbuti.DG	-0.004081	-7.532	8363	8799	106710
Even.DG	Korean.DG	Han_Liaoning	Mbuti.DG	-0.003304	-7.523	8273	8625	106716
Tibetan.DG	Miao.DG	Han_Liaoning	Mbuti.DG	-0.003129	-7.518	8270	8603	106708
Tibetan.DG	Korean.DG	Han_Liaoning	Mbuti.DG	-0.003202	-7.513	8294	8635	106706
China_Lahu.DG	Han.DG	Han_Liaoning	Mbuti.DG	-0.002901	-7.469	8218	8528	106717
Dai.DG	JPT.SG	Han_Liaoning	Mbuti.DG	-0.001617	-7.42	8349	8521	106725
Yakut.DG	Dai.DG	Han_Liaoning	Mbuti.DG	-0.002877	-7.401	8416	8723	106707
Mongolian_FX	Han.DG	Han_Liaoning	Mbuti.DG	-0.001895	-7.387	8267	8469	106725
Buryat.SG	Dai.DG	Han_Liaoning	Mbuti.DG	-0.00257	-7.374	8420	8694	106725
China_Lahu.DG	Manchu_Liaoning	Han_Liaoning	Mbuti.DG	-0.002283	-7.349	8286	8530	106693
Even.DG	Tujia.DG	Han_Liaoning	Mbuti.DG	-0.003211	-7.345	8343	8686	106712
Surui.DG	Tu.DG	Han_Liaoning	Mbuti.DG	-0.004096	-7.335	8400	8837	106708
Even.DG	Miao.DG	Han_Liaoning	Mbuti.DG	-0.003237	-7.303	8310	8655	106717
Sherpa.DG	JPT.SG	Han_Liaoning	Mbuti.DG	-0.002475	-7.295	8354	8619	106719
Thai.DG	Dai.DG	Han_Liaoning	Mbuti.DG	-0.002434	-7.268	8229	8489	106708
Yakut.DG	Igorot.DG	Han_Liaoning	Mbuti.DG	-0.003311	-7.244	8406	8760	106691
Oroqen.DG	CHB.SG	Han_Liaoning	Mbuti.DG	-0.002315	-7.238	8300	8547	106710
Turkish.DG	Papuan.DG	Han_Liaoning	Mbuti.DG	-0.004303	-7.219	8653	9112	106716
Tibetan.DG	Tujia.DG	Han_Liaoning	Mbuti.DG	-0.003106	-7.212	8301	8633	106703
Yakut.DG	Hezhen.DG	Han_Liaoning	Mbuti.DG	-0.00303	-7.119	8199	8522	106702
Ulchi.DG	Manchu_Liaoning	Han_Liaoning	Mbuti.DG	-0.002265	-7.104	8308	8549	106687
Tibetan.DG	Naxi.DG	Han_Liaoning	Mbuti.DG	-0.002688	-7.102	8277	8564	106712
Ulchi.DG	Han.DG	Han_Liaoning	Mbuti.DG	-0.002884	-7.101	8278	8586	106711
Oroqen.DG	CHS.SG	Han_Liaoning	Mbuti.DG	-0.002288	-7.064	8313	8557	106710
Mixe.DG	Yakut.DG	Han_Liaoning	Mbuti.DG	-0.003342	-7.032	8300	8657	106704
Yakut.DG	Xibo.DG	Han_Liaoning	Mbuti.DG	-0.003031	-6.96	8278	8601	106700
Yakut.DG	Atayal.DG	Han_Liaoning	Mbuti.DG	-0.00362	-6.951	8373	8759	106530
Buryat.SG	Xibo.DG	Han_Liaoning	Mbuti.DG	-0.002729	-6.928	8287	8578	106716
Kinh.DG	CHB.SG	Han_Liaoning	Mbuti.DG	-0.002016	-6.908	8271	8486	106707
Even.DG	Japanese.DG	Han_Liaoning	Mbuti.DG	-0.002831	-6.901	8270	8572	106719
Buryat.SG	Igorot.DG	Han_Liaoning	Mbuti.DG	-0.003009	-6.858	8377	8698	106707
Kinh.DG	CHS.SG	Han_Liaoning	Mbuti.DG	-0.001993	-6.844	8228	8440	106707
Yakut.DG	Mongola.DG	Han_Liaoning	Mbuti.DG	-0.002966	-6.829	8314	8630	106702
Even.DG	Mongolian_FX	Han_Liaoning	Mbuti.DG	-0.002238	-6.828	8321	8560	106724
Tu.DG	She.DG	Han_Liaoning	Mbuti.DG	-0.002837	-6.823	8281	8584	106690
Xibo.DG	CHB.SG	Han_Liaoning	Mbuti.DG	-0.001962	-6.813	8296	8505	106716
Thai.DG	Igorot.DG	Han_Liaoning	Mbuti.DG	-0.002873	-6.796	8201	8507	106690
Tibetan.DG	Mongolian_FX	Han_Liaoning	Mbuti.DG	-0.002137	-6.719	8362	8590	106714
Mongola.DG	CHB.SG	Han_Liaoning	Mbuti.DG	-0.002023	-6.712	8289	8505	106717
Even.DG	Naxi.DG	Han_Liaoning	Mbuti.DG	-0.00279	-6.691	8350	8648	106721
Buryat.SG	Hezhen.DG	Han_Liaoning	Mbuti.DG	-0.002726	-6.665	8212	8503	106718
Ulchi.DG	JPT.SG	Han_Liaoning	Mbuti.DG	-0.002114	-6.659	8283	8509	106711
Tibetan.DG	Japanese.DG	Han_Liaoning	Mbuti.DG	-0.002726	-6.655	8336	8627	106709
China_Lahu.DG	JPT.SG	Han_Liaoning	Mbuti.DG	-0.002136	-6.64	8331	8559	106717
Tajik.DG	Australian.DG	Han_Liaoning	Mbuti.DG	-0.003919	-6.635	8652	9070	106686
Tibetan.DG	Ami.DG	Han_Liaoning	Mbuti.DG	-0.002968	-6.632	8359	8676	106708
Mongola.DG	CHS.SG	Han_Liaoning	Mbuti.DG	-0.001998	-6.609	8292	8506	106717
Hezhen.DG	CHB.SG	Han_Liaoning	Mbuti.DG	-0.001962	-6.59	8302	8511	106718
Xibo.DG	CHS.SG	Han_Liaoning	Mbuti.DG	-0.001938	-6.583	8308	8515	106716
Sherpa.DG	She.DG	Han_Liaoning	Mbuti.DG	-0.002848	-6.503	8299	8603	106695
Yakut.DG	Kinh.DG	Han_Liaoning	Mbuti.DG	-0.00297	-6.503	8436	8753	106689
Tibetan.DG	Yi.DG	Han_Liaoning	Mbuti.DG	-0.002724	-6.486	8266	8557	106708
Even.DG	Yi.DG	Han_Liaoning	Mbuti.DG	-0.00283	-6.484	8311	8613	106716
Buryat.SG	Mongola.DG	Han_Liaoning	Mbuti.DG	-0.002665	-6.453	8300	8585	106717
Altaian.DG	Even.DG	Han_Liaoning	Mbuti.DG	-0.003533	-6.432	8216	8592	106562
Altaian.DG	Tibetan.DG	Han_Liaoning	Mbuti.DG	-0.003649	-6.423	8393	8782	106553
Hezhen.DG	CHS.SG	Han_Liaoning	Mbuti.DG	-0.001936	-6.411	8318	8525	106718
Even.DG	Ami.DG	Han_Liaoning	Mbuti.DG	-0.003066	-6.404	8371	8698	106718
Thai.DG	Kinh.DG	Han_Liaoning	Mbuti.DG	-0.002533	-6.357	8251	8521	106690
Thai.DG	Hezhen.DG	Han_Liaoning	Mbuti.DG	-0.002599	-6.337	8381	8658	106702
Thai.DG	Xibo.DG	Han_Liaoning	Mbuti.DG	-0.002593	-6.323	8381	8658	106700
Oroqen.DG	Han.DG	Han_Liaoning	Mbuti.DG	-0.002581	-6.313	8272	8548	106710
Buryat.SG	Atayal.DG	Han_Liaoning	Mbuti.DG	-0.003321	-6.268	8359	8713	106545
Buryat.SG	Kinh.DG	Han_Liaoning	Mbuti.DG	-0.002675	-6.242	8428	8714	106707
Kinh.DG	Han.DG	Han_Liaoning	Mbuti.DG	-0.002282	-6.234	8188	8432	106707
Thai.DG	Atayal.DG	Han_Liaoning	Mbuti.DG	-0.003182	-6.2	8171	8510	106529
Oroqen.DG	Manchu_Liaoning	Han_Liaoning	Mbuti.DG	-0.001961	-6.189	8304	8513	106686
Yakut.DG	Oroqen.DG	Han_Liaoning	Mbuti.DG	-0.002679	-6.171	8136	8422	106695
Surui.DG	Tibetan.DG	Han_Liaoning	Mbuti.DG	-0.003294	-6.159	8420	8772	106705
Thai.DG	Mongola.DG	Han_Liaoning	Mbuti.DG	-0.002533	-6.101	8379	8649	106702
China_Lahu.DG	She.DG	Han_Liaoning	Mbuti.DG	-0.002522	-6.02	8226	8495	106691
Buryat.SG	Oroqen.DG	Han_Liaoning	Mbuti.DG	-0.002375	-5.999	8176	8430	106710
Xibo.DG	Han.DG	Han_Liaoning	Mbuti.DG	-0.002226	-5.997	8267	8504	106716
Surui.DG	Even.DG	Han_Liaoning	Mbuti.DG	-0.003195	-5.946	8229	8570	106714
Hezhen.DG	Han.DG	Han_Liaoning	Mbuti.DG	-0.002226	-5.828	8278	8516	106718
Tu.DG	Korean.DG	Han_Liaoning	Mbuti.DG	-0.002404	-5.808	8327	8584	106708
Mongola.DG	Han.DG	Han_Liaoning	Mbuti.DG	-0.002288	-5.797	8256	8501	106717
Dai.DG	She.DG	Han_Liaoning	Mbuti.DG	-0.001992	-5.707	8192	8405	106699
Yakut.DG	Daur.DG	Han_Liaoning	Mbuti.DG	-0.002943	-5.699	8251	8565	106442
Spanish.DG	Tajik.DG	Han_Liaoning	Mbuti.DG	-0.00237	-5.68	8051	8303	106701
Oroqen.DG	JPT.SG	Han_Liaoning	Mbuti.DG	-0.00181	-5.643	8306	8499	106710
Kinh.DG	Manchu_Liaoning	Han_Liaoning	Mbuti.DG	-0.001659	-5.628	8303	8481	106683
Ulchi.DG	She.DG	Han_Liaoning	Mbuti.DG	-0.002491	-5.618	8323	8589	106687
Mongola.DG	Manchu_Liaoning	Han_Liaoning	Mbuti.DG	-0.00168	-5.573	8300	8479	106693
Xibo.DG	Manchu_Liaoning	Han_Liaoning	Mbuti.DG	-0.001608	-5.56	8305	8477	106692
Tu.DG	Tujia.DG	Han_Liaoning	Mbuti.DG	-0.002301	-5.523	8321	8566	106704
Yakut.DG	Ulchi.DG	Han_Liaoning	Mbuti.DG	-0.002374	-5.501	8189	8442	106696
Sherpa.DG	Korean.DG	Han_Liaoning	Mbuti.DG	-0.002414	-5.434	8306	8564	106713
Hezhen.DG	Manchu_Liaoning	Han_Liaoning	Mbuti.DG	-0.001609	-5.422	8310	8482	106694
Tu.DG	Miao.DG	Han_Liaoning	Mbuti.DG	-0.002334	-5.421	8292	8541	106709
Tajik.DG	Papuan.DG	Han_Liaoning	Mbuti.DG	-0.003064	-5.411	8704	9031	106715
Igorot.DG	CHB.SG	Han_Liaoning	Mbuti.DG	-0.001679	-5.381	8278	8458	106707
Igorot.DG	CHS.SG	Han_Liaoning	Mbuti.DG	-0.001654	-5.348	8223	8400	106707
Sherpa.DG	Miao.DG	Han_Liaoning	Mbuti.DG	-0.002343	-5.334	8305	8555	106712
Yakut.DG	China_Lahu.DG	Han_Liaoning	Mbuti.DG	-0.002359	-5.224	8445	8697	106700
Buryat.SG	Daur.DG	Han_Liaoning	Mbuti.DG	-0.002627	-5.204	8253	8533	106456
Sherpa.DG	Tujia.DG	Han_Liaoning	Mbuti.DG	-0.00232	-5.198	8343	8591	106707
Oroqen.DG	She.DG	Han_Liaoning	Mbuti.DG	-0.00219	-5.178	8336	8569	106685
Thai.DG	Oroqen.DG	Han_Liaoning	Mbuti.DG	-0.002231	-5.173	8422	8660	106695
Buryat.SG	Ulchi.DG	Han_Liaoning	Mbuti.DG	-0.002076	-5.132	8194	8415	106711
Altaian.DG	Buryat.SG	Han_Liaoning	Mbuti.DG	-0.00271	-5.064	8310	8599	106562
Igorot.DG	Han.DG	Han_Liaoning	Mbuti.DG	-0.001942	-5.026	8224	8431	106707
Manchu_Liaoning	CHB.SG	Han_Liaoning	Mbuti.DG	-0.000354	-5.021	8327	8365	106701
Altaian.DG	Thai.DG	Han_Liaoning	Mbuti.DG	-0.002839	-5.008	8511	8813	106547
Xibo.DG	JPT.SG	Han_Liaoning	Mbuti.DG	-0.00146	-4.984	8331	8487	106716
JPT.SG	CHB.SG	Han_Liaoning	Mbuti.DG	-0.000502	-4.977	8322	8376	106725
China_Lahu.DG	Miao.DG	Han_Liaoning	Mbuti.DG	-0.002006	-4.975	8213	8428	106709
Kinh.DG	JPT.SG	Han_Liaoning	Mbuti.DG	-0.001515	-4.96	8351	8512	106707
Ulchi.DG	Korean.DG	Han_Liaoning	Mbuti.DG	-0.002051	-4.96	8278	8496	106705
Thai.DG	Daur.DG	Han_Liaoning	Mbuti.DG	-0.00251	-4.941	8366	8633	106441
Tu.DG	Ami.DG	Han_Liaoning	Mbuti.DG	-0.002161	-4.938	8339	8570	106712
China_Lahu.DG	Korean.DG	Han_Liaoning	Mbuti.DG	-0.002063	-4.937	8315	8535	106708
Buryat.SG	China_Lahu.DG	Han_Liaoning	Mbuti.DG	-0.002051	-4.913	8415	8634	106717
Daur.DG	CHB.SG	Han_Liaoning	Mbuti.DG	-0.002044	-4.91	8275	8492	106456
Daur.DG	Han.DG	Han_Liaoning	Mbuti.DG	-0.002292	-4.877	8244	8488	106456
Mongola.DG	JPT.SG	Han_Liaoning	Mbuti.DG	-0.001521	-4.873	8336	8498	106717
Sherpa.DG	Naxi.DG	Han_Liaoning	Mbuti.DG	-0.0019	-4.872	8284	8487	106717
Tu.DG	Naxi.DG	Han_Liaoning	Mbuti.DG	-0.001888	-4.864	8339	8541	106713
Hezhen.DG	JPT.SG	Han_Liaoning	Mbuti.DG	-0.00146	-4.858	8315	8470	106718
Daur.DG	CHS.SG	Han_Liaoning	Mbuti.DG	-0.00201	-4.826	8282	8496	106456
Mongolian_FX	She.DG	Han_Liaoning	Mbuti.DG	-0.001503	-4.817	8306	8466	106699
Even.DG	Igorot.DG	Han_Liaoning	Mbuti.DG	-0.002187	-4.796	8403	8637	106707
Tu.DG	Japanese.DG	Han_Liaoning	Mbuti.DG	-0.001925	-4.784	8364	8570	106710
Sherpa.DG	Ami.DG	Han_Liaoning	Mbuti.DG	-0.002175	-4.741	8395	8628	106715
Surui.DG	Thai.DG	Han_Liaoning	Mbuti.DG	-0.002509	-4.734	8510	8778	106698
Ulchi.DG	Miao.DG	Han_Liaoning	Mbuti.DG	-0.001994	-4.695	8314	8527	106706
Yakut.DG	Tu.DG	Han_Liaoning	Mbuti.DG	-0.00203	-4.676	8422	8638	106699
Mongola.DG	She.DG	Han_Liaoning	Mbuti.DG	-0.001898	-4.672	8297	8499	106693
Tu.DG	Yi.DG	Han_Liaoning	Mbuti.DG	-0.001923	-4.655	8326	8532	106709
English.DG	Tajik.DG	Han_Liaoning	Mbuti.DG	-0.001899	-4.655	8025	8228	106710
Ulchi.DG	Tujia.DG	Han_Liaoning	Mbuti.DG	-0.001967	-4.646	8341	8551	106701
China_Lahu.DG	Tujia.DG	Han_Liaoning	Mbuti.DG	-0.001985	-4.642	8249	8461	106704
Kinh.DG	She.DG	Han_Liaoning	Mbuti.DG	-0.001895	-4.636	8212	8414	106682
Tibetan.DG	Igorot.DG	Han_Liaoning	Mbuti.DG	-0.002095	-4.591	8459	8683	106698
Sherpa.DG	Japanese.DG	Han_Liaoning	Mbuti.DG	-0.001945	-4.583	8369	8577	106714
Surui.DG	Buryat.SG	Han_Liaoning	Mbuti.DG	-0.00237	-4.571	8382	8635	106714
Sherpa.DG	Yi.DG	Han_Liaoning	Mbuti.DG	-0.001936	-4.546	8282	8489	106712
Thai.DG	Ulchi.DG	Han_Liaoning	Mbuti.DG	-0.00193	-4.487	8467	8673	106694
Even.DG	Mongola.DG	Han_Liaoning	Mbuti.DG	-0.001845	-4.466	8319	8516	106717
Dai.DG	Korean.DG	Han_Liaoning	Mbuti.DG	-0.001554	-4.453	8327	8493	106716
Even.DG	Hezhen.DG	Han_Liaoning	Mbuti.DG	-0.001904	-4.436	8160	8363	106718
Even.DG	Xibo.DG	Han_Liaoning	Mbuti.DG	-0.001902	-4.423	8297	8500	106715
Even.DG	Dai.DG	Han_Liaoning	Mbuti.DG	-0.001748	-4.418	8455	8642	106724
Thai.DG	China_Lahu.DG	Han_Liaoning	Mbuti.DG	-0.001912	-4.416	8294	8498	106701
Tibetan.DG	Atayal.DG	Han_Liaoning	Mbuti.DG	-0.002404	-4.411	8409	8665	106537
Xibo.DG	She.DG	Han_Liaoning	Mbuti.DG	-0.001839	-4.41	8315	8512	106692
Naxi.DG	CHB.SG	Han_Liaoning	Mbuti.DG	-0.001075	-4.403	8332	8447	106722
Tibetan.DG	Xibo.DG	Han_Liaoning	Mbuti.DG	-0.001804	-4.396	8365	8557	106706
Even.DG	Atayal.DG	Han_Liaoning	Mbuti.DG	-0.002515	-4.38	8372	8640	106545
Tibetan.DG	Dai.DG	Han_Liaoning	Mbuti.DG	-0.001649	-4.368	8449	8625	106714
Dai.DG	Miao.DG	Han_Liaoning	Mbuti.DG	-0.001488	-4.366	8236	8395	106717
Hezhen.DG	She.DG	Han_Liaoning	Mbuti.DG	-0.001838	-4.358	8317	8513	106695
Dai.DG	Tujia.DG	Han_Liaoning	Mbuti.DG	-0.001461	-4.354	8251	8407	106712
Yakut.DG	Sherpa.DG	Han_Liaoning	Mbuti.DG	-0.002019	-4.341	8438	8653	106703
Altaian.DG	Yakut.DG	Han_Liaoning	Mbuti.DG	-0.002396	-4.29	8320	8575	106548
Igorot.DG	Manchu_Liaoning	Han_Liaoning	Mbuti.DG	-0.001331	-4.23	8317	8460	106683
Naxi.DG	CHS.SG	Han_Liaoning	Mbuti.DG	-0.001049	-4.223	8334	8446	106722
JPT.SG	CHS.SG	Han_Liaoning	Mbuti.DG	-0.000476	-4.219	8329	8380	106725
Tu.DG	Mongolian_FX	Han_Liaoning	Mbuti.DG	-0.001334	-4.199	8393	8536	106715
Tibetan.DG	Mongola.DG	Han_Liaoning	Mbuti.DG	-0.001744	-4.199	8373	8559	106707
China_Lahu.DG	Ami.DG	Han_Liaoning	Mbuti.DG	-0.001838	-4.194	8225	8421	106711
China_Lahu.DG	Naxi.DG	Han_Liaoning	Mbuti.DG	-0.001562	-4.173	8325	8492	106715
Oroqen.DG	Korean.DG	Han_Liaoning	Mbuti.DG	-0.001753	-4.168	8299	8486	106701
Tibetan.DG	Hezhen.DG	Han_Liaoning	Mbuti.DG	-0.001803	-4.162	8374	8566	106709
Tibetan.DG	Kinh.DG	Han_Liaoning	Mbuti.DG	-0.001745	-4.138	8406	8592	106697
Buryat.SG	Tu.DG	Han_Liaoning	Mbuti.DG	-0.001725	-4.117	8436	8620	106715
Daur.DG	Manchu_Liaoning	Han_Liaoning	Mbuti.DG	-0.001692	-4.099	8284	8464	106432
Ulchi.DG	Ami.DG	Han_Liaoning	Mbuti.DG	-0.001822	-4.082	8355	8549	106708
Naxi.DG	Han.DG	Han_Liaoning	Mbuti.DG	-0.001338	-4.002	8284	8427	106722
Even.DG	Kinh.DG	Han_Liaoning	Mbuti.DG	-0.001846	-3.994	8452	8649	106706
Sherpa.DG	Mongolian_FX	Han_Liaoning	Mbuti.DG	-0.001348	-3.987	8388	8532	106719
Ulchi.DG	Naxi.DG	Han_Liaoning	Mbuti.DG	-0.001544	-3.969	8376	8541	106709
Japanese.DG	CHB.SG	Han_Liaoning	Mbuti.DG	-0.001035	-3.967	8309	8419	106719
Oroqen.DG	Tujia.DG	Han_Liaoning	Mbuti.DG	-0.001652	-3.965	8343	8520	106699
China_Lahu.DG	Yi.DG	Han_Liaoning	Mbuti.DG	-0.001595	-3.956	8262	8432	106709
Ulchi.DG	Japanese.DG	Han_Liaoning	Mbuti.DG	-0.00158	-3.945	8271	8440	106707
China_Lahu.DG	Japanese.DG	Han_Liaoning	Mbuti.DG	-0.001597	-3.921	8348	8518	106711
Even.DG	Oroqen.DG	Han_Liaoning	Mbuti.DG	-0.001552	-3.886	8017	8182	106709
Manchu_Liaoning	CHS.SG	Han_Liaoning	Mbuti.DG	-0.000328	-3.859	8330	8365	106701
Surui.DG	Yakut.DG	Han_Liaoning	Mbuti.DG	-0.002067	-3.819	8368	8589	106698
Oroqen.DG	Miao.DG	Han_Liaoning	Mbuti.DG	-0.001685	-3.815	8329	8508	106703
Japanese.DG	CHS.SG	Han_Liaoning	Mbuti.DG	-0.00101	-3.793	8305	8413	106719
Ulchi.DG	Yi.DG	Han_Liaoning	Mbuti.DG	-0.001576	-3.776	8359	8527	106706
Thai.DG	Tu.DG	Han_Liaoning	Mbuti.DG	-0.001594	-3.762	8466	8636	106699
Buryat.SG	Sherpa.DG	Han_Liaoning	Mbuti.DG	-0.001711	-3.747	8437	8620	106719
Daur.DG	JPT.SG	Han_Liaoning	Mbuti.DG	-0.001538	-3.729	8314	8478	106456
Daur.DG	She.DG	Han_Liaoning	Mbuti.DG	-0.001907	-3.728	8267	8470	106432
French.DG	Tajik.DG	Han_Liaoning	Mbuti.DG	-0.00139	-3.728	8101	8249	106715
Dai.DG	Ami.DG	Han_Liaoning	Mbuti.DG	-0.001318	-3.681	8181	8322	106718
Yi.DG	CHB.SG	Han_Liaoning	Mbuti.DG	-0.001038	-3.625	8310	8420	106717
Igorot.DG	She.DG	Han_Liaoning	Mbuti.DG	-0.001553	-3.617	8233	8399	106684
Japanese.DG	Han.DG	Han_Liaoning	Mbuti.DG	-0.0013	-3.613	8283	8422	106719
Mongolian_FX	Korean.DG	Han_Liaoning	Mbuti.DG	-0.001064	-3.588	8330	8443	106716
Thai.DG	Sherpa.DG	Han_Liaoning	Mbuti.DG	-0.001575	-3.581	8478	8646	106704
Xibo.DG	Korean.DG	Han_Liaoning	Mbuti.DG	-0.001397	-3.576	8298	8447	106707
Igorot.DG	JPT.SG	Han_Liaoning	Mbuti.DG	-0.001177	-3.572	8353	8479	106707
Kinh.DG	Korean.DG	Han_Liaoning	Mbuti.DG	-0.001453	-3.564	8325	8480	106700
Yi.DG	CHS.SG	Han_Liaoning	Mbuti.DG	-0.001013	-3.55	8308	8416	106717
Yi.DG	Han.DG	Han_Liaoning	Mbuti.DG	-0.001301	-3.528	8281	8420	106717
Dai.DG	Japanese.DG	Han_Liaoning	Mbuti.DG	-0.001083	-3.476	8338	8453	106719
Mongola.DG	Korean.DG	Han_Liaoning	Mbuti.DG	-0.001455	-3.473	8334	8489	106711
Tibetan.DG	Daur.DG	Han_Liaoning	Mbuti.DG	-0.001726	-3.472	8349	8533	106447
Dai.DG	Naxi.DG	Han_Liaoning	Mbuti.DG	-0.001042	-3.449	8369	8480	106722
Mongola.DG	Miao.DG	Han_Liaoning	Mbuti.DG	-0.001393	-3.444	8335	8483	106710
Hezhen.DG	Korean.DG	Han_Liaoning	Mbuti.DG	-0.001395	-3.434	8307	8456	106710
Kinh.DG	Miao.DG	Han_Liaoning	Mbuti.DG	-0.001396	-3.411	8232	8381	106701
Atayal.DG	Han.DG	Han_Liaoning	Mbuti.DG	-0.001642	-3.359	8198	8373	106545
Even.DG	Daur.DG	Han_Liaoning	Mbuti.DG	-0.001806	-3.359	8214	8406	106456
Mongola.DG	Tujia.DG	Han_Liaoning	Mbuti.DG	-0.001367	-3.338	8314	8460	106706
Tibetan.DG	Oroqen.DG	Han_Liaoning	Mbuti.DG	-0.001453	-3.322	8371	8526	106701
Oroqen.DG	Ami.DG	Han_Liaoning	Mbuti.DG	-0.001507	-3.302	8385	8546	106704
Kinh.DG	Tujia.DG	Han_Liaoning	Mbuti.DG	-0.001363	-3.275	8265	8410	106694
Dai.DG	Yi.DG	Han_Liaoning	Mbuti.DG	-0.001078	-3.246	8340	8455	106717
Mongolian_FX	Miao.DG	Han_Liaoning	Mbuti.DG	-0.001001	-3.239	8338	8445	106717
Xibo.DG	Tujia.DG	Han_Liaoning	Mbuti.DG	-0.001301	-3.223	8333	8472	106704
Mongolian_FX	Tujia.DG	Han_Liaoning	Mbuti.DG	-0.000973	-3.21	8335	8439	106712
Xibo.DG	Miao.DG	Han_Liaoning	Mbuti.DG	-0.001333	-3.199	8364	8506	106710
Oroqen.DG	Japanese.DG	Han_Liaoning	Mbuti.DG	-0.001279	-3.194	8294	8431	106705
Hezhen.DG	Miao.DG	Han_Liaoning	Mbuti.DG	-0.001338	-3.189	8353	8496	106712
Oroqen.DG	Naxi.DG	Han_Liaoning	Mbuti.DG	-0.00124	-3.168	8383	8516	106709
Mixe.DG	Surui.DG	Han_Liaoning	Mbuti.DG	-0.001276	-3.16	7039	7175	106711
Hezhen.DG	Tujia.DG	Han_Liaoning	Mbuti.DG	-0.001296	-3.156	8363	8501	106706
Atayal.DG	CHB.SG	Han_Liaoning	Mbuti.DG	-0.001367	-3.15	8267	8413	106545
Atayal.DG	CHS.SG	Han_Liaoning	Mbuti.DG	-0.001345	-3.149	8211	8355	106545
Ulchi.DG	Mongolian_FX	Han_Liaoning	Mbuti.DG	-0.000986	-3.149	8355	8461	106711
China_Lahu.DG	Mongolian_FX	Han_Liaoning	Mbuti.DG	-0.001008	-3.113	8387	8495	106717
Oroqen.DG	Yi.DG	Han_Liaoning	Mbuti.DG	-0.001276	-3.08	8335	8471	106703
Tu.DG	Atayal.DG	Han_Liaoning	Mbuti.DG	-0.001599	-3.046	8371	8541	106538
Naxi.DG	Manchu_Liaoning	Han_Liaoning	Mbuti.DG	-0.000719	-3.033	8349	8426	106698
Sherpa.DG	Atayal.DG	Han_Liaoning	Mbuti.DG	-0.001609	-3.013	8388	8559	106541
Even.DG	Ulchi.DG	Han_Liaoning	Mbuti.DG	-0.001249	-3.002	8106	8239	106711

## Sheet: B
Supplymentary Table 6B: The results of f4-statistics in the form of f4 (Ancient population1, Ancient population2; Han_Liaoning, Mbuti) based on 1240k merged dataset
Pop1 (W)	Pop2 (X)	Pop3 (Y)	Pop4 (Z)	D-stat	Z	BABA	ABBA	SNPs
Russia_MLBA_Sintashta	China_YR_LN	Han_Liaoning	Mbuti.DG	-0.022891	-48.256	7794	10202	105160
Russia_MLBA_Sintashta	Mongolia_EIA_SlabGrave_1	Han_Liaoning	Mbuti.DG	-0.019767	-46.018	7631	9661	102717
Russia_MLBA_Sintashta	China_YR_LBIA	Han_Liaoning	Mbuti.DG	-0.022919	-45.914	7716	10113	104551
Russia_MLBA_Sintashta	Taiwan_Hanben_IA	Han_Liaoning	Mbuti.DG	-0.021364	-45.892	7784	10024	104839
Russia_Afanasievo	China_YR_LN	Han_Liaoning	Mbuti.DG	-0.022319	-45.674	7771	10107	104671
Iran_GanjDareh_N	China_YR_LN	Han_Liaoning	Mbuti.DG	-0.02596	-45.252	7276	9856	99357
Iran_GanjDareh_N	China_YR_LBIA	Han_Liaoning	Mbuti.DG	-0.026228	-44.77	7201	9795	98905
Russia_Afanasievo	China_YR_LBIA	Han_Liaoning	Mbuti.DG	-0.022441	-44.62	7699	10035	104090
Iran_GanjDareh_N	Taiwan_Hanben_IA	Han_Liaoning	Mbuti.DG	-0.024569	-44.588	7280	9719	99276
Russia_Afanasievo	Taiwan_Hanben_IA	Han_Liaoning	Mbuti.DG	-0.020791	-44.529	7772	9943	104406
Russia_Afanasievo	Mongolia_EIA_SlabGrave_1	Han_Liaoning	Mbuti.DG	-0.019165	-44.428	7625	9589	102464
Russia_MLBA_Sintashta	China_YR_MN	Han_Liaoning	Mbuti.DG	-0.02304	-44.12	7747	10156	104571
Russia_MLBA_Sintashta	China_Upper_YR_LN	Han_Liaoning	Mbuti.DG	-0.022682	-43.865	7735	10097	104137
Iran_GanjDareh_N	Mongolia_EIA_SlabGrave_1	Han_Liaoning	Mbuti.DG	-0.023105	-43.681	7233	9504	98303
Russia_MLBA_Sintashta	China_NEastAsia_Coastal_EN	Han_Liaoning	Mbuti.DG	-0.022213	-43.277	7244	9415	97755
Russia_Alan.SG	China_YR_LN	Han_Liaoning	Mbuti.DG	-0.023318	-43.23	7815	10283	105849
Iran_GanjDareh_N	China_Upper_YR_LN	Han_Liaoning	Mbuti.DG	-0.025977	-42.967	7217	9774	98446
Iran_TepeAbdulHosein_N.SG	China_YR_LN	Han_Liaoning	Mbuti.DG	-0.025777	-42.734	7145	9680	98360
Iran_GanjDareh_N	China_YR_MN	Han_Liaoning	Mbuti.DG	-0.026203	-42.732	7247	9839	98898
Russia_MLBA_Sintashta	Russia_MN_Boisman	Han_Liaoning	Mbuti.DG	-0.02124	-42.39	7074	9101	95431
Russia_Samara_EBA_Yamnaya	China_YR_LN	Han_Liaoning	Mbuti.DG	-0.022033	-42.345	7615	9868	102265
Russia_Alan.SG	Taiwan_Hanben_IA	Han_Liaoning	Mbuti.DG	-0.021831	-42.234	7810	10107	105236
Russia_Afanasievo	China_YR_MN	Han_Liaoning	Mbuti.DG	-0.022449	-42.212	7730	10067	104107
Russia_Afanasievo	China_Upper_YR_LN	Han_Liaoning	Mbuti.DG	-0.022128	-42.012	7716	10011	103686
Russia_Samara_EBA_Yamnaya	Taiwan_Hanben_IA	Han_Liaoning	Mbuti.DG	-0.020707	-41.586	7603	9716	102050
Russia_Alan.SG	China_YR_LBIA	Han_Liaoning	Mbuti.DG	-0.023481	-41.577	7731	10200	105167
Iran_TepeAbdulHosein_N.SG	China_YR_LBIA	Han_Liaoning	Mbuti.DG	-0.025986	-41.454	7093	9635	97814
Iran_GanjDareh_N	China_NEastAsia_Coastal_EN	Han_Liaoning	Mbuti.DG	-0.025309	-41.387	6900	9293	94542
Russia_Samara_EBA_Yamnaya	China_YR_LBIA	Han_Liaoning	Mbuti.DG	-0.022325	-41.346	7525	9796	101730
Iran_TepeAbdulHosein_N.SG	Taiwan_Hanben_IA	Han_Liaoning	Mbuti.DG	-0.024438	-41.34	7164	9558	97949
Iran_TepeAbdulHosein_N.SG	China_Upper_YR_LN	Han_Liaoning	Mbuti.DG	-0.025729	-41.089	7072	9580	97462
Russia_Alan.SG	China_YR_MN	Han_Liaoning	Mbuti.DG	-0.023525	-40.947	7752	10228	105246
Russia_Samara_EBA_Yamnaya	China_YR_MN	Han_Liaoning	Mbuti.DG	-0.022357	-40.7	7541	9815	101722
Russia_MLBA_Sintashta	Mongolia_LBA_Khovsgol_6	Han_Liaoning	Mbuti.DG	-0.015724	-40.668	7689	9319	103702
Russia_Afanasievo	China_NEastAsia_Coastal_EN	Han_Liaoning	Mbuti.DG	-0.021684	-40.649	7242	9358	97570
Iran_GanjDareh_N	Russia_MN_Boisman	Han_Liaoning	Mbuti.DG	-0.024456	-40.563	6809	9082	92965
Russia_Afanasievo	Russia_MN_Boisman	Han_Liaoning	Mbuti.DG	-0.020669	-40.536	7079	9050	95356
Russia_MLBA_Sintashta	China_Shimao_LN	Han_Liaoning	Mbuti.DG	-0.022714	-40.5	7699	10060	103964
Russia_MLBA_Sintashta	Mongolia_LBA_CenterWest_4	Han_Liaoning	Mbuti.DG	-0.017048	-40.417	7434	9153	100829
Iran_TepeAbdulHosein_N.SG	China_YR_MN	Han_Liaoning	Mbuti.DG	-0.025914	-40.264	7110	9646	97861
Russia_Samara_EBA_Yamnaya	Mongolia_EIA_SlabGrave_1	Han_Liaoning	Mbuti.DG	-0.018992	-40.243	7490	9397	100442
Iran_GanjDareh_N	China_Upper_YR_IA	Han_Liaoning	Mbuti.DG	-0.025959	-40.242	7018	9511	96038
Iran_GanjDareh_N	China_Shimao_LN	Han_Liaoning	Mbuti.DG	-0.025935	-40.143	7229	9779	98310
Russia_Alan.SG	Mongolia_EIA_SlabGrave_1	Han_Liaoning	Mbuti.DG	-0.020231	-40.091	7635	9710	102594
Russia_MLBA_Sintashta	Russia_Buryatia_Xiongnu	Han_Liaoning	Mbuti.DG	-0.019488	-40.075	7398	9347	99978
Iran_GanjDareh_N	Russia_Buryatia_Xiongnu	Han_Liaoning	Mbuti.DG	-0.022759	-40	7029	9217	96112
Russia_Samara_EBA_Yamnaya	China_Upper_YR_LN	Han_Liaoning	Mbuti.DG	-0.021889	-39.981	7510	9728	101300
Russia_Alan.SG	China_Upper_YR_LN	Han_Liaoning	Mbuti.DG	-0.023099	-39.782	7750	10172	104858
Iran_GanjDareh_N	Mongolia_North_N	Han_Liaoning	Mbuti.DG	-0.022813	-39.672	7059	9245	95841
Russia_MLBA_Sintashta	Mongolia_North_N	Han_Liaoning	Mbuti.DG	-0.01978	-39.56	7373	9333	99074
Russia_MLBA_Sintashta	China_AmurRiver_N	Han_Liaoning	Mbuti.DG	-0.021342	-39.493	6159	7926	82783
Russia_Kalmykia_EBA_Yamnaya.SG	Taiwan_Hanben_IA	Han_Liaoning	Mbuti.DG	-0.02136	-39.448	7559	9730	101615
Russia_Kalmykia_EBA_Yamnaya.SG	China_YR_LBIA	Han_Liaoning	Mbuti.DG	-0.023071	-39.419	7469	9810	101455
Russia_Kalmykia_EBA_Yamnaya.SG	China_YR_LN	Han_Liaoning	Mbuti.DG	-0.022821	-39.299	7533	9861	102024
Iran_TepeAbdulHosein_N.SG	Mongolia_EIA_SlabGrave_1	Han_Liaoning	Mbuti.DG	-0.022737	-39.102	7048	9227	95849
Russia_Samara_EBA_Yamnaya	China_NEastAsia_Coastal_EN	Han_Liaoning	Mbuti.DG	-0.021504	-38.961	7166	9237	96311
Russia_Afanasievo	Mongolia_LBA_Khovsgol_6	Han_Liaoning	Mbuti.DG	-0.015231	-38.93	7644	9218	103343
Iran_GanjDareh_N	Mongolia_LBA_Khovsgol_6	Han_Liaoning	Mbuti.DG	-0.019175	-38.902	7288	9180	98692
Iran_TepeAbdulHosein_N.SG	China_Shimao_LN	Han_Liaoning	Mbuti.DG	-0.025883	-38.883	7062	9581	97318
Russia_Afanasievo	China_Shimao_LN	Han_Liaoning	Mbuti.DG	-0.022106	-38.861	7683	9971	103499
Iran_TepeAbdulHosein_N.SG	China_NEastAsia_Coastal_EN	Han_Liaoning	Mbuti.DG	-0.025275	-38.726	6663	8974	91430
Iran_GanjDareh_N	Mongolia_LBA_CenterWest_4	Han_Liaoning	Mbuti.DG	-0.020218	-38.717	7115	9077	97051
Hungary_LateC_EBA_Baden_Yamnaya	China_YR_LN	Han_Liaoning	Mbuti.DG	-0.024884	-38.708	6107	8173	82999
Russia_Afanasievo	Mongolia_LBA_CenterWest_4	Han_Liaoning	Mbuti.DG	-0.016583	-38.703	7405	9074	100628
Russia_MLBA_Sintashta	Mongolia_Tuv_LatEMedieval	Han_Liaoning	Mbuti.DG	-0.020713	-38.647	6878	8814	93424
Russia_MLBA_Sintashta	China_Upper_YR_IA	Han_Liaoning	Mbuti.DG	-0.022586	-38.541	7495	9783	101274
Iran_GanjDareh_N	Russia_DevilsCave_N.SG	Han_Liaoning	Mbuti.DG	-0.024822	-38.501	7300	9766	99349
Iran_GanjDareh_N	China_AmurRiver_N	Han_Liaoning	Mbuti.DG	-0.024326	-38.489	5976	7953	81236
Iran_GanjDareh_N	Mongolia_Tuv_LatEMedieval	Han_Liaoning	Mbuti.DG	-0.02402	-38.448	6640	8821	90794
Russia_MLBA_Sintashta	Russia_DevilsCave_N.SG	Han_Liaoning	Mbuti.DG	-0.021439	-38.358	7851	10106	105175
Russia_Afanasievo	Russia_Buryatia_Xiongnu	Han_Liaoning	Mbuti.DG	-0.018753	-38.33	7387	9257	99738
Russia_Alan.SG	China_NEastAsia_Coastal_EN	Han_Liaoning	Mbuti.DG	-0.022673	-38.218	7223	9433	97467
Russia_Afanasievo	Mongolia_North_N	Han_Liaoning	Mbuti.DG	-0.019243	-38.205	7363	9266	98901
Iran_Wezmeh_N.SG	China_YR_LN	Han_Liaoning	Mbuti.DG	-0.025694	-38.078	7812	10549	106513
Russia_Kalmykia_EBA_Yamnaya.SG	China_YR_MN	Han_Liaoning	Mbuti.DG	-0.022921	-37.988	7482	9809	101487
Russia_MLBA_Sintashta	Nepal_Samdzong_1500BP.SG	Han_Liaoning	Mbuti.DG	-0.019622	-37.946	7877	9940	105174
Iran_GanjDareh_N	China_WLR_LN	Han_Liaoning	Mbuti.DG	-0.026714	-37.925	6141	8382	83899
Hungary_LateC_EBA_Baden_Yamnaya	China_YR_LBIA	Han_Liaoning	Mbuti.DG	-0.02493	-37.882	6093	8156	82716
Iran_GanjDareh_N	Mongolia_East_N	Han_Liaoning	Mbuti.DG	-0.023862	-37.674	6642	8798	90377
Russia_Afanasievo	China_AmurRiver_N	Han_Liaoning	Mbuti.DG	-0.020444	-37.627	6172	7862	82705
Russia_Afanasievo	China_Upper_YR_IA	Han_Liaoning	Mbuti.DG	-0.022032	-37.566	7489	9710	100834
Russia_Alan.SG	China_Shimao_LN	Han_Liaoning	Mbuti.DG	-0.023134	-37.531	7730	10150	104642
Russia_MLBA_Sintashta	China_WLR_LN	Han_Liaoning	Mbuti.DG	-0.023292	-37.522	6431	8463	87259
Russia_Samara_EBA_Yamnaya	Russia_MN_Boisman	Han_Liaoning	Mbuti.DG	-0.020302	-37.434	7001	8909	93992
Iran_GanjDareh_N	Nepal_Samdzong_1500BP.SG	Han_Liaoning	Mbuti.DG	-0.022907	-37.356	7368	9644	99348
Iran_GanjDareh_N	China_WLR_MN	Han_Liaoning	Mbuti.DG	-0.02523	-37.289	7244	9736	98754
Russia_Kalmykia_EBA_Yamnaya.SG	Mongolia_EIA_SlabGrave_1	Han_Liaoning	Mbuti.DG	-0.019623	-37.184	7402	9358	99680
Russia_Afanasievo	Russia_DevilsCave_N.SG	Han_Liaoning	Mbuti.DG	-0.020772	-37.178	7827	10002	104695
Russia_Kalmykia_EBA_Yamnaya.SG	China_Upper_YR_LN	Han_Liaoning	Mbuti.DG	-0.022577	-37.147	7472	9754	101083
Iran_Wezmeh_N.SG	China_YR_LBIA	Han_Liaoning	Mbuti.DG	-0.025806	-37.144	7732	10463	105821
Iran_TepeAbdulHosein_N.SG	Russia_MN_Boisman	Han_Liaoning	Mbuti.DG	-0.024285	-37.141	6527	8695	89262
Russia_Alan.SG	Russia_MN_Boisman	Han_Liaoning	Mbuti.DG	-0.021641	-37.04	7068	9123	94962
Russia_Alan.SG	China_Upper_YR_IA	Han_Liaoning	Mbuti.DG	-0.023133	-37.037	7466	9820	101759
Russia_Andronovo.SG	China_YR_LN	Han_Liaoning	Mbuti.DG	-0.022108	-37.03	7867	10204	105704
Hungary_LateC_EBA_Baden_Yamnaya	Taiwan_Hanben_IA	Han_Liaoning	Mbuti.DG	-0.023384	-37.022	6137	8077	82974
Iran_TepeAbdulHosein_N.SG	China_Upper_YR_IA	Han_Liaoning	Mbuti.DG	-0.025582	-36.855	6865	9289	94751
Russia_MLBA_Sintashta	China_WLR_MN	Han_Liaoning	Mbuti.DG	-0.021921	-36.768	7770	10059	104438
Russia_Samara_EBA_Yamnaya	China_Shimao_LN	Han_Liaoning	Mbuti.DG	-0.021911	-36.589	7523	9739	101137
Hungary_LateC_EBA_Baden_Yamnaya	China_YR_MN	Han_Liaoning	Mbuti.DG	-0.025248	-36.5	6080	8168	82693
Russia_Andronovo.SG	China_YR_LBIA	Han_Liaoning	Mbuti.DG	-0.022269	-36.418	7758	10097	105063
Russia_Afanasievo	China_WLR_MN	Han_Liaoning	Mbuti.DG	-0.021357	-36.41	7729	9949	103963
Russia_Samara_EBA_Yamnaya	China_Upper_YR_IA	Han_Liaoning	Mbuti.DG	-0.021997	-36.388	7302	9472	98647
Iran_Wezmeh_N.SG	Taiwan_Hanben_IA	Han_Liaoning	Mbuti.DG	-0.024208	-36.374	7843	10406	105894
Hungary_LateC_EBA_Baden_Yamnaya	Mongolia_EIA_SlabGrave_1	Han_Liaoning	Mbuti.DG	-0.021801	-36.318	6132	7935	82670
Mongolia_Arkhangai_Xiongnu	China_YR_LN	Han_Liaoning	Mbuti.DG	-0.017855	-36.314	7739	9580	103156
Iran_Wezmeh_N.SG	China_YR_MN	Han_Liaoning	Mbuti.DG	-0.025844	-36.306	7782	10519	105899
Russia_Kalmykia_EBA_Yamnaya.SG	China_NEastAsia_Coastal_EN	Han_Liaoning	Mbuti.DG	-0.021983	-36.28	7092	9184	95184
Iran_Wezmeh_N.SG	China_Upper_YR_LN	Han_Liaoning	Mbuti.DG	-0.025527	-36.177	7736	10429	105512
Luxembourg_Loschbour.DG	China_YR_LN	Han_Liaoning	Mbuti.DG	-0.022483	-36.175	7455	9707	100165
Russia_Andronovo.SG	Taiwan_Hanben_IA	Han_Liaoning	Mbuti.DG	-0.020663	-36.098	7853	10025	105153
Russia_Afanasievo	Mongolia_Tuv_LatEMedieval	Han_Liaoning	Mbuti.DG	-0.020025	-36.081	6906	8774	93280
Russia_Afanasievo	Nepal_Samdzong_1500BP.SG	Han_Liaoning	Mbuti.DG	-0.019066	-36.065	7863	9859	104689
Iran_TepeAbdulHosein_N.SG	Russia_DevilsCave_N.SG	Han_Liaoning	Mbuti.DG	-0.024478	-36.064	7200	9609	98407
Hungary_LateC_EBA_Baden_Yamnaya	China_NEastAsia_Coastal_EN	Han_Liaoning	Mbuti.DG	-0.023858	-36.048	5977	7911	81043
Russia_Samara_EBA_Yamnaya	Mongolia_North_N	Han_Liaoning	Mbuti.DG	-0.019138	-36.025	7256	9119	97337
Iran_GanjDareh_N	China_AmurRiver_Mesolithic	Han_Liaoning	Mbuti.DG	-0.024283	-36.017	5119	6817	69939
Russia_Samara_EBA_Yamnaya	Russia_Buryatia_Xiongnu	Han_Liaoning	Mbuti.DG	-0.018784	-35.987	7275	9115	97950
Russia_Alan.SG	China_AmurRiver_N	Han_Liaoning	Mbuti.DG	-0.021681	-35.912	6132	7918	82366
Iran_TepeAbdulHosein_N.SG	Nepal_Samdzong_1500BP.SG	Han_Liaoning	Mbuti.DG	-0.022697	-35.865	7247	9481	98400
Russia_Alan.SG	Mongolia_North_N	Han_Liaoning	Mbuti.DG	-0.020338	-35.792	7347	9353	98651
Russia_Alan.SG	Russia_Buryatia_Xiongnu	Han_Liaoning	Mbuti.DG	-0.020104	-35.774	7376	9383	99820
Russia_Kalmykia_EBA_Yamnaya.SG	China_Shimao_LN	Han_Liaoning	Mbuti.DG	-0.022782	-35.762	7460	9759	100928
Hungary_LateC_EBA_Baden_Yamnaya	China_Upper_YR_LN	Han_Liaoning	Mbuti.DG	-0.02453	-35.701	6091	8109	82262
Mongolia_Arkhangai_Xiongnu	China_YR_LBIA	Han_Liaoning	Mbuti.DG	-0.017959	-35.696	7673	9516	102599
Russia_Andronovo.SG	China_YR_MN	Han_Liaoning	Mbuti.DG	-0.022269	-35.635	7813	10154	105116
Russia_Andronovo.SG	China_Upper_YR_LN	Han_Liaoning	Mbuti.DG	-0.021912	-35.624	7786	10080	104712
Iran_TepeAbdulHosein_N.SG	Russia_Buryatia_Xiongnu	Han_Liaoning	Mbuti.DG	-0.022529	-35.572	6818	8924	93467
Russia_Alan.SG	Russia_DevilsCave_N.SG	Han_Liaoning	Mbuti.DG	-0.021815	-35.453	7860	10171	105948
Iran_TepeAbdulHosein_N.SG	Mongolia_North_N	Han_Liaoning	Mbuti.DG	-0.022772	-35.414	6812	8919	92537
Russia_Afanasievo	China_WLR_LN	Han_Liaoning	Mbuti.DG	-0.022645	-35.324	6436	8407	87051
Hungary_LateC_EBA_Baden_Yamnaya	Russia_MN_Boisman	Han_Liaoning	Mbuti.DG	-0.02295	-35.271	5959	7807	80532
Iran_TepeAbdulHosein_N.SG	China_AmurRiver_N	Han_Liaoning	Mbuti.DG	-0.024302	-35.265	5715	7603	77699
Russia_MLBA_Sintashta	China_AmurRiver_Mesolithic	Han_Liaoning	Mbuti.DG	-0.020941	-35.171	5280	6763	70822
Mongolia_Arkhangai_Xiongnu	Taiwan_Hanben_IA	Han_Liaoning	Mbuti.DG	-0.016396	-35.151	7792	9479	102911
Russia_Alan.SG	Nepal_Samdzong_1500BP.SG	Han_Liaoning	Mbuti.DG	-0.020072	-35.137	7897	10023	105931
Russia_Kalmykia_EBA_Yamnaya.SG	China_Upper_YR_IA	Han_Liaoning	Mbuti.DG	-0.022357	-35.094	7268	9467	98365
Iran_TepeAbdulHosein_N.SG	China_WLR_MN	Han_Liaoning	Mbuti.DG	-0.024852	-35.073	7145	9574	97758
Russia_MLBA_Sintashta	Mongolia_East_N	Han_Liaoning	Mbuti.DG	-0.020404	-35.066	6922	8814	92732
Russia_Alan.SG	China_WLR_MN	Han_Liaoning	Mbuti.DG	-0.022332	-35.063	7761	10109	105156
Russia_Alan.SG	China_WLR_LN	Han_Liaoning	Mbuti.DG	-0.023819	-34.965	6438	8517	87313
Russia_Kalmykia_EBA_Yamnaya.SG	Russia_MN_Boisman	Han_Liaoning	Mbuti.DG	-0.021127	-34.936	6916	8883	93096
Russia_Samara_EBA_Yamnaya	China_AmurRiver_N	Han_Liaoning	Mbuti.DG	-0.0205	-34.862	6128	7807	81890
Russia_Alan.SG	Mongolia_Tuv_LatEMedieval	Han_Liaoning	Mbuti.DG	-0.021135	-34.852	6870	8838	93098
Russia_Samara_EBA_Yamnaya	Mongolia_Tuv_LatEMedieval	Han_Liaoning	Mbuti.DG	-0.019867	-34.842	6793	8621	91995
Russia_Samara_EBA_Yamnaya	Mongolia_LBA_CenterWest_4	Han_Liaoning	Mbuti.DG	-0.01632	-34.69	7296	8909	98849
Mongolia_EIA_Sagly_4	China_YR_LN	Han_Liaoning	Mbuti.DG	-0.014233	-34.63	7881	9361	103995
Mongolia_Uvs_EIAXiongnuLateMedival	China_YR_LN	Han_Liaoning	Mbuti.DG	-0.015435	-34.605	7818	9419	103759
Iran_TepeAbdulHosein_N.SG	China_WLR_LN	Han_Liaoning	Mbuti.DG	-0.026541	-34.602	5977	8158	82191
Iran_GanjDareh_N	China_AmurRiver_LPaleolithic	Han_Liaoning	Mbuti.DG	-0.023402	-34.598	6096	8018	82142
Iran_GanjDareh_N	Mongolia_Bulgan_Xiongnu	Han_Liaoning	Mbuti.DG	-0.022468	-34.525	6641	8670	90295
Russia_Afanasievo	Mongolia_East_N	Han_Liaoning	Mbuti.DG	-0.019826	-34.493	6926	8763	92639
Iran_Wezmeh_N.SG	Mongolia_EIA_SlabGrave_1	Han_Liaoning	Mbuti.DG	-0.022687	-34.473	7661	10003	103242
Russia_Alan.SG	Mongolia_LBA_Khovsgol_6	Han_Liaoning	Mbuti.DG	-0.016195	-34.451	7714	9396	103828
Luxembourg_Loschbour.DG	China_YR_LBIA	Han_Liaoning	Mbuti.DG	-0.02256	-34.429	7370	9616	99543
Russia_Samara_EBA_Yamnaya	Russia_DevilsCave_N.SG	Han_Liaoning	Mbuti.DG	-0.020607	-34.414	7646	9753	102269
Russia_Alan.SG	Mongolia_LBA_CenterWest_4	Han_Liaoning	Mbuti.DG	-0.017528	-34.391	7426	9189	100545
Hungary_LateC_EBA_Baden_Yamnaya	China_AmurRiver_N	Han_Liaoning	Mbuti.DG	-0.023031	-34.372	5392	7072	72931
Mongolia_Arkhangai_Xiongnu	China_YR_MN	Han_Liaoning	Mbuti.DG	-0.018064	-34.355	7663	9516	102609
Iran_GanjDareh_N	China_AmurRiver_EarlyN	Han_Liaoning	Mbuti.DG	-0.024958	-34.339	5435	7284	74069
Russia_Samara_EBA_Yamnaya	Mongolia_LBA_Khovsgol_6	Han_Liaoning	Mbuti.DG	-0.014889	-34.272	7501	9007	101161
Iran_Hasanlu_IA.SG	China_YR_LN	Han_Liaoning	Mbuti.DG	-0.024349	-34.176	6755	8989	91769
Russia_Samara_EBA_Yamnaya	Nepal_Samdzong_1500BP.SG	Han_Liaoning	Mbuti.DG	-0.018885	-34.059	7693	9624	102267
Russia_Kalmykia_EBA_Yamnaya.SG	Russia_Buryatia_Xiongnu	Han_Liaoning	Mbuti.DG	-0.019487	-34.029	7162	9056	97235
Iran_TepeAbdulHosein_N.SG	Mongolia_Tuv_LatEMedieval	Han_Liaoning	Mbuti.DG	-0.02361	-34.007	6371	8437	87513
Russia_Andronovo.SG	Mongolia_EIA_SlabGrave_1	Han_Liaoning	Mbuti.DG	-0.018976	-34.001	7677	9625	102666
Iran_TepeAbdulHosein_N.SG	Mongolia_LBA_CenterWest_4	Han_Liaoning	Mbuti.DG	-0.020238	-33.982	6908	8813	94135
Iran_TepeAbdulHosein_N.SG	Mongolia_LBA_Khovsgol_6	Han_Liaoning	Mbuti.DG	-0.018814	-33.981	7141	8963	96824
Hungary_LateC_EBA_Baden_Yamnaya	China_Upper_YR_IA	Han_Liaoning	Mbuti.DG	-0.024695	-33.962	5900	7891	80634
Russia_Andronovo.SG	China_NEastAsia_Coastal_EN	Han_Liaoning	Mbuti.DG	-0.02139	-33.94	7247	9335	97613
Iran_Wezmeh_N.SG	China_NEastAsia_Coastal_EN	Han_Liaoning	Mbuti.DG	-0.024914	-33.936	7266	9710	98081
Luxembourg_Loschbour.DG	Taiwan_Hanben_IA	Han_Liaoning	Mbuti.DG	-0.020958	-33.905	7469	9557	99622
Russia_Samara_EBA_Yamnaya	China_WLR_LN	Han_Liaoning	Mbuti.DG	-0.022672	-33.886	6312	8249	85437
Hungary_LateC_EBA_Baden_Yamnaya	China_Shimao_LN	Han_Liaoning	Mbuti.DG	-0.024694	-33.847	6053	8085	82274
Iran_Wezmeh_N.SG	China_Upper_YR_IA	Han_Liaoning	Mbuti.DG	-0.025381	-33.809	7507	10106	102405
Russia_Afanasievo	China_AmurRiver_Mesolithic	Han_Liaoning	Mbuti.DG	-0.020324	-33.794	5289	6728	70797
Russia_Andronovo.SG	Russia_MN_Boisman	Han_Liaoning	Mbuti.DG	-0.020453	-33.728	7078	9025	95194
Russia_Andronovo.SG	China_Shimao_LN	Han_Liaoning	Mbuti.DG	-0.021897	-33.654	7745	10033	104516
Russia_MLBA_Sintashta	China_AmurRiver_EarlyN	Han_Liaoning	Mbuti.DG	-0.021791	-33.648	5571	7207	75102
Iran_TepeAbdulHosein_N.SG	Mongolia_East_N	Han_Liaoning	Mbuti.DG	-0.023498	-33.597	6365	8405	86806
Russia_MLBA_Sintashta	China_AmurRiver_LPaleolithic	Han_Liaoning	Mbuti.DG	-0.020087	-33.566	6331	8014	83795
Iran_GanjDareh_N	Mongolia_Khentii_Xiongnu	Han_Liaoning	Mbuti.DG	-0.024384	-33.552	6282	8367	85481
Mongolia_Arkhangai_Xiongnu	China_Upper_YR_LN	Han_Liaoning	Mbuti.DG	-0.017648	-33.527	7638	9441	102186
Iran_Wezmeh_N.SG	China_Shimao_LN	Han_Liaoning	Mbuti.DG	-0.025505	-33.509	7757	10443	105292
Russia_Andronovo.SG	China_Upper_YR_IA	Han_Liaoning	Mbuti.DG	-0.021924	-33.493	7539	9769	101686
Iran_Wezmeh_N.SG	China_WLR_LN	Han_Liaoning	Mbuti.DG	-0.02634	-33.431	6452	8767	87858
Mongolia_EIA_Sagly_4	China_YR_LBIA	Han_Liaoning	Mbuti.DG	-0.014388	-33.419	7807	9295	103433
Russia_Kalmykia_EBA_Yamnaya.SG	Mongolia_North_N	Han_Liaoning	Mbuti.DG	-0.019777	-33.326	7162	9069	96427
Russia_Samara_EBA_Yamnaya	China_WLR_MN	Han_Liaoning	Mbuti.DG	-0.021105	-33.307	7554	9698	101589
Iran_Hasanlu_IA.SG	China_YR_LBIA	Han_Liaoning	Mbuti.DG	-0.024464	-33.29	6705	8938	91252
Luxembourg_Loschbour.DG	China_YR_MN	Han_Liaoning	Mbuti.DG	-0.022503	-33.285	7352	9593	99601
Russia_MLBA_Sintashta	Mongolia_Bulgan_Xiongnu	Han_Liaoning	Mbuti.DG	-0.019104	-33.244	6892	8672	93184
Russia_Kalmykia_EBA_Yamnaya.SG	China_AmurRiver_N	Han_Liaoning	Mbuti.DG	-0.021416	-33.2	6070	7811	81294
Iran_GanjDareh_N	Mongolia_Tuv_Xiongnu	Han_Liaoning	Mbuti.DG	-0.023963	-33.199	6686	8864	90920
Hungary_LateC_EBA_Baden_Yamnaya	Mongolia_North_N	Han_Liaoning	Mbuti.DG	-0.021436	-33.186	6096	7850	81840
Russia_Kalmykia_EBA_Yamnaya.SG	Russia_DevilsCave_N.SG	Han_Liaoning	Mbuti.DG	-0.021308	-33.146	7580	9755	102062
Hungary_LateC_EBA_Baden_Yamnaya	Mongolia_Tuv_LatEMedieval	Han_Liaoning	Mbuti.DG	-0.022869	-33.138	5793	7593	78718
Mongolia_Uvs_EIAXiongnuLateMedival	China_YR_LBIA	Han_Liaoning	Mbuti.DG	-0.015626	-33.134	7749	9362	103190
Russia_Kalmykia_EBA_Yamnaya.SG	Nepal_Samdzong_1500BP.SG	Han_Liaoning	Mbuti.DG	-0.019479	-33.125	7626	9614	102053
Mongolia_EIA_Sagly_4	Taiwan_Hanben_IA	Han_Liaoning	Mbuti.DG	-0.01274	-33.104	7902	9224	103779
Iran_GanjDareh_N	Mongolia_EBA_Ulgii_1	Han_Liaoning	Mbuti.DG	-0.01935	-33.095	6841	8634	92662
Iran_GanjDareh_N	China_SEastAsia_Coastal_LN	Han_Liaoning	Mbuti.DG	-0.023964	-33.087	4598	6113	63231
Luxembourg_Loschbour.DG	China_NEastAsia_Coastal_EN	Han_Liaoning	Mbuti.DG	-0.021611	-33.069	6938	8941	92681
Russia_Kalmykia_EBA_Yamnaya.SG	Mongolia_LBA_Khovsgol_6	Han_Liaoning	Mbuti.DG	-0.015787	-33.062	7411	8999	100592
Luxembourg_Loschbour.DG	China_Upper_YR_LN	Han_Liaoning	Mbuti.DG	-0.022255	-33.05	7358	9566	99233
Russia_Caucasus_EBA_Yamnaya	China_YR_LN	Han_Liaoning	Mbuti.DG	-0.022871	-33.042	5364	7019	72357
Hungary_LateC_EBA_Baden_Yamnaya	Russia_Buryatia_Xiongnu	Han_Liaoning	Mbuti.DG	-0.021244	-32.945	6026	7760	81602
Iran_Wezmeh_N.SG	Mongolia_North_N	Han_Liaoning	Mbuti.DG	-0.022809	-32.921	7383	9647	99283
Russia_Kalmykia_EBA_Yamnaya.SG	Mongolia_Tuv_LatEMedieval	Han_Liaoning	Mbuti.DG	-0.020606	-32.787	6707	8586	91175
Mongolia_Arkhangai_Xiongnu	Mongolia_EIA_SlabGrave_1	Han_Liaoning	Mbuti.DG	-0.014923	-32.784	7585	9095	101194
Russia_Afanasievo	China_AmurRiver_LPaleolithic	Han_Liaoning	Mbuti.DG	-0.019238	-32.77	6326	7936	83722
Russia_Kalmykia_EBA_Yamnaya.SG	China_WLR_MN	Han_Liaoning	Mbuti.DG	-0.021673	-32.736	7495	9692	101379
Russia_Kalmykia_EBA_Yamnaya.SG	Mongolia_LBA_CenterWest_4	Han_Liaoning	Mbuti.DG	-0.017012	-32.682	7203	8870	97992
Iran_Hasanlu_IA.SG	China_YR_MN	Han_Liaoning	Mbuti.DG	-0.024418	-32.546	6684	8913	91300
Iran_Wezmeh_N.SG	Russia_MN_Boisman	Han_Liaoning	Mbuti.DG	-0.023932	-32.541	7053	9341	95580
Russia_Samara_EBA_Yamnaya	China_AmurRiver_Mesolithic	Han_Liaoning	Mbuti.DG	-0.020303	-32.463	5243	6670	70249
Russia_Afanasievo	China_AmurRiver_EarlyN	Han_Liaoning	Mbuti.DG	-0.02099	-32.354	5583	7159	75084
Russia_Kalmykia_EBA_Yamnaya.SG	China_WLR_LN	Han_Liaoning	Mbuti.DG	-0.023239	-32.352	6263	8245	85283
Hungary_LateC_EBA_Baden_Yamnaya	Russia_DevilsCave_N.SG	Han_Liaoning	Mbuti.DG	-0.023443	-32.346	6173	8118	82986
Iran_Wezmeh_N.SG	Russia_DevilsCave_N.SG	Han_Liaoning	Mbuti.DG	-0.024204	-32.341	7869	10449	106602
Iran_Wezmeh_N.SG	China_WLR_MN	Han_Liaoning	Mbuti.DG	-0.024727	-32.304	7753	10369	105802
Iran_Wezmeh_N.SG	Nepal_Samdzong_1500BP.SG	Han_Liaoning	Mbuti.DG	-0.02245	-32.301	7947	10340	106590
Iran_Hasanlu_IA.SG	Taiwan_Hanben_IA	Han_Liaoning	Mbuti.DG	-0.022763	-32.283	6787	8867	91352
Russia_Alan.SG	Mongolia_East_N	Han_Liaoning	Mbuti.DG	-0.02108	-32.255	6884	8830	92313
Iran_GanjDareh_N	Nepal_Chokhopani_2800BP.SG	Han_Liaoning	Mbuti.DG	-0.023168	-32.253	7380	9678	99168
Russia_Andronovo.SG	China_WLR_LN	Han_Liaoning	Mbuti.DG	-0.022643	-32.223	6444	8426	87496
Luxembourg_Loschbour.DG	Russia_MN_Boisman	Han_Liaoning	Mbuti.DG	-0.020757	-32.208	6743	8619	90358
Russia_Caucasus_EBA_Yamnaya	Taiwan_Hanben_IA	Han_Liaoning	Mbuti.DG	-0.021474	-32.082	5376	6930	72345
Mongolia_EIA_Sagly_4	Mongolia_EIA_SlabGrave_1	Han_Liaoning	Mbuti.DG	-0.011163	-32.074	7673	8811	102017
Russia_Samara_EBA_Yamnaya	Mongolia_East_N	Han_Liaoning	Mbuti.DG	-0.019606	-32.037	6857	8650	91451
Mongolia_Arkhangai_Xiongnu	China_NEastAsia_Coastal_EN	Han_Liaoning	Mbuti.DG	-0.016839	-32.036	7265	8894	96734
Mongolia_Uvs_EIAXiongnuLateMedival	Taiwan_Hanben_IA	Han_Liaoning	Mbuti.DG	-0.013927	-32.029	7883	9325	103500
Russia_Andronovo.SG	Russia_DevilsCave_N.SG	Han_Liaoning	Mbuti.DG	-0.020651	-32.021	7871	10055	105776
Hungary_LateC_EBA_Baden_Yamnaya	China_WLR_MN	Han_Liaoning	Mbuti.DG	-0.023928	-31.976	6110	8085	82560
Luxembourg_Loschbour.DG	Mongolia_EIA_SlabGrave_1	Han_Liaoning	Mbuti.DG	-0.019351	-31.973	7306	9188	97294
Iran_Wezmeh_N.SG	Mongolia_Tuv_LatEMedieval	Han_Liaoning	Mbuti.DG	-0.023538	-31.957	6849	9055	93693
Hungary_LateC_EBA_Baden_Yamnaya	Nepal_Samdzong_1500BP.SG	Han_Liaoning	Mbuti.DG	-0.021804	-31.868	6178	7987	82985
Russia_Caucasus_EBA_Yamnaya	China_YR_LBIA	Han_Liaoning	Mbuti.DG	-0.022923	-31.842	5343	6997	72168
Hungary_LateC_EBA_Baden_Yamnaya	Mongolia_LBA_CenterWest_4	Han_Liaoning	Mbuti.DG	-0.018803	-31.841	6104	7651	82268
Russia_Afanasievo	Mongolia_Bulgan_Xiongnu	Han_Liaoning	Mbuti.DG	-0.018602	-31.783	6903	8634	93047
Russia_Kalmykia_EBA_Yamnaya.SG	Mongolia_East_N	Han_Liaoning	Mbuti.DG	-0.020401	-31.769	6752	8599	90541
Iran_TepeAbdulHosein_N.SG	China_AmurRiver_LPaleolithic	Han_Liaoning	Mbuti.DG	-0.023322	-31.758	5824	7657	78600
Hungary_LateC_EBA_Baden_Yamnaya	China_WLR_LN	Han_Liaoning	Mbuti.DG	-0.025153	-31.679	5289	7095	71794
Luxembourg_Loschbour.DG	China_Shimao_LN	Han_Liaoning	Mbuti.DG	-0.022118	-31.634	7446	9638	99078
Mongolia_Uvs_EIAXiongnuLateMedival	China_Upper_YR_LN	Han_Liaoning	Mbuti.DG	-0.015184	-31.601	7720	9280	102766
Iran_Hasanlu_IA.SG	China_NEastAsia_Coastal_EN	Han_Liaoning	Mbuti.DG	-0.023694	-31.6	6312	8334	85337
Mongolia_Arkhangai_XiongnuEarlyMedieval_2	China_YR_LN	Han_Liaoning	Mbuti.DG	-0.020043	-31.542	6266	7957	84343
Hungary_LateC_EBA_Baden_Yamnaya	Mongolia_LBA_Khovsgol_6	Han_Liaoning	Mbuti.DG	-0.017602	-31.449	6173	7630	82802
Russia_Andronovo.SG	China_WLR_MN	Han_Liaoning	Mbuti.DG	-0.021126	-31.434	7807	10025	105006
Russia_MLBA_Sintashta	Mongolia_Khentii_Xiongnu	Han_Liaoning	Mbuti.DG	-0.02107	-31.397	6481	8321	87326
Mongolia_EIA_Sagly_4	China_YR_MN	Han_Liaoning	Mbuti.DG	-0.014406	-31.39	7820	9310	103438
Mongolia_EIA_Sagly_4	China_Upper_YR_LN	Han_Liaoning	Mbuti.DG	-0.014115	-31.381	7782	9235	102995
Iran_Wezmeh_N.SG	China_AmurRiver_N	Han_Liaoning	Mbuti.DG	-0.024334	-31.347	6130	8148	82899
Iran_TepeAbdulHosein_N.SG	Mongolia_Bulgan_Xiongnu	Han_Liaoning	Mbuti.DG	-0.022188	-31.276	6409	8346	87291
Russia_MLBA_Sintashta	Mongolia_Tuv_Xiongnu	Han_Liaoning	Mbuti.DG	-0.020548	-31.266	7021	8957	94225
Russia_Alan.SG	China_AmurRiver_Mesolithic	Han_Liaoning	Mbuti.DG	-0.02175	-31.253	5251	6782	70412
Mongolia_Arkhangai_Xiongnu	Russia_MN_Boisman	Han_Liaoning	Mbuti.DG	-0.016094	-31.245	7088	8610	94585
Iran_Wezmeh_N.SG	Russia_Buryatia_Xiongnu	Han_Liaoning	Mbuti.DG	-0.022389	-31.11	7387	9636	100457
Russia_Andronovo.SG	Mongolia_North_N	Han_Liaoning	Mbuti.DG	-0.019249	-31.103	7379	9281	98830
Luxembourg_Loschbour.DG	China_Upper_YR_IA	Han_Liaoning	Mbuti.DG	-0.022377	-31.093	7167	9327	96522
Russia_MLBA_Sintashta	China_SEastAsia_Coastal_LN	Han_Liaoning	Mbuti.DG	-0.020585	-31.092	4754	6071	63951
Mongolia_Uvs_EIAXiongnuLateMedival	Mongolia_EIA_SlabGrave_1	Han_Liaoning	Mbuti.DG	-0.012368	-31.053	7628	8886	101677
Russia_Andronovo.SG	China_AmurRiver_N	Han_Liaoning	Mbuti.DG	-0.020251	-31.05	6193	7866	82622
Russia_Samara_EBA_Yamnaya	China_AmurRiver_EarlyN	Han_Liaoning	Mbuti.DG	-0.021001	-31.016	5537	7100	74470
Iran_Hasanlu_IA.SG	China_Upper_YR_LN	Han_Liaoning	Mbuti.DG	-0.023789	-31.007	6732	8896	90955
Russia_Andronovo.SG	Russia_Buryatia_Xiongnu	Han_Liaoning	Mbuti.DG	-0.018872	-31.007	7413	9300	99938
Russia_Alan.SG	China_AmurRiver_LPaleolithic	Han_Liaoning	Mbuti.DG	-0.020491	-30.965	6313	8021	83368
Russia_Andronovo.SG	Mongolia_Tuv_LatEMedieval	Han_Liaoning	Mbuti.DG	-0.019785	-30.948	6912	8758	93279
Hungary_LateC_EBA_Baden_Yamnaya	China_AmurRiver_Mesolithic	Han_Liaoning	Mbuti.DG	-0.022423	-30.94	4804	6248	64410
Russia_Afanasievo	Mongolia_Khentii_Xiongnu	Han_Liaoning	Mbuti.DG	-0.020425	-30.916	6464	8246	87253
Mongolia_Arkhangai_Xiongnu	China_Upper_YR_IA	Han_Liaoning	Mbuti.DG	-0.017685	-30.885	7457	9216	99488
Iran_TepeAbdulHosein_N.SG	Mongolia_Tuv_Xiongnu	Han_Liaoning	Mbuti.DG	-0.023499	-30.865	6455	8527	88158
Russia_Caucasus_EBA_Yamnaya	China_Upper_YR_LN	Han_Liaoning	Mbuti.DG	-0.022239	-30.86	5324	6919	71750
Iran_Hasanlu_IA.SG	China_Upper_YR_IA	Han_Liaoning	Mbuti.DG	-0.024125	-30.841	6526	8661	88494
Russia_MLBA_Sintashta	China_WLR_BA	Han_Liaoning	Mbuti.DG	-0.022804	-30.818	4200	5504	57164
Luxembourg_Loschbour.DG	China_WLR_MN	Han_Liaoning	Mbuti.DG	-0.021548	-30.76	7374	9518	99526
Russia_Andronovo.SG	Nepal_Samdzong_1500BP.SG	Han_Liaoning	Mbuti.DG	-0.018814	-30.743	7924	9914	105771
Russia_Kalmykia_EBA_Yamnaya.SG	China_AmurRiver_Mesolithic	Han_Liaoning	Mbuti.DG	-0.02116	-30.741	5211	6687	69791
Hungary_LateC_EBA_Baden_Yamnaya	Mongolia_East_N	Han_Liaoning	Mbuti.DG	-0.022307	-30.733	5853	7610	78767
Russia_MLBA_Sintashta	Mongolia_EBA_Ulgii_1	Han_Liaoning	Mbuti.DG	-0.016086	-30.732	7068	8599	95175
Russia_Alan.SG	China_AmurRiver_EarlyN	Han_Liaoning	Mbuti.DG	-0.022453	-30.713	5535	7212	74694
Iran_TepeAbdulHosein_N.SG	China_AmurRiver_EarlyN	Han_Liaoning	Mbuti.DG	-0.024654	-30.712	5211	6954	70690
Russia_Samara_EBA_Yamnaya	China_AmurRiver_LPaleolithic	Han_Liaoning	Mbuti.DG	-0.019243	-30.71	6312	7909	82987
Russia_MLBA_Sintashta	Mongolia_EIA_Sagly_4	Han_Liaoning	Mbuti.DG	-0.008625	-30.65	7624	8516	103337
Iran_TepeAbdulHosein_N.SG	China_AmurRiver_Mesolithic	Han_Liaoning	Mbuti.DG	-0.023969	-30.63	4914	6514	66733
Ukraine_EBA_Yamnaya	China_YR_LN	Han_Liaoning	Mbuti.DG	-0.023154	-30.627	5708	7493	77087
Russia_Caucasus_EBA_Yamnaya	Mongolia_EIA_SlabGrave_1	Han_Liaoning	Mbuti.DG	-0.01976	-30.623	5356	6783	72210
Mongolia_Arkhangai_XiongnuEarlyMedieval_2	China_YR_LBIA	Han_Liaoning	Mbuti.DG	-0.02025	-30.571	6227	7929	84045
Russia_Afanasievo	China_SEastAsia_Coastal_LN	Han_Liaoning	Mbuti.DG	-0.01987	-30.549	4753	6023	63917
Mongolia_Uvs_EIAXiongnuLateMedival	China_NEastAsia_Coastal_EN	Han_Liaoning	Mbuti.DG	-0.014658	-30.435	7301	8724	97091
Russia_Caucasus_EBA_Yamnaya	China_NEastAsia_Coastal_EN	Han_Liaoning	Mbuti.DG	-0.021746	-30.427	5302	6852	71287
Mongolia_Uvs_EIAXiongnuLateMedival	China_YR_MN	Han_Liaoning	Mbuti.DG	-0.015528	-30.402	7767	9369	103195
Luxembourg_Loschbour.DG	Russia_DevilsCave_N.SG	Han_Liaoning	Mbuti.DG	-0.020973	-30.399	7487	9589	100233
Russia_Alan.SG	Mongolia_Bulgan_Xiongnu	Han_Liaoning	Mbuti.DG	-0.019511	-30.355	6898	8711	92941
Iran_Wezmeh_N.SG	Mongolia_East_N	Han_Liaoning	Mbuti.DG	-0.02327	-30.28	6869	9031	92909
Russia_Afanasievo	Mongolia_Tuv_Xiongnu	Han_Liaoning	Mbuti.DG	-0.020037	-30.214	7018	8902	94015
Russia_Kalmykia_EBA_Yamnaya.SG	China_AmurRiver_EarlyN	Han_Liaoning	Mbuti.DG	-0.022001	-30.21	5517	7145	73984
Russia_Andronovo.SG	Mongolia_LBA_CenterWest_4	Han_Liaoning	Mbuti.DG	-0.016343	-30.206	7451	9096	100672
Russia_MLBA_Sintashta	Nepal_Chokhopani_2800BP.SG	Han_Liaoning	Mbuti.DG	-0.019709	-30.198	7903	9972	104991
Russia_Caucasus_EBA_Yamnaya	China_YR_MN	Han_Liaoning	Mbuti.DG	-0.022876	-30.177	5362	7012	72122
Mongolia_Arkhangai_Xiongnu	China_Shimao_LN	Han_Liaoning	Mbuti.DG	-0.017639	-30.158	7651	9451	102033
Iran_Hasanlu_IA.SG	Mongolia_EIA_SlabGrave_1	Han_Liaoning	Mbuti.DG	-0.021177	-30.138	6689	8582	89353
Ukraine_EBA_Yamnaya	China_YR_LBIA	Han_Liaoning	Mbuti.DG	-0.023215	-30.137	5673	7457	76851
Luxembourg_Loschbour.DG	China_WLR_LN	Han_Liaoning	Mbuti.DG	-0.022479	-30.089	6148	8013	83000
Russia_Samara_EBA_Yamnaya	Mongolia_Bulgan_Xiongnu	Han_Liaoning	Mbuti.DG	-0.018478	-30.069	6806	8498	91588
Iran_Wezmeh_N.SG	Mongolia_LBA_CenterWest_4	Han_Liaoning	Mbuti.DG	-0.019996	-30.055	7495	9519	101186
Iran_Wezmeh_N.SG	Mongolia_LBA_Khovsgol_6	Han_Liaoning	Mbuti.DG	-0.018624	-29.992	7763	9709	104480
Mongolia_EIA_Sagly_4	China_NEastAsia_Coastal_EN	Han_Liaoning	Mbuti.DG	-0.013366	-29.962	7325	8626	97335
Iran_Hasanlu_IA.SG	China_Shimao_LN	Han_Liaoning	Mbuti.DG	-0.024012	-29.936	6724	8904	90799
Iran_TepeAbdulHosein_N.SG	Mongolia_Khentii_Xiongnu	Han_Liaoning	Mbuti.DG	-0.023651	-29.93	6004	7939	81810
Russia_Kalmykia_EBA_Yamnaya.SG	China_AmurRiver_LPaleolithic	Han_Liaoning	Mbuti.DG	-0.020125	-29.906	6183	7834	82072
Iran_TepeAbdulHosein_N.SG	Nepal_Chokhopani_2800BP.SG	Han_Liaoning	Mbuti.DG	-0.022846	-29.856	7232	9477	98239
Ukraine_EBA_Yamnaya	Taiwan_Hanben_IA	Han_Liaoning	Mbuti.DG	-0.021825	-29.852	5709	7391	77066
Russia_Afanasievo	Mongolia_EBA_Ulgii_1	Han_Liaoning	Mbuti.DG	-0.015538	-29.839	7029	8506	95020
Mongolia_Uvs_EIAXiongnuLateMedival	Russia_MN_Boisman	Han_Liaoning	Mbuti.DG	-0.013713	-29.798	7124	8425	94875
Iran_GanjDareh_N	China_WLR_BA	Han_Liaoning	Mbuti.DG	-0.025178	-29.796	4057	5444	55098
Mongolia_Arkhangai_XiongnuEarlyMedieval_2	Taiwan_Hanben_IA	Han_Liaoning	Mbuti.DG	-0.01857	-29.794	6312	7877	84289
Luxembourg_Loschbour.DG	Mongolia_North_N	Han_Liaoning	Mbuti.DG	-0.019243	-29.773	7041	8845	93737
Mongolia_Arkhangai_Xiongnu	Mongolia_North_N	Han_Liaoning	Mbuti.DG	-0.014745	-29.757	7357	8802	97990
Luxembourg_Loschbour.DG	Russia_Buryatia_Xiongnu	Han_Liaoning	Mbuti.DG	-0.019014	-29.729	7047	8849	94777
Iran_Hasanlu_IA.SG	Russia_MN_Boisman	Han_Liaoning	Mbuti.DG	-0.022709	-29.725	6189	8082	83356
Iran_GanjDareh_N	Nepal_Mebrak_2125BP.SG	Han_Liaoning	Mbuti.DG	-0.024783	-29.669	4871	6515	66334
Ukraine_EBA_Yamnaya	China_YR_MN	Han_Liaoning	Mbuti.DG	-0.023352	-29.634	5656	7450	76819
Iran_TepeAbdulHosein_N.SG	Mongolia_EBA_Ulgii_1	Han_Liaoning	Mbuti.DG	-0.019352	-29.593	6542	8264	89013
Mongolia_EIA_Sagly_4	Russia_MN_Boisman	Han_Liaoning	Mbuti.DG	-0.012382	-29.574	7160	8338	95149
Russia_Caucasus_EBA_Yamnaya	Russia_MN_Boisman	Han_Liaoning	Mbuti.DG	-0.020689	-29.462	5265	6732	70902
Iran_GanjDareh_N	Taiwan_Gongguan	Han_Liaoning	Mbuti.DG	-0.025132	-29.459	4844	6503	66002
Russia_Caucasus_EBA_Yamnaya	China_Shimao_LN	Han_Liaoning	Mbuti.DG	-0.022699	-29.449	5347	6977	71821
Luxembourg_Loschbour.DG	China_AmurRiver_N	Han_Liaoning	Mbuti.DG	-0.020645	-29.401	5908	7535	78791
Iran_GanjDareh_N	China_NEastAsia_Inland_EN	Han_Liaoning	Mbuti.DG	-0.023369	-29.321	5913	7785	80100
Russia_Andronovo.SG	Mongolia_LBA_Khovsgol_6	Han_Liaoning	Mbuti.DG	-0.015005	-29.248	7713	9271	103808
Mongolia_Arkhangai_Xiongnu	Russia_Buryatia_Xiongnu	Han_Liaoning	Mbuti.DG	-0.014587	-29.223	7357	8796	98657
Iran_Hasanlu_IA.SG	China_WLR_LN	Han_Liaoning	Mbuti.DG	-0.024687	-29.2	5604	7498	76753
Russia_Samara_EBA_Yamnaya	Mongolia_Khentii_Xiongnu	Han_Liaoning	Mbuti.DG	-0.0204	-29.184	6399	8158	86253
Iran_TepeAbdulHosein_N.SG	China_SEastAsia_Coastal_LN	Han_Liaoning	Mbuti.DG	-0.02383	-29.178	4421	5864	60536
Mongolia_Arkhangai_XiongnuEarlyMedieval_2	China_Upper_YR_LN	Han_Liaoning	Mbuti.DG	-0.019734	-29.125	6230	7879	83599
Russia_Alan.SG	Mongolia_Tuv_Xiongnu	Han_Liaoning	Mbuti.DG	-0.021012	-29.109	6957	8933	94046
Iran_TepeAbdulHosein_N.SG	China_WLR_BA	Han_Liaoning	Mbuti.DG	-0.025726	-29.087	3873	5259	53863
Hungary_LateC_EBA_Baden_Yamnaya	China_AmurRiver_EarlyN	Han_Liaoning	Mbuti.DG	-0.023292	-29.087	4978	6552	67607
Iran_Hasanlu_IA.SG	China_AmurRiver_N	Han_Liaoning	Mbuti.DG	-0.022784	-29.075	5450	7112	72939
Iran_Hasanlu_IA.SG	Mongolia_North_N	Han_Liaoning	Mbuti.DG	-0.021188	-29.055	6466	8294	86275
Mongolia_Arkhangai_Xiongnu	Russia_DevilsCave_N.SG	Han_Liaoning	Mbuti.DG	-0.016491	-29.053	7752	9454	103174
Hungary_LateC_EBA_Baden_Yamnaya	China_AmurRiver_LPaleolithic	Han_Liaoning	Mbuti.DG	-0.021765	-29.019	5483	7077	73225
Iran_Wezmeh_N.SG	Mongolia_Tuv_Xiongnu	Han_Liaoning	Mbuti.DG	-0.023458	-28.997	7012	9233	94645
Iran_GanjDareh_N	Mongolia_EIA_Xiongnu_7	Han_Liaoning	Mbuti.DG	-0.022477	-28.976	5569	7288	76438
Russia_Andronovo.SG	Mongolia_East_N	Han_Liaoning	Mbuti.DG	-0.019746	-28.941	6892	8719	92524
Ukraine_EBA_Yamnaya	China_Upper_YR_LN	Han_Liaoning	Mbuti.DG	-0.022863	-28.924	5680	7427	76416
Russia_Caucasus_EBA_Yamnaya	China_Upper_YR_IA	Han_Liaoning	Mbuti.DG	-0.022787	-28.898	5204	6810	70473
Russia_Alan.SG	Mongolia_Khentii_Xiongnu	Han_Liaoning	Mbuti.DG	-0.021649	-28.86	6442	8323	86895
Iran_Hasanlu_IA.SG	China_WLR_MN	Han_Liaoning	Mbuti.DG	-0.023281	-28.85	6792	8916	91228
Russia_Alan.SG	China_WLR_BA	Han_Liaoning	Mbuti.DG	-0.023593	-28.845	4177	5526	57172
Russia_Alan.SG	Mongolia_EBA_Ulgii_1	Han_Liaoning	Mbuti.DG	-0.016656	-28.838	7044	8621	94697
Ukraine_EBA_Yamnaya	China_Shimao_LN	Han_Liaoning	Mbuti.DG	-0.023129	-28.815	5666	7434	76452
Russia_Alan.SG	Nepal_Chokhopani_2800BP.SG	Han_Liaoning	Mbuti.DG	-0.020228	-28.812	7945	10085	105761
Russia_Kalmykia_EBA_Yamnaya.SG	Mongolia_Bulgan_Xiongnu	Han_Liaoning	Mbuti.DG	-0.019042	-28.804	6741	8472	90938
Russia_MLBA_Sintashta	Taiwan_Gongguan	Han_Liaoning	Mbuti.DG	-0.022232	-28.799	4935	6414	66565
Mongolia_Arkhangai_XiongnuEarlyMedieval_2	China_YR_MN	Han_Liaoning	Mbuti.DG	-0.019921	-28.783	6231	7905	84009
Iran_GanjDareh_N	Mongolia_EIA_Sagly_4	Han_Liaoning	Mbuti.DG	-0.011876	-28.769	7330	8500	98551
Russia_Caucasus_EBA_Yamnaya	China_AmurRiver_N	Han_Liaoning	Mbuti.DG	-0.020851	-28.753	4871	6240	65655
Mongolia_Arkhangai_Xiongnu	China_WLR_MN	Han_Liaoning	Mbuti.DG	-0.017016	-28.695	7688	9431	102476
Russia_Afanasievo	Nepal_Chokhopani_2800BP.SG	Han_Liaoning	Mbuti.DG	-0.019177	-28.676	7908	9912	104508
Iran_Wezmeh_N.SG	China_AmurRiver_LPaleolithic	Han_Liaoning	Mbuti.DG	-0.022991	-28.612	6305	8234	83897
Russia_Afanasievo	China_WLR_BA	Han_Liaoning	Mbuti.DG	-0.021632	-28.596	4209	5443	57024
Mongolia_Arkhangai_Xiongnu	China_WLR_LN	Han_Liaoning	Mbuti.DG	-0.018233	-28.558	6436	8005	86082
Ukraine_EBA_Yamnaya	Mongolia_EIA_SlabGrave_1	Han_Liaoning	Mbuti.DG	-0.020122	-28.521	5682	7230	76893
Mongolia_Arkhangai_Xiongnu	Mongolia_Tuv_LatEMedieval	Han_Liaoning	Mbuti.DG	-0.015493	-28.497	6918	8352	92607
Russia_Caucasus_EBA_Yamnaya	Mongolia_Tuv_LatEMedieval	Han_Liaoning	Mbuti.DG	-0.020587	-28.484	5138	6574	69765
Russia_Alan.SG	China_SEastAsia_Coastal_LN	Han_Liaoning	Mbuti.DG	-0.020957	-28.479	4742	6075	63599
Russia_Samara_EBA_Yamnaya	Mongolia_Tuv_Xiongnu	Han_Liaoning	Mbuti.DG	-0.019647	-28.469	6921	8740	92560
Iran_Hasanlu_IA.SG	Russia_DevilsCave_N.SG	Han_Liaoning	Mbuti.DG	-0.022673	-28.416	6842	8924	91830
Russia_Samara_EBA_Yamnaya	China_SEastAsia_Coastal_LN	Han_Liaoning	Mbuti.DG	-0.019881	-28.412	4749	6013	63551
Ukraine_EBA_Yamnaya	China_NEastAsia_Coastal_EN	Han_Liaoning	Mbuti.DG	-0.022372	-28.373	5607	7302	75770
Iran_Wezmeh_N.SG	China_AmurRiver_Mesolithic	Han_Liaoning	Mbuti.DG	-0.023997	-28.347	5254	6955	70881
Luxembourg_Loschbour.DG	Mongolia_LBA_CenterWest_4	Han_Liaoning	Mbuti.DG	-0.016545	-28.338	7129	8708	95470
Hungary_LateC_EBA_Baden_Yamnaya	Mongolia_Tuv_Xiongnu	Han_Liaoning	Mbuti.DG	-0.022531	-28.315	5822	7583	78188
Russia_Kalmykia_EBA_Yamnaya.SG	Mongolia_Tuv_Xiongnu	Han_Liaoning	Mbuti.DG	-0.020504	-28.287	6809	8691	91771
Mongolia_Arkhangai_Xiongnu	China_AmurRiver_N	Han_Liaoning	Mbuti.DG	-0.015787	-28.281	6199	7498	82278
Russia_Caucasus_EBA_Yamnaya	Mongolia_North_N	Han_Liaoning	Mbuti.DG	-0.019403	-28.278	5344	6736	71723
Luxembourg_Loschbour.DG	Mongolia_Tuv_LatEMedieval	Han_Liaoning	Mbuti.DG	-0.020118	-28.247	6603	8384	88554
Iran_Wezmeh_N.SG	China_AmurRiver_EarlyN	Han_Liaoning	Mbuti.DG	-0.024829	-28.204	5532	7399	75180
Mongolia_Arkhangai_XiongnuEarlyMedieval_2	Mongolia_EIA_SlabGrave_1	Han_Liaoning	Mbuti.DG	-0.0169	-28.171	6236	7652	83770
Iran_Hasanlu_IA.SG	Nepal_Samdzong_1500BP.SG	Han_Liaoning	Mbuti.DG	-0.020865	-28.157	6868	8784	91825
Russia_MLBA_Sintashta	Nepal_Mebrak_2125BP.SG	Han_Liaoning	Mbuti.DG	-0.021365	-28.155	5205	6691	69553
Luxembourg_Loschbour.DG	Nepal_Samdzong_1500BP.SG	Han_Liaoning	Mbuti.DG	-0.01906	-28.126	7563	9474	100221
Russia_Caucasus_EBA_Yamnaya	Russia_DevilsCave_N.SG	Han_Liaoning	Mbuti.DG	-0.021362	-28.124	5405	6951	72343
Russia_Kalmykia_EBA_Yamnaya.SG	Mongolia_Khentii_Xiongnu	Han_Liaoning	Mbuti.DG	-0.02097	-28.103	6325	8116	85451
Mongolia_Uvs_EIAXiongnuLateMedival	China_Upper_YR_IA	Han_Liaoning	Mbuti.DG	-0.015166	-28.1	7532	9049	100002
Mongolia_Arkhangai_XiongnuEarlyMedieval_2	China_NEastAsia_Coastal_EN	Han_Liaoning	Mbuti.DG	-0.019286	-28.001	6074	7652	81817
Russia_Samara_EBA_Yamnaya	Mongolia_EBA_Ulgii_1	Han_Liaoning	Mbuti.DG	-0.015457	-27.963	6955	8404	93745
Russia_Caucasus_EBA_Yamnaya	Russia_Buryatia_Xiongnu	Han_Liaoning	Mbuti.DG	-0.019147	-27.959	5289	6661	71639
Iran_Hasanlu_IA.SG	Russia_Buryatia_Xiongnu	Han_Liaoning	Mbuti.DG	-0.02089	-27.946	6497	8319	87217
Iran_Wezmeh_N.SG	Mongolia_Khentii_Xiongnu	Han_Liaoning	Mbuti.DG	-0.024011	-27.945	6428	8528	87459
Russia_MLBA_Sintashta	Mongolia_EIA_Xiongnu_7	Han_Liaoning	Mbuti.DG	-0.019235	-27.9	5716	7204	77383
Mongolia_Uvs_EIAXiongnuLateMedival	China_Shimao_LN	Han_Liaoning	Mbuti.DG	-0.015232	-27.843	7727	9289	102593
Ukraine_EBA_Yamnaya	Russia_MN_Boisman	Han_Liaoning	Mbuti.DG	-0.021398	-27.842	5588	7203	75497
Iran_TepeAbdulHosein_N.SG	Nepal_Mebrak_2125BP.SG	Han_Liaoning	Mbuti.DG	-0.024742	-27.828	4787	6404	65344
Iran_Wezmeh_N.SG	Mongolia_Bulgan_Xiongnu	Han_Liaoning	Mbuti.DG	-0.022006	-27.816	6890	8948	93525
Iran_TepeAbdulHosein_N.SG	Taiwan_Gongguan	Han_Liaoning	Mbuti.DG	-0.025399	-27.809	4597	6197	63018
Mongolia_LBA_MongunTaiga_3	China_YR_LN	Han_Liaoning	Mbuti.DG	-0.014145	-27.797	7158	8495	94553
Russia_Andronovo.SG	China_AmurRiver_Mesolithic	Han_Liaoning	Mbuti.DG	-0.020153	-27.777	5320	6744	70700
Hungary_LateC_EBA_Baden_Yamnaya	Mongolia_Khentii_Xiongnu	Han_Liaoning	Mbuti.DG	-0.023085	-27.759	5582	7326	75540
Mongolia_Arkhangai_XiongnuEarlyMedieval_2	Russia_MN_Boisman	Han_Liaoning	Mbuti.DG	-0.018212	-27.699	6046	7519	80912
Hungary_LateC_EBA_Baden_Yamnaya	Mongolia_Bulgan_Xiongnu	Han_Liaoning	Mbuti.DG	-0.020708	-27.695	5805	7419	77955
Russia_Andronovo.SG	China_AmurRiver_LPaleolithic	Han_Liaoning	Mbuti.DG	-0.019188	-27.668	6326	7930	83597
Russia_MLBA_Sintashta	China_NEastAsia_Inland_EN	Han_Liaoning	Mbuti.DG	-0.020105	-27.631	6065	7701	81419
Mongolia_Uvs_EIAXiongnuLateMedival	China_AmurRiver_N	Han_Liaoning	Mbuti.DG	-0.013653	-27.627	6207	7333	82487
Russia_Samara_EBA_Yamnaya	China_WLR_BA	Han_Liaoning	Mbuti.DG	-0.02213	-27.596	4117	5358	56081
Russia_Andronovo.SG	China_AmurRiver_EarlyN	Han_Liaoning	Mbuti.DG	-0.020783	-27.592	5604	7163	75000
Russia_Andronovo.SG	Mongolia_Bulgan_Xiongnu	Han_Liaoning	Mbuti.DG	-0.018168	-27.579	6907	8599	93123
Iran_Wezmeh_N.SG	Nepal_Chokhopani_2800BP.SG	Han_Liaoning	Mbuti.DG	-0.022602	-27.558	7993	10398	106419
Mongolia_Arkhangai_Xiongnu	Nepal_Samdzong_1500BP.SG	Han_Liaoning	Mbuti.DG	-0.014641	-27.543	7855	9366	103173
Russia_Alan.SG	Nepal_Mebrak_2125BP.SG	Han_Liaoning	Mbuti.DG	-0.021969	-27.532	5182	6717	69865
Iran_TepeAbdulHosein_N.SG	China_NEastAsia_Inland_EN	Han_Liaoning	Mbuti.DG	-0.023281	-27.532	5653	7437	76633
Mongolia_EIA_Sagly_4	China_Shimao_LN	Han_Liaoning	Mbuti.DG	-0.01404	-27.504	7777	9221	102829
Luxembourg_Loschbour.DG	Mongolia_LBA_Khovsgol_6	Han_Liaoning	Mbuti.DG	-0.01536	-27.495	7376	8887	98390
Luxembourg_Loschbour.DG	Mongolia_East_N	Han_Liaoning	Mbuti.DG	-0.019898	-27.457	6597	8346	87895
Mongolia_Arkhangai_Xiongnu	Mongolia_LBA_CenterWest_4	Han_Liaoning	Mbuti.DG	-0.012077	-27.394	7490	8692	99534
Hungary_LateC_EBA_Baden_Yamnaya	China_SEastAsia_Coastal_LN	Han_Liaoning	Mbuti.DG	-0.022443	-27.37	4251	5553	57981
Hungary_LateC_EBA_Baden_Yamnaya	Mongolia_EBA_Ulgii_1	Han_Liaoning	Mbuti.DG	-0.018243	-27.356	5941	7405	80223
Mongolia_EIA_Sagly_4	China_Upper_YR_IA	Han_Liaoning	Mbuti.DG	-0.013955	-27.323	7588	8987	100232
Russia_Kalmykia_EBA_Yamnaya.SG	China_SEastAsia_Coastal_LN	Han_Liaoning	Mbuti.DG	-0.020627	-27.315	4693	5992	62964
Iran_Hasanlu_IA.SG	Mongolia_Tuv_LatEMedieval	Han_Liaoning	Mbuti.DG	-0.021774	-27.294	6065	7844	81713
Russia_Kalmykia_EBA_Yamnaya.SG	Nepal_Chokhopani_2800BP.SG	Han_Liaoning	Mbuti.DG	-0.019846	-27.271	7643	9665	101878
Mongolia_Arkhangai_XiongnuEarlyMedieval_2	China_Upper_YR_IA	Han_Liaoning	Mbuti.DG	-0.020017	-27.243	6091	7729	81846
Russia_Kalmykia_EBA_Yamnaya.SG	China_WLR_BA	Han_Liaoning	Mbuti.DG	-0.022768	-27.225	4072	5346	55944
Mongolia_Arkhangai_XiongnuEarlyMedieval_2	China_Shimao_LN	Han_Liaoning	Mbuti.DG	-0.019741	-27.201	6206	7856	83588
Russia_Caucasus_EBA_Yamnaya	China_WLR_MN	Han_Liaoning	Mbuti.DG	-0.021783	-27.193	5354	6924	72041
Russia_Caucasus_EBA_Yamnaya	China_WLR_LN	Han_Liaoning	Mbuti.DG	-0.022838	-27.191	4705	6159	63668
Iran_Hasanlu_IA.SG	Mongolia_East_N	Han_Liaoning	Mbuti.DG	-0.022411	-27.185	6038	7856	81127
Russia_Afanasievo	Taiwan_Gongguan	Han_Liaoning	Mbuti.DG	-0.021409	-27.164	4951	6375	66540
Hungary_LateC_EBA_Baden_Yamnaya	Nepal_Chokhopani_2800BP.SG	Han_Liaoning	Mbuti.DG	-0.022299	-27.14	6183	8030	82813
Russia_Afanasievo	Mongolia_EIA_Xiongnu_7	Han_Liaoning	Mbuti.DG	-0.018502	-27.11	5719	7150	77366
Russia_Alan.SG	Taiwan_Gongguan	Han_Liaoning	Mbuti.DG	-0.022835	-27.086	4910	6421	66160
Mongolia_LBA_CenterWest_5	China_YR_LN	Han_Liaoning	Mbuti.DG	-0.015877	-27.044	7467	9037	98910
Iran_Wezmeh_N.SG	China_SEastAsia_Coastal_LN	Han_Liaoning	Mbuti.DG	-0.023442	-26.97	4718	6218	64010
Iran_Hasanlu_IA.SG	Mongolia_LBA_CenterWest_4	Han_Liaoning	Mbuti.DG	-0.018659	-26.916	6537	8175	87778
Ukraine_EBA_Yamnaya	China_Upper_YR_IA	Han_Liaoning	Mbuti.DG	-0.022977	-26.885	5530	7253	75010
Mongolia_EIA_Sagly_4	China_AmurRiver_N	Han_Liaoning	Mbuti.DG	-0.012428	-26.864	6228	7255	82608
Mongolia_Arkhangai_Xiongnu	Mongolia_East_N	Han_Liaoning	Mbuti.DG	-0.015406	-26.806	6917	8333	91933
Russia_Caucasus_EBA_Yamnaya	Nepal_Samdzong_1500BP.SG	Han_Liaoning	Mbuti.DG	-0.019611	-26.783	5424	6843	72344
Russia_Afanasievo	China_NEastAsia_Inland_EN	Han_Liaoning	Mbuti.DG	-0.019525	-26.774	6073	7662	81360
Russia_Kalmykia_EBA_Yamnaya.SG	Mongolia_EBA_Ulgii_1	Han_Liaoning	Mbuti.DG	-0.016068	-26.753	6845	8337	92865
Russia_Samara_EBA_Yamnaya	Nepal_Chokhopani_2800BP.SG	Han_Liaoning	Mbuti.DG	-0.019012	-26.729	7723	9664	102090
Russia_Afanasievo	Mongolia_EIA_Sagly_4	Han_Liaoning	Mbuti.DG	-0.008055	-26.687	7626	8456	103032
Ukraine_EBA_Yamnaya	China_AmurRiver_N	Han_Liaoning	Mbuti.DG	-0.021551	-26.68	5128	6623	69387
Mongolia_LBA_MongunTaiga_3	China_YR_LBIA	Han_Liaoning	Mbuti.DG	-0.01428	-26.653	7098	8443	94182
Mongolia_Uvs_EIAXiongnuLateMedival	China_WLR_LN	Han_Liaoning	Mbuti.DG	-0.015836	-26.618	6466	7836	86471
Mongolia_Arkhangai_XiongnuEarlyMedieval_2	China_WLR_MN	Han_Liaoning	Mbuti.DG	-0.019375	-26.6	6227	7853	83895
Ukraine_EBA_Yamnaya	Russia_DevilsCave_N.SG	Han_Liaoning	Mbuti.DG	-0.021876	-26.496	5719	7405	77072
Russia_Andronovo.SG	Mongolia_Khentii_Xiongnu	Han_Liaoning	Mbuti.DG	-0.020173	-26.485	6482	8240	87141
Mongolia_Uvs_EIAXiongnuLateMedival	Russia_DevilsCave_N.SG	Han_Liaoning	Mbuti.DG	-0.01402	-26.467	7819	9274	103769
Russia_Afanasievo	Nepal_Mebrak_2125BP.SG	Han_Liaoning	Mbuti.DG	-0.020783	-26.446	5195	6636	69337
Hungary_LateC_EBA_Baden_Yamnaya	China_NEastAsia_Inland_EN	Han_Liaoning	Mbuti.DG	-0.022099	-26.436	5353	6948	72148
Mongolia_EIA_Sagly_4	Russia_Buryatia_Xiongnu	Han_Liaoning	Mbuti.DG	-0.010832	-26.413	7493	8570	99368
Mongolia_EIA_Sagly_4	China_WLR_LN	Han_Liaoning	Mbuti.DG	-0.014723	-26.4	6524	7800	86699
Russia_Caucasus_EBA_Yamnaya	Mongolia_LBA_CenterWest_4	Han_Liaoning	Mbuti.DG	-0.016722	-26.386	5316	6519	71957
Mongolia_EIA_Sagly_4	Mongolia_North_N	Han_Liaoning	Mbuti.DG	-0.011019	-26.375	7425	8512	98685
Mongolia_Arkhangai_XiongnuEarlyMedieval_2	China_AmurRiver_N	Han_Liaoning	Mbuti.DG	-0.018201	-26.353	5424	6753	73024
Russia_Samara_EBA_Yamnaya	Taiwan_Gongguan	Han_Liaoning	Mbuti.DG	-0.02132	-26.322	4957	6367	66116
Mongolia_LBA_CenterWest_5	China_YR_LBIA	Han_Liaoning	Mbuti.DG	-0.016066	-26.32	7384	8965	98432
Russia_Andronovo.SG	Mongolia_Tuv_Xiongnu	Han_Liaoning	Mbuti.DG	-0.01969	-26.313	7009	8863	94164
Mongolia_LBA_MongunTaiga_3	Taiwan_Hanben_IA	Han_Liaoning	Mbuti.DG	-0.012652	-26.296	7202	8398	94498
Ukraine_EBA_Yamnaya	Mongolia_Tuv_LatEMedieval	Han_Liaoning	Mbuti.DG	-0.020865	-26.295	5420	6962	73893
Mongolia_Uvs_EIAXiongnuLateMedival	Mongolia_North_N	Han_Liaoning	Mbuti.DG	-0.012427	-26.293	7378	8601	98373
Ukraine_EBA_Yamnaya	China_WLR_MN	Han_Liaoning	Mbuti.DG	-0.022228	-26.252	5677	7383	76740
Russia_Alan.SG	Mongolia_EIA_Xiongnu_7	Han_Liaoning	Mbuti.DG	-0.019781	-26.239	5728	7249	76928
Hungary_LateC_EBA_Baden_Yamnaya	Taiwan_Gongguan	Han_Liaoning	Mbuti.DG	-0.023935	-26.226	4554	6017	61137
Luxembourg_Loschbour.DG	China_AmurRiver_Mesolithic	Han_Liaoning	Mbuti.DG	-0.020159	-26.217	5097	6462	67690
Russia_Alan.SG	China_NEastAsia_Inland_EN	Han_Liaoning	Mbuti.DG	-0.020596	-26.192	6033	7701	80977
Luxembourg_Loschbour.DG	China_AmurRiver_EarlyN	Han_Liaoning	Mbuti.DG	-0.02079	-26.176	5349	6839	71673
Ukraine_EBA_Yamnaya	Russia_Buryatia_Xiongnu	Han_Liaoning	Mbuti.DG	-0.019597	-26.11	5598	7090	76139
Mongolia_Arkhangai_XiongnuEarlyMedieval_2	Mongolia_North_N	Han_Liaoning	Mbuti.DG	-0.017003	-26.109	6157	7561	82587
Russia_Caucasus_EBA_Yamnaya	Mongolia_East_N	Han_Liaoning	Mbuti.DG	-0.020454	-26.104	5146	6570	69657
Mongolia_Arkhangai_Xiongnu	Mongolia_LBA_Khovsgol_6	Han_Liaoning	Mbuti.DG	-0.010751	-26.086	7702	8798	101994
Russia_Caucasus_EBA_Yamnaya	China_AmurRiver_Mesolithic	Han_Liaoning	Mbuti.DG	-0.020403	-26.082	4393	5598	59054
Mongolia_Uvs_EIAXiongnuLateMedival	China_WLR_MN	Han_Liaoning	Mbuti.DG	-0.014444	-26.069	7750	9238	103072
Ukraine_EBA_Yamnaya	Mongolia_North_N	Han_Liaoning	Mbuti.DG	-0.019946	-26.039	5652	7176	76360
Russia_Caucasus_EBA_Yamnaya	China_AmurRiver_EarlyN	Han_Liaoning	Mbuti.DG	-0.021176	-26.004	4557	5861	61576
Iran_Hasanlu_IA.SG	Mongolia_Tuv_Xiongnu	Han_Liaoning	Mbuti.DG	-0.022082	-25.922	6126	7943	82286
Russia_Caucasus_EBA_Yamnaya	Mongolia_LBA_Khovsgol_6	Han_Liaoning	Mbuti.DG	-0.015795	-25.911	5346	6488	72268
Iran_Wezmeh_N.SG	China_WLR_BA	Han_Liaoning	Mbuti.DG	-0.025675	-25.904	4189	5666	57514
Iran_Wezmeh_N.SG	Mongolia_EBA_Ulgii_1	Han_Liaoning	Mbuti.DG	-0.019209	-25.895	7107	8938	95317
Iran_Wezmeh_N.SG	Nepal_Mebrak_2125BP.SG	Han_Liaoning	Mbuti.DG	-0.024423	-25.877	5168	6884	70277
Mongolia_Arkhangai_Xiongnu	China_AmurRiver_Mesolithic	Han_Liaoning	Mbuti.DG	-0.015671	-25.843	5331	6437	70564
Iran_TepeAbdulHosein_N.SG	Mongolia_EIA_Xiongnu_7	Han_Liaoning	Mbuti.DG	-0.022162	-25.808	5308	6921	72795
Mongolia_LBA_MongunTaiga_3	China_Upper_YR_LN	Han_Liaoning	Mbuti.DG	-0.01405	-25.798	7054	8370	93688
Russia_Andronovo.SG	Nepal_Chokhopani_2800BP.SG	Han_Liaoning	Mbuti.DG	-0.018968	-25.797	7943	9946	105590
Iran_Hasanlu_IA.SG	China_AmurRiver_Mesolithic	Han_Liaoning	Mbuti.DG	-0.02275	-25.765	4696	6124	62768
Russia_Andronovo.SG	China_WLR_BA	Han_Liaoning	Mbuti.DG	-0.021543	-25.741	4215	5449	57283
Russia_Kalmykia_EBA_Yamnaya.SG	Taiwan_Gongguan	Han_Liaoning	Mbuti.DG	-0.022319	-25.723	4894	6360	65689
Ukraine_EBA_Yamnaya	China_WLR_LN	Han_Liaoning	Mbuti.DG	-0.023803	-25.715	4947	6548	67250
Iran_Hasanlu_IA.SG	China_AmurRiver_EarlyN	Han_Liaoning	Mbuti.DG	-0.022762	-25.707	4996	6506	66368
Mongolia_Arkhangai_XiongnuEarlyMedieval_2	Mongolia_Tuv_LatEMedieval	Han_Liaoning	Mbuti.DG	-0.017951	-25.688	5885	7313	79534
Iran_Hasanlu_IA.SG	Mongolia_LBA_Khovsgol_6	Han_Liaoning	Mbuti.DG	-0.016968	-25.687	6746	8278	90307
Iran_Wezmeh_N.SG	Taiwan_Gongguan	Han_Liaoning	Mbuti.DG	-0.025213	-25.683	4902	6580	66566
Russia_Caucasus_EBA_Yamnaya	China_AmurRiver_LPaleolithic	Han_Liaoning	Mbuti.DG	-0.019824	-25.556	4952	6255	65741
Hungary_LateC_EBA_Baden_Yamnaya	Mongolia_EIA_Xiongnu_7	Han_Liaoning	Mbuti.DG	-0.021092	-25.492	5150	6625	69928
Ukraine_EBA_Yamnaya	Nepal_Samdzong_1500BP.SG	Han_Liaoning	Mbuti.DG	-0.019963	-25.48	5750	7288	77071
Ukraine_EBA_Yamnaya	Mongolia_East_N	Han_Liaoning	Mbuti.DG	-0.020966	-25.478	5464	7016	73985
Russia_Andronovo.SG	Mongolia_EBA_Ulgii_1	Han_Liaoning	Mbuti.DG	-0.015534	-25.475	7061	8535	94926
Mongolia_Uvs_EIAXiongnuLateMedival	Russia_Buryatia_Xiongnu	Han_Liaoning	Mbuti.DG	-0.011927	-25.456	7442	8624	99089
Luxembourg_Loschbour.DG	Mongolia_Bulgan_Xiongnu	Han_Liaoning	Mbuti.DG	-0.018369	-25.443	6608	8232	88433
Mongolia_Uvs_EIAXiongnuLateMedival	Mongolia_Tuv_LatEMedieval	Han_Liaoning	Mbuti.DG	-0.013037	-25.434	6957	8169	92929
Luxembourg_Loschbour.DG	China_AmurRiver_LPaleolithic	Han_Liaoning	Mbuti.DG	-0.019029	-25.431	6066	7584	79742
Russia_Andronovo.SG	China_SEastAsia_Coastal_LN	Han_Liaoning	Mbuti.DG	-0.019785	-25.41	4798	6062	63857
Mongolia_LBA_CenterWest_5	China_YR_MN	Han_Liaoning	Mbuti.DG	-0.015976	-25.365	7411	8983	98412
Mongolia_Arkhangai_XiongnuEarlyMedieval_2	China_WLR_LN	Han_Liaoning	Mbuti.DG	-0.020418	-25.346	5387	6872	72751
Russia_Andronovo.SG	Taiwan_Gongguan	Han_Liaoning	Mbuti.DG	-0.02142	-25.344	4955	6378	66444
Luxembourg_Loschbour.DG	Mongolia_Tuv_Xiongnu	Han_Liaoning	Mbuti.DG	-0.019835	-25.335	6658	8430	89337
Mongolia_EIA_Sagly_4	China_WLR_MN	Han_Liaoning	Mbuti.DG	-0.013339	-25.316	7807	9185	103299
Hungary_LateC_EBA_Baden_Yamnaya	Nepal_Mebrak_2125BP.SG	Han_Liaoning	Mbuti.DG	-0.023574	-25.306	4175	5501	56255
Russia_Kalmykia_EBA_Yamnaya.SG	Nepal_Mebrak_2125BP.SG	Han_Liaoning	Mbuti.DG	-0.021636	-25.268	5046	6513	67813
Mongolia_Arkhangai_XiongnuEarlyMedieval_2	Nepal_Samdzong_1500BP.SG	Han_Liaoning	Mbuti.DG	-0.016899	-25.264	6327	7752	84330
Mongolia_Arkhangai_XiongnuEarlyMedieval_2	Russia_Buryatia_Xiongnu	Han_Liaoning	Mbuti.DG	-0.016563	-25.233	6141	7510	82617
Russia_Samara_EBA_Yamnaya	Nepal_Mebrak_2125BP.SG	Han_Liaoning	Mbuti.DG	-0.020728	-25.231	5080	6486	67836
Mongolia_LBA_CenterWest_5	Taiwan_Hanben_IA	Han_Liaoning	Mbuti.DG	-0.014475	-25.222	7507	8936	98756
Russia_Kalmykia_EBA_Yamnaya.SG	China_NEastAsia_Inland_EN	Han_Liaoning	Mbuti.DG	-0.020247	-25.208	5950	7572	80087
Iran_Hasanlu_IA.SG	Nepal_Chokhopani_2800BP.SG	Han_Liaoning	Mbuti.DG	-0.021224	-25.204	6845	8790	91680
Mongolia_Arkhangai_XiongnuEarlyMedieval_2	Russia_DevilsCave_N.SG	Han_Liaoning	Mbuti.DG	-0.018643	-25.201	6304	7877	84333
Luxembourg_Loschbour.DG	Mongolia_Khentii_Xiongnu	Han_Liaoning	Mbuti.DG	-0.020475	-25.189	6191	7887	82854
Mongolia_EIA_Sagly_4	Mongolia_Tuv_LatEMedieval	Han_Liaoning	Mbuti.DG	-0.012026	-25.186	7000	8119	93083
Hungary_LateC_EBA_Baden_Yamnaya	China_WLR_BA	Han_Liaoning	Mbuti.DG	-0.024198	-25.178	3454	4604	47499
Russia_Samara_EBA_Yamnaya	Mongolia_EIA_Xiongnu_7	Han_Liaoning	Mbuti.DG	-0.018466	-25.172	5703	7120	76738
Iran_Hasanlu_IA.SG	Mongolia_Bulgan_Xiongnu	Han_Liaoning	Mbuti.DG	-0.020238	-25.162	6033	7683	81573
Mongolia_LBA_CenterWest_5	China_Upper_YR_LN	Han_Liaoning	Mbuti.DG	-0.015801	-25.153	7376	8925	97988
Russia_Kalmykia_EBA_Yamnaya.SG	Mongolia_EIA_Xiongnu_7	Han_Liaoning	Mbuti.DG	-0.019362	-25.101	5598	7072	76114
Iran_Wezmeh_N.SG	China_NEastAsia_Inland_EN	Han_Liaoning	Mbuti.DG	-0.02282	-25.085	6040	7900	81507
Iran_Hasanlu_IA.SG	China_AmurRiver_LPaleolithic	Han_Liaoning	Mbuti.DG	-0.021697	-25.084	5559	7157	73617
Mongolia_EIA_Sagly_4	Russia_DevilsCave_N.SG	Han_Liaoning	Mbuti.DG	-0.012769	-25.078	7901	9229	104002
Mongolia_Arkhangai_XiongnuEarlyMedieval_2	Mongolia_East_N	Han_Liaoning	Mbuti.DG	-0.017774	-25.059	5879	7285	79105
Mongolia_Uvs_EIAXiongnuLateMedival	Mongolia_LBA_CenterWest_4	Han_Liaoning	Mbuti.DG	-0.009707	-25.057	7516	8486	99971
Mongolia_Arkhangai_Xiongnu	China_AmurRiver_LPaleolithic	Han_Liaoning	Mbuti.DG	-0.014925	-25.028	6375	7618	83283
Mongolia_LBA_MongunTaiga_3	China_YR_MN	Han_Liaoning	Mbuti.DG	-0.014225	-24.997	7130	8469	94151
Russia_Samara_EBA_Yamnaya	China_NEastAsia_Inland_EN	Han_Liaoning	Mbuti.DG	-0.019084	-24.98	6048	7587	80631
Russia_Caucasus_EBA_Yamnaya	Mongolia_Khentii_Xiongnu	Han_Liaoning	Mbuti.DG	-0.021223	-24.932	4996	6428	67472
Iran_Wezmeh_N.SG	Mongolia_EIA_Xiongnu_7	Han_Liaoning	Mbuti.DG	-0.022147	-24.878	5668	7382	77431
Russia_Caucasus_EBA_Yamnaya	Mongolia_Bulgan_Xiongnu	Han_Liaoning	Mbuti.DG	-0.019098	-24.876	5118	6436	69023
Russia_Caucasus_EBA_Yamnaya	China_SEastAsia_Coastal_LN	Han_Liaoning	Mbuti.DG	-0.01989	-24.704	3954	5021	53651
Ukraine_EBA_Yamnaya	Mongolia_LBA_CenterWest_4	Han_Liaoning	Mbuti.DG	-0.017284	-24.637	5598	6922	76622
Mongolia_Uvs_EIAXiongnuLateMedival	Nepal_Samdzong_1500BP.SG	Han_Liaoning	Mbuti.DG	-0.012263	-24.63	7955	9228	103766
Ukraine_EBA_Yamnaya	China_AmurRiver_EarlyN	Han_Liaoning	Mbuti.DG	-0.022253	-24.619	4805	6246	64734
Mongolia_Arkhangai_XiongnuEarlyMedieval_2	Mongolia_LBA_CenterWest_4	Han_Liaoning	Mbuti.DG	-0.014139	-24.542	6193	7369	83195
Mongolia_LBA_CenterWest_5	China_NEastAsia_Coastal_EN	Han_Liaoning	Mbuti.DG	-0.015085	-24.515	7075	8490	93861
Mongolia_LBA_MongunTaiga_3	China_NEastAsia_Coastal_EN	Han_Liaoning	Mbuti.DG	-0.013184	-24.507	6894	8094	91049
Iran_Hasanlu_IA.SG	Mongolia_Khentii_Xiongnu	Han_Liaoning	Mbuti.DG	-0.022612	-24.448	5689	7421	76601
Iran_Hasanlu_IA.SG	China_SEastAsia_Coastal_LN	Han_Liaoning	Mbuti.DG	-0.022243	-24.336	4227	5488	56689
Mongolia_Arkhangai_Xiongnu	China_AmurRiver_EarlyN	Han_Liaoning	Mbuti.DG	-0.016419	-24.334	5618	6846	74803
Russia_Caucasus_EBA_Yamnaya	Mongolia_Tuv_Xiongnu	Han_Liaoning	Mbuti.DG	-0.02007	-24.228	5150	6538	69163
Luxembourg_Loschbour.DG	Nepal_Chokhopani_2800BP.SG	Han_Liaoning	Mbuti.DG	-0.019164	-24.224	7606	9524	100063
Ukraine_EBA_Yamnaya	Mongolia_LBA_Khovsgol_6	Han_Liaoning	Mbuti.DG	-0.01618	-24.139	5659	6904	76974
Mongolia_EIA_Sagly_4	Mongolia_LBA_CenterWest_4	Han_Liaoning	Mbuti.DG	-0.008483	-24.137	7573	8424	100337
Mongolia_LBA_CenterWest_5	China_Shimao_LN	Han_Liaoning	Mbuti.DG	-0.015745	-24.065	7391	8932	97854
Ukraine_EBA_Yamnaya	China_AmurRiver_LPaleolithic	Han_Liaoning	Mbuti.DG	-0.020353	-23.948	5245	6660	69506
Russia_Andronovo.SG	Nepal_Mebrak_2125BP.SG	Han_Liaoning	Mbuti.DG	-0.02045	-23.908	5206	6635	69872
Mongolia_Uvs_EIAXiongnuLateMedival	China_AmurRiver_Mesolithic	Han_Liaoning	Mbuti.DG	-0.013346	-23.863	5349	6293	70686
Ukraine_EBA_Yamnaya	China_AmurRiver_Mesolithic	Han_Liaoning	Mbuti.DG	-0.021148	-23.817	4593	5904	61987
Iran_Hasanlu_IA.SG	Taiwan_Gongguan	Han_Liaoning	Mbuti.DG	-0.023658	-23.785	4404	5800	59018
Mongolia_LBA_MongunTaiga_3	China_Shimao_LN	Han_Liaoning	Mbuti.DG	-0.014093	-23.772	7073	8392	93607
Mongolia_Arkhangai_Xiongnu	Mongolia_Bulgan_Xiongnu	Han_Liaoning	Mbuti.DG	-0.013995	-23.741	6923	8214	92270
Luxembourg_Loschbour.DG	Nepal_Mebrak_2125BP.SG	Han_Liaoning	Mbuti.DG	-0.021215	-23.702	4948	6354	66283
Luxembourg_Loschbour.DG	China_WLR_BA	Han_Liaoning	Mbuti.DG	-0.021654	-23.696	3988	5167	54431
Mongolia_LBA_CenterWest_5	China_Upper_YR_IA	Han_Liaoning	Mbuti.DG	-0.015632	-23.647	7199	8693	95575
Russia_Andronovo.SG	China_NEastAsia_Inland_EN	Han_Liaoning	Mbuti.DG	-0.019195	-23.624	6090	7650	81271
Mongolia_Arkhangai_XiongnuEarlyMedieval_2	China_AmurRiver_Mesolithic	Han_Liaoning	Mbuti.DG	-0.018026	-23.565	4820	5981	64451
Mongolia_EIA_Sagly_4	Nepal_Samdzong_1500BP.SG	Han_Liaoning	Mbuti.DG	-0.011017	-23.545	8008	9154	104003
Mongolia_Arkhangai_Xiongnu	Mongolia_Tuv_Xiongnu	Han_Liaoning	Mbuti.DG	-0.015703	-23.475	7028	8491	93166
Iran_Hasanlu_IA.SG	China_NEastAsia_Inland_EN	Han_Liaoning	Mbuti.DG	-0.022085	-23.471	5362	6947	71757
Mongolia_Arkhangai_XiongnuEarlyMedieval_2	China_AmurRiver_EarlyN	Han_Liaoning	Mbuti.DG	-0.018807	-23.458	5010	6281	67539
Mongolia_LBA_CenterWest_5	Mongolia_EIA_SlabGrave_1	Han_Liaoning	Mbuti.DG	-0.01271	-23.403	7375	8615	97629
Luxembourg_Loschbour.DG	China_SEastAsia_Coastal_LN	Han_Liaoning	Mbuti.DG	-0.019717	-23.32	4593	5795	60985
Russia_Andronovo.SG	Mongolia_EIA_Xiongnu_7	Han_Liaoning	Mbuti.DG	-0.018035	-23.283	5735	7128	77246
Mongolia_Arkhangai_XiongnuEarlyMedieval_2	Mongolia_LBA_Khovsgol_6	Han_Liaoning	Mbuti.DG	-0.013032	-23.27	6276	7371	84033
Mongolia_LBA_MongunTaiga_3	Mongolia_EIA_SlabGrave_1	Han_Liaoning	Mbuti.DG	-0.010974	-23.225	7107	8137	93887
Mongolia_LBA_MongunTaiga_3	Russia_MN_Boisman	Han_Liaoning	Mbuti.DG	-0.012382	-23.204	6806	7921	89978
Ukraine_EBA_Yamnaya	China_SEastAsia_Coastal_LN	Han_Liaoning	Mbuti.DG	-0.021567	-23.192	4066	5268	55727
Iran_Hasanlu_IA.SG	Nepal_Mebrak_2125BP.SG	Han_Liaoning	Mbuti.DG	-0.022392	-23.183	4511	5881	61176
Mongolia_EIA_Sagly_4	China_AmurRiver_Mesolithic	Han_Liaoning	Mbuti.DG	-0.01209	-23.18	5360	6215	70732
Mongolia_LBA_CenterWest_5	Russia_MN_Boisman	Han_Liaoning	Mbuti.DG	-0.014076	-23.173	6950	8250	92319
Russia_Caucasus_EBA_Yamnaya	Nepal_Chokhopani_2800BP.SG	Han_Liaoning	Mbuti.DG	-0.020114	-23.103	5410	6862	72193
Mongolia_LBA_MongunTaiga_3	China_Upper_YR_IA	Han_Liaoning	Mbuti.DG	-0.014026	-23.098	6938	8223	91615
Mongolia_Arkhangai_Xiongnu	Mongolia_Khentii_Xiongnu	Han_Liaoning	Mbuti.DG	-0.015791	-23.087	6452	7822	86734
Mongolia_Uvs_EIAXiongnuLateMedival	China_AmurRiver_EarlyN	Han_Liaoning	Mbuti.DG	-0.013857	-23.082	5635	6674	74930
Iran_TepeAbdulHosein_N.SG	Mongolia_EIA_Sagly_4	Han_Liaoning	Mbuti.DG	-0.011669	-23.046	7154	8280	96434
Iran_Hasanlu_IA.SG	Mongolia_EBA_Ulgii_1	Han_Liaoning	Mbuti.DG	-0.017641	-23.026	6225	7691	83131
Mongolia_EIA_Sagly_4	Mongolia_East_N	Han_Liaoning	Mbuti.DG	-0.011759	-23.022	6963	8050	92458
Luxembourg_Loschbour.DG	Mongolia_EBA_Ulgii_1	Han_Liaoning	Mbuti.DG	-0.015679	-23.018	6770	8183	90120
Mongolia_Arkhangai_Xiongnu	China_SEastAsia_Coastal_LN	Han_Liaoning	Mbuti.DG	-0.015276	-23.015	4799	5772	63677
Mongolia_EIA_Pazyryk_6	China_YR_LBIA	Han_Liaoning	Mbuti.DG	-0.016174	-23	5847	7112	78244
Iran_GanjDareh_N	China_Miaozigou_MN	Han_Liaoning	Mbuti.DG	-0.026305	-22.94	2176	2963	29908
Mongolia_EIA_Sagly_4	Mongolia_LBA_Khovsgol_6	Han_Liaoning	Mbuti.DG	-0.007129	-22.938	7838	8571	102851
Russia_Alan.SG	Mongolia_EIA_Sagly_4	Han_Liaoning	Mbuti.DG	-0.009131	-22.912	7710	8654	103315
Iran_GanjDareh_N	Japan_Jomon.SG	Han_Liaoning	Mbuti.DG	-0.01836	-22.9	5899	7332	78077
Luxembourg_Loschbour.DG	Taiwan_Gongguan	Han_Liaoning	Mbuti.DG	-0.021055	-22.887	4756	6090	63336
Ukraine_EBA_Yamnaya	Nepal_Chokhopani_2800BP.SG	Han_Liaoning	Mbuti.DG	-0.020629	-22.868	5748	7335	76902
Mongolia_Uvs_EIAXiongnuLateMedival	Mongolia_LBA_Khovsgol_6	Han_Liaoning	Mbuti.DG	-0.00835	-22.776	7784	8640	102554
Russia_MLBA_Sintashta	China_Miaozigou_MN	Han_Liaoning	Mbuti.DG	-0.022492	-22.769	2302	3001	31061
Iran_GanjDareh_N	Mongolia_Uvs_EIAXiongnuLateMedival	Han_Liaoning	Mbuti.DG	-0.010707	-22.763	7378	8429	98231
Ukraine_EBA_Yamnaya	Mongolia_Khentii_Xiongnu	Han_Liaoning	Mbuti.DG	-0.020987	-22.762	5230	6727	71352
Mongolia_LBA_CenterWest_5	China_WLR_LN	Han_Liaoning	Mbuti.DG	-0.016316	-22.761	6237	7595	83229
Mongolia_EIA_Pazyryk_6	China_YR_LN	Han_Liaoning	Mbuti.DG	-0.015782	-22.713	5916	7154	78491
China_AmurRiver_Paleolithic	China_YR_LBIA	Han_Liaoning	Mbuti.DG	-0.016501	-22.702	6976	8511	92977
Iran_Hasanlu_IA.SG	China_WLR_BA	Han_Liaoning	Mbuti.DG	-0.023173	-22.669	3690	4858	50401
Ukraine_EBA_Yamnaya	Mongolia_Bulgan_Xiongnu	Han_Liaoning	Mbuti.DG	-0.019096	-22.651	5407	6803	73092
Luxembourg_Loschbour.DG	China_NEastAsia_Inland_EN	Han_Liaoning	Mbuti.DG	-0.019517	-22.586	5835	7344	77315
Iran_GanjDareh_N	Mongolia_LBA_MongunTaiga_3	Han_Liaoning	Mbuti.DG	-0.012209	-22.583	6820	7942	91923
Mongolia_Uvs_EIAXiongnuLateMedival	Mongolia_East_N	Han_Liaoning	Mbuti.DG	-0.01283	-22.574	6920	8104	92232
Russia_Caucasus_EBA_Yamnaya	Taiwan_Gongguan	Han_Liaoning	Mbuti.DG	-0.021806	-22.549	4157	5382	56182
Iran_TepeAbdulHosein_N.SG	Japan_Jomon.SG	Han_Liaoning	Mbuti.DG	-0.018091	-22.517	5771	7172	77479
Mongolia_Arkhangai_Xiongnu	Nepal_Chokhopani_2800BP.SG	Han_Liaoning	Mbuti.DG	-0.01486	-22.516	7832	9363	102990
Mongolia_Uvs_EIAXiongnuLateMedival	China_AmurRiver_LPaleolithic	Han_Liaoning	Mbuti.DG	-0.012342	-22.499	6381	7411	83483
Ukraine_EBA_Yamnaya	Mongolia_Tuv_Xiongnu	Han_Liaoning	Mbuti.DG	-0.020436	-22.459	5389	6886	73237
Mongolia_Arkhangai_XiongnuEarlyMedieval_2	Mongolia_Tuv_Xiongnu	Han_Liaoning	Mbuti.DG	-0.017917	-22.449	5886	7303	79099
Russia_Caucasus_EBA_Yamnaya	Nepal_Mebrak_2125BP.SG	Han_Liaoning	Mbuti.DG	-0.021948	-22.313	3670	4757	49504
Ukraine_EBA_Yamnaya	Taiwan_Gongguan	Han_Liaoning	Mbuti.DG	-0.022703	-22.313	4357	5692	58800
Mongolia_Arkhangai_XiongnuEarlyMedieval_2	China_AmurRiver_LPaleolithic	Han_Liaoning	Mbuti.DG	-0.017175	-22.308	5589	6851	73491
China_Tianyuan	China_YR_LN	Han_Liaoning	Mbuti.DG	-0.016088	-22.251	6257	7601	83537
Mongolia_Arkhangai_Xiongnu	Taiwan_Gongguan	Han_Liaoning	Mbuti.DG	-0.016807	-22.247	5017	6132	66363
Mongolia_Arkhangai_XiongnuEarlyMedieval_2	Mongolia_Khentii_Xiongnu	Han_Liaoning	Mbuti.DG	-0.018179	-22.24	5636	7017	75926
China_AmurRiver_Paleolithic	China_YR_LN	Han_Liaoning	Mbuti.DG	-0.016079	-22.238	7012	8513	93356
Mongolia_EIA_Sagly_4	China_AmurRiver_EarlyN	Han_Liaoning	Mbuti.DG	-0.012903	-22.227	5654	6622	75029
Russia_MLBA_Sintashta	Mongolia_Uvs_EIAXiongnuLateMedival	Han_Liaoning	Mbuti.DG	-0.007456	-22.151	7638	8407	103054
Russia_Samara_EBA_Yamnaya	Mongolia_EIA_Sagly_4	Han_Liaoning	Mbuti.DG	-0.007838	-22.127	7479	8270	100912
Russia_Afanasievo	China_Miaozigou_MN	Han_Liaoning	Mbuti.DG	-0.02194	-22.091	2288	2968	30997
Russia_Alan.SG	China_Miaozigou_MN	Han_Liaoning	Mbuti.DG	-0.023119	-22.044	2274	2992	31081
Mongolia_Arkhangai_XiongnuEarlyMedieval_2	Mongolia_Bulgan_Xiongnu	Han_Liaoning	Mbuti.DG	-0.016188	-22.022	5864	7140	78825
Mongolia_LBA_CenterWest_5	Russia_DevilsCave_N.SG	Han_Liaoning	Mbuti.DG	-0.014463	-21.948	7478	8909	98907
Iran_GanjDareh_N	Vietnam_BA	Han_Liaoning	Mbuti.DG	-0.023541	-21.942	2395	3168	32823
Iran_TepeAbdulHosein_N.SG	China_Miaozigou_MN	Han_Liaoning	Mbuti.DG	-0.025983	-21.882	2109	2870	29297
Russia_Caucasus_EBA_Yamnaya	Mongolia_EBA_Ulgii_1	Han_Liaoning	Mbuti.DG	-0.016025	-21.856	5233	6366	70667
Mongolia_EIA_Sagly_4	China_AmurRiver_LPaleolithic	Han_Liaoning	Mbuti.DG	-0.011241	-21.854	6426	7366	83632
Mongolia_LBA_CenterWest_5	China_AmurRiver_N	Han_Liaoning	Mbuti.DG	-0.013918	-21.836	6093	7217	80734
Russia_Caucasus_EBA_Yamnaya	Mongolia_EIA_Xiongnu_7	Han_Liaoning	Mbuti.DG	-0.018601	-21.835	4627	5803	63271
Mongolia_LBA_MongunTaiga_3	Russia_DevilsCave_N.SG	Han_Liaoning	Mbuti.DG	-0.012641	-21.823	7208	8403	94534
Russia_Caucasus_EBA_Yamnaya	China_WLR_BA	Han_Liaoning	Mbuti.DG	-0.02217	-21.806	3130	4068	42304
Russia_MLBA_Sintashta	Japan_Jomon.SG	Han_Liaoning	Mbuti.DG	-0.014957	-21.684	6281	7514	82381
Iran_GanjDareh_N	China_AR_EN	Han_Liaoning	Mbuti.DG	-0.023819	-21.672	2408	3187	32706
Iran_Hasanlu_IA.SG	Mongolia_EIA_Xiongnu_7	Han_Liaoning	Mbuti.DG	-0.02042	-21.668	5074	6470	68370
Mongolia_Arkhangai_Xiongnu	China_WLR_BA	Han_Liaoning	Mbuti.DG	-0.017055	-21.647	4195	5157	56441
Mongolia_EIA_Pazyryk_6	China_YR_MN	Han_Liaoning	Mbuti.DG	-0.01607	-21.635	5874	7131	78207
Mongolia_LBA_MongunTaiga_3	China_AmurRiver_N	Han_Liaoning	Mbuti.DG	-0.012126	-21.628	6029	6994	79591
Mongolia_LBA_MongunTaiga_3	China_WLR_LN	Han_Liaoning	Mbuti.DG	-0.014561	-21.609	6060	7232	80479
China_Tianyuan	China_YR_LBIA	Han_Liaoning	Mbuti.DG	-0.016271	-21.606	6257	7612	83268
Russia_Caucasus_EBA_Yamnaya	China_NEastAsia_Inland_EN	Han_Liaoning	Mbuti.DG	-0.019606	-21.573	4836	6113	65129
China_AmurRiver_Paleolithic	China_Upper_YR_LN	Han_Liaoning	Mbuti.DG	-0.016007	-21.558	6965	8446	92494
Luxembourg_Loschbour.DG	Mongolia_EIA_Xiongnu_7	Han_Liaoning	Mbuti.DG	-0.018424	-21.55	5502	6858	73586
Mongolia_LBA_CenterWest_5	Mongolia_North_N	Han_Liaoning	Mbuti.DG	-0.0127	-21.527	7153	8361	95132
Mongolia_LBA_CenterWest_5	China_WLR_MN	Han_Liaoning	Mbuti.DG	-0.015007	-21.481	7441	8916	98285
China_AmurRiver_Paleolithic	China_YR_MN	Han_Liaoning	Mbuti.DG	-0.016569	-21.409	6945	8485	92948
Mongolia_EIA_2	China_YR_LBIA	Han_Liaoning	Mbuti.DG	-0.015869	-21.397	5734	6949	76594
Ukraine_EBA_Yamnaya	China_NEastAsia_Inland_EN	Han_Liaoning	Mbuti.DG	-0.020314	-21.368	5102	6498	68717
Mongolia_EIA_Pazyryk_6	Taiwan_Hanben_IA	Han_Liaoning	Mbuti.DG	-0.014602	-21.364	5926	7072	78463
Mongolia_Arkhangai_XiongnuEarlyMedieval_2	Nepal_Chokhopani_2800BP.SG	Han_Liaoning	Mbuti.DG	-0.01726	-21.36	6363	7816	84167
Iran_GanjDareh_N	China_AR_Xianbei_IA	Han_Liaoning	Mbuti.DG	-0.024344	-21.326	1894	2516	25545
Russia_Kalmykia_EBA_Yamnaya.SG	Mongolia_EIA_Sagly_4	Han_Liaoning	Mbuti.DG	-0.008519	-21.307	7416	8270	100243
Iran_TepeAbdulHosein_N.SG	Vietnam_BA	Han_Liaoning	Mbuti.DG	-0.023789	-21.287	2303	3053	31532
Mongolia_Arkhangai_XiongnuEarlyMedieval_2	China_SEastAsia_Coastal_LN	Han_Liaoning	Mbuti.DG	-0.017879	-21.264	4352	5393	58248
Mongolia_EIA_Pazyryk_6	China_Upper_YR_LN	Han_Liaoning	Mbuti.DG	-0.015548	-21.253	5830	7040	77806
Mongolia_EIA_2	China_YR_LN	Han_Liaoning	Mbuti.DG	-0.015879	-21.216	5774	6994	76819
Mongolia_LBA_MongunTaiga_3	China_WLR_MN	Han_Liaoning	Mbuti.DG	-0.013178	-21.2	7157	8396	93995
China_AmurRiver_Paleolithic	Taiwan_Hanben_IA	Han_Liaoning	Mbuti.DG	-0.014862	-21.185	7050	8436	93285
Ukraine_EBA_Yamnaya	China_WLR_BA	Han_Liaoning	Mbuti.DG	-0.023019	-21.135	3270	4299	44678
China_Tianyuan	China_YR_MN	Han_Liaoning	Mbuti.DG	-0.016405	-21.098	6227	7592	83231
Mongolia_Uvs_EIAXiongnuLateMedival	Mongolia_Tuv_Xiongnu	Han_Liaoning	Mbuti.DG	-0.013123	-21.08	7023	8250	93534
Mongolia_Uvs_EIAXiongnuLateMedival	Mongolia_Khentii_Xiongnu	Han_Liaoning	Mbuti.DG	-0.013443	-21.036	6488	7658	86967
Russia_Alan.SG	Japan_Jomon.SG	Han_Liaoning	Mbuti.DG	-0.015488	-20.986	6302	7587	82946
Ukraine_EBA_Yamnaya	Nepal_Mebrak_2125BP.SG	Han_Liaoning	Mbuti.DG	-0.022324	-20.983	3899	5071	52487
Mongolia_Arkhangai_Xiongnu	Nepal_Mebrak_2125BP.SG	Han_Liaoning	Mbuti.DG	-0.016563	-20.972	5200	6333	68408
Hungary_LateC_EBA_Baden_Yamnaya	Mongolia_EIA_Sagly_4	Han_Liaoning	Mbuti.DG	-0.010427	-20.921	6133	6996	82780
Iran_GanjDareh_N	Russia_EarlyMedieval_Heshui_Mohe_1	Han_Liaoning	Mbuti.DG	-0.024208	-20.916	2172	2886	29513
Mongolia_Uvs_EIAXiongnuLateMedival	Mongolia_Bulgan_Xiongnu	Han_Liaoning	Mbuti.DG	-0.011472	-20.911	7014	8076	92581
Russia_MLBA_Sintashta	China_AR_EN	Han_Liaoning	Mbuti.DG	-0.020895	-20.9	2523	3231	33901
Mongolia_LBA_CenterWest_5	Russia_Buryatia_Xiongnu	Han_Liaoning	Mbuti.DG	-0.012358	-20.891	7178	8358	95464
Mongolia_LBA_CenterWest_5	Mongolia_Tuv_LatEMedieval	Han_Liaoning	Mbuti.DG	-0.01355	-20.878	6777	8000	90213
Russia_Kalmykia_EBA_Yamnaya.SG	China_Miaozigou_MN	Han_Liaoning	Mbuti.DG	-0.022723	-20.867	2226	2918	30444
Mongolia_Uvs_EIAXiongnuLateMedival	China_WLR_BA	Han_Liaoning	Mbuti.DG	-0.014994	-20.834	4246	5097	56732
China_Xinjian_IA.SG	China_YR_LBIA	Han_Liaoning	Mbuti.DG	-0.013113	-20.822	5593	6570	74507
Ukraine_EBA_Yamnaya	Mongolia_EBA_Ulgii_1	Han_Liaoning	Mbuti.DG	-0.016352	-20.743	5543	6772	75165
Mongolia_Arkhangai_Xiongnu	Mongolia_EBA_Ulgii_1	Han_Liaoning	Mbuti.DG	-0.011022	-20.733	7155	8195	94305
Mongolia_EIA_Sagly_4	Mongolia_Bulgan_Xiongnu	Han_Liaoning	Mbuti.DG	-0.010624	-20.693	7017	8002	92746
Russia_MLBA_Sintashta	Mongolia_LBA_MongunTaiga_3	Han_Liaoning	Mbuti.DG	-0.008864	-20.661	6940	7776	94360
Iran_Wezmeh_N.SG	Japan_Jomon.SG	Han_Liaoning	Mbuti.DG	-0.017767	-20.649	6313	7795	83418
Mongolia_EIA_Pazyryk_6	China_Shimao_LN	Han_Liaoning	Mbuti.DG	-0.015803	-20.641	5847	7076	77822
Russia_MLBA_Sintashta	Vietnam_BA	Han_Liaoning	Mbuti.DG	-0.020217	-20.622	2445	3113	33040
Mongolia_LBA_MongunTaiga_3	Mongolia_Tuv_LatEMedieval	Han_Liaoning	Mbuti.DG	-0.011653	-20.593	6648	7672	87861
Mongolia_Arkhangai_XiongnuEarlyMedieval_2	China_WLR_BA	Han_Liaoning	Mbuti.DG	-0.018857	-20.579	3580	4489	48206
China_Xinjian_IA.SG	China_YR_LN	Han_Liaoning	Mbuti.DG	-0.012928	-20.578	5671	6640	74943
Russia_Samara_EBA_Yamnaya	China_Miaozigou_MN	Han_Liaoning	Mbuti.DG	-0.02194	-20.556	2247	2915	30441
China_AmurRiver_Paleolithic	China_Shimao_LN	Han_Liaoning	Mbuti.DG	-0.016217	-20.527	6947	8446	92441
Mongolia_Arkhangai_XiongnuEarlyMedieval_2	Taiwan_Gongguan	Han_Liaoning	Mbuti.DG	-0.018995	-20.512	4561	5716	60859
Mongolia_EIA_Sagly_4	China_SEastAsia_Coastal_LN	Han_Liaoning	Mbuti.DG	-0.01174	-20.501	4864	5614	63876
Mongolia_LBA_Khovsgol_6	China_YR_LN	Han_Liaoning	Mbuti.DG	-0.007101	-20.5	8030	8772	104489
China_Tianyuan	Taiwan_Hanben_IA	Han_Liaoning	Mbuti.DG	-0.014703	-20.483	6294	7522	83507
Russia_Afanasievo	Japan_Jomon.SG	Han_Liaoning	Mbuti.DG	-0.014371	-20.458	6266	7444	82022
China_Tianyuan	China_Upper_YR_LN	Han_Liaoning	Mbuti.DG	-0.015901	-20.433	6216	7532	82804
Mongolia_Arkhangai_Xiongnu	China_NEastAsia_Inland_EN	Han_Liaoning	Mbuti.DG	-0.014849	-20.389	6064	7266	80972
Mongolia_LBA_MongunTaiga_3	Mongolia_North_N	Han_Liaoning	Mbuti.DG	-0.010899	-20.369	6994	8000	92331
Mongolia_LBA_CenterWest_5	Nepal_Samdzong_1500BP.SG	Han_Liaoning	Mbuti.DG	-0.01265	-20.353	7601	8852	98905
Ukraine_EBA_Yamnaya	Mongolia_EIA_Xiongnu_7	Han_Liaoning	Mbuti.DG	-0.019164	-20.336	4869	6150	66873
Mongolia_EIA_Sagly_4	Mongolia_Khentii_Xiongnu	Han_Liaoning	Mbuti.DG	-0.012225	-20.307	6530	7595	87103
Mongolia_EIA_Pazyryk_6	China_Upper_YR_IA	Han_Liaoning	Mbuti.DG	-0.015703	-20.29	5765	6965	76379
Laos_Hoabinhian.SG	China_YR_LBIA	Han_Liaoning	Mbuti.DG	-0.017777	-20.262	2992	3723	41102
Mongolia_Arkhangai_XiongnuEarlyMedieval_2	Nepal_Mebrak_2125BP.SG	Han_Liaoning	Mbuti.DG	-0.019089	-20.217	4286	5376	57052
Iran_TepeAbdulHosein_N.SG	China_AR_EN	Han_Liaoning	Mbuti.DG	-0.023422	-20.216	2362	3112	32003
Mongolia_Uvs_EIAXiongnuLateMedival	China_SEastAsia_Coastal_LN	Han_Liaoning	Mbuti.DG	-0.012712	-20.211	4859	5670	63797
Mongolia_LBA_MongunTaiga_3	Nepal_Samdzong_1500BP.SG	Han_Liaoning	Mbuti.DG	-0.011009	-20.196	7285	8326	94531
Russia_Afanasievo	Vietnam_BA	Han_Liaoning	Mbuti.DG	-0.019699	-20.187	2444	3095	33043
Russia_Afanasievo	China_AR_EN	Han_Liaoning	Mbuti.DG	-0.020135	-20.18	2528	3209	33834
Russia_MLBA_Sintashta	China_AR_Xianbei_IA	Han_Liaoning	Mbuti.DG	-0.020375	-20.113	1996	2539	26622
China_Tianyuan	China_NEastAsia_Coastal_EN	Han_Liaoning	Mbuti.DG	-0.015019	-20.01	6170	7400	81947
China_AmurRiver_Paleolithic	China_NEastAsia_Coastal_EN	Han_Liaoning	Mbuti.DG	-0.015226	-20.004	6830	8207	90408
Russia_MLBA_Sintashta	Russia_EarlyMedieval_Heshui_Mohe_1	Han_Liaoning	Mbuti.DG	-0.021209	-19.997	2195	2824	29679
Mongolia_Arkhangai_Xiongnu	Mongolia_EIA_Xiongnu_7	Han_Liaoning	Mbuti.DG	-0.013959	-19.997	5782	6858	77099
Mongolia_EIA_2	China_NEastAsia_Coastal_EN	Han_Liaoning	Mbuti.DG	-0.015028	-19.967	5685	6820	75486
Mongolia_EIA_2	China_YR_MN	Han_Liaoning	Mbuti.DG	-0.015972	-19.938	5743	6966	76556
Iran_TepeAbdulHosein_N.SG	Russia_EarlyMedieval_Heshui_Mohe_1	Han_Liaoning	Mbuti.DG	-0.024568	-19.937	2057	2747	28096
Mongolia_Arkhangai_XiongnuEarlyMedieval_2	China_NEastAsia_Inland_EN	Han_Liaoning	Mbuti.DG	-0.01694	-19.915	5390	6614	72251
Mongolia_EIA_2	China_Upper_YR_LN	Han_Liaoning	Mbuti.DG	-0.015509	-19.906	5735	6916	76152
Mongolia_EIA_Pazyryk_6	China_NEastAsia_Coastal_EN	Han_Liaoning	Mbuti.DG	-0.014824	-19.894	5762	6904	76993
China_AmurRiver_Paleolithic	China_Upper_YR_IA	Han_Liaoning	Mbuti.DG	-0.015927	-19.853	6777	8218	90447
China_Tianyuan	China_Shimao_LN	Han_Liaoning	Mbuti.DG	-0.016105	-19.789	6225	7559	82815
Mongolia_LBA_Khovsgol_6	China_YR_LBIA	Han_Liaoning	Mbuti.DG	-0.007314	-19.785	7955	8715	103906
Mongolia_EIA_2	Taiwan_Hanben_IA	Han_Liaoning	Mbuti.DG	-0.014509	-19.749	5821	6936	76802
Mongolia_LBA_MongunTaiga_3	Russia_Buryatia_Xiongnu	Han_Liaoning	Mbuti.DG	-0.010614	-19.749	7006	7985	92179
Mongolia_LBA_CenterWest_5	China_AmurRiver_Mesolithic	Han_Liaoning	Mbuti.DG	-0.013898	-19.698	5288	6255	69581
Russia_Alan.SG	China_AR_EN	Han_Liaoning	Mbuti.DG	-0.021403	-19.626	2542	3268	33916
Russia_Afanasievo	Russia_EarlyMedieval_Heshui_Mohe_1	Han_Liaoning	Mbuti.DG	-0.020702	-19.623	2200	2814	29676
Mongolia_Arkhangai_XiongnuEarlyMedieval_2	Mongolia_EBA_Ulgii_1	Han_Liaoning	Mbuti.DG	-0.013257	-19.507	6036	7106	80739
Mongolia_LBA_CenterWest_5	Mongolia_East_N	Han_Liaoning	Mbuti.DG	-0.013344	-19.504	6784	7984	89961
Laos_Hoabinhian.SG	China_YR_LN	Han_Liaoning	Mbuti.DG	-0.017658	-19.491	3014	3745	41351
Mongolia_LBA_MongunTaiga_3	China_AmurRiver_Mesolithic	Han_Liaoning	Mbuti.DG	-0.012065	-19.483	5223	6056	69019
Iran_GanjDareh_N	China_Xinjian_IA.SG	Han_Liaoning	Mbuti.DG	-0.013121	-19.473	5274	6196	70238
China_Xinjian_IA.SG	China_YR_MN	Han_Liaoning	Mbuti.DG	-0.013156	-19.473	5626	6608	74582
Mongolia_Uvs_EIAXiongnuLateMedival	Nepal_Chokhopani_2800BP.SG	Han_Liaoning	Mbuti.DG	-0.01248	-19.473	7944	9237	103588
Mongolia_EIA_Sagly_4	Mongolia_Tuv_Xiongnu	Han_Liaoning	Mbuti.DG	-0.01177	-19.404	7091	8194	93713
Iran_Wezmeh_N.SG	China_Miaozigou_MN	Han_Liaoning	Mbuti.DG	-0.024589	-19.403	2326	3095	31282
China_Tianyuan	Russia_MN_Boisman	Han_Liaoning	Mbuti.DG	-0.014298	-19.399	6027	7177	80463
Mongolia_EIA_Pazyryk_6	Russia_MN_Boisman	Han_Liaoning	Mbuti.DG	-0.013977	-19.389	5765	6835	76597
Mongolia_Uvs_EIAXiongnuLateMedival	Taiwan_Gongguan	Han_Liaoning	Mbuti.DG	-0.014292	-19.379	5060	6010	66444
Mongolia_EIA_Pazyryk_6	Mongolia_EIA_SlabGrave_1	Han_Liaoning	Mbuti.DG	-0.012797	-19.371	5865	6866	78247
China_Tianyuan	China_Upper_YR_IA	Han_Liaoning	Mbuti.DG	-0.015752	-19.369	6149	7428	81229
Mongolia_LBA_MongunTaiga_3	Mongolia_East_N	Han_Liaoning	Mbuti.DG	-0.011475	-19.321	6655	7661	87652
China_AmurRiver_Paleolithic	Russia_MN_Boisman	Han_Liaoning	Mbuti.DG	-0.014421	-19.29	6689	7968	88674
Mongolia_LBA_CenterWest_5	China_AmurRiver_EarlyN	Han_Liaoning	Mbuti.DG	-0.014708	-19.267	5551	6634	73674
Iran_Wezmeh_N.SG	Mongolia_EIA_Sagly_4	Han_Liaoning	Mbuti.DG	-0.011481	-19.264	7832	9025	103965
Iran_Wezmeh_N.SG	China_AR_EN	Han_Liaoning	Mbuti.DG	-0.023801	-19.254	2520	3332	34110
Mongolia_EIA_Pazyryk_6	Russia_DevilsCave_N.SG	Han_Liaoning	Mbuti.DG	-0.014513	-19.233	5914	7053	78477
Mongolia_EIA_Pazyryk_6	China_WLR_MN	Han_Liaoning	Mbuti.DG	-0.015282	-19.219	5813	7007	78105
China_Tianyuan	Russia_DevilsCave_N.SG	Han_Liaoning	Mbuti.DG	-0.01503	-19.211	6300	7555	83519
Mongolia_EIA_Sagly_4	China_WLR_BA	Han_Liaoning	Mbuti.DG	-0.013492	-19.191	4281	5048	56808
Russia_Afanasievo	Mongolia_Uvs_EIAXiongnuLateMedival	Han_Liaoning	Mbuti.DG	-0.00676	-19.162	7649	8343	102681
Hungary_LateC_EBA_Baden_Yamnaya	Japan_Jomon.SG	Han_Liaoning	Mbuti.DG	-0.01697	-19.144	4954	6062	65348
Mongolia_EIA_2	China_Shimao_LN	Han_Liaoning	Mbuti.DG	-0.015828	-19.133	5714	6919	76163
Iran_TepeAbdulHosein_N.SG	Mongolia_Uvs_EIAXiongnuLateMedival	Han_Liaoning	Mbuti.DG	-0.010361	-19.091	7160	8157	96198
Russia_Kalmykia_EBA_Yamnaya.SG	Japan_Jomon.SG	Han_Liaoning	Mbuti.DG	-0.015012	-19.051	6046	7248	80014
Hungary_LateC_EBA_Baden_Yamnaya	China_Miaozigou_MN	Han_Liaoning	Mbuti.DG	-0.024531	-19.033	1877	2507	25683
Russia_Kalmykia_EBA_Yamnaya.SG	China_AR_EN	Han_Liaoning	Mbuti.DG	-0.020934	-19.023	2466	3160	33196
China_AmurRiver_Paleolithic	Russia_DevilsCave_N.SG	Han_Liaoning	Mbuti.DG	-0.014845	-18.994	6995	8381	93347
Russia_Samara_EBA_Yamnaya	Japan_Jomon.SG	Han_Liaoning	Mbuti.DG	-0.014211	-18.982	6115	7254	80144
China_AmurRiver_Paleolithic	China_WLR_LN	Han_Liaoning	Mbuti.DG	-0.016521	-18.969	5928	7239	79354
Mongolia_LBA_CenterWest_5	China_AmurRiver_LPaleolithic	Han_Liaoning	Mbuti.DG	-0.012879	-18.937	6268	7322	81779
Laos_Hoabinhian.SG	China_YR_MN	Han_Liaoning	Mbuti.DG	-0.018149	-18.897	2996	3743	41148
Mongolia_Uvs_EIAXiongnuLateMedival	Nepal_Mebrak_2125BP.SG	Han_Liaoning	Mbuti.DG	-0.014113	-18.897	5201	6171	68776
Russia_Afanasievo	China_AR_Xianbei_IA	Han_Liaoning	Mbuti.DG	-0.019209	-18.895	1991	2501	26547
Mongolia_EIA_2	China_Upper_YR_IA	Han_Liaoning	Mbuti.DG	-0.015431	-18.89	5593	6746	74741
China_Xinjian_IA.SG	Taiwan_Hanben_IA	Han_Liaoning	Mbuti.DG	-0.011497	-18.876	5741	6598	74575
Mongolia_EIA_Sagly_4	Taiwan_Gongguan	Han_Liaoning	Mbuti.DG	-0.013283	-18.869	5065	5949	66518
Russia_Afanasievo	Mongolia_LBA_MongunTaiga_3	Han_Liaoning	Mbuti.DG	-0.00822	-18.825	6957	7732	94280
China_Tianyuan	China_WLR_LN	Han_Liaoning	Mbuti.DG	-0.016386	-18.822	5410	6592	72133
Russia_Alan.SG	Russia_EarlyMedieval_Heshui_Mohe_1	Han_Liaoning	Mbuti.DG	-0.021596	-18.806	2157	2794	29485
Luxembourg_Loschbour.DG	China_Miaozigou_MN	Han_Liaoning	Mbuti.DG	-0.021786	-18.793	2218	2864	29622
Mongolia_Arkhangai_XiongnuEarlyMedieval_2	Mongolia_EIA_Xiongnu_7	Han_Liaoning	Mbuti.DG	-0.016063	-18.765	5204	6322	69625
China_Xinjian_IA.SG	China_Upper_YR_LN	Han_Liaoning	Mbuti.DG	-0.012652	-18.756	5592	6532	74287
Russia_Alan.SG	Vietnam_BA	Han_Liaoning	Mbuti.DG	-0.020496	-18.751	2429	3103	32863
Laos_Hoabinhian.SG	China_Upper_YR_LN	Han_Liaoning	Mbuti.DG	-0.017534	-18.737	3015	3734	41006
Iran_TepeAbdulHosein_N.SG	Mongolia_LBA_MongunTaiga_3	Han_Liaoning	Mbuti.DG	-0.01181	-18.72	6570	7613	88286
Russia_Samara_EBA_Yamnaya	Vietnam_BA	Han_Liaoning	Mbuti.DG	-0.019423	-18.677	2430	3068	32857
China_Tianyuan	Mongolia_EIA_SlabGrave_1	Han_Liaoning	Mbuti.DG	-0.013126	-18.654	6306	7398	83149
Mongolia_EIA_Pazyryk_6	China_AmurRiver_N	Han_Liaoning	Mbuti.DG	-0.013843	-18.639	5281	6253	70190
Russia_Kalmykia_EBA_Yamnaya.SG	Vietnam_BA	Han_Liaoning	Mbuti.DG	-0.020575	-18.626	2420	3092	32651
China_Tianyuan	China_AmurRiver_N	Han_Liaoning	Mbuti.DG	-0.01449	-18.617	5536	6601	73546
Mongolia_LBA_CenterWest_5	Mongolia_Khentii_Xiongnu	Han_Liaoning	Mbuti.DG	-0.014066	-18.587	6401	7596	85003
China_AmurRiver_Paleolithic	Mongolia_EIA_SlabGrave_1	Han_Liaoning	Mbuti.DG	-0.013266	-18.551	7067	8295	92614
Mongolia_EIA_2	Russia_MN_Boisman	Han_Liaoning	Mbuti.DG	-0.013735	-18.547	5636	6667	75047
Russia_Samara_EBA_Yamnaya	China_AR_Xianbei_IA	Han_Liaoning	Mbuti.DG	-0.020287	-18.535	1945	2475	26104
China_AmurRiver_Paleolithic	China_AmurRiver_N	Han_Liaoning	Mbuti.DG	-0.014563	-18.529	6004	7162	79516
China_AmurRiver_Paleolithic	China_WLR_MN	Han_Liaoning	Mbuti.DG	-0.01544	-18.529	6936	8369	92817
Russia_Andronovo.SG	Japan_Jomon.SG	Han_Liaoning	Mbuti.DG	-0.014059	-18.494	6274	7438	82836
Mongolia_EIA_2	Mongolia_EIA_SlabGrave_1	Han_Liaoning	Mbuti.DG	-0.012876	-18.479	5744	6731	76640
Russia_Andronovo.SG	China_Miaozigou_MN	Han_Liaoning	Mbuti.DG	-0.020975	-18.461	2304	2957	31147
Hungary_LateC_EBA_Baden_Yamnaya	Vietnam_BA	Han_Liaoning	Mbuti.DG	-0.021598	-18.406	2228	2889	30596
Russia_Samara_EBA_Yamnaya	China_AR_EN	Han_Liaoning	Mbuti.DG	-0.019302	-18.391	2497	3140	33272
Mongolia_LBA_MongunTaiga_3	China_AmurRiver_EarlyN	Han_Liaoning	Mbuti.DG	-0.01244	-18.379	5508	6415	72917
Mongolia_LBA_CenterWest_5	Mongolia_Tuv_Xiongnu	Han_Liaoning	Mbuti.DG	-0.013497	-18.367	6791	8013	90498
Russia_Andronovo.SG	China_AR_EN	Han_Liaoning	Mbuti.DG	-0.020263	-18.36	2529	3218	33961
Laos_Hoabinhian.SG	Taiwan_Hanben_IA	Han_Liaoning	Mbuti.DG	-0.016196	-18.313	3011	3676	41088
Mongolia_EIA_Pazyryk_6	China_WLR_LN	Han_Liaoning	Mbuti.DG	-0.015699	-18.297	5122	6192	68180
Russia_Alan.SG	Mongolia_Uvs_EIAXiongnuLateMedival	Han_Liaoning	Mbuti.DG	-0.007977	-18.292	7728	8550	103081
Mongolia_EIA_Sagly_4	Nepal_Chokhopani_2800BP.SG	Han_Liaoning	Mbuti.DG	-0.0112	-18.286	8035	9198	103821
Russia_Samara_EBA_Yamnaya	Russia_EarlyMedieval_Heshui_Mohe_1	Han_Liaoning	Mbuti.DG	-0.020794	-18.264	2192	2806	29537
Iran_Wezmeh_N.SG	Vietnam_BA	Han_Liaoning	Mbuti.DG	-0.023389	-18.254	2455	3228	33066
Iran_Hasanlu_IA.SG	China_Miaozigou_MN	Han_Liaoning	Mbuti.DG	-0.02461	-18.244	2020	2692	27339
China_Xinjian_IA.SG	China_NEastAsia_Coastal_EN	Han_Liaoning	Mbuti.DG	-0.012262	-18.234	5282	6132	69311
Russia_Kalmykia_EBA_Yamnaya.SG	Russia_EarlyMedieval_Heshui_Mohe_1	Han_Liaoning	Mbuti.DG	-0.021589	-18.22	2183	2816	29329
Russia_Alan.SG	Mongolia_LBA_MongunTaiga_3	Han_Liaoning	Mbuti.DG	-0.009366	-18.173	7017	7897	93920
Hungary_LateC_EBA_Baden_Yamnaya	China_AR_EN	Han_Liaoning	Mbuti.DG	-0.022339	-18.103	2108	2742	28408
Russia_Andronovo.SG	Vietnam_BA	Han_Liaoning	Mbuti.DG	-0.019503	-18.092	2442	3085	32993
Iran_TepeAbdulHosein_N.SG	China_AR_Xianbei_IA	Han_Liaoning	Mbuti.DG	-0.022612	-18.047	1849	2413	24964
Mongolia_EIA_Pazyryk_6	Mongolia_Tuv_LatEMedieval	Han_Liaoning	Mbuti.DG	-0.013656	-18.046	5612	6638	75128
Mongolia_EIA_Sagly_4	Nepal_Mebrak_2125BP.SG	Han_Liaoning	Mbuti.DG	-0.012826	-18.042	5273	6157	68944
China_Tianyuan	China_WLR_MN	Han_Liaoning	Mbuti.DG	-0.015209	-18.008	6259	7523	83103
Mongolia_EIA_2	China_WLR_LN	Han_Liaoning	Mbuti.DG	-0.016001	-17.998	4977	6047	66818
Mongolia_LBA_CenterWest_5	Mongolia_Bulgan_Xiongnu	Han_Liaoning	Mbuti.DG	-0.01227	-17.978	6740	7840	89646
Russia_Alan.SG	China_AR_Xianbei_IA	Han_Liaoning	Mbuti.DG	-0.020904	-17.957	1983	2541	26684
Mongolia_LBA_Khovsgol_6	China_YR_MN	Han_Liaoning	Mbuti.DG	-0.007266	-17.95	7981	8736	103935
Mongolia_EIA_Pazyryk_6	Mongolia_North_N	Han_Liaoning	Mbuti.DG	-0.012562	-17.948	5792	6767	77612
Mongolia_LBA_MongunTaiga_3	Mongolia_LBA_CenterWest_4	Han_Liaoning	Mbuti.DG	-0.008231	-17.907	7074	7840	93149
Mongolia_EIA_2	China_WLR_MN	Han_Liaoning	Mbuti.DG	-0.014935	-17.861	5729	6871	76446
China_Xinjian_IA.SG	China_Shimao_LN	Han_Liaoning	Mbuti.DG	-0.012795	-17.853	5596	6545	74139
Mongolia_LBA_CenterWest_5	Mongolia_LBA_CenterWest_4	Han_Liaoning	Mbuti.DG	-0.009966	-17.743	7279	8239	96412
Hungary_LateC_EBA_Baden_Yamnaya	Russia_EarlyMedieval_Heshui_Mohe_1	Han_Liaoning	Mbuti.DG	-0.022444	-17.739	2044	2668	27792
Mongolia_LBA_CenterWest_5	Nepal_Chokhopani_2800BP.SG	Han_Liaoning	Mbuti.DG	-0.01298	-17.703	7621	8902	98728
Hungary_LateC_EBA_Baden_Yamnaya	Mongolia_LBA_MongunTaiga_3	Han_Liaoning	Mbuti.DG	-0.010896	-17.692	5884	6755	79905
Iran_GanjDareh_N	Mongolia_Arkhangai_Xiongnu	Han_Liaoning	Mbuti.DG	-0.008267	-17.663	7321	8130	97864
Mongolia_EIA_2	Russia_DevilsCave_N.SG	Han_Liaoning	Mbuti.DG	-0.014418	-17.647	5810	6917	76801
Iran_Hasanlu_IA.SG	Japan_Jomon.SG	Han_Liaoning	Mbuti.DG	-0.016478	-17.629	5421	6611	72219
Hungary_LateC_EBA_Baden_Yamnaya	Mongolia_Uvs_EIAXiongnuLateMedival	Han_Liaoning	Mbuti.DG	-0.00946	-17.624	6141	6923	82579
Russia_Andronovo.SG	Mongolia_EIA_Sagly_4	Han_Liaoning	Mbuti.DG	-0.007917	-17.622	7678	8496	103343
Iran_GanjDareh_N	China_SEastAsia_Coastal_EN	Han_Liaoning	Mbuti.DG	-0.020385	-17.605	2319	2959	31423
Russia_Andronovo.SG	China_AR_Xianbei_IA	Han_Liaoning	Mbuti.DG	-0.020518	-17.59	1990	2539	26716
Mongolia_Uvs_EIAXiongnuLateMedival	Mongolia_EBA_Ulgii_1	Han_Liaoning	Mbuti.DG	-0.008589	-17.576	7192	8004	94627
Luxembourg_Loschbour.DG	Japan_Jomon.SG	Han_Liaoning	Mbuti.DG	-0.014725	-17.573	5957	7113	78503
China_Xinjian_IA.SG	China_Upper_YR_IA	Han_Liaoning	Mbuti.DG	-0.012831	-17.554	5454	6381	72191
Mongolia_Uvs_EIAXiongnuLateMedival	China_NEastAsia_Inland_EN	Han_Liaoning	Mbuti.DG	-0.012306	-17.534	6142	7141	81173
Mongolia_LBA_CenterWest_5	China_WLR_BA	Han_Liaoning	Mbuti.DG	-0.015407	-17.467	4126	4969	54691
Mongolia_LBA_CenterWest_5	China_SEastAsia_Coastal_LN	Han_Liaoning	Mbuti.DG	-0.013507	-17.467	4767	5616	62881
Mongolia_LBA_MongunTaiga_3	Mongolia_Tuv_Xiongnu	Han_Liaoning	Mbuti.DG	-0.011914	-17.408	6682	7726	87596
China_Tianyuan	Mongolia_North_N	Han_Liaoning	Mbuti.DG	-0.013018	-17.371	6236	7306	82218
Russia_Kalmykia_EBA_Yamnaya.SG	China_AR_Xianbei_IA	Han_Liaoning	Mbuti.DG	-0.020531	-17.363	1925	2459	26015
Mongolia_EIA_Pazyryk_6	China_AmurRiver_Mesolithic	Han_Liaoning	Mbuti.DG	-0.013439	-17.362	4707	5547	62528
Mongolia_LBA_CenterWest_5	Taiwan_Gongguan	Han_Liaoning	Mbuti.DG	-0.014779	-17.354	5025	5995	65662
Mongolia_Arkhangai_Xiongnu	China_Miaozigou_MN	Han_Liaoning	Mbuti.DG	-0.017211	-17.332	2264	2792	30627
Mongolia_LBA_Khovsgol_6	Taiwan_Hanben_IA	Han_Liaoning	Mbuti.DG	-0.005619	-17.299	8128	8714	104222
Iran_TepeAbdulHosein_N.SG	China_Xinjian_IA.SG	Han_Liaoning	Mbuti.DG	-0.013095	-17.277	5168	6081	69656
Mongolia_EIA_2	China_AmurRiver_N	Han_Liaoning	Mbuti.DG	-0.013678	-17.269	5214	6156	68858
China_AmurRiver_Paleolithic	Mongolia_North_N	Han_Liaoning	Mbuti.DG	-0.012987	-17.266	6937	8119	91031
Iran_Wezmeh_N.SG	Russia_EarlyMedieval_Heshui_Mohe_1	Han_Liaoning	Mbuti.DG	-0.023229	-17.259	2167	2856	29684
China_Tianyuan	Mongolia_Tuv_LatEMedieval	Han_Liaoning	Mbuti.DG	-0.013836	-17.232	5976	7068	78914
Laos_Hoabinhian.SG	China_Upper_YR_IA	Han_Liaoning	Mbuti.DG	-0.017372	-17.228	2929	3618	39666
Mongolia_EIA_Pazyryk_6	Russia_Buryatia_Xiongnu	Han_Liaoning	Mbuti.DG	-0.012285	-17.222	5857	6808	77454
Mongolia_EIA_2	Mongolia_Tuv_LatEMedieval	Han_Liaoning	Mbuti.DG	-0.013657	-17.21	5517	6525	73750
Russia_Andronovo.SG	Russia_EarlyMedieval_Heshui_Mohe_1	Han_Liaoning	Mbuti.DG	-0.020445	-17.183	2206	2812	29640
Russia_Caucasus_EBA_Yamnaya	China_Miaozigou_MN	Han_Liaoning	Mbuti.DG	-0.022677	-17.181	1663	2182	22861
Mongolia_LBA_Khovsgol_6	China_Upper_YR_LN	Han_Liaoning	Mbuti.DG	-0.006872	-17.175	7924	8635	103500
Mongolia_LBA_CenterWest_5	Mongolia_LBA_Khovsgol_6	Han_Liaoning	Mbuti.DG	-0.008853	-17.138	7450	8319	98164
Mongolia_EIA_Pazyryk_6	Mongolia_East_N	Han_Liaoning	Mbuti.DG	-0.013188	-17.106	5662	6653	75127
China_Xinjian_IA.SG	Mongolia_EIA_SlabGrave_1	Han_Liaoning	Mbuti.DG	-0.010101	-17.098	5560	6296	72854
Iran_GanjDareh_N	Mongolia_LBA_CenterWest_5	Han_Liaoning	Mbuti.DG	-0.01021	-17.095	7089	8059	94990
Iran_Wezmeh_N.SG	Mongolia_LBA_MongunTaiga_3	Han_Liaoning	Mbuti.DG	-0.011497	-17.059	7087	8174	94506
Luxembourg_Loschbour.DG	China_AR_EN	Han_Liaoning	Mbuti.DG	-0.019902	-17.046	2396	3039	32337
Mongolia_EIA_2	Mongolia_East_N	Han_Liaoning	Mbuti.DG	-0.013408	-17.012	5505	6496	73847
Laos_Hoabinhian.SG	China_Shimao_LN	Han_Liaoning	Mbuti.DG	-0.017312	-16.997	3002	3710	40893
Mongolia_EIA_Sagly_4	China_NEastAsia_Inland_EN	Han_Liaoning	Mbuti.DG	-0.011358	-16.983	6150	7073	81297
Russia_MLBA_Sintashta	China_Xinjian_IA.SG	Han_Liaoning	Mbuti.DG	-0.010041	-16.969	5554	6298	74067
Mongolia_LBA_MongunTaiga_3	Mongolia_Khentii_Xiongnu	Han_Liaoning	Mbuti.DG	-0.012128	-16.963	6292	7301	83198
China_AmurRiver_Paleolithic	Mongolia_Tuv_LatEMedieval	Han_Liaoning	Mbuti.DG	-0.013695	-16.962	6591	7779	86701
Mongolia_EIA_Pazyryk_6	Nepal_Samdzong_1500BP.SG	Han_Liaoning	Mbuti.DG	-0.012755	-16.948	5986	6987	78471
Ukraine_EBA_Yamnaya	China_Miaozigou_MN	Han_Liaoning	Mbuti.DG	-0.022988	-16.914	1760	2314	24067
Iran_GanjDareh_N	Vietnam_N	Han_Liaoning	Mbuti.DG	-0.019298	-16.906	1844	2321	24700
Russia_Kalmykia_EBA_Yamnaya.SG	Mongolia_LBA_MongunTaiga_3	Han_Liaoning	Mbuti.DG	-0.008738	-16.895	6795	7600	92129
Mongolia_EIA_Pazyryk_6	China_AmurRiver_EarlyN	Han_Liaoning	Mbuti.DG	-0.014119	-16.885	4926	5851	65470
Mongolia_LBA_MongunTaiga_3	Mongolia_Bulgan_Xiongnu	Han_Liaoning	Mbuti.DG	-0.010417	-16.884	6637	7544	87089
Mongolia_LBA_MongunTaiga_3	China_AmurRiver_LPaleolithic	Han_Liaoning	Mbuti.DG	-0.010833	-16.869	6206	7075	80288
Iran_TepeAbdulHosein_N.SG	China_SEastAsia_Coastal_EN	Han_Liaoning	Mbuti.DG	-0.020723	-16.845	2202	2824	30043
China_AmurRiver_Paleolithic	Mongolia_East_N	Han_Liaoning	Mbuti.DG	-0.013712	-16.836	6568	7753	86463
Russia_MLBA_Sintashta	China_SEastAsia_Coastal_EN	Han_Liaoning	Mbuti.DG	-0.017606	-16.789	2354	2910	31577
China_Tianyuan	Mongolia_East_N	Han_Liaoning	Mbuti.DG	-0.013702	-16.78	5978	7055	78587
Iran_Hasanlu_IA.SG	Vietnam_BA	Han_Liaoning	Mbuti.DG	-0.021891	-16.769	2197	2844	29578
China_Tianyuan	China_AmurRiver_EarlyN	Han_Liaoning	Mbuti.DG	-0.01517	-16.754	5146	6180	68152
Mongolia_LBA_CenterWest_5	Nepal_Mebrak_2125BP.SG	Han_Liaoning	Mbuti.DG	-0.014564	-16.747	5023	5983	65910
Iran_Wezmeh_N.SG	China_AR_Xianbei_IA	Han_Liaoning	Mbuti.DG	-0.021655	-16.746	1983	2564	26847
China_AmurRiver_Paleolithic	China_AmurRiver_EarlyN	Han_Liaoning	Mbuti.DG	-0.014968	-16.744	5490	6582	72931
Mongolia_EIA_Sagly_4	Mongolia_EBA_Ulgii_1	Han_Liaoning	Mbuti.DG	-0.007484	-16.726	7230	7940	94866
China_AmurRiver_Paleolithic	Nepal_Samdzong_1500BP.SG	Han_Liaoning	Mbuti.DG	-0.013013	-16.677	7141	8355	93347
Iran_Hasanlu_IA.SG	Mongolia_EIA_Sagly_4	Han_Liaoning	Mbuti.DG	-0.010042	-16.667	6744	7647	89931
China_Xinjian_IA.SG	China_WLR_MN	Han_Liaoning	Mbuti.DG	-0.011726	-16.657	5628	6502	74493
Mongolia_EIA_2	Russia_Buryatia_Xiongnu	Han_Liaoning	Mbuti.DG	-0.012318	-16.651	5715	6650	75898
Mongolia_EIA_2	Mongolia_North_N	Han_Liaoning	Mbuti.DG	-0.012482	-16.641	5734	6683	76078
China_Tianyuan	Mongolia_Khentii_Xiongnu	Han_Liaoning	Mbuti.DG	-0.014197	-16.629	5627	6697	75344
Mongolia_LBA_MongunTaiga_3	Nepal_Mebrak_2125BP.SG	Han_Liaoning	Mbuti.DG	-0.013082	-16.568	4859	5689	63443
China_AmurRiver_Paleolithic	Russia_Buryatia_Xiongnu	Han_Liaoning	Mbuti.DG	-0.012676	-16.563	6966	8119	90943
Russia_Samara_EBA_Yamnaya	Mongolia_LBA_MongunTaiga_3	Han_Liaoning	Mbuti.DG	-0.008107	-16.544	6896	7650	93005
China_Xinjian_IA.SG	Russia_DevilsCave_N.SG	Han_Liaoning	Mbuti.DG	-0.01165	-16.525	5698	6572	74996
Russia_Kalmykia_EBA_Yamnaya.SG	Mongolia_Uvs_EIAXiongnuLateMedival	Han_Liaoning	Mbuti.DG	-0.007526	-16.511	7413	8165	99980
Mongolia_LBA_MongunTaiga_3	China_SEastAsia_Coastal_LN	Han_Liaoning	Mbuti.DG	-0.011188	-16.499	4763	5459	62164
China_Tianyuan	Russia_Buryatia_Xiongnu	Han_Liaoning	Mbuti.DG	-0.012635	-16.474	6289	7325	82022
Laos_Hoabinhian.SG	China_NEastAsia_Coastal_EN	Han_Liaoning	Mbuti.DG	-0.016715	-16.466	2768	3397	37617
China_AmurRiver_Paleolithic	Mongolia_Tuv_Xiongnu	Han_Liaoning	Mbuti.DG	-0.014018	-16.428	6597	7809	86481
Mongolia_Uvs_EIAXiongnuLateMedival	Mongolia_EIA_Xiongnu_7	Han_Liaoning	Mbuti.DG	-0.011183	-16.383	5838	6702	77184
China_Xinjian_IA.SG	Russia_MN_Boisman	Han_Liaoning	Mbuti.DG	-0.011175	-16.358	5146	5901	67590
Russia_Caucasus_EBA_Yamnaya	Mongolia_EIA_Sagly_4	Han_Liaoning	Mbuti.DG	-0.008546	-16.3	5348	5966	72258
Russia_Caucasus_EBA_Yamnaya	Japan_Jomon.SG	Han_Liaoning	Mbuti.DG	-0.014909	-16.26	4351	5204	57214
China_AmurRiver_Paleolithic	China_AmurRiver_Mesolithic	Han_Liaoning	Mbuti.DG	-0.013765	-16.255	5196	6148	69166
Laos_Hoabinhian.SG	Russia_DevilsCave_N.SG	Han_Liaoning	Mbuti.DG	-0.016353	-16.217	3064	3740	41392
Mongolia_LBA_MongunTaiga_3	Taiwan_Gongguan	Han_Liaoning	Mbuti.DG	-0.012883	-16.202	4939	5778	65124
Iran_Hasanlu_IA.SG	China_AR_EN	Han_Liaoning	Mbuti.DG	-0.022024	-16.195	2249	2907	29864
Mongolia_LBA_MongunTaiga_3	China_WLR_BA	Han_Liaoning	Mbuti.DG	-0.013324	-16.19	4011	4719	53097
Mongolia_EIA_2	Nepal_Samdzong_1500BP.SG	Han_Liaoning	Mbuti.DG	-0.012811	-16.189	5850	6833	76800
Mongolia_EIA_Pazyryk_6	Mongolia_Khentii_Xiongnu	Han_Liaoning	Mbuti.DG	-0.013894	-16.183	5385	6391	72409
China_AmurRiver_Paleolithic	Mongolia_Khentii_Xiongnu	Han_Liaoning	Mbuti.DG	-0.014301	-16.157	6154	7331	82303
China_AmurRiver_Paleolithic	Taiwan_Gongguan	Han_Liaoning	Mbuti.DG	-0.015466	-16.125	4804	5802	64479
Laos_Hoabinhian.SG	China_WLR_LN	Han_Liaoning	Mbuti.DG	-0.018211	-16.117	2505	3131	34364
Mongolia_EIA_Sagly_4	Mongolia_EIA_Xiongnu_7	Han_Liaoning	Mbuti.DG	-0.010455	-16.11	5835	6643	77329
China_Tianyuan	China_AmurRiver_Mesolithic	Han_Liaoning	Mbuti.DG	-0.014436	-16.109	4902	5839	64903
Laos_Hoabinhian.SG	Russia_MN_Boisman	Han_Liaoning	Mbuti.DG	-0.015896	-16.1	2711	3290	36446
Luxembourg_Loschbour.DG	Russia_EarlyMedieval_Heshui_Mohe_1	Han_Liaoning	Mbuti.DG	-0.020075	-16.086	2092	2657	28171
China_Tianyuan	Nepal_Samdzong_1500BP.SG	Han_Liaoning	Mbuti.DG	-0.012914	-16.077	6405	7484	83515
China_Xinjian_IA.SG	China_WLR_LN	Han_Liaoning	Mbuti.DG	-0.013205	-16.069	4733	5559	62530
Mongolia_LBA_MongunTaiga_3	Mongolia_LBA_Khovsgol_6	Han_Liaoning	Mbuti.DG	-0.007095	-16.068	7207	7875	94160
Russia_Samara_EBA_Yamnaya	Mongolia_Uvs_EIAXiongnuLateMedival	Han_Liaoning	Mbuti.DG	-0.006556	-16.067	7511	8171	100639
Iran_Wezmeh_N.SG	Mongolia_Uvs_EIAXiongnuLateMedival	Han_Liaoning	Mbuti.DG	-0.010296	-16.035	7862	8930	103733
Mongolia_EIA_2	China_AmurRiver_Mesolithic	Han_Liaoning	Mbuti.DG	-0.013406	-15.98	4666	5490	61452
Russia_Caucasus_EBA_Yamnaya	Vietnam_BA	Han_Liaoning	Mbuti.DG	-0.019936	-15.973	2127	2699	28714
Iran_Hasanlu_IA.SG	China_AR_Xianbei_IA	Han_Liaoning	Mbuti.DG	-0.020955	-15.887	1752	2243	23456
Laos_Hoabinhian.SG	China_WLR_MN	Han_Liaoning	Mbuti.DG	-0.016654	-15.873	3032	3717	41125
Russia_Caucasus_EBA_Yamnaya	Russia_EarlyMedieval_Heshui_Mohe_1	Han_Liaoning	Mbuti.DG	-0.020543	-15.868	1909	2441	25876
Iran_Wezmeh_N.SG	China_Xinjian_IA.SG	Han_Liaoning	Mbuti.DG	-0.012783	-15.855	5641	6600	74968
Mongolia_LBA_CenterWest_5	China_NEastAsia_Inland_EN	Han_Liaoning	Mbuti.DG	-0.012696	-15.845	6031	7041	79553
China_Tianyuan	Taiwan_Gongguan	Han_Liaoning	Mbuti.DG	-0.015643	-15.839	4554	5499	60392
Mongolia_Arkhangai_Xiongnu	Vietnam_BA	Han_Liaoning	Mbuti.DG	-0.015405	-15.821	2479	2987	32948
Laos_Hoabinhian.SG	Mongolia_EIA_SlabGrave_1	Han_Liaoning	Mbuti.DG	-0.014297	-15.814	2997	3567	39895
Mongolia_EIA_Pazyryk_6	China_AmurRiver_LPaleolithic	Han_Liaoning	Mbuti.DG	-0.012518	-15.778	5347	6226	70241
Mongolia_LBA_CenterWest_4	China_YR_LN	Han_Liaoning	Mbuti.DG	-0.005794	-15.777	7826	8413	101229
Mongolia_EIA_2	China_AmurRiver_EarlyN	Han_Liaoning	Mbuti.DG	-0.014183	-15.737	4838	5750	64306
Hungary_LateC_EBA_Baden_Yamnaya	China_AR_Xianbei_IA	Han_Liaoning	Mbuti.DG	-0.021067	-15.725	1669	2132	21965
Luxembourg_Loschbour.DG	Vietnam_BA	Han_Liaoning	Mbuti.DG	-0.018376	-15.714	2363	2941	31460
Mongolia_LBA_MongunTaiga_3	Nepal_Chokhopani_2800BP.SG	Han_Liaoning	Mbuti.DG	-0.01119	-15.713	7293	8349	94355
Mongolia_EIA_Pazyryk_6	Mongolia_Tuv_Xiongnu	Han_Liaoning	Mbuti.DG	-0.013129	-15.71	5600	6578	74480
China_AmurRiver_Paleolithic	China_AmurRiver_LPaleolithic	Han_Liaoning	Mbuti.DG	-0.012982	-15.709	6105	7147	80259
Mongolia_Uvs_EIAXiongnuLateMedival	China_Miaozigou_MN	Han_Liaoning	Mbuti.DG	-0.015294	-15.705	2301	2772	30765
China_AmurRiver_Paleolithic	China_WLR_BA	Han_Liaoning	Mbuti.DG	-0.015471	-15.7	3955	4766	52407
Ukraine_EBA_Yamnaya	Russia_EarlyMedieval_Heshui_Mohe_1	Han_Liaoning	Mbuti.DG	-0.022559	-15.693	1961	2572	27067
Russia_Afanasievo	China_SEastAsia_Coastal_EN	Han_Liaoning	Mbuti.DG	-0.016545	-15.688	2375	2897	31578
Hungary_LateC_EBA_Baden_Yamnaya	China_SEastAsia_Coastal_EN	Han_Liaoning	Mbuti.DG	-0.019496	-15.685	2209	2791	29858
Iran_Wezmeh_N.SG	China_SEastAsia_Coastal_EN	Han_Liaoning	Mbuti.DG	-0.020661	-15.68	2341	2994	31594
Luxembourg_Loschbour.DG	Mongolia_EIA_Sagly_4	Han_Liaoning	Mbuti.DG	-0.008209	-15.669	7351	8155	97960
Ukraine_EBA_Yamnaya	Vietnam_BA	Han_Liaoning	Mbuti.DG	-0.020993	-15.646	2189	2812	29685
China_Tianyuan	Mongolia_Tuv_Xiongnu	Han_Liaoning	Mbuti.DG	-0.013772	-15.601	5989	7069	78438
China_Tianyuan	China_AmurRiver_LPaleolithic	Han_Liaoning	Mbuti.DG	-0.012963	-15.597	5638	6599	74130
Russia_Afanasievo	China_Xinjian_IA.SG	Han_Liaoning	Mbuti.DG	-0.009218	-15.589	5545	6225	73772
Mongolia_EIA_Pazyryk_6	Nepal_Mebrak_2125BP.SG	Han_Liaoning	Mbuti.DG	-0.01554	-15.545	4039	4869	53372
Russia_Caucasus_EBA_Yamnaya	China_AR_EN	Han_Liaoning	Mbuti.DG	-0.020053	-15.504	1913	2424	25464
Mongolia_Arkhangai_Xiongnu	China_AR_EN	Han_Liaoning	Mbuti.DG	-0.015673	-15.455	2510	3035	33478
Ukraine_EBA_Yamnaya	Japan_Jomon.SG	Han_Liaoning	Mbuti.DG	-0.015139	-15.377	4620	5539	60703
Laos_Hoabinhian.SG	China_AmurRiver_N	Han_Liaoning	Mbuti.DG	-0.016789	-15.365	2266	2783	30802
Mongolia_LBA_Khovsgol_6	China_NEastAsia_Coastal_EN	Han_Liaoning	Mbuti.DG	-0.006225	-15.347	7456	8063	97482
Iran_TepeAbdulHosein_N.SG	Vietnam_N	Han_Liaoning	Mbuti.DG	-0.019555	-15.315	1746	2211	23757
Luxembourg_Loschbour.DG	China_AR_Xianbei_IA	Han_Liaoning	Mbuti.DG	-0.019244	-15.292	1908	2397	25384
Mongolia_Arkhangai_XiongnuEarlyMedieval_2	Vietnam_BA	Han_Liaoning	Mbuti.DG	-0.018038	-15.271	2251	2802	30546
Mongolia_LBA_Khovsgol_6	China_Shimao_LN	Han_Liaoning	Mbuti.DG	-0.006968	-15.262	7918	8638	103325
Mongolia_Arkhangai_XiongnuEarlyMedieval_2	China_Miaozigou_MN	Han_Liaoning	Mbuti.DG	-0.019562	-15.241	1945	2455	26041
Laos_Hoabinhian.SG	Mongolia_East_N	Han_Liaoning	Mbuti.DG	-0.016024	-15.223	2617	3184	35393
China_AmurRiver_Paleolithic	Nepal_Chokhopani_2800BP.SG	Han_Liaoning	Mbuti.DG	-0.013296	-15.206	7151	8390	93172
Mongolia_EIA_Pazyryk_6	China_SEastAsia_Coastal_LN	Han_Liaoning	Mbuti.DG	-0.013598	-15.194	4232	4996	56238
China_Tianyuan	Mongolia_Bulgan_Xiongnu	Han_Liaoning	Mbuti.DG	-0.012421	-15.18	5968	6939	78130
China_Tianyuan	China_SEastAsia_Coastal_LN	Han_Liaoning	Mbuti.DG	-0.013764	-15.173	4404	5210	58529
Mongolia_EIA_2	Mongolia_Bulgan_Xiongnu	Han_Liaoning	Mbuti.DG	-0.012367	-15.172	5461	6363	72942
Laos_Hoabinhian.SG	Nepal_Samdzong_1500BP.SG	Han_Liaoning	Mbuti.DG	-0.014514	-15.14	3069	3670	41396
China_Xinjian_IA.SG	Mongolia_North_N	Han_Liaoning	Mbuti.DG	-0.009818	-15.138	5384	6073	70164
Mongolia_EIA_2	Mongolia_Khentii_Xiongnu	Han_Liaoning	Mbuti.DG	-0.013777	-15.107	5312	6291	71074
Mongolia_LBA_CenterWest_5	Mongolia_EIA_Xiongnu_7	Han_Liaoning	Mbuti.DG	-0.011785	-15.086	5730	6628	76169
Iran_Hasanlu_IA.SG	Russia_EarlyMedieval_Heshui_Mohe_1	Han_Liaoning	Mbuti.DG	-0.020762	-15.034	1948	2498	26491
Mongolia_EIA_Pazyryk_6	Mongolia_LBA_CenterWest_4	Han_Liaoning	Mbuti.DG	-0.00982	-15.033	5876	6642	77951
China_Xinjian_IA.SG	Mongolia_Tuv_LatEMedieval	Han_Liaoning	Mbuti.DG	-0.010895	-15.015	5013	5735	66234
China_Tianyuan	Nepal_Chokhopani_2800BP.SG	Han_Liaoning	Mbuti.DG	-0.013281	-15.014	6385	7492	83355
Laos_Hoabinhian.SG	Mongolia_North_N	Han_Liaoning	Mbuti.DG	-0.014141	-14.996	2836	3375	38090
Mongolia_EIA_Pazyryk_6	Mongolia_Bulgan_Xiongnu	Han_Liaoning	Mbuti.DG	-0.012148	-14.993	5631	6534	74336
Mongolia_EBA_Ulgii_1	China_YR_LN	Han_Liaoning	Mbuti.DG	-0.00679	-14.991	7339	7987	95347
Iran_GanjDareh_N	Mongolia_EIA_Pazyryk_6	Han_Liaoning	Mbuti.DG	-0.010757	-14.969	5785	6617	77384
Ukraine_EBA_Yamnaya	China_AR_EN	Han_Liaoning	Mbuti.DG	-0.020594	-14.963	1992	2541	26668
Russia_Samara_EBA_Yamnaya	China_SEastAsia_Coastal_EN	Han_Liaoning	Mbuti.DG	-0.017101	-14.963	2352	2891	31489
China_AmurRiver_Paleolithic	China_SEastAsia_Coastal_LN	Han_Liaoning	Mbuti.DG	-0.013662	-14.948	4687	5538	62316
Mongolia_EIA_Sagly_4	China_Miaozigou_MN	Han_Liaoning	Mbuti.DG	-0.013723	-14.942	2325	2749	30864
Russia_Andronovo.SG	Mongolia_LBA_MongunTaiga_3	Han_Liaoning	Mbuti.DG	-0.00801	-14.942	6984	7738	94143
China_AmurRiver_Paleolithic	Mongolia_Bulgan_Xiongnu	Han_Liaoning	Mbuti.DG	-0.012484	-14.934	6590	7663	85986
Mongolia_LBA_Khovsgol_6	China_Upper_YR_IA	Han_Liaoning	Mbuti.DG	-0.006845	-14.933	7733	8422	100697
Russia_MLBA_Sintashta	Vietnam_N	Han_Liaoning	Mbuti.DG	-0.015201	-14.916	1895	2272	24827
Russia_Kalmykia_EBA_Yamnaya.SG	China_SEastAsia_Coastal_EN	Han_Liaoning	Mbuti.DG	-0.017726	-14.911	2371	2925	31265
Mongolia_LBA_MongunTaiga_3	China_NEastAsia_Inland_EN	Han_Liaoning	Mbuti.DG	-0.011297	-14.9	5933	6819	78426
Mongolia_LBA_CenterWest_4	China_YR_LBIA	Han_Liaoning	Mbuti.DG	-0.005923	-14.843	7750	8347	100747
Mongolia_EIA_2	China_AmurRiver_LPaleolithic	Han_Liaoning	Mbuti.DG	-0.012592	-14.831	5331	6203	69181
China_AmurRiver_Paleolithic	Nepal_Mebrak_2125BP.SG	Han_Liaoning	Mbuti.DG	-0.014465	-14.817	4732	5637	62554
Mongolia_EIA_Pazyryk_6	Taiwan_Gongguan	Han_Liaoning	Mbuti.DG	-0.014323	-14.803	4501	5351	59290
Mongolia_Arkhangai_Xiongnu	Russia_EarlyMedieval_Heshui_Mohe_1	Han_Liaoning	Mbuti.DG	-0.015872	-14.769	2224	2695	29631
Mongolia_EIA_2	Nepal_Chokhopani_2800BP.SG	Han_Liaoning	Mbuti.DG	-0.013226	-14.761	5861	6875	76636
Mongolia_EIA_2	China_WLR_BA	Han_Liaoning	Mbuti.DG	-0.015338	-14.755	3314	3995	44372
Russia_Alan.SG	China_SEastAsia_Coastal_EN	Han_Liaoning	Mbuti.DG	-0.017581	-14.734	2363	2915	31400
China_Xinjian_IA.SG	Mongolia_East_N	Han_Liaoning	Mbuti.DG	-0.010631	-14.71	5003	5703	65784
Russia_Kalmykia_EBA_Yamnaya.SG	China_Xinjian_IA.SG	Han_Liaoning	Mbuti.DG	-0.009974	-14.697	5341	6059	72024
Mongolia_EIA_Pazyryk_6	Nepal_Chokhopani_2800BP.SG	Han_Liaoning	Mbuti.DG	-0.01303	-14.683	6047	7067	78315
China_Xinjian_IA.SG	Nepal_Samdzong_1500BP.SG	Han_Liaoning	Mbuti.DG	-0.009571	-14.632	5772	6490	74983
Mongolia_EIA_2	China_SEastAsia_Coastal_LN	Han_Liaoning	Mbuti.DG	-0.013397	-14.626	4215	4960	55646
Mongolia_EIA_2	Mongolia_Tuv_Xiongnu	Han_Liaoning	Mbuti.DG	-0.013338	-14.605	5511	6485	73015
Russia_Alan.SG	China_Xinjian_IA.SG	Han_Liaoning	Mbuti.DG	-0.009935	-14.59	5627	6368	74540
Hungary_LateC_EBA_Baden_Yamnaya	China_Xinjian_IA.SG	Han_Liaoning	Mbuti.DG	-0.011894	-14.573	4418	5118	58893
Mongolia_LBA_Khovsgol_6	Mongolia_EIA_SlabGrave_1	Han_Liaoning	Mbuti.DG	-0.003996	-14.566	7755	8164	102259
Iran_Hasanlu_IA.SG	Mongolia_LBA_MongunTaiga_3	Han_Liaoning	Mbuti.DG	-0.010289	-14.527	6148	6996	82466
Ukraine_EBA_Yamnaya	China_AR_Xianbei_IA	Han_Liaoning	Mbuti.DG	-0.022105	-14.515	1536	1990	20552
Mongolia_EIA_2	Taiwan_Gongguan	Han_Liaoning	Mbuti.DG	-0.014338	-14.513	4435	5273	58475
Russia_Caucasus_EBA_Yamnaya	China_AR_Xianbei_IA	Han_Liaoning	Mbuti.DG	-0.020143	-14.494	1443	1834	19449
Iran_GanjDareh_N	Mongolia_EIA_2	Han_Liaoning	Mbuti.DG	-0.010625	-14.454	5638	6444	75868
Mongolia_LBA_CenterWest_5	China_Miaozigou_MN	Han_Liaoning	Mbuti.DG	-0.015917	-14.446	2219	2691	29655
China_AmurRiver_Paleolithic	Mongolia_LBA_CenterWest_4	Han_Liaoning	Mbuti.DG	-0.010347	-14.436	7139	8089	91766
Russia_Samara_EBA_Yamnaya	China_Xinjian_IA.SG	Han_Liaoning	Mbuti.DG	-0.009257	-14.434	5411	6079	72191
China_Xinjian_IA.SG	Russia_Buryatia_Xiongnu	Han_Liaoning	Mbuti.DG	-0.009397	-14.362	5410	6076	70967
Mongolia_Arkhangai_Xiongnu	China_AR_Xianbei_IA	Han_Liaoning	Mbuti.DG	-0.015382	-14.356	1977	2381	26265
Mongolia_Arkhangai_XiongnuEarlyMedieval_2	China_AR_EN	Han_Liaoning	Mbuti.DG	-0.017773	-14.321	2131	2641	28669
Mongolia_EBA_Ulgii_1	China_YR_LBIA	Han_Liaoning	Mbuti.DG	-0.006924	-14.318	7261	7919	94960
Mongolia_Arkhangai_XiongnuEarlyMedieval_2	Russia_EarlyMedieval_Heshui_Mohe_1	Han_Liaoning	Mbuti.DG	-0.017894	-14.311	2058	2553	27645
Mongolia_EIA_2	Nepal_Mebrak_2125BP.SG	Han_Liaoning	Mbuti.DG	-0.014873	-14.308	3985	4763	52265
China_Xinjian_IA.SG	China_AmurRiver_N	Han_Liaoning	Mbuti.DG	-0.010838	-14.296	4513	5151	58789
Mongolia_LBA_Khovsgol_6	Russia_MN_Boisman	Han_Liaoning	Mbuti.DG	-0.005226	-14.25	7264	7761	95266
Mongolia_EIA_Pazyryk_6	Mongolia_LBA_Khovsgol_6	Han_Liaoning	Mbuti.DG	-0.009032	-14.229	5909	6616	78356
Laos_Hoabinhian.SG	Russia_Buryatia_Xiongnu	Han_Liaoning	Mbuti.DG	-0.013841	-14.225	2916	3452	38723
Russia_Afanasievo	Vietnam_N	Han_Liaoning	Mbuti.DG	-0.014753	-14.187	1906	2272	24828
China_Tianyuan	China_NEastAsia_Inland_EN	Han_Liaoning	Mbuti.DG	-0.013057	-14.171	5462	6411	72621
Mongolia_EIA_Pazyryk_6	China_WLR_BA	Han_Liaoning	Mbuti.DG	-0.014797	-14.168	3415	4085	45266
Russia_Andronovo.SG	Mongolia_Uvs_EIAXiongnuLateMedival	Han_Liaoning	Mbuti.DG	-0.00674	-14.153	7681	8376	103097
Mongolia_EIA_2	Mongolia_LBA_CenterWest_4	Han_Liaoning	Mbuti.DG	-0.009781	-14.135	5749	6496	76416
Mongolia_LBA_Khovsgol_6	China_WLR_LN	Han_Liaoning	Mbuti.DG	-0.007453	-14.104	6643	7291	86904
Laos_Hoabinhian.SG	Mongolia_Tuv_LatEMedieval	Han_Liaoning	Mbuti.DG	-0.014806	-14.077	2686	3216	35800
Russia_Kalmykia_EBA_Yamnaya.SG	Vietnam_N	Han_Liaoning	Mbuti.DG	-0.015832	-14.064	1879	2269	24589
China_Tianyuan	China_WLR_BA	Han_Liaoning	Mbuti.DG	-0.014754	-14.034	3595	4301	47852
China_AmurRiver_Paleolithic	China_NEastAsia_Inland_EN	Han_Liaoning	Mbuti.DG	-0.013015	-14.034	5908	6923	78008
Russia_Samara_EBA_Yamnaya	Vietnam_N	Han_Liaoning	Mbuti.DG	-0.015499	-14.026	1879	2262	24697
Ukraine_EBA_Yamnaya	Mongolia_EIA_Sagly_4	Han_Liaoning	Mbuti.DG	-0.008746	-14.008	5656	6329	76975
Mongolia_LBA_CenterWest_5	Mongolia_EBA_Ulgii_1	Han_Liaoning	Mbuti.DG	-0.009015	-14	7032	7862	92051
Mongolia_Arkhangai_Xiongnu	Japan_Jomon.SG	Han_Liaoning	Mbuti.DG	-0.009987	-13.978	6272	7080	80881
Iran_TepeAbdulHosein_N.SG	Mongolia_LBA_CenterWest_5	Han_Liaoning	Mbuti.DG	-0.009938	-13.971	6880	7795	91990
Iran_TepeAbdulHosein_N.SG	Mongolia_Arkhangai_Xiongnu	Han_Liaoning	Mbuti.DG	-0.007772	-13.926	7167	7910	95690
China_Tianyuan	Mongolia_LBA_CenterWest_4	Han_Liaoning	Mbuti.DG	-0.010245	-13.905	6385	7231	82651
China_Tianyuan	Nepal_Mebrak_2125BP.SG	Han_Liaoning	Mbuti.DG	-0.014379	-13.881	4302	5115	56553
China_Xinjian_IA.SG	China_AmurRiver_Mesolithic	Han_Liaoning	Mbuti.DG	-0.011106	-13.873	3871	4430	50306
Russia_MLBA_Sintashta	Mongolia_LBA_CenterWest_5	Han_Liaoning	Mbuti.DG	-0.007086	-13.852	7287	7985	98494
Luxembourg_Loschbour.DG	Mongolia_LBA_MongunTaiga_3	Han_Liaoning	Mbuti.DG	-0.008237	-13.846	6681	7418	89417
Russia_Andronovo.SG	China_SEastAsia_Coastal_EN	Han_Liaoning	Mbuti.DG	-0.016907	-13.765	2399	2932	31560
Laos_Hoabinhian.SG	Mongolia_Tuv_Xiongnu	Han_Liaoning	Mbuti.DG	-0.015218	-13.715	2663	3216	36327
Mongolia_LBA_MongunTaiga_3	Mongolia_EIA_Xiongnu_7	Han_Liaoning	Mbuti.DG	-0.009921	-13.661	5731	6479	75331
Mongolia_EIA_2	China_NEastAsia_Inland_EN	Han_Liaoning	Mbuti.DG	-0.012946	-13.655	5118	5999	67988
Iran_Wezmeh_N.SG	Mongolia_LBA_CenterWest_5	Han_Liaoning	Mbuti.DG	-0.009862	-13.607	7477	8452	98880
Mongolia_LBA_CenterWest_4	China_YR_MN	Han_Liaoning	Mbuti.DG	-0.005993	-13.571	7787	8390	100717
Russia_Alan.SG	Vietnam_N	Han_Liaoning	Mbuti.DG	-0.015518	-13.569	1900	2283	24699
Mongolia_EIA_Pazyryk_6	China_NEastAsia_Inland_EN	Han_Liaoning	Mbuti.DG	-0.012574	-13.487	5195	6067	69330
Iran_Hasanlu_IA.SG	Mongolia_Uvs_EIAXiongnuLateMedival	Han_Liaoning	Mbuti.DG	-0.008782	-13.484	6768	7556	89732
Mongolia_LBA_Khovsgol_6	China_AmurRiver_N	Han_Liaoning	Mbuti.DG	-0.005309	-13.483	6297	6736	82677
Mongolia_EIA_Pazyryk_6	Mongolia_EIA_Xiongnu_7	Han_Liaoning	Mbuti.DG	-0.011758	-13.481	5108	5903	67656
Mongolia_Arkhangai_XiongnuEarlyMedieval_2	China_AR_Xianbei_IA	Han_Liaoning	Mbuti.DG	-0.017504	-13.474	1673	2062	22202
Russia_Caucasus_EBA_Yamnaya	Mongolia_LBA_MongunTaiga_3	Han_Liaoning	Mbuti.DG	-0.008536	-13.474	5204	5806	70461
Hungary_LateC_EBA_Baden_Yamnaya	Mongolia_LBA_CenterWest_5	Han_Liaoning	Mbuti.DG	-0.008805	-13.465	6045	6759	81076
Iran_Wezmeh_N.SG	Vietnam_N	Han_Liaoning	Mbuti.DG	-0.017668	-13.407	1873	2312	24840
China_AmurRiver_Paleolithic	Mongolia_EIA_Xiongnu_7	Han_Liaoning	Mbuti.DG	-0.012464	-13.399	5724	6653	74514
Russia_Andronovo.SG	Vietnam_N	Han_Liaoning	Mbuti.DG	-0.015343	-13.392	1900	2281	24806
Russia_MLBA_Sintashta	Mongolia_Arkhangai_Xiongnu	Han_Liaoning	Mbuti.DG	-0.004932	-13.368	7673	8179	102464
Mongolia_EBA_Ulgii_1	China_YR_MN	Han_Liaoning	Mbuti.DG	-0.006938	-13.361	7275	7934	94933
Iran_Hasanlu_IA.SG	Vietnam_N	Han_Liaoning	Mbuti.DG	-0.018983	-13.36	1712	2136	22331
Mongolia_Arkhangai_XiongnuEarlyMedieval_2	Japan_Jomon.SG	Han_Liaoning	Mbuti.DG	-0.011847	-13.289	5125	5911	66354
Mongolia_EBA_Ulgii_1	China_Upper_YR_LN	Han_Liaoning	Mbuti.DG	-0.006608	-13.285	7196	7821	94471
Laos_Hoabinhian.SG	China_AmurRiver_EarlyN	Han_Liaoning	Mbuti.DG	-0.016379	-13.283	2048	2502	27709
Laos_Hoabinhian.SG	China_AmurRiver_Mesolithic	Han_Liaoning	Mbuti.DG	-0.016067	-13.26	1918	2334	25860
Hungary_LateC_EBA_Baden_Yamnaya	Vietnam_N	Han_Liaoning	Mbuti.DG	-0.016485	-13.234	1784	2169	23355
Laos_Hoabinhian.SG	China_WLR_BA	Han_Liaoning	Mbuti.DG	-0.019046	-13.177	1641	2068	22424
China_Xinjian_IA.SG	Taiwan_Gongguan	Han_Liaoning	Mbuti.DG	-0.012639	-13.152	3639	4240	47564
Russia_Caucasus_EBA_Yamnaya	Mongolia_Uvs_EIAXiongnuLateMedival	Han_Liaoning	Mbuti.DG	-0.007367	-13.152	5368	5900	72172
Mongolia_Uvs_EIAXiongnuLateMedival	Russia_EarlyMedieval_Heshui_Mohe_1	Han_Liaoning	Mbuti.DG	-0.013744	-13.141	2229	2637	29645
Mongolia_Uvs_EIAXiongnuLateMedival	Vietnam_BA	Han_Liaoning	Mbuti.DG	-0.012802	-13.128	2500	2923	33000
Mongolia_LBA_MongunTaiga_3	Mongolia_EBA_Ulgii_1	Han_Liaoning	Mbuti.DG	-0.007376	-13.103	6858	7521	89766
China_Xinjian_IA.SG	China_AmurRiver_EarlyN	Han_Liaoning	Mbuti.DG	-0.011009	-13.06	4080	4667	53320
Ukraine_EBA_Yamnaya	Mongolia_LBA_MongunTaiga_3	Han_Liaoning	Mbuti.DG	-0.009185	-13.048	5479	6168	75045
Mongolia_LBA_CenterWest_4	China_Upper_YR_LN	Han_Liaoning	Mbuti.DG	-0.005579	-13.003	7712	8271	100269
Russia_Caucasus_EBA_Yamnaya	China_SEastAsia_Coastal_EN	Han_Liaoning	Mbuti.DG	-0.016557	-12.996	2120	2590	28402
Iran_GanjDareh_N	China_Tianyuan	Han_Liaoning	Mbuti.DG	-0.010313	-12.992	6421	7265	81804
China_AmurRiver_Paleolithic	Mongolia_LBA_Khovsgol_6	Han_Liaoning	Mbuti.DG	-0.009189	-12.969	7260	8114	92929
Mongolia_LBA_Khovsgol_6	China_WLR_MN	Han_Liaoning	Mbuti.DG	-0.00611	-12.945	7920	8554	103799
Mongolia_Uvs_EIAXiongnuLateMedival	China_AR_EN	Han_Liaoning	Mbuti.DG	-0.012477	-12.942	2529	2949	33644
Mongolia_EIA_2	Mongolia_LBA_Khovsgol_6	Han_Liaoning	Mbuti.DG	-0.008735	-12.929	5789	6459	76704
China_Tianyuan	Mongolia_LBA_Khovsgol_6	Han_Liaoning	Mbuti.DG	-0.009196	-12.901	6488	7254	83339
Iran_Hasanlu_IA.SG	China_Xinjian_IA.SG	Han_Liaoning	Mbuti.DG	-0.011295	-12.891	4880	5613	64875
Laos_Hoabinhian.SG	Mongolia_Khentii_Xiongnu	Han_Liaoning	Mbuti.DG	-0.01485	-12.863	2477	2971	33227
Iran_TepeAbdulHosein_N.SG	Mongolia_EIA_Pazyryk_6	Han_Liaoning	Mbuti.DG	-0.010392	-12.84	5514	6280	73754
China_Tianyuan	Mongolia_EIA_Xiongnu_7	Han_Liaoning	Mbuti.DG	-0.012143	-12.812	5286	6125	69134
Iran_Wezmeh_N.SG	Mongolia_Arkhangai_Xiongnu	Han_Liaoning	Mbuti.DG	-0.007937	-12.797	7778	8597	103137
Iran_TepeAbdulHosein_N.SG	Mongolia_EIA_2	Han_Liaoning	Mbuti.DG	-0.01028	-12.763	5356	6098	72218
Laos_Hoabinhian.SG	China_AmurRiver_LPaleolithic	Han_Liaoning	Mbuti.DG	-0.014155	-12.761	2370	2816	31450
Mongolia_LBA_CenterWest_5	Vietnam_BA	Han_Liaoning	Mbuti.DG	-0.013917	-12.725	2479	2934	32669
Russia_Alan.SG	Mongolia_LBA_CenterWest_5	Han_Liaoning	Mbuti.DG	-0.007504	-12.725	7362	8099	98258
Laos_Hoabinhian.SG	China_NEastAsia_Inland_EN	Han_Liaoning	Mbuti.DG	-0.015911	-12.692	2278	2764	30496
Russia_Caucasus_EBA_Yamnaya	Vietnam_N	Han_Liaoning	Mbuti.DG	-0.016005	-12.687	1648	2002	22123
Japan_Jomon.SG	China_YR_LN	Han_Liaoning	Mbuti.DG	-0.008096	-12.666	6398	7073	83383
Mongolia_EIA_Sagly_4	China_AR_EN	Han_Liaoning	Mbuti.DG	-0.011624	-12.663	2554	2946	33715
China_Xinjian_IA.SG	Mongolia_Tuv_Xiongnu	Han_Liaoning	Mbuti.DG	-0.010532	-12.652	5076	5781	66875
Mongolia_EIA_Pazyryk_6	Mongolia_EBA_Ulgii_1	Han_Liaoning	Mbuti.DG	-0.009239	-12.619	5776	6482	76396
China_AmurRiver_Paleolithic	Mongolia_EBA_Ulgii_1	Han_Liaoning	Mbuti.DG	-0.009671	-12.619	6873	7728	88439
Mongolia_EIA_Sagly_4	Vietnam_BA	Han_Liaoning	Mbuti.DG	-0.011524	-12.607	2511	2892	33035
Luxembourg_Loschbour.DG	Mongolia_Uvs_EIAXiongnuLateMedival	Han_Liaoning	Mbuti.DG	-0.006976	-12.607	7340	8022	97742
Mongolia_EIA_2	Mongolia_EIA_Xiongnu_7	Han_Liaoning	Mbuti.DG	-0.011776	-12.597	5006	5788	66348
China_Xinjian_IA.SG	China_WLR_BA	Han_Liaoning	Mbuti.DG	-0.012068	-12.583	3115	3611	41082
Mongolia_EIA_Sagly_4	Russia_EarlyMedieval_Heshui_Mohe_1	Han_Liaoning	Mbuti.DG	-0.012419	-12.562	2253	2621	29665
Mongolia_LBA_MongunTaiga_3	China_Miaozigou_MN	Han_Liaoning	Mbuti.DG	-0.013087	-12.559	2178	2555	28741
Laos_Hoabinhian.SG	Mongolia_Bulgan_Xiongnu	Han_Liaoning	Mbuti.DG	-0.013416	-12.536	2687	3169	35988
Mongolia_LBA_Khovsgol_6	Russia_DevilsCave_N.SG	Han_Liaoning	Mbuti.DG	-0.005598	-12.52	8007	8592	104518
Russia_Caucasus_EBA_Yamnaya	China_Xinjian_IA.SG	Han_Liaoning	Mbuti.DG	-0.010512	-12.51	3819	4362	51632
Hungary_LateC_EBA_Baden_Yamnaya	Mongolia_Arkhangai_Xiongnu	Han_Liaoning	Mbuti.DG	-0.006883	-12.448	6178	6745	82446
Mongolia_LBA_CenterWest_5	China_AR_EN	Han_Liaoning	Mbuti.DG	-0.013975	-12.44	2461	2915	32483
Luxembourg_Loschbour.DG	China_SEastAsia_Coastal_EN	Han_Liaoning	Mbuti.DG	-0.015723	-12.378	2308	2784	30259
Iran_GanjDareh_N	China_AmurRiver_Paleolithic	Han_Liaoning	Mbuti.DG	-0.009892	-12.361	7180	8077	90671
Laos_Hoabinhian.SG	Nepal_Mebrak_2125BP.SG	Han_Liaoning	Mbuti.DG	-0.015918	-12.312	2018	2455	27458
Mongolia_EIA_Sagly_4	China_AR_Xianbei_IA	Han_Liaoning	Mbuti.DG	-0.011576	-12.304	2006	2312	26428
Laos_Hoabinhian.SG	Taiwan_Gongguan	Han_Liaoning	Mbuti.DG	-0.016308	-12.303	1836	2245	25053
China_Xinjian_IA.SG	Mongolia_Khentii_Xiongnu	Han_Liaoning	Mbuti.DG	-0.010728	-12.284	4691	5356	61975
Ukraine_EBA_Yamnaya	China_SEastAsia_Coastal_EN	Han_Liaoning	Mbuti.DG	-0.016899	-12.279	2187	2678	29061
Russia_Afanasievo	Mongolia_LBA_CenterWest_5	Han_Liaoning	Mbuti.DG	-0.006454	-12.278	7318	7952	98307
Luxembourg_Loschbour.DG	China_Xinjian_IA.SG	Han_Liaoning	Mbuti.DG	-0.009287	-12.266	5332	5987	70515
Ukraine_EBA_Yamnaya	Mongolia_Uvs_EIAXiongnuLateMedival	Han_Liaoning	Mbuti.DG	-0.007857	-12.235	5667	6271	76838
Iran_Hasanlu_IA.SG	China_SEastAsia_Coastal_EN	Han_Liaoning	Mbuti.DG	-0.017419	-12.227	2149	2643	28306
Laos_Hoabinhian.SG	Nepal_Chokhopani_2800BP.SG	Han_Liaoning	Mbuti.DG	-0.013673	-12.165	3077	3643	41341
Mongolia_EBA_Ulgii_1	Taiwan_Hanben_IA	Han_Liaoning	Mbuti.DG	-0.005381	-12.132	7429	7941	95293
Mongolia_LBA_CenterWest_4	China_NEastAsia_Coastal_EN	Han_Liaoning	Mbuti.DG	-0.005061	-12.095	7376	7862	95909
China_Xinjian_IA.SG	Nepal_Mebrak_2125BP.SG	Han_Liaoning	Mbuti.DG	-0.011849	-12.094	3857	4449	49957
Mongolia_EBA_Ulgii_1	China_Shimao_LN	Han_Liaoning	Mbuti.DG	-0.006801	-12.072	7184	7826	94398
Mongolia_EBA_Ulgii_1	China_Upper_YR_IA	Han_Liaoning	Mbuti.DG	-0.006619	-12.064	7064	7675	92342
Russia_Andronovo.SG	China_Xinjian_IA.SG	Han_Liaoning	Mbuti.DG	-0.008728	-12.027	5613	6263	74467
Mongolia_Uvs_EIAXiongnuLateMedival	China_AR_Xianbei_IA	Han_Liaoning	Mbuti.DG	-0.012191	-12.014	1995	2317	26382
China_Tianyuan	Mongolia_EBA_Ulgii_1	Han_Liaoning	Mbuti.DG	-0.009507	-12.006	6256	7019	80217
Russia_Alan.SG	Mongolia_Arkhangai_Xiongnu	Han_Liaoning	Mbuti.DG	-0.005523	-12.005	7757	8323	102500
Hungary_LateC_EBA_Baden_Yamnaya	Mongolia_EIA_Pazyryk_6	Han_Liaoning	Mbuti.DG	-0.009109	-12.003	5209	5851	70488
Laos_Hoabinhian.SG	Mongolia_LBA_Khovsgol_6	Han_Liaoning	Mbuti.DG	-0.010381	-11.992	3087	3506	40438
Mongolia_EIA_2	Mongolia_EBA_Ulgii_1	Han_Liaoning	Mbuti.DG	-0.009223	-11.966	5674	6365	74973
Laos_Hoabinhian.SG	Mongolia_LBA_CenterWest_4	Han_Liaoning	Mbuti.DG	-0.011286	-11.965	2972	3412	38989
Iran_Wezmeh_N.SG	Mongolia_EIA_Pazyryk_6	Han_Liaoning	Mbuti.DG	-0.010066	-11.964	5898	6688	78467
Mongolia_LBA_CenterWest_4	Taiwan_Hanben_IA	Han_Liaoning	Mbuti.DG	-0.004252	-11.946	7925	8355	101088
Russia_Kalmykia_EBA_Yamnaya.SG	Mongolia_LBA_CenterWest_5	Han_Liaoning	Mbuti.DG	-0.007058	-11.939	7116	7792	95786
China_AmurRiver_Paleolithic	China_Miaozigou_MN	Han_Liaoning	Mbuti.DG	-0.01592	-11.938	2089	2541	28389
China_Xinjian_IA.SG	China_AmurRiver_LPaleolithic	Han_Liaoning	Mbuti.DG	-0.009208	-11.878	4625	5173	59440
Iran_TepeAbdulHosein_N.SG	China_AmurRiver_Paleolithic	Han_Liaoning	Mbuti.DG	-0.010007	-11.845	6901	7773	87169
China_Xinjian_IA.SG	China_SEastAsia_Coastal_LN	Han_Liaoning	Mbuti.DG	-0.010199	-11.837	3552	4019	45812
Russia_Afanasievo	Mongolia_Arkhangai_Xiongnu	Han_Liaoning	Mbuti.DG	-0.004427	-11.813	7676	8128	102124
Ukraine_EBA_Yamnaya	Vietnam_N	Han_Liaoning	Mbuti.DG	-0.017107	-11.793	1732	2119	22663
Laos_Hoabinhian.SG	China_SEastAsia_Coastal_LN	Han_Liaoning	Mbuti.DG	-0.014636	-11.793	1786	2145	24483
Iran_TepeAbdulHosein_N.SG	China_Tianyuan	Han_Liaoning	Mbuti.DG	-0.010209	-11.793	6150	6949	78337
China_AmurRiver_Paleolithic	China_AR_EN	Han_Liaoning	Mbuti.DG	-0.014765	-11.788	2362	2823	31215
China_Xinjian_IA.SG	Nepal_Chokhopani_2800BP.SG	Han_Liaoning	Mbuti.DG	-0.009609	-11.783	5794	6513	74865
Iran_Wezmeh_N.SG	Mongolia_EIA_2	Han_Liaoning	Mbuti.DG	-0.010274	-11.694	5788	6577	76788
Mongolia_LBA_CenterWest_4	China_Shimao_LN	Han_Liaoning	Mbuti.DG	-0.005609	-11.671	7729	8291	100150
China_Xinjian_IA.SG	Mongolia_Bulgan_Xiongnu	Han_Liaoning	Mbuti.DG	-0.008677	-11.653	5114	5690	66323
China_Tianyuan	China_Miaozigou_MN	Han_Liaoning	Mbuti.DG	-0.01563	-11.64	1950	2356	25957
Mongolia_LBA_MongunTaiga_3	China_AR_EN	Han_Liaoning	Mbuti.DG	-0.012303	-11.614	2399	2787	31579
Ukraine_EBA_Yamnaya	China_Xinjian_IA.SG	Han_Liaoning	Mbuti.DG	-0.010311	-11.562	4058	4623	54791
Mongolia_EBA_Ulgii_1	China_NEastAsia_Coastal_EN	Han_Liaoning	Mbuti.DG	-0.00588	-11.542	7004	7543	91719
Mongolia_LBA_CenterWest_4	China_Upper_YR_IA	Han_Liaoning	Mbuti.DG	-0.00555	-11.542	7541	8084	97757
China_Xinjian_IA.SG	China_NEastAsia_Inland_EN	Han_Liaoning	Mbuti.DG	-0.010262	-11.527	4390	4985	57957
China_Xinjian_IA.SG	Mongolia_LBA_CenterWest_4	Han_Liaoning	Mbuti.DG	-0.007034	-11.477	5540	6043	71485
Russia_MLBA_Sintashta	Mongolia_EIA_Pazyryk_6	Han_Liaoning	Mbuti.DG	-0.007276	-11.46	5737	6308	78420
Japan_Jomon.SG	China_YR_LBIA	Han_Liaoning	Mbuti.DG	-0.007868	-11.355	6367	7019	82891
Iran_Hasanlu_IA.SG	Mongolia_LBA_CenterWest_5	Han_Liaoning	Mbuti.DG	-0.008417	-11.329	6470	7193	85890
Mongolia_EBA_Ulgii_1	China_WLR_LN	Han_Liaoning	Mbuti.DG	-0.006986	-11.282	6191	6758	81072
Japan_Jomon.SG	China_YR_MN	Han_Liaoning	Mbuti.DG	-0.008023	-11.245	6353	7019	82964
Mongolia_Arkhangai_XiongnuEarlyMedieval_2	China_SEastAsia_Coastal_EN	Han_Liaoning	Mbuti.DG	-0.013956	-11.22	2255	2672	29888
China_AmurRiver_Paleolithic	Vietnam_BA	Han_Liaoning	Mbuti.DG	-0.014081	-11.2	2426	2878	32094
Luxembourg_Loschbour.DG	Vietnam_N	Han_Liaoning	Mbuti.DG	-0.014003	-11.183	1846	2178	23704
Russia_MLBA_Sintashta	Mongolia_EIA_2	Han_Liaoning	Mbuti.DG	-0.007321	-11.174	5633	6195	76763
Russia_Alan.SG	Mongolia_EIA_Pazyryk_6	Han_Liaoning	Mbuti.DG	-0.007849	-11.174	5793	6405	77943
Japan_Jomon.SG	China_Upper_YR_LN	Han_Liaoning	Mbuti.DG	-0.00765	-11.168	6306	6938	82645
Mongolia_LBA_MongunTaiga_3	Vietnam_BA	Han_Liaoning	Mbuti.DG	-0.011491	-11.138	2453	2824	32297
Mongolia_LBA_Khovsgol_6	Mongolia_Tuv_LatEMedieval	Han_Liaoning	Mbuti.DG	-0.004767	-11.128	7153	7598	93243
Mongolia_Arkhangai_Xiongnu	China_SEastAsia_Coastal_EN	Han_Liaoning	Mbuti.DG	-0.011872	-11.114	2435	2809	31528
Mongolia_EIA_2	China_Miaozigou_MN	Han_Liaoning	Mbuti.DG	-0.01504	-11.109	1794	2155	24021
Mongolia_LBA_CenterWest_4	China_WLR_LN	Han_Liaoning	Mbuti.DG	-0.00613	-11.108	6527	7048	85028
Hungary_LateC_EBA_Baden_Yamnaya	Mongolia_EIA_2	Han_Liaoning	Mbuti.DG	-0.008731	-11.097	5127	5732	69316
Mongolia_LBA_CenterWest_5	China_AR_Xianbei_IA	Han_Liaoning	Mbuti.DG	-0.013239	-11.061	1930	2266	25401
Russia_Alan.SG	Mongolia_EIA_2	Han_Liaoning	Mbuti.DG	-0.007846	-11.042	5709	6307	76288
Mongolia_Uvs_EIAXiongnuLateMedival	Japan_Jomon.SG	Han_Liaoning	Mbuti.DG	-0.007551	-11.009	6368	6982	81299
Russia_Samara_EBA_Yamnaya	Mongolia_LBA_CenterWest_5	Han_Liaoning	Mbuti.DG	-0.006275	-10.987	7224	7830	96701
Mongolia_EIA_Pazyryk_6	China_Miaozigou_MN	Han_Liaoning	Mbuti.DG	-0.015091	-10.975	1860	2231	24539
Mongolia_LBA_Khovsgol_6	Mongolia_North_N	Han_Liaoning	Mbuti.DG	-0.003856	-10.86	7463	7844	98791
Mongolia_Arkhangai_XiongnuEarlyMedieval_2	Mongolia_EIA_Sagly_4	Han_Liaoning	Mbuti.DG	-0.005791	-10.853	6387	6873	83953
Mongolia_LBA_CenterWest_5	Russia_EarlyMedieval_Heshui_Mohe_1	Han_Liaoning	Mbuti.DG	-0.012936	-10.847	2240	2620	29421
China_AmurRiver_Paleolithic	Russia_EarlyMedieval_Heshui_Mohe_1	Han_Liaoning	Mbuti.DG	-0.014381	-10.819	2184	2601	29017
China_Tianyuan	Vietnam_BA	Han_Liaoning	Mbuti.DG	-0.013588	-10.758	2278	2688	30167
Mongolia_EIA_Pazyryk_6	China_AR_EN	Han_Liaoning	Mbuti.DG	-0.014305	-10.718	2051	2440	27147
Iran_Hasanlu_IA.SG	Mongolia_EIA_2	Han_Liaoning	Mbuti.DG	-0.00909	-10.702	5005	5620	67656
Mongolia_EIA_2	China_AR_EN	Han_Liaoning	Mbuti.DG	-0.014292	-10.7	1974	2353	26476
Mongolia_Arkhangai_XiongnuEarlyMedieval_2	Vietnam_N	Han_Liaoning	Mbuti.DG	-0.013305	-10.661	1777	2087	23285
Iran_Wezmeh_N.SG	China_AmurRiver_Paleolithic	Han_Liaoning	Mbuti.DG	-0.009692	-10.649	7445	8350	93321
Russia_Kalmykia_EBA_Yamnaya.SG	Mongolia_Arkhangai_Xiongnu	Han_Liaoning	Mbuti.DG	-0.00502	-10.6	7444	7943	99458
Mongolia_EIA_2	Vietnam_BA	Han_Liaoning	Mbuti.DG	-0.013357	-10.58	2182	2576	29455
Mongolia_EIA_Pazyryk_6	Vietnam_BA	Han_Liaoning	Mbuti.DG	-0.013102	-10.574	2235	2625	29808
China_Xinjian_IA.SG	Mongolia_LBA_Khovsgol_6	Han_Liaoning	Mbuti.DG	-0.006048	-10.567	5705	6150	73631
Mongolia_LBA_MongunTaiga_3	Russia_EarlyMedieval_Heshui_Mohe_1	Han_Liaoning	Mbuti.DG	-0.011682	-10.563	2224	2565	29202
Mongolia_Arkhangai_Xiongnu	Vietnam_N	Han_Liaoning	Mbuti.DG	-0.01118	-10.528	1934	2211	24764
China_Xinjian_IA.SG	Mongolia_EIA_Xiongnu_7	Han_Liaoning	Mbuti.DG	-0.009091	-10.503	4203	4703	55025
Mongolia_EBA_Ulgii_1	China_WLR_MN	Han_Liaoning	Mbuti.DG	-0.006109	-10.496	7205	7784	94786
Japan_Jomon.SG	China_Upper_YR_IA	Han_Liaoning	Mbuti.DG	-0.007865	-10.478	6115	6746	80213
Mongolia_LBA_CenterWest_4	Russia_MN_Boisman	Han_Liaoning	Mbuti.DG	-0.00405	-10.462	7210	7591	94113
Mongolia_EIA_Pazyryk_6	Russia_EarlyMedieval_Heshui_Mohe_1	Han_Liaoning	Mbuti.DG	-0.013723	-10.387	2046	2419	27223
Japan_Jomon.SG	China_Shimao_LN	Han_Liaoning	Mbuti.DG	-0.007902	-10.386	6320	6971	82442
Laos_Hoabinhian.SG	Mongolia_EIA_Xiongnu_7	Han_Liaoning	Mbuti.DG	-0.013282	-10.375	2164	2547	28803
Mongolia_EIA_2	Russia_EarlyMedieval_Heshui_Mohe_1	Han_Liaoning	Mbuti.DG	-0.013962	-10.338	2009	2383	26810
Russia_Kalmykia_EBA_Yamnaya.SG	Mongolia_EIA_Pazyryk_6	Han_Liaoning	Mbuti.DG	-0.007279	-10.333	5693	6254	77077
China_Tianyuan	Russia_EarlyMedieval_Heshui_Mohe_1	Han_Liaoning	Mbuti.DG	-0.01416	-10.287	2085	2473	27388
Japan_Jomon.SG	Taiwan_Hanben_IA	Han_Liaoning	Mbuti.DG	-0.006564	-10.284	6341	6886	82934
Mongolia_LBA_Khovsgol_6	China_AmurRiver_EarlyN	Han_Liaoning	Mbuti.DG	-0.005542	-10.243	5733	6149	75055
Russia_Andronovo.SG	Mongolia_LBA_CenterWest_5	Han_Liaoning	Mbuti.DG	-0.006203	-10.228	7343	7953	98366
Mongolia_LBA_Khovsgol_6	China_WLR_BA	Han_Liaoning	Mbuti.DG	-0.006676	-10.193	4336	4717	56940
China_Xinjian_IA.SG	China_Miaozigou_MN	Han_Liaoning	Mbuti.DG	-0.01324	-10.192	1676	1972	22328
Iran_GanjDareh_N	Mongolia_Arkhangai_XiongnuEarlyMedieval_2	Han_Liaoning	Mbuti.DG	-0.006112	-10.181	6215	6719	82415
Iran_Wezmeh_N.SG	China_Tianyuan	Han_Liaoning	Mbuti.DG	-0.009566	-10.179	6666	7465	83507
Russia_Afanasievo	Mongolia_EIA_2	Han_Liaoning	Mbuti.DG	-0.006578	-10.172	5648	6153	76755
Japan_Jomon.SG	China_WLR_LN	Han_Liaoning	Mbuti.DG	-0.008452	-10.106	5345	5931	69384
Mongolia_LBA_MongunTaiga_3	China_AR_Xianbei_IA	Han_Liaoning	Mbuti.DG	-0.011447	-10.085	1884	2166	24640
Russia_Afanasievo	Mongolia_EIA_Pazyryk_6	Han_Liaoning	Mbuti.DG	-0.00653	-10.082	5766	6278	78395
Mongolia_EBA_Ulgii_1	Russia_MN_Boisman	Han_Liaoning	Mbuti.DG	-0.00493	-10.064	6889	7335	90556
Laos_Hoabinhian.SG	Mongolia_EBA_Ulgii_1	Han_Liaoning	Mbuti.DG	-0.010055	-10.058	2780	3146	36411
Iran_Hasanlu_IA.SG	Mongolia_EIA_Pazyryk_6	Han_Liaoning	Mbuti.DG	-0.008779	-9.997	5136	5744	69192
Mongolia_LBA_Khovsgol_6	China_AmurRiver_Mesolithic	Han_Liaoning	Mbuti.DG	-0.004987	-9.983	5432	5785	70766
Mongolia_LBA_Khovsgol_6	Russia_Buryatia_Xiongnu	Han_Liaoning	Mbuti.DG	-0.003625	-9.974	7613	7974	99609
Ukraine_EBA_Yamnaya	Mongolia_LBA_CenterWest_5	Han_Liaoning	Mbuti.DG	-0.007477	-9.968	5629	6195	75804
Mongolia_LBA_CenterWest_5	Japan_Jomon.SG	Han_Liaoning	Mbuti.DG	-0.007981	-9.956	6100	6719	77580
Hungary_LateC_EBA_Baden_Yamnaya	China_AmurRiver_Paleolithic	Han_Liaoning	Mbuti.DG	-0.008759	-9.881	6290	6982	78963
Hungary_LateC_EBA_Baden_Yamnaya	China_Tianyuan	Han_Liaoning	Mbuti.DG	-0.008929	-9.854	5767	6416	72704
China_Tianyuan	China_AR_EN	Han_Liaoning	Mbuti.DG	-0.012676	-9.833	2132	2493	28497
Japan_Jomon.SG	China_NEastAsia_Coastal_EN	Han_Liaoning	Mbuti.DG	-0.006901	-9.814	5943	6474	76999
Russia_Samara_EBA_Yamnaya	Mongolia_Arkhangai_Xiongnu	Han_Liaoning	Mbuti.DG	-0.004247	-9.794	7550	7975	100191
Mongolia_LBA_Khovsgol_6	Mongolia_East_N	Han_Liaoning	Mbuti.DG	-0.004432	-9.762	7028	7438	92555
Russia_Kalmykia_EBA_Yamnaya.SG	Mongolia_EIA_2	Han_Liaoning	Mbuti.DG	-0.007269	-9.752	5577	6126	75491
Mongolia_Arkhangai_Xiongnu	Mongolia_EIA_Sagly_4	Han_Liaoning	Mbuti.DG	-0.003606	-9.725	7881	8247	101679
Mongolia_LBA_CenterWest_4	China_AmurRiver_N	Han_Liaoning	Mbuti.DG	-0.004049	-9.723	6265	6597	81999
Mongolia_EBA_Ulgii_1	China_AmurRiver_N	Han_Liaoning	Mbuti.DG	-0.005009	-9.685	6049	6449	79840
Mongolia_EIA_Sagly_4	Japan_Jomon.SG	Han_Liaoning	Mbuti.DG	-0.006512	-9.685	6439	6970	81480
Mongolia_LBA_CenterWest_4	China_WLR_MN	Han_Liaoning	Mbuti.DG	-0.004916	-9.655	7732	8226	100581
Mongolia_EBA_Ulgii_1	Russia_DevilsCave_N.SG	Han_Liaoning	Mbuti.DG	-0.005376	-9.637	7305	7818	95333
Russia_Samara_EBA_Yamnaya	Mongolia_EIA_Pazyryk_6	Han_Liaoning	Mbuti.DG	-0.006458	-9.59	5747	6249	77704
Mongolia_EIA_SlabGrave_1	China_YR_LN	Han_Liaoning	Mbuti.DG	-0.003027	-9.499	8019	8331	103278
China_Xinjian_IA.SG	Mongolia_EBA_Ulgii_1	Han_Liaoning	Mbuti.DG	-0.006519	-9.495	5246	5686	67513
Iran_GanjDareh_N	Russia_Afanasievo	Han_Liaoning	Mbuti.DG	-0.003765	-9.453	7437	7809	98881
Luxembourg_Loschbour.DG	Mongolia_LBA_CenterWest_5	Han_Liaoning	Mbuti.DG	-0.006322	-9.418	7019	7609	93350
China_AmurRiver_Paleolithic	China_AR_Xianbei_IA	Han_Liaoning	Mbuti.DG	-0.013689	-9.409	1829	2162	24301
Laos_Hoabinhian.SG	China_Miaozigou_MN	Han_Liaoning	Mbuti.DG	-0.017927	-9.37	897	1117	12311
Russia_Caucasus_EBA_Yamnaya	Mongolia_LBA_CenterWest_5	Han_Liaoning	Mbuti.DG	-0.00662	-9.366	5299	5771	71236
Iran_Hasanlu_IA.SG	Mongolia_Arkhangai_Xiongnu	Han_Liaoning	Mbuti.DG	-0.006146	-9.364	6751	7299	89280
China_Tianyuan	China_AR_Xianbei_IA	Han_Liaoning	Mbuti.DG	-0.013508	-9.355	1671	1969	22065
Mongolia_Uvs_EIAXiongnuLateMedival	China_SEastAsia_Coastal_EN	Han_Liaoning	Mbuti.DG	-0.009611	-9.339	2438	2741	31544
Mongolia_EIA_SlabGrave_1	China_YR_LBIA	Han_Liaoning	Mbuti.DG	-0.003287	-9.307	7939	8276	102737
Mongolia_LBA_Khovsgol_6	Nepal_Samdzong_1500BP.SG	Han_Liaoning	Mbuti.DG	-0.003846	-9.28	8208	8610	104512
Mongolia_EIA_Pazyryk_6	Japan_Jomon.SG	Han_Liaoning	Mbuti.DG	-0.008515	-9.279	4808	5333	61705
Mongolia_LBA_Khovsgol_6	Taiwan_Gongguan	Han_Liaoning	Mbuti.DG	-0.006091	-9.276	5170	5575	66514
Mongolia_Arkhangai_XiongnuEarlyMedieval_2	Mongolia_LBA_MongunTaiga_3	Han_Liaoning	Mbuti.DG	-0.005756	-9.264	6136	6598	80334
Mongolia_Arkhangai_XiongnuEarlyMedieval_2	China_Xinjian_IA.SG	Han_Liaoning	Mbuti.DG	-0.007347	-9.247	4606	5046	59884
Russia_Samara_EBA_Yamnaya	Mongolia_EIA_2	Han_Liaoning	Mbuti.DG	-0.006446	-9.243	5609	6100	76173
Mongolia_LBA_CenterWest_4	Russia_DevilsCave_N.SG	Han_Liaoning	Mbuti.DG	-0.004314	-9.216	7781	8218	101218
Iran_Hasanlu_IA.SG	China_Tianyuan	Han_Liaoning	Mbuti.DG	-0.009081	-9.164	5854	6520	73328
Russia_Alan.SG	China_AmurRiver_Paleolithic	Han_Liaoning	Mbuti.DG	-0.007315	-9.092	7499	8177	92734
Mongolia_EBA_Ulgii_1	Mongolia_EIA_SlabGrave_1	Han_Liaoning	Mbuti.DG	-0.003809	-9.088	7173	7534	94649
Mongolia_EIA_2	China_AR_Xianbei_IA	Han_Liaoning	Mbuti.DG	-0.013749	-9.066	1560	1841	20471
Russia_Buryatia_Xiongnu	China_YR_LBIA	Han_Liaoning	Mbuti.DG	-0.003684	-9.063	7711	8079	99995
Russia_MLBA_Sintashta	China_Tianyuan	Han_Liaoning	Mbuti.DG	-0.006915	-9.049	6679	7256	83430
Russia_Alan.SG	China_Tianyuan	Han_Liaoning	Mbuti.DG	-0.007561	-8.973	6692	7319	82983
Mongolia_LBA_Khovsgol_6	Mongolia_Khentii_Xiongnu	Han_Liaoning	Mbuti.DG	-0.005108	-8.957	6597	7042	87212
Mongolia_LBA_CenterWest_4	Mongolia_EIA_SlabGrave_1	Han_Liaoning	Mbuti.DG	-0.002688	-8.955	7591	7860	99950
Mongolia_LBA_Khovsgol_6	Mongolia_Tuv_Xiongnu	Han_Liaoning	Mbuti.DG	-0.004904	-8.935	7190	7650	93911
Russia_MLBA_Sintashta	China_AmurRiver_Paleolithic	Han_Liaoning	Mbuti.DG	-0.006665	-8.917	7531	8152	93120
Iran_GanjDareh_N	Laos_Hoabinhian.SG	Han_Liaoning	Mbuti.DG	-0.008594	-8.908	2962	3291	38319
Japan_Jomon.SG	Russia_DevilsCave_N.SG	Han_Liaoning	Mbuti.DG	-0.006367	-8.888	6403	6934	83447
Iran_GanjDareh_N	Russia_Samara_EBA_Yamnaya	Han_Liaoning	Mbuti.DG	-0.004035	-8.871	7311	7704	97256
Japan_Jomon.SG	Russia_MN_Boisman	Han_Liaoning	Mbuti.DG	-0.006276	-8.859	5744	6215	75061
Mongolia_LBA_CenterWest_5	China_SEastAsia_Coastal_EN	Han_Liaoning	Mbuti.DG	-0.010382	-8.852	2409	2734	31312
Russia_Andronovo.SG	Mongolia_Arkhangai_Xiongnu	Han_Liaoning	Mbuti.DG	-0.004248	-8.823	7708	8144	102518
Iran_TepeAbdulHosein_N.SG	Mongolia_Arkhangai_XiongnuEarlyMedieval_2	Han_Liaoning	Mbuti.DG	-0.005618	-8.747	5940	6384	79037
Japan_Jomon.SG	China_WLR_MN	Han_Liaoning	Mbuti.DG	-0.006561	-8.744	6406	6950	82890
Laos_Hoabinhian.SG	Vietnam_BA	Han_Liaoning	Mbuti.DG	-0.015902	-8.732	946	1156	13168
Ukraine_EBA_Yamnaya	Mongolia_EIA_2	Han_Liaoning	Mbuti.DG	-0.007879	-8.704	4846	5368	66202
Ukraine_EBA_Yamnaya	Mongolia_EIA_Pazyryk_6	Han_Liaoning	Mbuti.DG	-0.00765	-8.697	4975	5491	67416
Mongolia_EIA_Pazyryk_6	China_AR_Xianbei_IA	Han_Liaoning	Mbuti.DG	-0.012557	-8.666	1597	1860	20878
Mongolia_EIA_Sagly_4	China_SEastAsia_Coastal_EN	Han_Liaoning	Mbuti.DG	-0.008679	-8.641	2442	2716	31569
Russia_Andronovo.SG	Mongolia_EIA_Pazyryk_6	Han_Liaoning	Mbuti.DG	-0.006388	-8.557	5803	6303	78262
Japan_Jomon.SG	China_AmurRiver_N	Han_Liaoning	Mbuti.DG	-0.006384	-8.538	5022	5437	65039
Mongolia_EBA_Ulgii_1	Mongolia_Tuv_LatEMedieval	Han_Liaoning	Mbuti.DG	-0.004488	-8.518	6800	7196	88400
China_Tianyuan	Japan_Jomon.SG	Han_Liaoning	Mbuti.DG	-0.008006	-8.497	5114	5640	65631
Mongolia_EIA_SlabGrave_1	China_YR_MN	Han_Liaoning	Mbuti.DG	-0.003331	-8.491	7962	8304	102748
Russia_Caucasus_EBA_Yamnaya	Mongolia_EIA_Pazyryk_6	Han_Liaoning	Mbuti.DG	-0.006996	-8.484	4675	5121	63749
Russia_Afanasievo	China_Tianyuan	Han_Liaoning	Mbuti.DG	-0.00635	-8.464	6692	7221	83372
China_AmurRiver_Paleolithic	Japan_Jomon.SG	Han_Liaoning	Mbuti.DG	-0.008356	-8.458	5700	6311	73212
Russia_Andronovo.SG	Mongolia_EIA_2	Han_Liaoning	Mbuti.DG	-0.006265	-8.453	5712	6191	76602
Russia_Kalmykia_EBA_Yamnaya.SG	China_Tianyuan	Han_Liaoning	Mbuti.DG	-0.006944	-8.424	6512	7080	81845
Mongolia_LBA_Khovsgol_6	China_SEastAsia_Coastal_LN	Han_Liaoning	Mbuti.DG	-0.004465	-8.423	4999	5285	63893
China_Xinjian_IA.SG	Russia_EarlyMedieval_Heshui_Mohe_1	Han_Liaoning	Mbuti.DG	-0.011519	-8.403	1638	1884	21281
Mongolia_Arkhangai_XiongnuEarlyMedieval_2	Mongolia_Uvs_EIAXiongnuLateMedival	Han_Liaoning	Mbuti.DG	-0.004767	-8.391	6399	6799	83794
Russia_Buryatia_Xiongnu	China_YR_LN	Han_Liaoning	Mbuti.DG	-0.003351	-8.363	7788	8124	100486
Mongolia_North_N	China_YR_LN	Han_Liaoning	Mbuti.DG	-0.003178	-8.353	7698	8014	99327
Mongolia_LBA_Khovsgol_6	China_Miaozigou_MN	Han_Liaoning	Mbuti.DG	-0.006967	-8.308	2364	2579	30972
Russia_Caucasus_EBA_Yamnaya	Mongolia_EIA_2	Han_Liaoning	Mbuti.DG	-0.006912	-8.299	4640	5072	62509
Russia_Afanasievo	China_AmurRiver_Paleolithic	Han_Liaoning	Mbuti.DG	-0.00613	-8.295	7530	8100	93011
Mongolia_EBA_Ulgii_1	China_WLR_BA	Han_Liaoning	Mbuti.DG	-0.006334	-8.241	4092	4431	53479
Russia_Kalmykia_EBA_Yamnaya.SG	China_AmurRiver_Paleolithic	Han_Liaoning	Mbuti.DG	-0.006669	-8.235	7356	7962	90921
Mongolia_EBA_Ulgii_1	China_AmurRiver_EarlyN	Han_Liaoning	Mbuti.DG	-0.005155	-8.232	5548	5925	73070
Laos_Hoabinhian.SG	Russia_EarlyMedieval_Heshui_Mohe_1	Han_Liaoning	Mbuti.DG	-0.016348	-8.223	787	961	10634
Ukraine_EBA_Yamnaya	Mongolia_Arkhangai_Xiongnu	Han_Liaoning	Mbuti.DG	-0.005379	-8.217	5731	6144	76721
Mongolia_LBA_Khovsgol_6	Nepal_Mebrak_2125BP.SG	Han_Liaoning	Mbuti.DG	-0.005615	-8.216	5382	5771	69230
Nepal_Samdzong_1500BP.SG	China_YR_LN	Han_Liaoning	Mbuti.DG	-0.003261	-8.206	8270	8618	106548
Mongolia_North_N	China_YR_LBIA	Han_Liaoning	Mbuti.DG	-0.003316	-8.204	7650	7978	98889
Iran_Hasanlu_IA.SG	China_AmurRiver_Paleolithic	Han_Liaoning	Mbuti.DG	-0.007957	-8.203	6601	7249	81411
Russia_Caucasus_EBA_Yamnaya	Mongolia_Arkhangai_Xiongnu	Han_Liaoning	Mbuti.DG	-0.004954	-8.141	5424	5781	72093
Mongolia_EBA_Ulgii_1	Mongolia_East_N	Han_Liaoning	Mbuti.DG	-0.004332	-8.067	6656	7038	88207
Nepal_Samdzong_1500BP.SG	China_YR_LBIA	Han_Liaoning	Mbuti.DG	-0.003412	-8.045	8197	8558	105859
Mongolia_LBA_MongunTaiga_3	Japan_Jomon.SG	Han_Liaoning	Mbuti.DG	-0.006076	-8.04	5862	6312	74192
Russia_Buryatia_Xiongnu	China_YR_MN	Han_Liaoning	Mbuti.DG	-0.003756	-8.04	7708	8083	99986
Mongolia_Uvs_EIAXiongnuLateMedival	Vietnam_N	Han_Liaoning	Mbuti.DG	-0.007998	-8.039	1945	2143	24804
China_Tianyuan	China_SEastAsia_Coastal_EN	Han_Liaoning	Mbuti.DG	-0.010349	-8.037	2297	2609	30078
Mongolia_LBA_CenterWest_4	Mongolia_Tuv_LatEMedieval	Han_Liaoning	Mbuti.DG	-0.003576	-7.992	7096	7425	91883
Mongolia_EBA_Ulgii_1	Mongolia_North_N	Han_Liaoning	Mbuti.DG	-0.003619	-7.945	7001	7337	93024
Mongolia_LBA_Khovsgol_6	China_AmurRiver_LPaleolithic	Han_Liaoning	Mbuti.DG	-0.003803	-7.92	6536	6854	83664
Mongolia_LBA_CenterWest_4	China_AmurRiver_EarlyN	Han_Liaoning	Mbuti.DG	-0.004386	-7.898	5697	6024	74625
Mongolia_EIA_2	Japan_Jomon.SG	Han_Liaoning	Mbuti.DG	-0.007898	-7.878	4792	5269	60397
Mongolia_Bulgan_Xiongnu	China_YR_LBIA	Han_Liaoning	Mbuti.DG	-0.004059	-7.854	7186	7564	93144
Mongolia_EBA_Ulgii_1	Mongolia_Khentii_Xiongnu	Han_Liaoning	Mbuti.DG	-0.005009	-7.842	6314	6733	83690
Iran_GanjDareh_N	Russia_MLBA_Sintashta	Han_Liaoning	Mbuti.DG	-0.003144	-7.78	7518	7829	99042
Vietnam_N	China_YR_LN	Han_Liaoning	Mbuti.DG	-0.007737	-7.762	1892	2085	24846
Mongolia_EIA_2	China_SEastAsia_Coastal_EN	Han_Liaoning	Mbuti.DG	-0.010903	-7.734	2215	2532	29039
Iran_GanjDareh_N	Russia_Andronovo.SG	Han_Liaoning	Mbuti.DG	-0.004112	-7.722	7464	7871	98871
Mongolia_Arkhangai_Xiongnu	China_Xinjian_IA.SG	Han_Liaoning	Mbuti.DG	-0.004858	-7.701	5646	6000	72777
China_AmurRiver_Paleolithic	China_SEastAsia_Coastal_EN	Han_Liaoning	Mbuti.DG	-0.01027	-7.662	2404	2724	31175
Japan_Jomon.SG	Mongolia_EIA_SlabGrave_1	Han_Liaoning	Mbuti.DG	-0.005045	-7.66	6352	6761	80960
Luxembourg_Loschbour.DG	Mongolia_Arkhangai_Xiongnu	Han_Liaoning	Mbuti.DG	-0.004412	-7.657	7387	7815	97179
Vietnam_N	China_Shimao_LN	Han_Liaoning	Mbuti.DG	-0.008585	-7.637	1868	2080	24694
China_Xinjian_IA.SG	Vietnam_BA	Han_Liaoning	Mbuti.DG	-0.010004	-7.631	1852	2092	23991
China_Xinjian_IA.SG	China_AR_EN	Han_Liaoning	Mbuti.DG	-0.009535	-7.63	1844	2076	24362
Mongolia_EIA_SlabGrave_1	China_Upper_YR_LN	Han_Liaoning	Mbuti.DG	-0.002956	-7.628	7898	8201	102290
Mongolia_LBA_CenterWest_4	Taiwan_Gongguan	Han_Liaoning	Mbuti.DG	-0.005034	-7.62	5172	5506	66270
Luxembourg_Loschbour.DG	Mongolia_EIA_Pazyryk_6	Han_Liaoning	Mbuti.DG	-0.006225	-7.613	5570	6035	74589
Nepal_Samdzong_1500BP.SG	China_YR_MN	Han_Liaoning	Mbuti.DG	-0.00339	-7.584	8188	8547	105939
Russia_Caucasus_EBA_Yamnaya	China_AmurRiver_Paleolithic	Han_Liaoning	Mbuti.DG	-0.006858	-7.576	5648	6128	69961
Iran_TepeAbdulHosein_N.SG	Russia_Afanasievo	Han_Liaoning	Mbuti.DG	-0.003689	-7.565	7276	7633	96973
Mongolia_North_N	China_YR_MN	Han_Liaoning	Mbuti.DG	-0.003389	-7.561	7656	7991	98863
Vietnam_N	Taiwan_Hanben_IA	Han_Liaoning	Mbuti.DG	-0.006654	-7.544	1847	2012	24845
Luxembourg_Loschbour.DG	Mongolia_EIA_2	Han_Liaoning	Mbuti.DG	-0.006281	-7.535	5467	5926	72984
Russia_Samara_EBA_Yamnaya	China_Tianyuan	Han_Liaoning	Mbuti.DG	-0.006014	-7.525	6641	7138	82743
Mongolia_LBA_MongunTaiga_3	China_SEastAsia_Coastal_EN	Han_Liaoning	Mbuti.DG	-0.008422	-7.517	2425	2687	31132
Russia_Samara_EBA_Yamnaya	China_AmurRiver_Paleolithic	Han_Liaoning	Mbuti.DG	-0.005833	-7.495	7442	7978	91898
Vietnam_N	China_YR_LBIA	Han_Liaoning	Mbuti.DG	-0.007452	-7.493	1896	2081	24820
Iran_Wezmeh_N.SG	Mongolia_Arkhangai_XiongnuEarlyMedieval_2	Han_Liaoning	Mbuti.DG	-0.005643	-7.481	6410	6886	84323
Mongolia_LBA_CenterWest_4	Mongolia_East_N	Han_Liaoning	Mbuti.DG	-0.003467	-7.47	6939	7256	91453
Mongolia_Bulgan_Xiongnu	China_YR_LN	Han_Liaoning	Mbuti.DG	-0.003806	-7.447	7252	7608	93546
Mongolia_EBA_Ulgii_1	Taiwan_Gongguan	Han_Liaoning	Mbuti.DG	-0.00555	-7.442	5087	5450	65314
Mongolia_LBA_CenterWest_4	China_AmurRiver_Mesolithic	Han_Liaoning	Mbuti.DG	-0.003772	-7.441	5424	5690	70422
Ukraine_EBA_Yamnaya	China_Tianyuan	Han_Liaoning	Mbuti.DG	-0.007084	-7.422	5519	6007	68943
China_Xinjian_IA.SG	China_AR_Xianbei_IA	Han_Liaoning	Mbuti.DG	-0.01061	-7.404	1477	1680	19117
Mongolia_Bulgan_Xiongnu	China_YR_MN	Han_Liaoning	Mbuti.DG	-0.00401	-7.4	7229	7603	93139
Japan_Jomon.SG	China_WLR_BA	Han_Liaoning	Mbuti.DG	-0.007127	-7.371	3510	3835	45557
Mongolia_Arkhangai_Xiongnu	Mongolia_LBA_MongunTaiga_3	Han_Liaoning	Mbuti.DG	-0.003695	-7.345	7268	7614	93546
Hungary_LateC_EBA_Baden_Yamnaya	Mongolia_Arkhangai_XiongnuEarlyMedieval_2	Han_Liaoning	Mbuti.DG	-0.004715	-7.337	5476	5821	73141
Mongolia_LBA_CenterWest_4	China_WLR_BA	Han_Liaoning	Mbuti.DG	-0.004982	-7.314	4297	4575	55846
Mongolia_EBA_Ulgii_1	China_AmurRiver_Mesolithic	Han_Liaoning	Mbuti.DG	-0.004218	-7.272	5297	5589	69152
Laos_Hoabinhian.SG	Japan_Jomon.SG	Han_Liaoning	Mbuti.DG	-0.008947	-7.268	2510	2808	33265
Mongolia_EBA_Ulgii_1	Russia_Buryatia_Xiongnu	Han_Liaoning	Mbuti.DG	-0.003426	-7.261	7104	7423	92894
Mongolia_LBA_CenterWest_5	Vietnam_N	Han_Liaoning	Mbuti.DG	-0.008432	-7.256	1932	2140	24589
Luxembourg_Loschbour.DG	China_AmurRiver_Paleolithic	Han_Liaoning	Mbuti.DG	-0.00629	-7.249	7149	7705	88407
Laos_Hoabinhian.SG	China_AR_EN	Han_Liaoning	Mbuti.DG	-0.013326	-7.219	1002	1181	13401
Iran_TepeAbdulHosein_N.SG	Russia_Samara_EBA_Yamnaya	Han_Liaoning	Mbuti.DG	-0.003891	-7.199	7076	7445	94891
Vietnam_N	China_YR_MN	Han_Liaoning	Mbuti.DG	-0.008075	-7.198	1883	2083	24793
Iran_TepeAbdulHosein_N.SG	Laos_Hoabinhian.SG	Han_Liaoning	Mbuti.DG	-0.007572	-7.193	2974	3267	38578
Mongolia_EBA_Ulgii_1	Nepal_Samdzong_1500BP.SG	Han_Liaoning	Mbuti.DG	-0.003691	-7.18	7477	7829	95333
Japan_Jomon.SG	Taiwan_Gongguan	Han_Liaoning	Mbuti.DG	-0.006919	-7.135	4005	4369	52631
Luxembourg_Loschbour.DG	China_Tianyuan	Han_Liaoning	Mbuti.DG	-0.006221	-7.12	6370	6863	79380
Ukraine_EBA_Yamnaya	China_AmurRiver_Paleolithic	Han_Liaoning	Mbuti.DG	-0.006855	-7.069	5982	6491	74251
Russia_Andronovo.SG	China_AmurRiver_Paleolithic	Han_Liaoning	Mbuti.DG	-0.0059	-7.061	7522	8070	92942
Japan_Jomon.SG	Mongolia_North_N	Han_Liaoning	Mbuti.DG	-0.005023	-7.046	6058	6449	77934
Russia_Andronovo.SG	China_Tianyuan	Han_Liaoning	Mbuti.DG	-0.006073	-7.044	6717	7222	83224
Mongolia_EIA_Pazyryk_6	China_SEastAsia_Coastal_EN	Han_Liaoning	Mbuti.DG	-0.00936	-7.042	2248	2520	29152
Vietnam_N	China_Upper_YR_LN	Han_Liaoning	Mbuti.DG	-0.007267	-7.032	1899	2078	24650
Nepal_Samdzong_1500BP.SG	China_Upper_YR_LN	Han_Liaoning	Mbuti.DG	-0.00308	-7.029	8134	8460	105547
Mongolia_EIA_Sagly_4	Vietnam_N	Han_Liaoning	Mbuti.DG	-0.006737	-7.02	1952	2119	24820
Japan_Jomon.SG	Mongolia_East_N	Han_Liaoning	Mbuti.DG	-0.005435	-6.969	5672	6069	73017
Mongolia_LBA_Khovsgol_6	Nepal_Chokhopani_2800BP.SG	Han_Liaoning	Mbuti.DG	-0.003974	-6.964	8198	8613	104337
Russia_Caucasus_EBA_Yamnaya	China_Tianyuan	Han_Liaoning	Mbuti.DG	-0.006487	-6.955	5195	5619	65256
Iran_GanjDareh_N	Russia_Kalmykia_EBA_Yamnaya.SG	Han_Liaoning	Mbuti.DG	-0.003353	-6.934	7244	7567	96329
Vietnam_N	China_WLR_LN	Han_Liaoning	Mbuti.DG	-0.008746	-6.912	1652	1848	22444
Mongolia_LBA_CenterWest_4	Mongolia_North_N	Han_Liaoning	Mbuti.DG	-0.002657	-6.908	7377	7636	97292
Laos_Hoabinhian.SG	China_AR_Xianbei_IA	Han_Liaoning	Mbuti.DG	-0.014487	-6.898	805	957	10444
Mongolia_EBA_Ulgii_1	Mongolia_Tuv_Xiongnu	Han_Liaoning	Mbuti.DG	-0.004364	-6.849	6753	7138	88171
Japan_Jomon.SG	Nepal_Samdzong_1500BP.SG	Han_Liaoning	Mbuti.DG	-0.004787	-6.838	6534	6933	83442
Mongolia_North_N	China_Upper_YR_LN	Han_Liaoning	Mbuti.DG	-0.002981	-6.83	7574	7867	98407
Iran_Wezmeh_N.SG	Laos_Hoabinhian.SG	Han_Liaoning	Mbuti.DG	-0.007599	-6.824	3225	3540	41372
Russia_Buryatia_Xiongnu	China_Upper_YR_LN	Han_Liaoning	Mbuti.DG	-0.003176	-6.823	7695	8011	99550
Japan_Jomon.SG	China_AmurRiver_EarlyN	Han_Liaoning	Mbuti.DG	-0.006083	-6.812	4523	4881	58991
Japan_Jomon.SG	China_AmurRiver_Mesolithic	Han_Liaoning	Mbuti.DG	-0.005697	-6.759	4320	4637	55567
Japan_Jomon.SG	Mongolia_Tuv_LatEMedieval	Han_Liaoning	Mbuti.DG	-0.005238	-6.753	5769	6155	73615
Mongolia_LBA_CenterWest_4	Mongolia_Khentii_Xiongnu	Han_Liaoning	Mbuti.DG	-0.00394	-6.728	6537	6877	86352
Mongolia_LBA_Khovsgol_6	China_NEastAsia_Inland_EN	Han_Liaoning	Mbuti.DG	-0.004101	-6.718	6205	6538	81352
China_SEastAsia_Coastal_EN	China_YR_LBIA	Han_Liaoning	Mbuti.DG	-0.006923	-6.683	2395	2613	31533
Mongolia_Bulgan_Xiongnu	China_Upper_YR_LN	Han_Liaoning	Mbuti.DG	-0.003716	-6.641	7169	7513	92702
Mongolia_EBA_Ulgii_1	China_Miaozigou_MN	Han_Liaoning	Mbuti.DG	-0.006678	-6.639	2206	2400	28939
Japan_Jomon.SG	Nepal_Chokhopani_2800BP.SG	Han_Liaoning	Mbuti.DG	-0.005262	-6.559	6526	6965	83316
Japan_Jomon.SG	Nepal_Mebrak_2125BP.SG	Han_Liaoning	Mbuti.DG	-0.006267	-6.55	4301	4649	55555
Vietnam_N	China_NEastAsia_Coastal_EN	Han_Liaoning	Mbuti.DG	-0.006736	-6.545	1856	2022	24608
Mongolia_EIA_Xiongnu_7	China_YR_LBIA	Han_Liaoning	Mbuti.DG	-0.004221	-6.544	5970	6296	77214
Mongolia_Bulgan_Xiongnu	China_Shimao_LN	Han_Liaoning	Mbuti.DG	-0.003888	-6.542	7152	7513	92634
Mongolia_LBA_Khovsgol_6	Mongolia_Bulgan_Xiongnu	Han_Liaoning	Mbuti.DG	-0.00314	-6.526	7182	7474	92902
China_AmurRiver_LPaleolithic	China_YR_LBIA	Han_Liaoning	Mbuti.DG	-0.00319	-6.49	6474	6740	83626
Russia_Buryatia_Xiongnu	China_Shimao_LN	Han_Liaoning	Mbuti.DG	-0.003375	-6.467	7676	8011	99421
Mongolia_EBA_Ulgii_1	Nepal_Mebrak_2125BP.SG	Han_Liaoning	Mbuti.DG	-0.005114	-6.445	4954	5281	63975
Vietnam_N	China_Upper_YR_IA	Han_Liaoning	Mbuti.DG	-0.006953	-6.443	1855	2024	24257
Iran_TepeAbdulHosein_N.SG	Russia_Andronovo.SG	Han_Liaoning	Mbuti.DG	-0.00378	-6.432	7338	7707	97748
Russia_Buryatia_Xiongnu	China_WLR_LN	Han_Liaoning	Mbuti.DG	-0.003823	-6.429	6498	6821	84507
Mongolia_EBA_Ulgii_1	China_SEastAsia_Coastal_LN	Han_Liaoning	Mbuti.DG	-0.00408	-6.428	4872	5127	62385
Mongolia_EIA_SlabGrave_1	China_Shimao_LN	Han_Liaoning	Mbuti.DG	-0.002906	-6.414	7918	8215	102143
Mongolia_EIA_Pazyryk_6	Vietnam_N	Han_Liaoning	Mbuti.DG	-0.008482	-6.402	1753	1947	22795
Mongolia_North_N	China_WLR_LN	Han_Liaoning	Mbuti.DG	-0.003619	-6.373	6465	6769	83959
Japan_Jomon.SG	Mongolia_Tuv_Xiongnu	Han_Liaoning	Mbuti.DG	-0.00533	-6.311	5814	6210	74337
Japan_Jomon.SG	Russia_Buryatia_Xiongnu	Han_Liaoning	Mbuti.DG	-0.004413	-6.269	6198	6546	78847
Japan_Jomon.SG	Mongolia_Khentii_Xiongnu	Han_Liaoning	Mbuti.DG	-0.005546	-6.255	5338	5720	68796
Mongolia_LBA_CenterWest_4	Mongolia_Tuv_Xiongnu	Han_Liaoning	Mbuti.DG	-0.00359	-6.238	7114	7445	92169
Iran_TepeAbdulHosein_N.SG	Russia_MLBA_Sintashta	Han_Liaoning	Mbuti.DG	-0.003002	-6.231	7372	7665	97349
Mongolia_Bulgan_Xiongnu	China_Upper_YR_IA	Han_Liaoning	Mbuti.DG	-0.003647	-6.219	7041	7371	90520
Mongolia_EIA_SlabGrave_1	China_Upper_YR_IA	Han_Liaoning	Mbuti.DG	-0.002742	-6.213	7736	8009	99622
Mongolia_Arkhangai_XiongnuEarlyMedieval_2	Mongolia_LBA_CenterWest_5	Han_Liaoning	Mbuti.DG	-0.004182	-6.209	6315	6658	82008
China_AmurRiver_Paleolithic	Vietnam_N	Han_Liaoning	Mbuti.DG	-0.00859	-6.193	1909	2117	24282
Mongolia_LBA_CenterWest_4	Nepal_Mebrak_2125BP.SG	Han_Liaoning	Mbuti.DG	-0.004366	-6.171	5278	5573	67374
Mongolia_Arkhangai_Xiongnu	Mongolia_Uvs_EIAXiongnuLateMedival	Han_Liaoning	Mbuti.DG	-0.002524	-6.134	7889	8145	101403
Mongolia_North_N	China_Upper_YR_IA	Han_Liaoning	Mbuti.DG	-0.00295	-6.132	7430	7714	96049
Mongolia_EIA_SlabGrave_1	China_WLR_LN	Han_Liaoning	Mbuti.DG	-0.003215	-6.131	6671	6948	86306
Iran_GanjDareh_N	Luxembourg_Loschbour.DG	Han_Liaoning	Mbuti.DG	-0.003856	-6.131	7282	7643	93724
Mongolia_Bulgan_Xiongnu	China_WLR_LN	Han_Liaoning	Mbuti.DG	-0.00386	-6.095	6104	6411	79643
Nepal_Samdzong_1500BP.SG	China_Shimao_LN	Han_Liaoning	Mbuti.DG	-0.003021	-6.066	8133	8452	105329
Mongolia_EIA_2	Vietnam_N	Han_Liaoning	Mbuti.DG	-0.008421	-6.051	1758	1948	22513
China_AmurRiver_LPaleolithic	China_YR_MN	Han_Liaoning	Mbuti.DG	-0.00333	-6.045	6509	6788	83611
Mongolia_EIA_Xiongnu_7	China_YR_LN	Han_Liaoning	Mbuti.DG	-0.004021	-6.017	6005	6316	77461
Russia_MLBA_Sintashta	Laos_Hoabinhian.SG	Han_Liaoning	Mbuti.DG	-0.005335	-5.985	3210	3427	40738
Mongolia_LBA_CenterWest_4	Nepal_Samdzong_1500BP.SG	Han_Liaoning	Mbuti.DG	-0.002581	-5.945	8005	8266	101215
Mongolia_North_N	China_Shimao_LN	Han_Liaoning	Mbuti.DG	-0.003013	-5.943	7576	7872	98331
China_SEastAsia_Coastal_EN	China_YR_MN	Han_Liaoning	Mbuti.DG	-0.00646	-5.939	2404	2607	31520
Iran_Wezmeh_N.SG	Russia_Samara_EBA_Yamnaya	Han_Liaoning	Mbuti.DG	-0.00369	-5.939	7734	8112	102232
Mongolia_Bulgan_Xiongnu	China_NEastAsia_Coastal_EN	Han_Liaoning	Mbuti.DG	-0.003267	-5.938	6928	7220	89317
Mongolia_LBA_CenterWest_4	China_SEastAsia_Coastal_LN	Han_Liaoning	Mbuti.DG	-0.003355	-5.934	4984	5197	63538
Iran_Wezmeh_N.SG	Russia_Afanasievo	Han_Liaoning	Mbuti.DG	-0.003459	-5.923	7957	8319	104660
China_AmurRiver_LPaleolithic	China_YR_LN	Han_Liaoning	Mbuti.DG	-0.002982	-5.909	6536	6787	83917
Russia_Buryatia_Xiongnu	China_Upper_YR_IA	Han_Liaoning	Mbuti.DG	-0.002994	-5.909	7534	7824	97018
Nepal_Samdzong_1500BP.SG	China_WLR_LN	Han_Liaoning	Mbuti.DG	-0.003407	-5.898	6787	7087	87880
Nepal_Samdzong_1500BP.SG	China_Upper_YR_IA	Han_Liaoning	Mbuti.DG	-0.002851	-5.891	7952	8244	102436
Mongolia_EBA_Ulgii_1	China_AmurRiver_LPaleolithic	Han_Liaoning	Mbuti.DG	-0.003328	-5.884	6313	6582	80676
Vietnam_N	China_AmurRiver_EarlyN	Han_Liaoning	Mbuti.DG	-0.007014	-5.865	1667	1823	22208
Iran_GanjDareh_N	Russia_Caucasus_EBA_Yamnaya	Han_Liaoning	Mbuti.DG	-0.003373	-5.854	5389	5631	71604
Japan_Jomon.SG	China_SEastAsia_Coastal_LN	Han_Liaoning	Mbuti.DG	-0.005173	-5.816	3903	4166	50817
Vietnam_N	China_WLR_MN	Han_Liaoning	Mbuti.DG	-0.006799	-5.812	1884	2053	24787
Vietnam_N	China_AmurRiver_N	Han_Liaoning	Mbuti.DG	-0.006392	-5.809	1766	1915	23165
Mongolia_LBA_Khovsgol_6	China_AR_EN	Han_Liaoning	Mbuti.DG	-0.004958	-5.801	2564	2732	33786
Russia_Alan.SG	Mongolia_Arkhangai_XiongnuEarlyMedieval_2	Han_Liaoning	Mbuti.DG	-0.003478	-5.791	6348	6639	83771
China_SEastAsia_Coastal_EN	China_YR_LN	Han_Liaoning	Mbuti.DG	-0.005866	-5.786	2427	2613	31600
China_Tianyuan	Vietnam_N	Han_Liaoning	Mbuti.DG	-0.008329	-5.755	1794	1986	23021
Russia_MLBA_Sintashta	Mongolia_Arkhangai_XiongnuEarlyMedieval_2	Han_Liaoning	Mbuti.DG	-0.002973	-5.75	6339	6589	84178
Mongolia_LBA_CenterWest_4	Russia_Buryatia_Xiongnu	Han_Liaoning	Mbuti.DG	-0.002304	-5.75	7512	7737	97567
Russia_Alan.SG	Laos_Hoabinhian.SG	Han_Liaoning	Mbuti.DG	-0.005543	-5.735	3240	3468	41180
Iran_TepeAbdulHosein_N.SG	Russia_Kalmykia_EBA_Yamnaya.SG	Han_Liaoning	Mbuti.DG	-0.003244	-5.724	7068	7375	94710
Vietnam_N	Russia_DevilsCave_N.SG	Han_Liaoning	Mbuti.DG	-0.006558	-5.714	1913	2076	24843
China_SEastAsia_Coastal_EN	China_Upper_YR_IA	Han_Liaoning	Mbuti.DG	-0.006454	-5.708	2356	2555	30837
Mongolia_EBA_Ulgii_1	Nepal_Chokhopani_2800BP.SG	Han_Liaoning	Mbuti.DG	-0.003866	-5.69	7443	7811	95152
Hungary_LateC_EBA_Baden_Yamnaya	Laos_Hoabinhian.SG	Han_Liaoning	Mbuti.DG	-0.006665	-5.688	2446	2654	31150
Vietnam_N	Taiwan_Gongguan	Han_Liaoning	Mbuti.DG	-0.007655	-5.645	1568	1730	21159
Mongolia_EIA_Xiongnu_7	China_YR_MN	Han_Liaoning	Mbuti.DG	-0.00399	-5.638	5951	6259	77198
Mongolia_LBA_Khovsgol_6	China_AR_Xianbei_IA	Han_Liaoning	Mbuti.DG	-0.005063	-5.632	2022	2156	26513
Japan_Jomon.SG	China_AmurRiver_LPaleolithic	Han_Liaoning	Mbuti.DG	-0.004605	-5.628	5141	5444	65838
Iran_GanjDareh_N	Russia_Alan.SG	Han_Liaoning	Mbuti.DG	-0.002746	-5.616	7500	7771	98695
Iran_Hasanlu_IA.SG	Mongolia_Arkhangai_XiongnuEarlyMedieval_2	Han_Liaoning	Mbuti.DG	-0.004354	-5.615	5582	5905	74011
Mongolia_East_N	China_YR_LBIA	Han_Liaoning	Mbuti.DG	-0.002777	-5.608	7177	7434	92559
Russia_Buryatia_Xiongnu	China_NEastAsia_Coastal_EN	Han_Liaoning	Mbuti.DG	-0.002624	-5.6	7342	7591	94974
Russia_Afanasievo	Laos_Hoabinhian.SG	Han_Liaoning	Mbuti.DG	-0.004944	-5.592	3199	3399	40492
Mongolia_EIA_SlabGrave_1	China_NEastAsia_Coastal_EN	Han_Liaoning	Mbuti.DG	-0.0022	-5.586	7509	7723	97016
Mongolia_LBA_CenterWest_4	China_AmurRiver_LPaleolithic	Han_Liaoning	Mbuti.DG	-0.002793	-5.585	6498	6730	82957
China_Xinjian_IA.SG	Japan_Jomon.SG	Han_Liaoning	Mbuti.DG	-0.005135	-5.522	4726	5030	59243
Vietnam_N	China_AmurRiver_Mesolithic	Han_Liaoning	Mbuti.DG	-0.006387	-5.516	1646	1784	21545
Laos_Hoabinhian.SG	China_SEastAsia_Coastal_EN	Han_Liaoning	Mbuti.DG	-0.010585	-5.484	886	1013	11970
Mongolia_LBA_CenterWest_4	China_Miaozigou_MN	Han_Liaoning	Mbuti.DG	-0.004981	-5.46	2329	2480	30275
Mongolia_North_N	China_NEastAsia_Coastal_EN	Han_Liaoning	Mbuti.DG	-0.002412	-5.445	7301	7530	94806
Vietnam_N	Russia_MN_Boisman	Han_Liaoning	Mbuti.DG	-0.005651	-5.431	1884	2022	24496
Mongolia_EIA_Xiongnu_7	China_Shimao_LN	Han_Liaoning	Mbuti.DG	-0.003874	-5.424	5933	6231	76814
Nepal_Chokhopani_2800BP.SG	China_YR_LN	Han_Liaoning	Mbuti.DG	-0.003073	-5.409	8291	8618	106375
Nepal_Chokhopani_2800BP.SG	China_YR_LBIA	Han_Liaoning	Mbuti.DG	-0.003172	-5.362	8187	8523	105682
Vietnam_N	China_AmurRiver_LPaleolithic	Han_Liaoning	Mbuti.DG	-0.005962	-5.359	1766	1905	23227
Mongolia_EBA_Ulgii_1	China_NEastAsia_Inland_EN	Han_Liaoning	Mbuti.DG	-0.003624	-5.354	5991	6276	78774
Iran_Wezmeh_N.SG	Russia_Andronovo.SG	Han_Liaoning	Mbuti.DG	-0.003555	-5.353	8078	8454	105730
Mongolia_Arkhangai_XiongnuEarlyMedieval_2	Mongolia_EIA_Pazyryk_6	Han_Liaoning	Mbuti.DG	-0.0042	-5.331	5326	5621	70280
Japan_Jomon.SG	China_Miaozigou_MN	Han_Liaoning	Mbuti.DG	-0.007262	-5.325	1892	2072	24828
Nepal_Chokhopani_2800BP.SG	China_YR_MN	Han_Liaoning	Mbuti.DG	-0.003201	-5.317	8189	8527	105766
Mongolia_EIA_SlabGrave_1	Taiwan_Hanben_IA	Han_Liaoning	Mbuti.DG	-0.001653	-5.303	8156	8327	103120
Iran_TepeAbdulHosein_N.SG	Luxembourg_Loschbour.DG	Han_Liaoning	Mbuti.DG	-0.003586	-5.251	7133	7465	92589
Iran_Hasanlu_IA.SG	Laos_Hoabinhian.SG	Han_Liaoning	Mbuti.DG	-0.00607	-5.244	2819	3036	35773
Iran_TepeAbdulHosein_N.SG	Russia_Caucasus_EBA_Yamnaya	Han_Liaoning	Mbuti.DG	-0.00362	-5.242	5140	5387	68285
Russia_Kalmykia_EBA_Yamnaya.SG	Mongolia_Arkhangai_XiongnuEarlyMedieval_2	Han_Liaoning	Mbuti.DG	-0.003065	-5.241	6184	6437	82508
China_SEastAsia_Coastal_EN	China_Upper_YR_LN	Han_Liaoning	Mbuti.DG	-0.005624	-5.238	2419	2595	31361
Mongolia_Arkhangai_XiongnuEarlyMedieval_2	Mongolia_EIA_2	Han_Liaoning	Mbuti.DG	-0.00421	-5.23	5275	5565	69077
Mongolia_LBA_MongunTaiga_3	Vietnam_N	Han_Liaoning	Mbuti.DG	-0.005794	-5.186	1938	2080	24385
Mongolia_LBA_Khovsgol_6	Russia_EarlyMedieval_Heshui_Mohe_1	Han_Liaoning	Mbuti.DG	-0.004899	-5.175	2282	2427	29665
Mongolia_EBA_Ulgii_1	Mongolia_Bulgan_Xiongnu	Han_Liaoning	Mbuti.DG	-0.002905	-5.144	6805	7060	87693
Russia_Buryatia_Xiongnu	Taiwan_Hanben_IA	Han_Liaoning	Mbuti.DG	-0.002008	-5.144	7904	8106	100315
China_AmurRiver_LPaleolithic	China_Upper_YR_LN	Han_Liaoning	Mbuti.DG	-0.002733	-5.131	6487	6714	83174
Mongolia_LBA_Khovsgol_6	Vietnam_BA	Han_Liaoning	Mbuti.DG	-0.00455	-5.122	2564	2714	33020
Mongolia_Tuv_LatEMedieval	China_YR_LN	Han_Liaoning	Mbuti.DG	-0.002322	-5.08	7287	7504	93725
Mongolia_Tuv_LatEMedieval	China_YR_MN	Han_Liaoning	Mbuti.DG	-0.002449	-5.042	7241	7470	93309
Mongolia_Bulgan_Xiongnu	China_WLR_MN	Han_Liaoning	Mbuti.DG	-0.003105	-5.039	7190	7479	93022
Mongolia_East_N	China_YR_LN	Han_Liaoning	Mbuti.DG	-0.002479	-5.037	7244	7475	92943
China_SEastAsia_Coastal_EN	Taiwan_Hanben_IA	Han_Liaoning	Mbuti.DG	-0.00466	-5.029	2377	2524	31596
Nepal_Samdzong_1500BP.SG	China_NEastAsia_Coastal_EN	Han_Liaoning	Mbuti.DG	-0.002316	-5.015	7695	7922	98113
China_SEastAsia_Coastal_EN	China_NEastAsia_Coastal_EN	Han_Liaoning	Mbuti.DG	-0.0051	-5.003	2401	2561	31431
Vietnam_N	China_WLR_BA	Han_Liaoning	Mbuti.DG	-0.008003	-4.991	1141	1262	15155
China_AmurRiver_LPaleolithic	China_Upper_YR_IA	Han_Liaoning	Mbuti.DG	-0.002982	-4.988	6377	6620	81529
China_SEastAsia_Coastal_LN	China_YR_MN	Han_Liaoning	Mbuti.DG	-0.003057	-4.987	4953	5148	63841
Mongolia_LBA_Khovsgol_6	Mongolia_EIA_Xiongnu_7	Han_Liaoning	Mbuti.DG	-0.003028	-4.967	5957	6192	77335
Russia_MN_Boisman	China_YR_LBIA	Han_Liaoning	Mbuti.DG	-0.002117	-4.965	7370	7572	95233
Mongolia_Tuv_LatEMedieval	China_YR_LBIA	Han_Liaoning	Mbuti.DG	-0.0024	-4.962	7245	7469	93334
China_NEastAsia_Inland_EN	China_YR_LBIA	Han_Liaoning	Mbuti.DG	-0.003133	-4.95	6287	6541	81262
Russia_Kalmykia_EBA_Yamnaya.SG	Laos_Hoabinhian.SG	Han_Liaoning	Mbuti.DG	-0.004763	-4.945	3104	3291	39443
Japan_Jomon.SG	Mongolia_Bulgan_Xiongnu	Han_Liaoning	Mbuti.DG	-0.003954	-4.942	5790	6081	73625
Mongolia_EIA_Xiongnu_7	China_Upper_YR_IA	Han_Liaoning	Mbuti.DG	-0.003523	-4.942	5837	6103	75398
Hungary_LateC_EBA_Baden_Yamnaya	Russia_Afanasievo	Han_Liaoning	Mbuti.DG	-0.002452	-4.936	6203	6406	82854
China_AmurRiver_LPaleolithic	China_Shimao_LN	Han_Liaoning	Mbuti.DG	-0.002981	-4.935	6430	6678	83169
Iran_Wezmeh_N.SG	Russia_MLBA_Sintashta	Han_Liaoning	Mbuti.DG	-0.002885	-4.933	8075	8378	105135
Nepal_Chokhopani_2800BP.SG	China_Upper_YR_LN	Han_Liaoning	Mbuti.DG	-0.002923	-4.931	8168	8476	105379
China_SEastAsia_Coastal_EN	China_Shimao_LN	Han_Liaoning	Mbuti.DG	-0.005482	-4.874	2425	2597	31402
China_SEastAsia_Coastal_EN	China_WLR_LN	Han_Liaoning	Mbuti.DG	-0.005883	-4.87	2178	2345	28287
Japan_Jomon.SG	Mongolia_EIA_Xiongnu_7	Han_Liaoning	Mbuti.DG	-0.004444	-4.84	4761	5032	60932
Mongolia_East_N	China_YR_MN	Han_Liaoning	Mbuti.DG	-0.002568	-4.838	7162	7400	92535
China_NEastAsia_Inland_EN	China_YR_LN	Han_Liaoning	Mbuti.DG	-0.002965	-4.832	6308	6550	81526
Mongolia_EIA_Xiongnu_7	China_Upper_YR_LN	Han_Liaoning	Mbuti.DG	-0.003262	-4.829	5966	6216	76776
Iran_TepeAbdulHosein_N.SG	Russia_Alan.SG	Han_Liaoning	Mbuti.DG	-0.002593	-4.813	7361	7614	97782
China_SEastAsia_Coastal_EN	Russia_DevilsCave_N.SG	Han_Liaoning	Mbuti.DG	-0.005144	-4.793	2445	2608	31596
Russia_Samara_EBA_Yamnaya	Laos_Hoabinhian.SG	Han_Liaoning	Mbuti.DG	-0.004525	-4.764	3128	3307	39519
Mongolia_Bulgan_Xiongnu	Taiwan_Hanben_IA	Han_Liaoning	Mbuti.DG	-0.002297	-4.733	7388	7602	93445
Taiwan_Hanben_IA	China_YR_LBIA	Han_Liaoning	Mbuti.DG	-0.00162	-4.72	8183	8353	105256
Russia_Buryatia_Xiongnu	China_WLR_MN	Han_Liaoning	Mbuti.DG	-0.002482	-4.715	7695	7943	99862
Mongolia_LBA_CenterWest_4	Nepal_Chokhopani_2800BP.SG	Han_Liaoning	Mbuti.DG	-0.002778	-4.704	7996	8276	101036
Taiwan_Hanben_IA	China_YR_LN	Han_Liaoning	Mbuti.DG	-0.001487	-4.703	8258	8415	105901
Vietnam_N	Mongolia_Khentii_Xiongnu	Han_Liaoning	Mbuti.DG	-0.005899	-4.693	1823	1963	23726
Iran_Wezmeh_N.SG	Russia_Caucasus_EBA_Yamnaya	Han_Liaoning	Mbuti.DG	-0.003586	-4.685	5495	5755	72333
China_Xinjian_IA.SG	China_SEastAsia_Coastal_EN	Han_Liaoning	Mbuti.DG	-0.006495	-4.676	1804	1952	22723
Vietnam_N	Nepal_Samdzong_1500BP.SG	Han_Liaoning	Mbuti.DG	-0.004826	-4.66	1948	2068	24841
China_AmurRiver_LPaleolithic	China_WLR_LN	Han_Liaoning	Mbuti.DG	-0.003003	-4.618	5616	5833	72284
Vietnam_N	China_SEastAsia_Coastal_LN	Han_Liaoning	Mbuti.DG	-0.005271	-4.615	1501	1610	20536
Mongolia_EIA_SlabGrave_1	China_WLR_MN	Han_Liaoning	Mbuti.DG	-0.002116	-4.612	7893	8110	102587
Japan_Jomon.SG	China_AR_EN	Han_Liaoning	Mbuti.DG	-0.005882	-4.6	2103	2261	26888
Mongolia_North_N	Taiwan_Hanben_IA	Han_Liaoning	Mbuti.DG	-0.001719	-4.597	7813	7983	99252
Vietnam_N	Mongolia_Tuv_LatEMedieval	Han_Liaoning	Mbuti.DG	-0.004983	-4.589	1882	2003	24238
Russia_Afanasievo	Mongolia_Arkhangai_XiongnuEarlyMedieval_2	Han_Liaoning	Mbuti.DG	-0.002376	-4.573	6347	6546	84084
Mongolia_LBA_CenterWest_4	China_NEastAsia_Inland_EN	Han_Liaoning	Mbuti.DG	-0.002941	-4.551	6195	6433	80799
Japan_Jomon.SG	China_NEastAsia_Inland_EN	Han_Liaoning	Mbuti.DG	-0.004175	-4.54	5025	5293	64193
Mongolia_EIA_Xiongnu_7	China_NEastAsia_Coastal_EN	Han_Liaoning	Mbuti.DG	-0.00318	-4.535	5877	6119	76045
Mongolia_LBA_CenterWest_4	Mongolia_Bulgan_Xiongnu	Han_Liaoning	Mbuti.DG	-0.002248	-4.535	7086	7291	91410
Russia_Buryatia_Xiongnu	China_WLR_BA	Han_Liaoning	Mbuti.DG	-0.003227	-4.53	4269	4448	55500
Luxembourg_Loschbour.DG	Laos_Hoabinhian.SG	Han_Liaoning	Mbuti.DG	-0.00492	-4.51	3052	3243	38829
Mongolia_Uvs_EIAXiongnuLateMedival	Mongolia_EIA_Sagly_4	Han_Liaoning	Mbuti.DG	-0.001284	-4.508	7714	7845	102212
Iran_Wezmeh_N.SG	Russia_Kalmykia_EBA_Yamnaya.SG	Han_Liaoning	Mbuti.DG	-0.002897	-4.481	7774	8069	102027
Mongolia_Arkhangai_XiongnuEarlyMedieval_2	China_Tianyuan	Han_Liaoning	Mbuti.DG	-0.004081	-4.475	5919	6217	73003
Russia_Caucasus_EBA_Yamnaya	Laos_Hoabinhian.SG	Han_Liaoning	Mbuti.DG	-0.005599	-4.474	2138	2290	27042
Mongolia_East_N	China_WLR_LN	Han_Liaoning	Mbuti.DG	-0.002922	-4.472	6135	6366	79144
China_SEastAsia_Coastal_LN	China_YR_LBIA	Han_Liaoning	Mbuti.DG	-0.002524	-4.471	4931	5092	63860
Mongolia_EBA_Ulgii_1	Vietnam_BA	Han_Liaoning	Mbuti.DG	-0.004429	-4.467	2525	2669	32403
China_NEastAsia_Inland_EN	China_YR_MN	Han_Liaoning	Mbuti.DG	-0.002949	-4.455	6272	6512	81240
Vietnam_N	Mongolia_EIA_SlabGrave_1	Han_Liaoning	Mbuti.DG	-0.004181	-4.454	1949	2052	24802
Hungary_LateC_EBA_Baden_Yamnaya	Russia_Samara_EBA_Yamnaya	Han_Liaoning	Mbuti.DG	-0.002395	-4.43	6136	6332	82011
Mongolia_LBA_CenterWest_4	Russia_EarlyMedieval_Heshui_Mohe_1	Han_Liaoning	Mbuti.DG	-0.004219	-4.429	2283	2407	29586
China_NEastAsia_Inland_EN	China_Shimao_LN	Han_Liaoning	Mbuti.DG	-0.003087	-4.429	6211	6460	80832
Japan_Jomon.SG	Vietnam_BA	Han_Liaoning	Mbuti.DG	-0.005791	-4.422	2021	2175	26722
China_AmurRiver_N	China_YR_LBIA	Han_Liaoning	Mbuti.DG	-0.001951	-4.422	6406	6567	82650
Nepal_Samdzong_1500BP.SG	Taiwan_Hanben_IA	Han_Liaoning	Mbuti.DG	-0.001757	-4.416	8394	8580	105933
Mongolia_Arkhangai_XiongnuEarlyMedieval_2	China_AmurRiver_Paleolithic	Han_Liaoning	Mbuti.DG	-0.003939	-4.414	6529	6842	79458
Mongolia_Bulgan_Xiongnu	Russia_DevilsCave_N.SG	Han_Liaoning	Mbuti.DG	-0.00259	-4.402	7230	7473	93541
China_AmurRiver_N	China_YR_LN	Han_Liaoning	Mbuti.DG	-0.001838	-4.397	6440	6593	82937
Mongolia_EBA_Ulgii_1	China_AR_Xianbei_IA	Han_Liaoning	Mbuti.DG	-0.004626	-4.393	1873	1987	24791
Mongolia_EIA_Xiongnu_7	China_WLR_LN	Han_Liaoning	Mbuti.DG	-0.003566	-4.393	5200	5441	67550
Mongolia_Bulgan_Xiongnu	China_Miaozigou_MN	Han_Liaoning	Mbuti.DG	-0.004729	-4.389	2158	2293	28414
Mongolia_LBA_Khovsgol_6	Mongolia_LBA_CenterWest_4	Han_Liaoning	Mbuti.DG	-0.001255	-4.387	7702	7828	100490
China_SEastAsia_Coastal_EN	China_WLR_MN	Han_Liaoning	Mbuti.DG	-0.005037	-4.384	2412	2571	31490
Mongolia_North_N	China_WLR_MN	Han_Liaoning	Mbuti.DG	-0.002325	-4.382	7545	7774	98706
Iran_Wezmeh_N.SG	Luxembourg_Loschbour.DG	Han_Liaoning	Mbuti.DG	-0.003249	-4.382	7845	8170	100197
Nepal_Chokhopani_2800BP.SG	China_WLR_LN	Han_Liaoning	Mbuti.DG	-0.003216	-4.379	6806	7088	87728
Russia_Andronovo.SG	Laos_Hoabinhian.SG	Han_Liaoning	Mbuti.DG	-0.004417	-4.378	3238	3419	41088
Russia_MN_Boisman	China_YR_LN	Han_Liaoning	Mbuti.DG	-0.00178	-4.362	7446	7616	95622
Nepal_Chokhopani_2800BP.SG	China_Shimao_LN	Han_Liaoning	Mbuti.DG	-0.002817	-4.355	8180	8476	105155
Mongolia_Tuv_LatEMedieval	China_Shimao_LN	Han_Liaoning	Mbuti.DG	-0.002354	-4.333	7207	7425	92786
Mongolia_East_N	China_Upper_YR_LN	Han_Liaoning	Mbuti.DG	-0.002236	-4.325	7100	7306	92100
Russia_MN_Boisman	China_YR_MN	Han_Liaoning	Mbuti.DG	-0.001994	-4.315	7417	7607	95204
China_AmurRiver_Mesolithic	China_YR_LBIA	Han_Liaoning	Mbuti.DG	-0.002309	-4.304	5489	5653	70696
Hungary_LateC_EBA_Baden_Yamnaya	Russia_Andronovo.SG	Han_Liaoning	Mbuti.DG	-0.002529	-4.299	6137	6346	82722
Mongolia_East_N	China_Shimao_LN	Han_Liaoning	Mbuti.DG	-0.002447	-4.287	7090	7315	92024
Iran_GanjDareh_N	Ukraine_EBA_Yamnaya	Han_Liaoning	Mbuti.DG	-0.002831	-4.254	5751	5967	76158
Mongolia_Uvs_EIAXiongnuLateMedival	China_Xinjian_IA.SG	Han_Liaoning	Mbuti.DG	-0.002577	-4.253	5786	5975	73162
Taiwan_Hanben_IA	China_YR_MN	Han_Liaoning	Mbuti.DG	-0.001666	-4.252	8239	8414	105301
Vietnam_N	Mongolia_North_N	Han_Liaoning	Mbuti.DG	-0.004363	-4.247	1927	2035	24690
China_AmurRiver_N	China_YR_MN	Han_Liaoning	Mbuti.DG	-0.002139	-4.244	6424	6601	82621
Vietnam_N	Nepal_Chokhopani_2800BP.SG	Han_Liaoning	Mbuti.DG	-0.005373	-4.238	1930	2063	24784
Mongolia_EIA_Xiongnu_7	Taiwan_Hanben_IA	Han_Liaoning	Mbuti.DG	-0.002664	-4.235	6091	6297	77441
Mongolia_Tuv_LatEMedieval	China_WLR_LN	Han_Liaoning	Mbuti.DG	-0.002613	-4.227	6148	6356	79764
Mongolia_Bulgan_Xiongnu	China_WLR_BA	Han_Liaoning	Mbuti.DG	-0.003339	-4.21	4053	4228	52406
China_SEastAsia_Coastal_LN	China_YR_LN	Han_Liaoning	Mbuti.DG	-0.002299	-4.205	4986	5133	64033
Nepal_Chokhopani_2800BP.SG	China_Upper_YR_IA	Han_Liaoning	Mbuti.DG	-0.002661	-4.175	7971	8243	102268
China_SEastAsia_Coastal_EN	Russia_MN_Boisman	Han_Liaoning	Mbuti.DG	-0.004352	-4.155	2415	2551	31243
China_NEastAsia_Inland_EN	China_Upper_YR_LN	Han_Liaoning	Mbuti.DG	-0.002699	-4.151	6217	6435	80816
Mongolia_EBA_Ulgii_1	China_AR_EN	Han_Liaoning	Mbuti.DG	-0.004159	-4.138	2405	2537	31728
Ukraine_EBA_Yamnaya	Mongolia_Arkhangai_XiongnuEarlyMedieval_2	Han_Liaoning	Mbuti.DG	-0.003206	-4.137	5225	5447	69236
Vietnam_N	Nepal_Mebrak_2125BP.SG	Han_Liaoning	Mbuti.DG	-0.006611	-4.129	1365	1481	17534
China_AmurRiver_Mesolithic	China_YR_LN	Han_Liaoning	Mbuti.DG	-0.002192	-4.118	5525	5680	70900
Hungary_LateC_EBA_Baden_Yamnaya	Russia_MLBA_Sintashta	Han_Liaoning	Mbuti.DG	-0.001866	-4.098	6118	6273	82892
Mongolia_Tuv_Xiongnu	China_YR_LBIA	Han_Liaoning	Mbuti.DG	-0.002393	-4.093	7266	7492	94210
Nepal_Samdzong_1500BP.SG	China_WLR_MN	Han_Liaoning	Mbuti.DG	-0.002193	-4.091	8269	8501	105838
Mongolia_EBA_Ulgii_1	Mongolia_EIA_Xiongnu_7	Han_Liaoning	Mbuti.DG	-0.002796	-4.066	5834	6045	75526
Mongolia_LBA_CenterWest_5	China_Xinjian_IA.SG	Han_Liaoning	Mbuti.DG	-0.003033	-4.063	5539	5750	69843
China_AmurRiver_LPaleolithic	China_NEastAsia_Coastal_EN	Han_Liaoning	Mbuti.DG	-0.002114	-4.062	6336	6510	82166
China_Xinjian_IA.SG	Vietnam_N	Han_Liaoning	Mbuti.DG	-0.005755	-4.036	1430	1534	18103
Ukraine_EBA_Yamnaya	Laos_Hoabinhian.SG	Han_Liaoning	Mbuti.DG	-0.005261	-4.036	2233	2384	28658
Mongolia_Tuv_Xiongnu	China_YR_LN	Han_Liaoning	Mbuti.DG	-0.002243	-4.033	7358	7570	94663
Mongolia_East_N	China_Upper_YR_IA	Han_Liaoning	Mbuti.DG	-0.002269	-4.031	6974	7178	90034
Mongolia_Tuv_Xiongnu	China_WLR_LN	Han_Liaoning	Mbuti.DG	-0.002784	-4.007	6134	6357	79961
Mongolia_EIA_Xiongnu_7	Russia_DevilsCave_N.SG	Han_Liaoning	Mbuti.DG	-0.002779	-3.994	5956	6171	77446
Russia_Buryatia_Xiongnu	Russia_MN_Boisman	Han_Liaoning	Mbuti.DG	-0.001659	-3.979	7126	7280	93142
Mongolia_North_N	China_Miaozigou_MN	Han_Liaoning	Mbuti.DG	-0.003687	-3.974	2285	2395	29923
Mongolia_Bulgan_Xiongnu	Taiwan_Gongguan	Han_Liaoning	Mbuti.DG	-0.003045	-3.961	4987	5181	63721
Hungary_LateC_EBA_Baden_Yamnaya	Luxembourg_Loschbour.DG	Han_Liaoning	Mbuti.DG	-0.002671	-3.956	5794	6005	78698
Vietnam_N	Russia_Buryatia_Xiongnu	Han_Liaoning	Mbuti.DG	-0.003945	-3.937	1946	2043	24676
Russia_Buryatia_Xiongnu	Russia_DevilsCave_N.SG	Han_Liaoning	Mbuti.DG	-0.001935	-3.932	7729	7924	100486
Mongolia_EIA_SlabGrave_1	China_WLR_BA	Han_Liaoning	Mbuti.DG	-0.002596	-3.924	4360	4506	56610
China_SEastAsia_Coastal_LN	China_Shimao_LN	Han_Liaoning	Mbuti.DG	-0.00271	-3.921	4926	5098	63549
China_SEastAsia_Coastal_EN	China_AmurRiver_Mesolithic	Han_Liaoning	Mbuti.DG	-0.004466	-3.905	2164	2291	28353
China_NEastAsia_Inland_EN	China_WLR_LN	Han_Liaoning	Mbuti.DG	-0.003078	-3.887	5475	5694	71002
Mongolia_LBA_CenterWest_4	China_AR_EN	Han_Liaoning	Mbuti.DG	-0.003391	-3.861	2523	2635	33130
Mongolia_Arkhangai_XiongnuEarlyMedieval_2	Mongolia_Arkhangai_Xiongnu	Han_Liaoning	Mbuti.DG	-0.002206	-3.843	6476	6661	83643
Mongolia_EIA_Xiongnu_7	Taiwan_Gongguan	Han_Liaoning	Mbuti.DG	-0.00345	-3.824	4614	4817	58955
China_SEastAsia_Coastal_EN	Mongolia_Tuv_Xiongnu	Han_Liaoning	Mbuti.DG	-0.004573	-3.817	2391	2531	30755
Iran_Wezmeh_N.SG	Russia_Alan.SG	Han_Liaoning	Mbuti.DG	-0.002386	-3.808	8072	8325	105900
Laos_Hoabinhian.SG	China_Xinjian_IA.SG	Han_Liaoning	Mbuti.DG	-0.004562	-3.803	2356	2492	29782
China_AmurRiver_LPaleolithic	China_WLR_BA	Han_Liaoning	Mbuti.DG	-0.00312	-3.786	3687	3836	47923
China_AmurRiver_Mesolithic	China_YR_MN	Han_Liaoning	Mbuti.DG	-0.002403	-3.774	5516	5685	70652
Mongolia_LBA_CenterWest_4	Vietnam_BA	Han_Liaoning	Mbuti.DG	-0.003428	-3.762	2575	2688	32905
China_SEastAsia_Coastal_LN	China_Upper_YR_IA	Han_Liaoning	Mbuti.DG	-0.002567	-3.759	4832	4993	62343
China_NEastAsia_Inland_EN	China_Upper_YR_IA	Han_Liaoning	Mbuti.DG	-0.002649	-3.749	6158	6368	79255
China_SEastAsia_Coastal_EN	China_AmurRiver_N	Han_Liaoning	Mbuti.DG	-0.003897	-3.74	2313	2430	30100
Russia_Samara_EBA_Yamnaya	Mongolia_Arkhangai_XiongnuEarlyMedieval_2	Han_Liaoning	Mbuti.DG	-0.002072	-3.738	6313	6485	83152
Mongolia_EIA_Xiongnu_7	China_WLR_MN	Han_Liaoning	Mbuti.DG	-0.002876	-3.731	5958	6180	77082
Mongolia_Tuv_LatEMedieval	China_Upper_YR_LN	Han_Liaoning	Mbuti.DG	-0.001893	-3.729	7234	7410	92881
China_SEastAsia_Coastal_EN	China_SEastAsia_Coastal_LN	Han_Liaoning	Mbuti.DG	-0.004184	-3.723	1989	2102	27110
Mongolia_EIA_SlabGrave_1	Russia_DevilsCave_N.SG	Han_Liaoning	Mbuti.DG	-0.001607	-3.719	7984	8150	103279
Nepal_Samdzong_1500BP.SG	China_WLR_BA	Han_Liaoning	Mbuti.DG	-0.002697	-3.708	4466	4621	57535
Mongolia_EBA_Ulgii_1	Russia_EarlyMedieval_Heshui_Mohe_1	Han_Liaoning	Mbuti.DG	-0.003963	-3.694	2267	2383	29276
Mongolia_Tuv_Xiongnu	China_Upper_YR_LN	Han_Liaoning	Mbuti.DG	-0.002111	-3.686	7257	7455	93804
Vietnam_N	Mongolia_East_N	Han_Liaoning	Mbuti.DG	-0.004249	-3.666	1888	1991	24228
China_AR_Xianbei_IA	China_YR_MN	Han_Liaoning	Mbuti.DG	-0.003857	-3.648	2065	2169	26730
China_SEastAsia_Coastal_LN	China_WLR_LN	Han_Liaoning	Mbuti.DG	-0.002693	-3.643	4337	4488	56197
Mongolia_Khentii_Xiongnu	China_YR_LBIA	Han_Liaoning	Mbuti.DG	-0.002172	-3.642	6767	6957	87163
Russia_Caucasus_EBA_Yamnaya	Mongolia_Arkhangai_XiongnuEarlyMedieval_2	Han_Liaoning	Mbuti.DG	-0.002558	-3.639	4957	5125	65848
Japan_Jomon.SG	China_AR_Xianbei_IA	Han_Liaoning	Mbuti.DG	-0.005074	-3.636	1653	1760	21141
China_SEastAsia_Coastal_EN	China_AmurRiver_EarlyN	Han_Liaoning	Mbuti.DG	-0.004235	-3.636	2257	2380	29104
China_AmurRiver_Paleolithic	China_Xinjian_IA.SG	Han_Liaoning	Mbuti.DG	-0.003399	-3.634	5393	5617	66011
Laos_Hoabinhian.SG	Mongolia_EIA_Sagly_4	Han_Liaoning	Mbuti.DG	-0.003136	-3.607	3208	3334	40186
Russia_Buryatia_Xiongnu	China_AmurRiver_N	Han_Liaoning	Mbuti.DG	-0.001662	-3.605	6240	6376	81426
Russia_Buryatia_Xiongnu	Taiwan_Gongguan	Han_Liaoning	Mbuti.DG	-0.002545	-3.598	5192	5360	65921
Japan_Jomon.SG	Russia_EarlyMedieval_Heshui_Mohe_1	Han_Liaoning	Mbuti.DG	-0.00515	-3.593	1828	1948	23441
Mongolia_North_N	Russia_DevilsCave_N.SG	Han_Liaoning	Mbuti.DG	-0.001783	-3.591	7620	7797	99308
Russia_MN_Boisman	China_Shimao_LN	Han_Liaoning	Mbuti.DG	-0.001846	-3.588	7374	7548	94679
China_AmurRiver_LPaleolithic	Taiwan_Hanben_IA	Han_Liaoning	Mbuti.DG	-0.001713	-3.574	6579	6723	83879
China_AmurRiver_Mesolithic	China_WLR_LN	Han_Liaoning	Mbuti.DG	-0.002525	-3.567	4832	4989	62107
China_SEastAsia_Coastal_EN	China_WLR_BA	Han_Liaoning	Mbuti.DG	-0.005584	-3.558	1464	1569	18927
Japan_Jomon.SG	Mongolia_LBA_CenterWest_4	Han_Liaoning	Mbuti.DG	-0.002404	-3.558	6354	6545	79395
Iran_TepeAbdulHosein_N.SG	Ukraine_EBA_Yamnaya	Han_Liaoning	Mbuti.DG	-0.002691	-3.554	5462	5657	72510
Mongolia_Tuv_Xiongnu	China_YR_MN	Han_Liaoning	Mbuti.DG	-0.002193	-3.554	7295	7502	94217
Russia_MN_Boisman	China_WLR_LN	Han_Liaoning	Mbuti.DG	-0.002011	-3.528	6272	6436	81212
China_AmurRiver_LPaleolithic	China_WLR_MN	Han_Liaoning	Mbuti.DG	-0.002187	-3.528	6480	6662	83474
Russia_DevilsCave_N.SG	China_YR_LBIA	Han_Liaoning	Mbuti.DG	-0.001642	-3.528	8211	8385	105864
Mongolia_EIA_SlabGrave_1	China_AmurRiver_N	Han_Liaoning	Mbuti.DG	-0.001321	-3.527	6312	6421	82502
China_SEastAsia_Coastal_LN	China_Upper_YR_LN	Han_Liaoning	Mbuti.DG	-0.002194	-3.503	4969	5108	63486
Mongolia_LBA_CenterWest_4	China_AR_Xianbei_IA	Han_Liaoning	Mbuti.DG	-0.003338	-3.494	1991	2078	25938
Mongolia_EIA_Xiongnu_7	Russia_MN_Boisman	Han_Liaoning	Mbuti.DG	-0.002244	-3.487	5812	5982	75695
Mongolia_Arkhangai_Xiongnu	Mongolia_LBA_CenterWest_5	Han_Liaoning	Mbuti.DG	-0.001975	-3.485	7575	7767	97284
Russia_Buryatia_Xiongnu	China_AmurRiver_EarlyN	Han_Liaoning	Mbuti.DG	-0.002068	-3.484	5662	5815	74164
China_NEastAsia_Inland_EN	China_NEastAsia_Coastal_EN	Han_Liaoning	Mbuti.DG	-0.002286	-3.477	6105	6288	79864
Vietnam_N	Mongolia_Tuv_Xiongnu	Han_Liaoning	Mbuti.DG	-0.0042	-3.471	1880	1981	24067
Hungary_LateC_EBA_Baden_Yamnaya	Russia_Caucasus_EBA_Yamnaya	Han_Liaoning	Mbuti.DG	-0.002235	-3.46	4925	5072	65743
Mongolia_North_N	Russia_MN_Boisman	Han_Liaoning	Mbuti.DG	-0.001428	-3.448	7102	7235	93302
Russia_Andronovo.SG	Mongolia_Arkhangai_XiongnuEarlyMedieval_2	Han_Liaoning	Mbuti.DG	-0.00202	-3.436	6341	6511	84038
Mongolia_Tuv_LatEMedieval	China_Upper_YR_IA	Han_Liaoning	Mbuti.DG	-0.001861	-3.428	7063	7232	90715
Iran_Hasanlu_IA.SG	Russia_Samara_EBA_Yamnaya	Han_Liaoning	Mbuti.DG	-0.002193	-3.425	6661	6855	88531
China_SEastAsia_Coastal_EN	Mongolia_East_N	Han_Liaoning	Mbuti.DG	-0.003826	-3.422	2404	2523	30916
Mongolia_EIA_Xiongnu_7	China_AmurRiver_EarlyN	Han_Liaoning	Mbuti.DG	-0.002719	-3.422	4936	5113	64980
Mongolia_EIA_Xiongnu_7	China_WLR_BA	Han_Liaoning	Mbuti.DG	-0.003424	-3.417	3448	3602	44787
Mongolia_EIA_Xiongnu_7	China_Miaozigou_MN	Han_Liaoning	Mbuti.DG	-0.00433	-3.411	1870	1976	24293
Nepal_Samdzong_1500BP.SG	Russia_DevilsCave_N.SG	Han_Liaoning	Mbuti.DG	-0.001768	-3.402	8365	8554	106638
China_SEastAsia_Coastal_EN	Mongolia_Tuv_LatEMedieval	Han_Liaoning	Mbuti.DG	-0.003665	-3.391	2415	2528	30945
Nepal_Chokhopani_2800BP.SG	China_NEastAsia_Coastal_EN	Han_Liaoning	Mbuti.DG	-0.002152	-3.379	7733	7943	97935
Vietnam_BA	China_YR_MN	Han_Liaoning	Mbuti.DG	-0.003247	-3.376	2523	2630	32987
Nepal_Samdzong_1500BP.SG	Taiwan_Gongguan	Han_Liaoning	Mbuti.DG	-0.002377	-3.369	5242	5400	66586
Iran_Hasanlu_IA.SG	Russia_Afanasievo	Han_Liaoning	Mbuti.DG	-0.002019	-3.348	6829	7011	90458
Mongolia_Bulgan_Xiongnu	Russia_MN_Boisman	Han_Liaoning	Mbuti.DG	-0.001815	-3.339	6820	6980	87894
Mongolia_North_N	China_WLR_BA	Han_Liaoning	Mbuti.DG	-0.002331	-3.336	4244	4373	55226
Mongolia_North_N	Taiwan_Gongguan	Han_Liaoning	Mbuti.DG	-0.002308	-3.333	5194	5347	66085
Taiwan_Hanben_IA	China_Upper_YR_LN	Han_Liaoning	Mbuti.DG	-0.001284	-3.319	8251	8385	104889
Mongolia_Khentii_Xiongnu	China_YR_MN	Han_Liaoning	Mbuti.DG	-0.002123	-3.308	6746	6931	87131
Taiwan_Hanben_IA	China_WLR_LN	Han_Liaoning	Mbuti.DG	-0.001679	-3.289	6824	6971	87664
Mongolia_LBA_CenterWest_5	Mongolia_EIA_Sagly_4	Han_Liaoning	Mbuti.DG	-0.001652	-3.287	7662	7824	97964
Mongolia_EIA_SlabGrave_1	Russia_MN_Boisman	Han_Liaoning	Mbuti.DG	-0.001159	-3.285	7287	7397	94976
China_AmurRiver_N	China_Upper_YR_IA	Han_Liaoning	Mbuti.DG	-0.001758	-3.274	6289	6431	80619
Mongolia_EIA_SlabGrave_1	Taiwan_Gongguan	Han_Liaoning	Mbuti.DG	-0.002085	-3.268	5252	5390	66478
China_SEastAsia_Coastal_EN	Taiwan_Gongguan	Han_Liaoning	Mbuti.DG	-0.004233	-3.267	2035	2149	26935
China_SEastAsia_Coastal_EN	Mongolia_Khentii_Xiongnu	Han_Liaoning	Mbuti.DG	-0.00408	-3.255	2343	2467	30387
Mongolia_EIA_2	China_Xinjian_IA.SG	Han_Liaoning	Mbuti.DG	-0.003035	-3.254	4276	4442	54620
Vietnam_N	Mongolia_EIA_Xiongnu_7	Han_Liaoning	Mbuti.DG	-0.004318	-3.252	1754	1852	22738
China_AmurRiver_Mesolithic	China_Shimao_LN	Han_Liaoning	Mbuti.DG	-0.002116	-3.237	5497	5646	70350
Mongolia_EIA_Xiongnu_7	China_AmurRiver_N	Han_Liaoning	Mbuti.DG	-0.002226	-3.232	5345	5500	69711
China_NEastAsia_Inland_EN	China_WLR_BA	Han_Liaoning	Mbuti.DG	-0.002953	-3.22	3587	3725	46947
Mongolia_Khentii_Xiongnu	China_WLR_LN	Han_Liaoning	Mbuti.DG	-0.002491	-3.22	5798	5984	74957
Mongolia_Bulgan_Xiongnu	China_AmurRiver_N	Han_Liaoning	Mbuti.DG	-0.001868	-3.21	6007	6152	77603
Russia_DevilsCave_N.SG	China_YR_LN	Han_Liaoning	Mbuti.DG	-0.00149	-3.207	8311	8470	106556
Mongolia_Tuv_Xiongnu	China_Upper_YR_IA	Han_Liaoning	Mbuti.DG	-0.001999	-3.201	7111	7294	91545
Mongolia_East_N	China_WLR_MN	Han_Liaoning	Mbuti.DG	-0.001897	-3.182	7046	7222	92416
Russia_MN_Boisman	China_Upper_YR_LN	Han_Liaoning	Mbuti.DG	-0.001432	-3.17	7384	7520	94743
China_AR_Xianbei_IA	China_YR_LN	Han_Liaoning	Mbuti.DG	-0.002982	-3.169	2092	2172	26858
China_NEastAsia_Inland_EN	China_WLR_MN	Han_Liaoning	Mbuti.DG	-0.002261	-3.159	6191	6374	81137
Mongolia_Khentii_Xiongnu	China_YR_LN	Han_Liaoning	Mbuti.DG	-0.001858	-3.154	6813	6976	87491
Mongolia_LBA_CenterWest_4	Mongolia_EIA_Xiongnu_7	Han_Liaoning	Mbuti.DG	-0.001972	-3.142	5949	6101	76992
China_SEastAsia_Coastal_EN	Mongolia_EIA_SlabGrave_1	Han_Liaoning	Mbuti.DG	-0.003066	-3.141	2481	2578	31556
China_AmurRiver_N	China_Upper_YR_LN	Han_Liaoning	Mbuti.DG	-0.001486	-3.138	6386	6508	82190
China_SEastAsia_Coastal_EN	Nepal_Mebrak_2125BP.SG	Han_Liaoning	Mbuti.DG	-0.004542	-3.133	1715	1815	21988
Laos_Hoabinhian.SG	Mongolia_LBA_MongunTaiga_3	Han_Liaoning	Mbuti.DG	-0.003202	-3.13	2878	2993	35944
China_AmurRiver_N	China_Shimao_LN	Han_Liaoning	Mbuti.DG	-0.001754	-3.126	6378	6523	82194
China_SEastAsia_Coastal_EN	Russia_Buryatia_Xiongnu	Han_Liaoning	Mbuti.DG	-0.003214	-3.114	2487	2588	31427
Iran_Wezmeh_N.SG	Ukraine_EBA_Yamnaya	Han_Liaoning	Mbuti.DG	-0.002684	-3.109	5917	6124	77054
Russia_DevilsCave_N.SG	China_YR_MN	Han_Liaoning	Mbuti.DG	-0.00163	-3.101	8274	8447	105944
Mongolia_Tuv_Xiongnu	China_Shimao_LN	Han_Liaoning	Mbuti.DG	-0.002076	-3.092	7270	7464	93698
Hungary_LateC_EBA_Baden_Yamnaya	Russia_Kalmykia_EBA_Yamnaya.SG	Han_Liaoning	Mbuti.DG	-0.001776	-3.088	6124	6268	81316
Mongolia_North_N	China_AmurRiver_N	Han_Liaoning	Mbuti.DG	-0.001393	-3.085	6222	6335	81568
China_AmurRiver_Mesolithic	China_Upper_YR_LN	Han_Liaoning	Mbuti.DG	-0.001767	-3.074	5465	5589	70270
Russia_MN_Boisman	China_Upper_YR_IA	Han_Liaoning	Mbuti.DG	-0.001525	-3.069	7237	7379	92599
Vietnam_N	China_NEastAsia_Inland_EN	Han_Liaoning	Mbuti.DG	-0.004121	-3.067	1807	1902	23019
Vietnam_BA	China_Upper_YR_IA	Han_Liaoning	Mbuti.DG	-0.002957	-3.065	2475	2570	32265
Russia_Buryatia_Xiongnu	China_Miaozigou_MN	Han_Liaoning	Mbuti.DG	-0.002807	-3.06	2321	2405	30063
China_AR_EN	China_Upper_YR_LN	Han_Liaoning	Mbuti.DG	-0.00285	-3.058	2593	2689	33868
Luxembourg_Loschbour.DG	Mongolia_Arkhangai_XiongnuEarlyMedieval_2	Han_Liaoning	Mbuti.DG	-0.002107	-3.045	6164	6332	79901
Nepal_Chokhopani_2800BP.SG	China_WLR_MN	Han_Liaoning	Mbuti.DG	-0.002004	-3.032	8277	8489	105668
China_SEastAsia_Coastal_EN	Mongolia_North_N	Han_Liaoning	Mbuti.DG	-0.003118	-3.021	2463	2561	31452
Vietnam_N	Russia_EarlyMedieval_Heshui_Mohe_1	Han_Liaoning	Mbuti.DG	-0.006271	-3.019	767	830	10016
Vietnam_BA	China_YR_LN	Han_Liaoning	Mbuti.DG	-0.002621	-3.012	2560	2647	33069
Nepal_Samdzong_1500BP.SG	China_AmurRiver_N	Han_Liaoning	Mbuti.DG	-0.001534	-3.003	6534	6662	82920
Nepal_Samdzong_1500BP.SG	Russia_MN_Boisman	Han_Liaoning	Mbuti.DG	-0.001401	-3.003	7528	7662	95602
