# Supplementary material for: Genetic structure and demographic history of Northern Han people in Liaoning Province inferred from genome-wide array data
Source: Frontiers journal article supplement (doi:10.3389/fevo.2022.1014024), 2022-11-03
Supplement: Table_7.XLSX [file Table_7.XLSX]

## Sheet: A
Supplementary Table 7A: The results of f4-statistics in the form of f4 (Manchu_Liaoning, Han_Liaoning; Modern population, Mbuti) based on HO merged dataset
Pop1 (W)	Pop2 (X)	Pop3 (Y)	Pop4 (Z)	D-stat	Z	BABA	ABBA	SNPs
Manchu_Liaoning	Han_Liaoning	Li	Mbuti	-0.000186	-1.939	3207	3215	41137
Manchu_Liaoning	Han_Liaoning	Even	Mbuti	-0.00013	-1.504	3146	3151	41181
Manchu_Liaoning	Han_Liaoning	Bonan	Mbuti	-0.000118	-1.369	3196	3201	41137
Manchu_Liaoning	Han_Liaoning	Tibetan_Shannan	Mbuti	-0.00012	-1.355	3197	3202	41137
Manchu_Liaoning	Han_Liaoning	Qiang_Daofu	Mbuti	-0.000117	-1.324	3207	3212	41137
Manchu_Liaoning	Han_Liaoning	Tibetan_Xunhua	Mbuti	-0.000121	-1.269	3199	3204	41137
Manchu_Liaoning	Han_Liaoning	Han_Chongqing	Mbuti	-0.000126	-1.256	3214	3219	41137
Manchu_Liaoning	Han_Liaoning	Han_Shandong	Mbuti	-0.00011	-1.252	3215	3219	41137
Manchu_Liaoning	Han_Liaoning	Han_Henan	Mbuti	-0.00011	-1.212	3216	3221	41137
Manchu_Liaoning	Han_Liaoning	Tibetan_Xinlong	Mbuti	-0.000103	-1.2	3209	3213	41137
Manchu_Liaoning	Han_Liaoning	Tu	Mbuti	-0.000102	-1.189	3197	3201	41181
Manchu_Liaoning	Han_Liaoning	Han_Sichuan	Mbuti	-0.000102	-1.148	3208	3213	41137
Manchu_Liaoning	Han_Liaoning	Kyrgyz_China	Mbuti	-9.3e-05	-1.133	3139	3142	41137
Manchu_Liaoning	Han_Liaoning	Han_Shanxi	Mbuti	-0.000101	-1.122	3213	3217	41137
Manchu_Liaoning	Han_Liaoning	Kazakh	Mbuti	-8.8e-05	-1.106	3130	3133	41076
Manchu_Liaoning	Han_Liaoning	Japanese	Mbuti	-9.1e-05	-1.083	3212	3216	41181
Manchu_Liaoning	Han_Liaoning	CHB.SG	Mbuti	-9e-05	-1.068	3225	3228	41181
Manchu_Liaoning	Han_Liaoning	Tibetan_Nagqu	Mbuti	-9.4e-05	-1.057	3199	3203	41137
Manchu_Liaoning	Han_Liaoning	Maonan	Mbuti	-9.3e-05	-1.056	3208	3212	41137
Manchu_Liaoning	Han_Liaoning	Korean	Mbuti	-9e-05	-0.978	3215	3219	41181
Manchu_Liaoning	Han_Liaoning	Sherpa	Mbuti	-9.2e-05	-0.977	3193	3197	41137
Manchu_Liaoning	Han_Liaoning	Han_Fujian	Mbuti	-9.1e-05	-0.963	3220	3224	41137
Manchu_Liaoning	Han_Liaoning	Qiang_Danba	Mbuti	-8.7e-05	-0.963	3210	3214	41137
Manchu_Liaoning	Han_Liaoning	Ulchi	Mbuti	-8.3e-05	-0.93	3203	3206	41181
Manchu_Liaoning	Han_Liaoning	Evenk_FarEast	Mbuti	-8.3e-05	-0.92	3165	3169	41076
Manchu_Liaoning	Han_Liaoning	Dongxiang	Mbuti	-8.2e-05	-0.916	3186	3190	41137
Manchu_Liaoning	Han_Liaoning	Han_Hubei	Mbuti	-8.5e-05	-0.908	3219	3222	41137
Manchu_Liaoning	Han_Liaoning	Xibo	Mbuti	-7.9e-05	-0.891	3208	3211	41181
Manchu_Liaoning	Han_Liaoning	Mongolian_FX	Mbuti	-7.3e-05	-0.879	3207	3210	41181
Manchu_Liaoning	Han_Liaoning	Tibetan_Chamdo	Mbuti	-7.6e-05	-0.872	3196	3200	41137
Manchu_Liaoning	Han_Liaoning	Dong_Guizhou	Mbuti	-7.8e-05	-0.86	3212	3216	41137
Manchu_Liaoning	Han_Liaoning	Tibetan_Shigatse	Mbuti	-7.5e-05	-0.856	3196	3199	41137
Manchu_Liaoning	Han_Liaoning	Daur	Mbuti	-7.7e-05	-0.854	3205	3208	41181
Manchu_Liaoning	Han_Liaoning	Miao	Mbuti	-7.5e-05	-0.843	3216	3219	41181
Manchu_Liaoning	Han_Liaoning	Zhuang	Mbuti	-7.3e-05	-0.827	3205	3208	41137
Manchu_Liaoning	Han_Liaoning	Gelao	Mbuti	-7.3e-05	-0.817	3206	3209	41137
Manchu_Liaoning	Han_Liaoning	Atayal	Mbuti	-7.7e-05	-0.815	3201	3204	41181
Manchu_Liaoning	Han_Liaoning	Nanai	Mbuti	-7.4e-05	-0.809	3196	3199	41076
Manchu_Liaoning	Han_Liaoning	Tibetan_Yunnan	Mbuti	-7.8e-05	-0.804	3206	3209	41137
Manchu_Liaoning	Han_Liaoning	Evenk_Transbaikal	Mbuti	-7.5e-05	-0.793	3179	3182	41076
Manchu_Liaoning	Han_Liaoning	Han_Zhejiang	Mbuti	-7.4e-05	-0.789	3215	3218	41137
Manchu_Liaoning	Han_Liaoning	Uzbek	Mbuti	-6e-05	-0.785	3088	3091	41181
Manchu_Liaoning	Han_Liaoning	CHS.SG	Mbuti	-6.4e-05	-0.766	3224	3227	41181
Manchu_Liaoning	Han_Liaoning	Oroqen	Mbuti	-6.3e-05	-0.702	3205	3207	41181
Manchu_Liaoning	Han_Liaoning	Han_HGDP	Mbuti	-5.8e-05	-0.681	3214	3217	41181
Manchu_Liaoning	Han_Liaoning	Ami	Mbuti	-6.2e-05	-0.672	3209	3212	41181
Manchu_Liaoning	Han_Liaoning	She	Mbuti	-5.8e-05	-0.647	3219	3222	41181
Manchu_Liaoning	Han_Liaoning	Yugur	Mbuti	-5.5e-05	-0.646	3204	3207	41137
Manchu_Liaoning	Han_Liaoning	Dong_Hunan	Mbuti	-5.7e-05	-0.628	3213	3215	41137
Manchu_Liaoning	Han_Liaoning	Yakut	Mbuti	-5.2e-05	-0.605	3182	3184	41181
Manchu_Liaoning	Han_Liaoning	Tibetan_Lhasa	Mbuti	-5.3e-05	-0.604	3196	3198	41137
Manchu_Liaoning	Han_Liaoning	Hezhen	Mbuti	-5.1e-05	-0.562	3206	3208	41181
Manchu_Liaoning	Han_Liaoning	Yi	Mbuti	-4.9e-05	-0.555	3210	3212	41181
Manchu_Liaoning	Han_Liaoning	Mulam	Mbuti	-4.9e-05	-0.554	3207	3209	41137
Manchu_Liaoning	Han_Liaoning	Tibetan_Yajiang	Mbuti	-4.7e-05	-0.533	3203	3205	41137
Manchu_Liaoning	Han_Liaoning	Mongola	Mbuti	-4.4e-05	-0.497	3206	3208	41181
Manchu_Liaoning	Han_Liaoning	Buryat	Mbuti	-4.2e-05	-0.496	3174	3176	41076
Manchu_Liaoning	Han_Liaoning	China_Lahu	Mbuti	-4.5e-05	-0.485	3200	3202	41181
Manchu_Liaoning	Han_Liaoning	Han_Jiangsu	Mbuti	-4.4e-05	-0.484	3216	3218	41137
Manchu_Liaoning	Han_Liaoning	Naxi	Mbuti	-4.3e-05	-0.484	3213	3215	41181
Manchu_Liaoning	Han_Liaoning	Tajik	Mbuti	-3.6e-05	-0.473	3048	3050	41181
Manchu_Liaoning	Han_Liaoning	Salar	Mbuti	-3.7e-05	-0.442	3183	3185	41137
Manchu_Liaoning	Han_Liaoning	Tibetan_Gangcha	Mbuti	-3.2e-05	-0.383	3192	3194	41137
Manchu_Liaoning	Han_Liaoning	Russian	Mbuti	-2.9e-05	-0.358	3038	3039	41181
Manchu_Liaoning	Han_Liaoning	Kazakh_China	Mbuti	-2.7e-05	-0.324	3154	3155	41137
Manchu_Liaoning	Han_Liaoning	Turkish	Mbuti	-1.8e-05	-0.23	3026	3027	41181
Manchu_Liaoning	Han_Liaoning	Dai	Mbuti	-1.9e-05	-0.212	3203	3204	41181
Manchu_Liaoning	Han_Liaoning	Han_Guangdong	Mbuti	-1.8e-05	-0.191	3214	3215	41137
Manchu_Liaoning	Han_Liaoning	French	Mbuti	-1.1e-05	-0.134	3025	3026	41181
Manchu_Liaoning	Han_Liaoning	English	Mbuti	-9e-06	-0.104	3026	3026	41181
Manchu_Liaoning	Han_Liaoning	Uyghur	Mbuti	-6e-06	-0.073	3119	3119	41181
Manchu_Liaoning	Han_Liaoning	Tibetan_Gannan	Mbuti	-4e-06	-0.048	3198	3198	41137
Manchu_Liaoning	Han_Liaoning	Spanish	Mbuti	-3e-06	-0.04	3019	3019	41181
Manchu_Liaoning	Han_Liaoning	Han_Shanghai	Mbuti	2e-05	0.18	3230	3229	41137
Manchu_Liaoning	Han_Liaoning	Iranian	Mbuti	1.9e-05	0.247	3014	3013	41181

## Sheet: B
Supplementary Table 7B: The results of f4-statistics in the form of f4 (Mongolian_Fuxin, Han_Liaoning; Modern population, Mbuti) based on HO merged dataset
Pop1 (W)	Pop2 (X)	Pop3 (Y)	Pop4 (Z)	D-stat	Z	BABA	ABBA	SNPs
Mongolian_FX	Han_Liaoning	Han_HGDP	Mbuti	-0.001296	-10.802	3203	3257	41191
Mongolian_FX	Han_Liaoning	CHS.SG	Mbuti	-0.001298	-10.752	3213	3267	41191
Mongolian_FX	Han_Liaoning	Mulam	Mbuti	-0.001323	-10.742	3195	3250	41147
Mongolian_FX	Han_Liaoning	Dai	Mbuti	-0.001332	-10.721	3190	3245	41191
Mongolian_FX	Han_Liaoning	Han_Fujian	Mbuti	-0.001389	-10.695	3208	3265	41147
Mongolian_FX	Han_Liaoning	Han_Zhejiang	Mbuti	-0.001376	-10.593	3203	3260	41147
Mongolian_FX	Han_Liaoning	CHB.SG	Mbuti	-0.001255	-10.522	3216	3267	41191
Mongolian_FX	Han_Liaoning	Han_Shandong	Mbuti	-0.001308	-10.48	3205	3259	41147
Mongolian_FX	Han_Liaoning	Manchu_Liaoning	Mbuti	-0.001249	-10.449	3207	3259	41181
Mongolian_FX	Han_Liaoning	Zhuang	Mbuti	-0.001281	-10.414	3194	3247	41147
Mongolian_FX	Han_Liaoning	Han_Jiangsu	Mbuti	-0.001317	-10.41	3205	3259	41147
Mongolian_FX	Han_Liaoning	Li	Mbuti	-0.001384	-10.351	3197	3254	41147
Mongolian_FX	Han_Liaoning	Maonan	Mbuti	-0.001287	-10.318	3198	3251	41147
Mongolian_FX	Han_Liaoning	She	Mbuti	-0.001317	-10.29	3208	3262	41191
Mongolian_FX	Han_Liaoning	Gelao	Mbuti	-0.001298	-10.199	3196	3249	41147
Mongolian_FX	Han_Liaoning	Ami	Mbuti	-0.001352	-10.157	3197	3253	41191
Mongolian_FX	Han_Liaoning	Han_Guangdong	Mbuti	-0.001302	-10.152	3203	3256	41147
Mongolian_FX	Han_Liaoning	Dong_Guizhou	Mbuti	-0.001292	-10.152	3202	3255	41147
Mongolian_FX	Han_Liaoning	Miao	Mbuti	-0.00127	-10.108	3206	3258	41191
Mongolian_FX	Han_Liaoning	Han_Hubei	Mbuti	-0.001361	-9.956	3207	3263	41147
Mongolian_FX	Han_Liaoning	Atayal	Mbuti	-0.001369	-9.903	3189	3245	41191
Mongolian_FX	Han_Liaoning	Dong_Hunan	Mbuti	-0.001289	-9.895	3202	3255	41147
Mongolian_FX	Han_Liaoning	Han_Sichuan	Mbuti	-0.001248	-9.704	3200	3251	41147
Mongolian_FX	Han_Liaoning	Han_Shanxi	Mbuti	-0.001178	-9.448	3206	3255	41147
Mongolian_FX	Han_Liaoning	Han_Chongqing	Mbuti	-0.001288	-9.332	3205	3258	41147
Mongolian_FX	Han_Liaoning	China_Lahu	Mbuti	-0.001188	-9.222	3191	3240	41191
Mongolian_FX	Han_Liaoning	Qiang_Danba	Mbuti	-0.00114	-9.015	3203	3250	41147
Mongolian_FX	Han_Liaoning	Tibetan_Xinlong	Mbuti	-0.001116	-8.985	3203	3249	41147
Mongolian_FX	Han_Liaoning	Han_Henan	Mbuti	-0.001144	-8.868	3210	3257	41147
Mongolian_FX	Han_Liaoning	Yugur	Mbuti	-0.001016	-8.7	3200	3242	41147
Mongolian_FX	Han_Liaoning	Japanese	Mbuti	-0.001032	-8.612	3208	3251	41191
Mongolian_FX	Han_Liaoning	Korean	Mbuti	-0.001082	-8.55	3210	3255	41191
Mongolian_FX	Han_Liaoning	Yi	Mbuti	-0.001041	-8.301	3205	3247	41191
Mongolian_FX	Han_Liaoning	Tibetan_Yajiang	Mbuti	-0.001018	-8.29	3198	3240	41147
Mongolian_FX	Han_Liaoning	Tu	Mbuti	-0.001002	-8.256	3194	3235	41191
Mongolian_FX	Han_Liaoning	Han_Shanghai	Mbuti	-0.00129	-8.226	3218	3271	41147
Mongolian_FX	Han_Liaoning	Naxi	Mbuti	-0.001026	-8.21	3208	3250	41191
Mongolian_FX	Han_Liaoning	Qiang_Daofu	Mbuti	-0.001019	-8.188	3204	3246	41147
Mongolian_FX	Han_Liaoning	Bonan	Mbuti	-0.000966	-8.064	3195	3234	41147
Mongolian_FX	Han_Liaoning	Tibetan_Yunnan	Mbuti	-0.001016	-7.314	3201	3243	41147
Mongolian_FX	Han_Liaoning	Tibetan_Shigatse	Mbuti	-0.000918	-7.291	3194	3232	41147
Mongolian_FX	Han_Liaoning	Tibetan_Lhasa	Mbuti	-0.000894	-7.253	3194	3230	41147
Mongolian_FX	Han_Liaoning	Tibetan_Gannan	Mbuti	-0.000912	-7.223	3195	3232	41147
Mongolian_FX	Han_Liaoning	Tibetan_Shannan	Mbuti	-0.000913	-7.218	3196	3233	41147
Mongolian_FX	Han_Liaoning	Tibetan_Chamdo	Mbuti	-0.000842	-7.02	3196	3231	41147
Mongolian_FX	Han_Liaoning	Dongxiang	Mbuti	-0.000831	-6.841	3187	3221	41147
Mongolian_FX	Han_Liaoning	Sherpa	Mbuti	-0.000902	-6.83	3192	3229	41147
Mongolian_FX	Han_Liaoning	Mongola	Mbuti	-0.000848	-6.821	3205	3240	41191
Mongolian_FX	Han_Liaoning	Salar	Mbuti	-0.000802	-6.8	3183	3216	41147
Mongolian_FX	Han_Liaoning	Tibetan_Nagqu	Mbuti	-0.000834	-6.721	3199	3234	41147
Mongolian_FX	Han_Liaoning	Tibetan_Xunhua	Mbuti	-0.000909	-6.58	3198	3236	41147
Mongolian_FX	Han_Liaoning	Tibetan_Gangcha	Mbuti	-0.000717	-5.972	3194	3224	41147
Mongolian_FX	Han_Liaoning	Xibo	Mbuti	-0.000746	-5.898	3210	3241	41191
Mongolian_FX	Han_Liaoning	Hezhen	Mbuti	-0.000477	-3.887	3214	3233	41191
Mongolian_FX	Han_Liaoning	Daur	Mbuti	-0.000467	-3.766	3214	3233	41191
Mongolian_FX	Han_Liaoning	Oroqen	Mbuti	-0.000247	-1.985	3218	3228	41191
Mongolian_FX	Han_Liaoning	Nanai	Mbuti	-3e-05	-0.251	3214	3216	41086
Mongolian_FX	Han_Liaoning	Ulchi	Mbuti	2e-06	0.02	3222	3222	41191
Mongolian_FX	Han_Liaoning	Uyghur	Mbuti	7.2e-05	0.653	3138	3135	41191
Mongolian_FX	Han_Liaoning	Kazakh_China	Mbuti	8e-05	0.705	3174	3171	41147
Mongolian_FX	Han_Liaoning	Buryat	Mbuti	0.000118	1.036	3195	3190	41086
Mongolian_FX	Han_Liaoning	Kyrgyz_China	Mbuti	0.000141	1.275	3161	3155	41147
Mongolian_FX	Han_Liaoning	Evenk_FarEast	Mbuti	0.000171	1.397	3188	3181	41086
Mongolian_FX	Han_Liaoning	Kazakh	Mbuti	0.000183	1.718	3153	3145	41086
Mongolian_FX	Han_Liaoning	Yakut	Mbuti	0.00025	2.1	3206	3196	41191
Mongolian_FX	Han_Liaoning	Uzbek	Mbuti	0.000373	3.569	3115	3099	41191
Mongolian_FX	Han_Liaoning	Even	Mbuti	0.000459	4.011	3176	3157	41191
Mongolian_FX	Han_Liaoning	Evenk_Transbaikal	Mbuti	0.000508	4.075	3210	3189	41086
Mongolian_FX	Han_Liaoning	Tajik	Mbuti	0.000596	5.577	3079	3054	41191
Mongolian_FX	Han_Liaoning	Turkish	Mbuti	0.00073	6.934	3059	3029	41191
Mongolian_FX	Han_Liaoning	Iranian	Mbuti	0.000731	6.941	3046	3016	41191
Mongolian_FX	Han_Liaoning	English	Mbuti	0.000858	7.424	3062	3027	41191
Mongolian_FX	Han_Liaoning	Spanish	Mbuti	0.000841	7.776	3054	3019	41191
Mongolian_FX	Han_Liaoning	Russian	Mbuti	0.000852	7.852	3074	3039	41191
Mongolian_FX	Han_Liaoning	French	Mbuti	0.000858	7.905	3061	3026	41191

## Sheet: C
Supplementary Table 7C: The results of f4-statistics in the form of f4 (Han_Shandong, Han_Liaoning; Modern population, Mbuti) based on HO merged dataset
Pop1 (W)	Pop2 (X)	Pop3 (Y)	Pop4 (Z)	D-stat	Z	BABA	ABBA	SNPs
Han_Shandong	Han_Liaoning	Han_Henan	Mbuti	-0.000214	-1.09	3215	3223	41147
Han_Shandong	Han_Liaoning	Tibetan_Chamdo	Mbuti	-0.000175	-0.97	3196	3203	41147
Han_Shandong	Han_Liaoning	Atayal	Mbuti	-0.000164	-0.799	3196	3203	41147
Han_Shandong	Han_Liaoning	English	Mbuti	-0.000133	-0.752	3020	3025	41147
Han_Shandong	Han_Liaoning	Yakut	Mbuti	-0.000133	-0.749	3177	3183	41147
Han_Shandong	Han_Liaoning	Han_Shanxi	Mbuti	-0.00014	-0.74	3213	3219	41147
Han_Shandong	Han_Liaoning	Xibo	Mbuti	-0.00012	-0.662	3205	3210	41147
Han_Shandong	Han_Liaoning	Tu	Mbuti	-0.000118	-0.66	3195	3199	41147
Han_Shandong	Han_Liaoning	Qiang_Daofu	Mbuti	-0.000116	-0.635	3208	3213	41147
Han_Shandong	Han_Liaoning	She	Mbuti	-0.000114	-0.599	3215	3220	41147
Han_Shandong	Han_Liaoning	Kazakh_China	Mbuti	-9e-05	-0.526	3153	3157	41147
Han_Shandong	Han_Liaoning	Ulchi	Mbuti	-9.4e-05	-0.511	3200	3203	41147
Han_Shandong	Han_Liaoning	Han_Zhejiang	Mbuti	-9.7e-05	-0.504	3216	3220	41147
Han_Shandong	Han_Liaoning	Evenk_Transbaikal	Mbuti	-9e-05	-0.457	3177	3181	41054
Han_Shandong	Han_Liaoning	Kazakh	Mbuti	-7e-05	-0.423	3128	3131	41054
Han_Shandong	Han_Liaoning	Tibetan_Xunhua	Mbuti	-8.5e-05	-0.411	3200	3203	41147
Han_Shandong	Han_Liaoning	Han_Fujian	Mbuti	-7.3e-05	-0.365	3222	3225	41147
Han_Shandong	Han_Liaoning	Tibetan_Yunnan	Mbuti	-7e-05	-0.352	3207	3210	41147
Han_Shandong	Han_Liaoning	Even	Mbuti	-6.1e-05	-0.343	3144	3146	41147
Han_Shandong	Han_Liaoning	Zhuang	Mbuti	-6.1e-05	-0.338	3206	3208	41147
Han_Shandong	Han_Liaoning	Korean	Mbuti	-6.1e-05	-0.32	3213	3216	41147
Han_Shandong	Han_Liaoning	Tibetan_Shigatse	Mbuti	-5.9e-05	-0.32	3197	3199	41147
Han_Shandong	Han_Liaoning	Han	Mbuti	-5.7e-05	-0.319	3212	3214	41147
Han_Shandong	Han_Liaoning	Buryat	Mbuti	-5.2e-05	-0.307	3172	3174	41054
Han_Shandong	Han_Liaoning	CHB.SG	Mbuti	-5.3e-05	-0.302	3223	3225	41147
Han_Shandong	Han_Liaoning	Qiang_Danba	Mbuti	-5.6e-05	-0.302	3212	3214	41147
Han_Shandong	Han_Liaoning	Gelao	Mbuti	-5.6e-05	-0.302	3207	3209	41147
Han_Shandong	Han_Liaoning	Kyrgyz_China	Mbuti	-5e-05	-0.299	3140	3142	41147
Han_Shandong	Han_Liaoning	Mongolian_FX	Mbuti	-5.2e-05	-0.296	3205	3207	41147
Han_Shandong	Han_Liaoning	Bonan	Mbuti	-4.9e-05	-0.273	3199	3201	41147
Han_Shandong	Han_Liaoning	Tibetan_Shannan	Mbuti	-4.9e-05	-0.268	3199	3201	41147
Han_Shandong	Han_Liaoning	Uzbek	Mbuti	-4.2e-05	-0.264	3086	3087	41147
Han_Shandong	Han_Liaoning	Oroqen	Mbuti	-4.7e-05	-0.261	3202	3204	41147
Han_Shandong	Han_Liaoning	Daur	Mbuti	-4.8e-05	-0.26	3203	3205	41147
Han_Shandong	Han_Liaoning	Han_Guangdong	Mbuti	-4.7e-05	-0.251	3214	3216	41147
Han_Shandong	Han_Liaoning	Dongxiang	Mbuti	-3.6e-05	-0.197	3188	3189	41147
Han_Shandong	Han_Liaoning	Yugur	Mbuti	-3e-05	-0.172	3206	3207	41147
Han_Shandong	Han_Liaoning	Dai	Mbuti	-3.1e-05	-0.172	3200	3202	41147
Han_Shandong	Han_Liaoning	Manchu_Liaoning	Mbuti	-2.9e-05	-0.165	3215	3216	41137
Han_Shandong	Han_Liaoning	Yi	Mbuti	-2.7e-05	-0.148	3208	3209	41147
Han_Shandong	Han_Liaoning	Dong_Guizhou	Mbuti	-2.6e-05	-0.139	3215	3216	41147
Han_Shandong	Han_Liaoning	Iranian	Mbuti	-2.2e-05	-0.138	3010	3010	41147
Han_Shandong	Han_Liaoning	Tibetan_Lhasa	Mbuti	-2.2e-05	-0.119	3197	3198	41147
Han_Shandong	Han_Liaoning	Han_Hubei	Mbuti	-2.1e-05	-0.108	3221	3222	41147
Han_Shandong	Han_Liaoning	Miao	Mbuti	-7e-06	-0.035	3214	3215	41147
Han_Shandong	Han_Liaoning	Russian	Mbuti	-5e-06	-0.029	3035	3035	41147
Han_Shandong	Han_Liaoning	Dong_Hunan	Mbuti	-3e-06	-0.018	3215	3215	41147
Han_Shandong	Han_Liaoning	French	Mbuti	-3e-06	-0.018	3022	3022	41147
Han_Shandong	Han_Liaoning	Turkish	Mbuti	-2e-06	-0.009	3023	3023	41147
Han_Shandong	Han_Liaoning	Spanish	Mbuti	-1e-06	-0.009	3015	3015	41147
Han_Shandong	Han_Liaoning	Nanai	Mbuti	7e-06	0.04	3195	3195	41054
Han_Shandong	Han_Liaoning	Tibetan_Yajiang	Mbuti	1.7e-05	0.093	3205	3204	41147
Han_Shandong	Han_Liaoning	Tajik	Mbuti	1.9e-05	0.118	3046	3046	41147
Han_Shandong	Han_Liaoning	Japanese	Mbuti	2.3e-05	0.13	3212	3211	41147
Han_Shandong	Han_Liaoning	Sherpa	Mbuti	2.6e-05	0.131	3196	3195	41147
Han_Shandong	Han_Liaoning	CHS.SG	Mbuti	2.3e-05	0.131	3223	3222	41147
Han_Shandong	Han_Liaoning	Li	Mbuti	2.6e-05	0.132	3213	3212	41147
Han_Shandong	Han_Liaoning	Tibetan_Gangcha	Mbuti	2.4e-05	0.137	3195	3194	41147
Han_Shandong	Han_Liaoning	Han_Jiangsu	Mbuti	2.7e-05	0.143	3219	3218	41147
Han_Shandong	Han_Liaoning	Tibetan_Gannan	Mbuti	2.9e-05	0.152	3199	3198	41147
Han_Shandong	Han_Liaoning	Maonan	Mbuti	3.9e-05	0.206	3212	3210	41147
Han_Shandong	Han_Liaoning	China_Lahu	Mbuti	3.9e-05	0.207	3198	3197	41147
Han_Shandong	Han_Liaoning	Evenk_FarEast	Mbuti	3.9e-05	0.214	3167	3165	41054
Han_Shandong	Han_Liaoning	Han_Sichuan	Mbuti	4.2e-05	0.226	3213	3211	41147
Han_Shandong	Han_Liaoning	Tibetan_Xinlong	Mbuti	4.8e-05	0.261	3213	3211	41147
Han_Shandong	Han_Liaoning	Han_Chongqing	Mbuti	5.9e-05	0.288	3219	3216	41147
Han_Shandong	Han_Liaoning	Mulam	Mbuti	5.4e-05	0.302	3210	3208	41147
Han_Shandong	Han_Liaoning	Salar	Mbuti	7.7e-05	0.43	3186	3183	41147
Han_Shandong	Han_Liaoning	Tibetan_Nagqu	Mbuti	8e-05	0.431	3204	3200	41147
Han_Shandong	Han_Liaoning	Hezhen	Mbuti	9.4e-05	0.497	3207	3203	41147
Han_Shandong	Han_Liaoning	Mongola	Mbuti	0.000102	0.53	3206	3202	41147
Han_Shandong	Han_Liaoning	Naxi	Mbuti	0.000118	0.63	3214	3209	41147
Han_Shandong	Han_Liaoning	Ami	Mbuti	0.00013	0.66	3211	3206	41147
Han_Shandong	Han_Liaoning	Uyghur	Mbuti	0.000118	0.713	3119	3114	41147
Han_Shandong	Han_Liaoning	Han_Shanghai	Mbuti	0.000185	0.829	3236	3228	41147

## Sheet: D
Supplementary Table 7D: The results of f4-statistics in the form of f4 (Han_Henan, Han_Liaoning; Modern population, Mbuti) based on HO merged dataset
Pop1 (W)	Pop2 (X)	Pop3 (Y)	Pop4 (Z)	D-stat	Z	BABA	ABBA	SNPs
Han_Henan	Han_Liaoning	She	Mbuti	0.000132	0.513	3213	3208	41147
Han_Henan	Han_Liaoning	Han_Shandong	Mbuti	0.000149	0.588	3215	3208	41147
Han_Henan	Han_Liaoning	Tu	Mbuti	0.000181	0.743	3194	3187	41147
Han_Henan	Han_Liaoning	Han_Guangdong	Mbuti	0.000219	0.837	3213	3204	41147
Han_Henan	Han_Liaoning	Han_Fujian	Mbuti	0.000257	0.958	3223	3212	41147
Han_Henan	Han_Liaoning	Han_Zhejiang	Mbuti	0.000283	1.048	3216	3205	41147
Han_Henan	Han_Liaoning	Li	Mbuti	0.000299	1.05	3212	3200	41147
Han_Henan	Han_Liaoning	Maonan	Mbuti	0.000263	1.051	3210	3199	41147
Han_Henan	Han_Liaoning	China_Lahu	Mbuti	0.000315	1.208	3198	3185	41147
Han_Henan	Han_Liaoning	Mulam	Mbuti	0.000303	1.242	3209	3196	41147
Han_Henan	Han_Liaoning	Han_Shanxi	Mbuti	0.000315	1.245	3217	3204	41147
Han_Henan	Han_Liaoning	Dong_Hunan	Mbuti	0.000329	1.272	3215	3201	41147
Han_Henan	Han_Liaoning	Daur	Mbuti	0.000324	1.273	3205	3191	41147
Han_Henan	Han_Liaoning	Zhuang	Mbuti	0.000317	1.275	3207	3194	41147
Han_Henan	Han_Liaoning	Tibetan_Yunnan	Mbuti	0.000364	1.291	3209	3194	41147
Han_Henan	Han_Liaoning	Tibetan_Xinlong	Mbuti	0.000339	1.354	3213	3199	41147
Han_Henan	Han_Liaoning	Miao	Mbuti	0.000353	1.357	3216	3201	41147
Han_Henan	Han_Liaoning	Korean	Mbuti	0.000357	1.372	3216	3202	41147
Han_Henan	Han_Liaoning	Manchu_Liaoning	Mbuti	0.000332	1.375	3216	3203	41137
Han_Henan	Han_Liaoning	Tibetan_Yajiang	Mbuti	0.000358	1.386	3206	3191	41147
Han_Henan	Han_Liaoning	Hezhen	Mbuti	0.000365	1.415	3206	3191	41147
Han_Henan	Han_Liaoning	Sherpa	Mbuti	0.000387	1.443	3198	3182	41147
Han_Henan	Han_Liaoning	Gelao	Mbuti	0.000365	1.455	3211	3196	41147
Han_Henan	Han_Liaoning	CHB.SG	Mbuti	0.000355	1.459	3225	3210	41147
Han_Henan	Han_Liaoning	Salar	Mbuti	0.000388	1.525	3186	3170	41147
Han_Henan	Han_Liaoning	Han_Jiangsu	Mbuti	0.000401	1.55	3220	3203	41147
Han_Henan	Han_Liaoning	Yakut	Mbuti	0.00039	1.573	3182	3166	41147
Han_Henan	Han_Liaoning	Nanai	Mbuti	0.000419	1.593	3198	3181	41054
Han_Henan	Han_Liaoning	Ami	Mbuti	0.000427	1.601	3210	3193	41147
Han_Henan	Han_Liaoning	Oroqen	Mbuti	0.000408	1.61	3205	3189	41147
Han_Henan	Han_Liaoning	Dong_Guizhou	Mbuti	0.000408	1.621	3217	3201	41147
Han_Henan	Han_Liaoning	Tibetan_Xunhua	Mbuti	0.000456	1.623	3206	3187	41147
Han_Henan	Han_Liaoning	CHS.SG	Mbuti	0.000396	1.632	3225	3208	41147
Han_Henan	Han_Liaoning	Atayal	Mbuti	0.000466	1.645	3203	3184	41147
Han_Henan	Han_Liaoning	Xibo	Mbuti	0.000445	1.72	3210	3191	41147
Han_Henan	Han_Liaoning	Yi	Mbuti	0.000442	1.731	3212	3194	41147
Han_Henan	Han_Liaoning	Evenk_Transbaikal	Mbuti	0.000467	1.754	3183	3163	41054
Han_Henan	Han_Liaoning	Han	Mbuti	0.000425	1.766	3216	3198	41147
Han_Henan	Han_Liaoning	Ulchi	Mbuti	0.000471	1.825	3206	3186	41147
Han_Henan	Han_Liaoning	Buryat	Mbuti	0.000435	1.829	3176	3159	41054
Han_Henan	Han_Liaoning	Bonan	Mbuti	0.000468	1.88	3204	3185	41147
Han_Henan	Han_Liaoning	Mongola	Mbuti	0.000487	1.893	3209	3189	41147
Han_Henan	Han_Liaoning	Han_Chongqing	Mbuti	0.000529	1.911	3223	3201	41147
Han_Henan	Han_Liaoning	Dongxiang	Mbuti	0.000477	1.911	3192	3173	41147
Han_Henan	Han_Liaoning	Han_Shanghai	Mbuti	0.000602	1.943	3237	3212	41147
Han_Henan	Han_Liaoning	Mongolian_FX	Mbuti	0.000475	1.986	3210	3190	41147
Han_Henan	Han_Liaoning	Han_Hubei	Mbuti	0.000533	1.988	3226	3204	41147
Han_Henan	Han_Liaoning	Tibetan_Shannan	Mbuti	0.000517	2.033	3205	3184	41147
Han_Henan	Han_Liaoning	Evenk_FarEast	Mbuti	0.000535	2.055	3171	3149	41054
Han_Henan	Han_Liaoning	Even	Mbuti	0.000514	2.056	3151	3130	41147
Han_Henan	Han_Liaoning	Tibetan_Lhasa	Mbuti	0.000528	2.071	3203	3181	41147
Han_Henan	Han_Liaoning	Japanese	Mbuti	0.000516	2.08	3216	3195	41147
Han_Henan	Han_Liaoning	Uzbek	Mbuti	0.000468	2.088	3091	3072	41147
Han_Henan	Han_Liaoning	Qiang_Danba	Mbuti	0.000544	2.117	3218	3196	41147
Han_Henan	Han_Liaoning	Tibetan_Gannan	Mbuti	0.00053	2.152	3203	3182	41147
Han_Henan	Han_Liaoning	Yugur	Mbuti	0.000551	2.198	3212	3189	41147
Han_Henan	Han_Liaoning	Dai	Mbuti	0.000556	2.205	3207	3184	41147
Han_Henan	Han_Liaoning	Kazakh	Mbuti	0.000525	2.234	3135	3113	41054
Han_Henan	Han_Liaoning	Kyrgyz_China	Mbuti	0.000528	2.25	3146	3124	41147
Han_Henan	Han_Liaoning	Kazakh_China	Mbuti	0.000565	2.273	3162	3138	41147
Han_Henan	Han_Liaoning	Uyghur	Mbuti	0.000533	2.286	3122	3100	41147
Han_Henan	Han_Liaoning	Tibetan_Gangcha	Mbuti	0.000555	2.295	3199	3176	41147
Han_Henan	Han_Liaoning	Tibetan_Shigatse	Mbuti	0.000598	2.363	3205	3180	41147
Han_Henan	Han_Liaoning	Tibetan_Nagqu	Mbuti	0.000611	2.367	3209	3184	41147
Han_Henan	Han_Liaoning	English	Mbuti	0.000578	2.383	3030	3007	41147
Han_Henan	Han_Liaoning	Tibetan_Chamdo	Mbuti	0.000623	2.448	3207	3181	41147
Han_Henan	Han_Liaoning	Naxi	Mbuti	0.000618	2.463	3218	3192	41147
Han_Henan	Han_Liaoning	Han_Sichuan	Mbuti	0.000627	2.465	3219	3193	41147
Han_Henan	Han_Liaoning	Qiang_Daofu	Mbuti	0.000643	2.538	3218	3191	41147
Han_Henan	Han_Liaoning	Spanish	Mbuti	0.000616	2.646	3024	2998	41147
Han_Henan	Han_Liaoning	Iranian	Mbuti	0.000612	2.674	3019	2993	41147
Han_Henan	Han_Liaoning	Turkish	Mbuti	0.00064	2.788	3032	3006	41147
Han_Henan	Han_Liaoning	Tajik	Mbuti	0.000644	2.84	3055	3028	41147
Han_Henan	Han_Liaoning	French	Mbuti	0.000703	2.989	3032	3003	41147
Han_Henan	Han_Liaoning	Russian	Mbuti	0.000709	3.03	3046	3017	41147

## Sheet: E
Supplementary Table 7E: The results of f4-statistics in the form of f4 (Han_Shanxi, Han_Liaoning; Modern population, Mbuti) based on HO merged dataset
Pop1 (W)	Pop2 (X)	Pop3 (Y)	Pop4 (Z)	D-stat	Z	BABA	ABBA	SNPs
Han_Shanxi	Han_Liaoning	Gelao	Mbuti	-0.000424	-1.945	3201	3218	41147
Han_Shanxi	Han_Liaoning	Li	Mbuti	-0.000408	-1.744	3205	3222	41147
Han_Shanxi	Han_Liaoning	Han_Shandong	Mbuti	-0.000314	-1.496	3213	3226	41147
Han_Shanxi	Han_Liaoning	Japanese	Mbuti	-0.000291	-1.455	3207	3219	41147
Han_Shanxi	Han_Liaoning	Maonan	Mbuti	-0.000295	-1.416	3206	3218	41147
Han_Shanxi	Han_Liaoning	Mulam	Mbuti	-0.00029	-1.37	3204	3216	41147
Han_Shanxi	Han_Liaoning	CHS.SG	Mbuti	-0.000251	-1.247	3219	3229	41147
Han_Shanxi	Han_Liaoning	Dong_Guizhou	Mbuti	-0.000246	-1.191	3211	3221	41147
Han_Shanxi	Han_Liaoning	Han_Fujian	Mbuti	-0.000265	-1.176	3219	3230	41147
Han_Shanxi	Han_Liaoning	Atayal	Mbuti	-0.00025	-1.092	3197	3207	41147
Han_Shanxi	Han_Liaoning	CHB.SG	Mbuti	-0.000216	-1.073	3221	3230	41147
Han_Shanxi	Han_Liaoning	Tibetan_Xinlong	Mbuti	-0.000216	-1.059	3209	3218	41147
Han_Shanxi	Han_Liaoning	Zhuang	Mbuti	-0.000219	-1.052	3204	3213	41147
Han_Shanxi	Han_Liaoning	Ami	Mbuti	-0.000242	-1.048	3205	3215	41147
Han_Shanxi	Han_Liaoning	Han_Zhejiang	Mbuti	-0.000223	-1.033	3215	3224	41147
Han_Shanxi	Han_Liaoning	Manchu_Liaoning	Mbuti	-0.000201	-1.019	3213	3222	41137
Han_Shanxi	Han_Liaoning	Han_Henan	Mbuti	-0.000222	-1.009	3217	3226	41147
Han_Shanxi	Han_Liaoning	Han	Mbuti	-0.000201	-1.007	3211	3219	41147
Han_Shanxi	Han_Liaoning	Dai	Mbuti	-0.000193	-0.936	3199	3207	41147
Han_Shanxi	Han_Liaoning	Han_Jiangsu	Mbuti	-0.000192	-0.912	3216	3224	41147
Han_Shanxi	Han_Liaoning	Tibetan_Gannan	Mbuti	-0.000191	-0.883	3197	3204	41147
Han_Shanxi	Han_Liaoning	China_Lahu	Mbuti	-0.00019	-0.867	3196	3204	41147
Han_Shanxi	Han_Liaoning	She	Mbuti	-0.00017	-0.791	3216	3223	41147
Han_Shanxi	Han_Liaoning	Nanai	Mbuti	-0.000163	-0.777	3195	3201	41054
Han_Shanxi	Han_Liaoning	Qiang_Danba	Mbuti	-0.000164	-0.771	3211	3218	41147
Han_Shanxi	Han_Liaoning	Ulchi	Mbuti	-0.000156	-0.756	3201	3207	41147
Han_Shanxi	Han_Liaoning	Korean	Mbuti	-0.000158	-0.733	3213	3220	41147
Han_Shanxi	Han_Liaoning	Han_Shanghai	Mbuti	-0.000175	-0.692	3229	3236	41147
Han_Shanxi	Han_Liaoning	Oroqen	Mbuti	-0.000141	-0.669	3203	3208	41147
Han_Shanxi	Han_Liaoning	Evenk_Transbaikal	Mbuti	-0.000147	-0.666	3178	3184	41054
Han_Shanxi	Han_Liaoning	Han_Guangdong	Mbuti	-0.000141	-0.665	3214	3220	41147
Han_Shanxi	Han_Liaoning	Sherpa	Mbuti	-0.000142	-0.641	3195	3200	41147
Han_Shanxi	Han_Liaoning	Hezhen	Mbuti	-0.000135	-0.633	3203	3208	41147
Han_Shanxi	Han_Liaoning	Dong_Hunan	Mbuti	-0.000132	-0.611	3214	3220	41147
Han_Shanxi	Han_Liaoning	Tibetan_Xunhua	Mbuti	-0.000133	-0.58	3201	3207	41147
Han_Shanxi	Han_Liaoning	Miao	Mbuti	-0.000117	-0.561	3214	3219	41147
Han_Shanxi	Han_Liaoning	Han_Sichuan	Mbuti	-0.000109	-0.54	3211	3215	41147
Han_Shanxi	Han_Liaoning	Han_Hubei	Mbuti	-0.000118	-0.531	3221	3226	41147
Han_Shanxi	Han_Liaoning	Bonan	Mbuti	-0.000103	-0.515	3200	3204	41147
Han_Shanxi	Han_Liaoning	Mongolian_FX	Mbuti	-9.5e-05	-0.486	3206	3210	41147
Han_Shanxi	Han_Liaoning	Xibo	Mbuti	-9.8e-05	-0.472	3207	3211	41147
Han_Shanxi	Han_Liaoning	Salar	Mbuti	-9.8e-05	-0.466	3184	3188	41147
Han_Shanxi	Han_Liaoning	Yi	Mbuti	-9e-05	-0.429	3209	3213	41147
Han_Shanxi	Han_Liaoning	Daur	Mbuti	-8e-05	-0.39	3204	3207	41147
Han_Shanxi	Han_Liaoning	Tibetan_Yunnan	Mbuti	-8.5e-05	-0.368	3208	3212	41147
Han_Shanxi	Han_Liaoning	Tibetan_Yajiang	Mbuti	-7.5e-05	-0.357	3205	3208	41147
Han_Shanxi	Han_Liaoning	Tu	Mbuti	-5.8e-05	-0.288	3198	3200	41147
Han_Shanxi	Han_Liaoning	Buryat	Mbuti	-4.8e-05	-0.246	3175	3177	41054
Han_Shanxi	Han_Liaoning	Evenk_FarEast	Mbuti	-4.7e-05	-0.218	3167	3169	41054
Han_Shanxi	Han_Liaoning	Tibetan_Lhasa	Mbuti	-2.1e-05	-0.101	3200	3201	41147
Han_Shanxi	Han_Liaoning	Tibetan_Shigatse	Mbuti	-1.6e-05	-0.076	3200	3201	41147
Han_Shanxi	Han_Liaoning	Yugur	Mbuti	-1.5e-05	-0.074	3208	3209	41147
Han_Shanxi	Han_Liaoning	Dongxiang	Mbuti	-8e-06	-0.038	3191	3191	41147
Han_Shanxi	Han_Liaoning	Tibetan_Shannan	Mbuti	2e-06	0.01	3201	3201	41147
Han_Shanxi	Han_Liaoning	Tibetan_Chamdo	Mbuti	8e-06	0.041	3202	3201	41147
Han_Shanxi	Han_Liaoning	Yakut	Mbuti	3.1e-05	0.155	3184	3183	41147
Han_Shanxi	Han_Liaoning	Kyrgyz_China	Mbuti	3.5e-05	0.187	3144	3142	41147
Han_Shanxi	Han_Liaoning	Mongola	Mbuti	3.9e-05	0.189	3207	3205	41147
Han_Shanxi	Han_Liaoning	Qiang_Daofu	Mbuti	4e-05	0.193	3213	3212	41147
Han_Shanxi	Han_Liaoning	Even	Mbuti	5e-05	0.249	3149	3147	41147
Han_Shanxi	Han_Liaoning	Naxi	Mbuti	5.6e-05	0.269	3214	3212	41147
Han_Shanxi	Han_Liaoning	Kazakh	Mbuti	7.9e-05	0.418	3134	3130	41054
Han_Shanxi	Han_Liaoning	Han_Chongqing	Mbuti	0.000108	0.472	3221	3216	41147
Han_Shanxi	Han_Liaoning	Kazakh_China	Mbuti	0.000108	0.541	3160	3155	41147
Han_Shanxi	Han_Liaoning	Tibetan_Nagqu	Mbuti	0.000122	0.594	3207	3202	41147
Han_Shanxi	Han_Liaoning	Tibetan_Gangcha	Mbuti	0.000118	0.602	3199	3194	41147
Han_Shanxi	Han_Liaoning	Tajik	Mbuti	0.000133	0.715	3051	3045	41147
Han_Shanxi	Han_Liaoning	Uyghur	Mbuti	0.000166	0.874	3122	3116	41147
Han_Shanxi	Han_Liaoning	Uzbek	Mbuti	0.000188	1.037	3093	3085	41147
Han_Shanxi	Han_Liaoning	Turkish	Mbuti	0.000278	1.512	3031	3020	41147
Han_Shanxi	Han_Liaoning	Iranian	Mbuti	0.00028	1.53	3018	3007	41147
Han_Shanxi	Han_Liaoning	Spanish	Mbuti	0.000301	1.591	3024	3012	41147
Han_Shanxi	Han_Liaoning	Russian	Mbuti	0.000309	1.636	3044	3032	41147
Han_Shanxi	Han_Liaoning	English	Mbuti	0.000365	1.82	3033	3018	41147
Han_Shanxi	Han_Liaoning	French	Mbuti	0.000348	1.828	3032	3018	41147

## Sheet: F
Supplementary Table 7F: The results of f4-statistics in the form of f4 (Han_HGDP, Han_Liaoning; Modern population, Mbuti) based on HO merged dataset
Pop1 (W)	Pop2 (X)	Pop3 (Y)	Pop4 (Z)	D-stat	Z	BABA	ABBA	SNPs
Han_HGDP	Han_Liaoning	Evenk_Transbaikal	Mbuti	-0.000798	-6.621	3164	3197	41086
Han_HGDP	Han_Liaoning	Yakut	Mbuti	-0.000642	-5.79	3170	3197	41191
Han_HGDP	Han_Liaoning	Buryat	Mbuti	-0.000609	-5.686	3163	3188	41086
Han_HGDP	Han_Liaoning	Ulchi	Mbuti	-0.000635	-5.48	3192	3218	41191
Han_HGDP	Han_Liaoning	Nanai	Mbuti	-0.000634	-5.353	3185	3211	41086
Han_HGDP	Han_Liaoning	Tibetan_Shannan	Mbuti	-0.000619	-5.348	3187	3213	41147
Han_HGDP	Han_Liaoning	Tibetan_Lhasa	Mbuti	-0.000593	-5.212	3186	3210	41147
Han_HGDP	Han_Liaoning	Oroqen	Mbuti	-0.00057	-4.99	3195	3218	41191
Han_HGDP	Han_Liaoning	Tibetan_Chamdo	Mbuti	-0.000553	-4.984	3188	3210	41147
Han_HGDP	Han_Liaoning	Kyrgyz_China	Mbuti	-0.000516	-4.928	3131	3152	41147
Han_HGDP	Han_Liaoning	Evenk_FarEast	Mbuti	-0.000573	-4.906	3156	3180	41086
Han_HGDP	Han_Liaoning	Tibetan_Nagqu	Mbuti	-0.000576	-4.891	3190	3214	41147
Han_HGDP	Han_Liaoning	Even	Mbuti	-0.000541	-4.79	3138	3160	41191
Han_HGDP	Han_Liaoning	Tibetan_Gangcha	Mbuti	-0.000519	-4.712	3183	3205	41147
Han_HGDP	Han_Liaoning	Hezhen	Mbuti	-0.000539	-4.687	3197	3219	41191
Han_HGDP	Han_Liaoning	Daur	Mbuti	-0.000526	-4.584	3197	3219	41191
Han_HGDP	Han_Liaoning	Kazakh	Mbuti	-0.000466	-4.575	3122	3142	41086
Han_HGDP	Han_Liaoning	Tibetan_Shigatse	Mbuti	-0.000513	-4.431	3188	3209	41147
Han_HGDP	Han_Liaoning	Xibo	Mbuti	-0.000519	-4.423	3200	3221	41191
Han_HGDP	Han_Liaoning	Tibetan_Xunhua	Mbuti	-0.000503	-4.087	3192	3213	41147
Han_HGDP	Han_Liaoning	Kazakh_China	Mbuti	-0.000442	-4.077	3146	3164	41147
Han_HGDP	Han_Liaoning	Sherpa	Mbuti	-0.000496	-4.038	3186	3206	41147
Han_HGDP	Han_Liaoning	Tibetan_Yajiang	Mbuti	-0.0004	-3.506	3197	3213	41147
Han_HGDP	Han_Liaoning	Qiang_Daofu	Mbuti	-0.000392	-3.384	3203	3219	41147
Han_HGDP	Han_Liaoning	Uzbek	Mbuti	-0.000315	-3.2	3084	3097	41191
Han_HGDP	Han_Liaoning	Mongola	Mbuti	-0.00038	-3.189	3201	3216	41191
Han_HGDP	Han_Liaoning	Uyghur	Mbuti	-0.000335	-3.183	3113	3127	41191
Han_HGDP	Han_Liaoning	Tibetan_Yunnan	Mbuti	-0.000396	-3.082	3201	3217	41147
Han_HGDP	Han_Liaoning	Tu	Mbuti	-0.000337	-3.047	3194	3208	41191
Han_HGDP	Han_Liaoning	Mongolian_FX	Mbuti	-0.00033	-2.997	3203	3217	41191
Han_HGDP	Han_Liaoning	Han_Shandong	Mbuti	-0.000348	-2.996	3212	3226	41147
Han_HGDP	Han_Liaoning	Bonan	Mbuti	-0.00034	-2.983	3193	3207	41147
Han_HGDP	Han_Liaoning	Qiang_Danba	Mbuti	-0.00032	-2.795	3207	3220	41147
Han_HGDP	Han_Liaoning	Han_Shanxi	Mbuti	-0.000318	-2.716	3211	3224	41147
Han_HGDP	Han_Liaoning	Salar	Mbuti	-0.00027	-2.438	3180	3191	41147
Han_HGDP	Han_Liaoning	Manchu_Liaoning	Mbuti	-0.000268	-2.43	3214	3225	41181
Han_HGDP	Han_Liaoning	Tibetan_Xinlong	Mbuti	-0.000279	-2.427	3207	3218	41147
Han_HGDP	Han_Liaoning	Korean	Mbuti	-0.000271	-2.272	3214	3225	41191
Han_HGDP	Han_Liaoning	Yugur	Mbuti	-0.00025	-2.253	3202	3212	41147
Han_HGDP	Han_Liaoning	Dongxiang	Mbuti	-0.00024	-2.099	3185	3195	41147
Han_HGDP	Han_Liaoning	Japanese	Mbuti	-0.000232	-2.043	3211	3220	41191
Han_HGDP	Han_Liaoning	Tibetan_Gannan	Mbuti	-0.000227	-1.988	3195	3204	41147
Han_HGDP	Han_Liaoning	Russian	Mbuti	-0.00019	-1.846	3036	3043	41191
Han_HGDP	Han_Liaoning	Han_Henan	Mbuti	-0.000228	-1.824	3216	3225	41147
Han_HGDP	Han_Liaoning	English	Mbuti	-0.000194	-1.81	3023	3031	41191
Han_HGDP	Han_Liaoning	Tajik	Mbuti	-0.000179	-1.792	3046	3054	41191
Han_HGDP	Han_Liaoning	Turkish	Mbuti	-0.00017	-1.703	3024	3031	41191
Han_HGDP	Han_Liaoning	French	Mbuti	-0.000168	-1.64	3023	3030	41191
Han_HGDP	Han_Liaoning	Yi	Mbuti	-0.000167	-1.453	3209	3216	41191
Han_HGDP	Han_Liaoning	Spanish	Mbuti	-0.000146	-1.431	3017	3023	41191
Han_HGDP	Han_Liaoning	Iranian	Mbuti	-0.000131	-1.328	3012	3017	41191
Han_HGDP	Han_Liaoning	Naxi	Mbuti	-0.000138	-1.192	3213	3219	41191
Han_HGDP	Han_Liaoning	CHB.SG	Mbuti	-0.000101	-0.896	3227	3231	41191
Han_HGDP	Han_Liaoning	Han_Jiangsu	Mbuti	-9.7e-05	-0.819	3218	3222	41147
Han_HGDP	Han_Liaoning	Han_Shanghai	Mbuti	-6.8e-05	-0.476	3231	3233	41147
Han_HGDP	Han_Liaoning	Han_Zhejiang	Mbuti	-3e-06	-0.02	3219	3219	41147
Han_HGDP	Han_Liaoning	Han_Hubei	Mbuti	7e-05	0.568	3225	3222	41147
Han_HGDP	Han_Liaoning	Han_Chongqing	Mbuti	0.000119	0.876	3222	3217	41147
Han_HGDP	Han_Liaoning	Han_Sichuan	Mbuti	0.000191	1.58	3217	3210	41147
Han_HGDP	Han_Liaoning	Han_Fujian	Mbuti	0.000244	1.959	3230	3220	41147
Han_HGDP	Han_Liaoning	Miao	Mbuti	0.000308	2.606	3227	3214	41191
Han_HGDP	Han_Liaoning	CHS.SG	Mbuti	0.00033	2.916	3235	3222	41191
Han_HGDP	Han_Liaoning	She	Mbuti	0.000375	3.177	3231	3216	41191
Han_HGDP	Han_Liaoning	China_Lahu	Mbuti	0.000562	4.676	3216	3193	41191
Han_HGDP	Han_Liaoning	Han_Guangdong	Mbuti	0.000599	5.072	3231	3206	41147
Han_HGDP	Han_Liaoning	Dong_Hunan	Mbuti	0.000681	5.705	3232	3204	41147
Han_HGDP	Han_Liaoning	Gelao	Mbuti	0.000678	5.762	3226	3198	41147
Han_HGDP	Han_Liaoning	Dong_Guizhou	Mbuti	0.000738	6.267	3234	3203	41147
Han_HGDP	Han_Liaoning	Atayal	Mbuti	0.000904	6.973	3225	3188	41191
Han_HGDP	Han_Liaoning	Zhuang	Mbuti	0.000824	7.066	3228	3194	41147
Han_HGDP	Han_Liaoning	Mulam	Mbuti	0.000854	7.309	3230	3195	41147
Han_HGDP	Han_Liaoning	Maonan	Mbuti	0.000892	7.397	3233	3196	41147
Han_HGDP	Han_Liaoning	Ami	Mbuti	0.000979	7.923	3236	3195	41191
Han_HGDP	Han_Liaoning	Li	Mbuti	0.001085	8.347	3239	3194	41147
Han_HGDP	Han_Liaoning	Dai	Mbuti	0.001033	8.515	3230	3187	41191

## Sheet: G
Supplementary Table 7G: The results of f4-statistics in the form of f4 (Han_Zhejiang, Han_Liaoning; Modern population, Mbuti) based on HO merged dataset
Pop1 (W)	Pop2 (X)	Pop3 (Y)	Pop4 (Z)	D-stat	Z	BABA	ABBA	SNPs
Han_Zhejiang	Han_Liaoning	Evenk_Transbaikal	Mbuti	-0.00043	-1.636	3164	3182	41054
Han_Zhejiang	Han_Liaoning	Buryat	Mbuti	-0.000334	-1.439	3161	3175	41054
Han_Zhejiang	Han_Liaoning	Kyrgyz_China	Mbuti	-0.000306	-1.316	3129	3141	41147
Han_Zhejiang	Han_Liaoning	Russian	Mbuti	-0.000289	-1.239	3024	3036	41147
Han_Zhejiang	Han_Liaoning	Kazakh_China	Mbuti	-0.000275	-1.126	3144	3155	41147
Han_Zhejiang	Han_Liaoning	Evenk_FarEast	Mbuti	-0.000277	-1.109	3154	3165	41054
Han_Zhejiang	Han_Liaoning	Tibetan_Lhasa	Mbuti	-0.00027	-1.087	3187	3198	41147
Han_Zhejiang	Han_Liaoning	English	Mbuti	-0.000262	-1.063	3012	3023	41147
Han_Zhejiang	Han_Liaoning	French	Mbuti	-0.000234	-1.013	3012	3021	41147
Han_Zhejiang	Han_Liaoning	Kazakh	Mbuti	-0.000199	-0.871	3120	3128	41054
Han_Zhejiang	Han_Liaoning	Spanish	Mbuti	-0.0002	-0.862	3006	3014	41147
Han_Zhejiang	Han_Liaoning	Ulchi	Mbuti	-0.000208	-0.851	3192	3201	41147
Han_Zhejiang	Han_Liaoning	Hezhen	Mbuti	-0.000211	-0.843	3195	3203	41147
Han_Zhejiang	Han_Liaoning	Oroqen	Mbuti	-0.000206	-0.801	3193	3202	41147
Han_Zhejiang	Han_Liaoning	Turkish	Mbuti	-0.000176	-0.771	3015	3022	41147
Han_Zhejiang	Han_Liaoning	Uyghur	Mbuti	-0.000173	-0.759	3108	3115	41147
Han_Zhejiang	Han_Liaoning	Yakut	Mbuti	-0.000186	-0.739	3172	3179	41147
Han_Zhejiang	Han_Liaoning	Uzbek	Mbuti	-0.000163	-0.729	3078	3085	41147
Han_Zhejiang	Han_Liaoning	Tajik	Mbuti	-0.000163	-0.714	3037	3044	41147
Han_Zhejiang	Han_Liaoning	Daur	Mbuti	-0.000173	-0.689	3195	3202	41147
Han_Zhejiang	Han_Liaoning	Even	Mbuti	-0.00017	-0.679	3137	3144	41147
Han_Zhejiang	Han_Liaoning	Iranian	Mbuti	-0.000153	-0.667	3002	3008	41147
Han_Zhejiang	Han_Liaoning	Tibetan_Nagqu	Mbuti	-0.000162	-0.646	3193	3200	41147
Han_Zhejiang	Han_Liaoning	Nanai	Mbuti	-0.000158	-0.633	3188	3194	41054
Han_Zhejiang	Han_Liaoning	Tibetan_Gangcha	Mbuti	-0.000133	-0.556	3186	3192	41147
Han_Zhejiang	Han_Liaoning	Tibetan_Chamdo	Mbuti	-0.000134	-0.543	3191	3196	41147
Han_Zhejiang	Han_Liaoning	Bonan	Mbuti	-0.000125	-0.512	3192	3197	41147
Han_Zhejiang	Han_Liaoning	Sherpa	Mbuti	-0.000137	-0.507	3187	3193	41147
Han_Zhejiang	Han_Liaoning	Qiang_Daofu	Mbuti	-0.00012	-0.483	3203	3208	41147
Han_Zhejiang	Han_Liaoning	Tibetan_Shannan	Mbuti	-8.8e-05	-0.35	3194	3197	41147
Han_Zhejiang	Han_Liaoning	Xibo	Mbuti	-6.6e-05	-0.264	3201	3203	41147
Han_Zhejiang	Han_Liaoning	Tu	Mbuti	-6.3e-05	-0.262	3191	3194	41147
Han_Zhejiang	Han_Liaoning	Tibetan_Yunnan	Mbuti	-6.7e-05	-0.245	3201	3204	41147
Han_Zhejiang	Han_Liaoning	Tibetan_Shigatse	Mbuti	-3.9e-05	-0.156	3193	3194	41147
Han_Zhejiang	Han_Liaoning	Qiang_Danba	Mbuti	-2.2e-05	-0.087	3207	3208	41147
Han_Zhejiang	Han_Liaoning	Japanese	Mbuti	8e-06	0.033	3206	3206	41147
Han_Zhejiang	Han_Liaoning	Tibetan_Yajiang	Mbuti	1e-05	0.042	3200	3199	41147
Han_Zhejiang	Han_Liaoning	Salar	Mbuti	3.2e-05	0.133	3181	3180	41147
Han_Zhejiang	Han_Liaoning	Mongolian_FX	Mbuti	6.6e-05	0.285	3203	3200	41147
Han_Zhejiang	Han_Liaoning	Naxi	Mbuti	8.7e-05	0.349	3208	3204	41147
Han_Zhejiang	Han_Liaoning	Han_Shandong	Mbuti	9e-05	0.369	3216	3212	41147
Han_Zhejiang	Han_Liaoning	Han_Henan	Mbuti	0.000107	0.407	3216	3212	41147
Han_Zhejiang	Han_Liaoning	Korean	Mbuti	0.000108	0.421	3213	3208	41147
Han_Zhejiang	Han_Liaoning	Yugur	Mbuti	0.000102	0.422	3204	3199	41147
Han_Zhejiang	Han_Liaoning	Han_Shanxi	Mbuti	0.000137	0.545	3215	3209	41147
Han_Zhejiang	Han_Liaoning	Mongola	Mbuti	0.000168	0.649	3203	3196	41147
Han_Zhejiang	Han_Liaoning	Tibetan_Xinlong	Mbuti	0.000161	0.658	3210	3203	41147
Han_Zhejiang	Han_Liaoning	Manchu_Liaoning	Mbuti	0.000188	0.795	3215	3207	41137
Han_Zhejiang	Han_Liaoning	Tibetan_Xunhua	Mbuti	0.000231	0.812	3203	3194	41147
Han_Zhejiang	Han_Liaoning	Tibetan_Gannan	Mbuti	0.000243	0.933	3199	3189	41147
Han_Zhejiang	Han_Liaoning	Yi	Mbuti	0.000232	0.95	3209	3199	41147
Han_Zhejiang	Han_Liaoning	Dongxiang	Mbuti	0.000248	0.981	3190	3180	41147
Han_Zhejiang	Han_Liaoning	CHB.SG	Mbuti	0.000291	1.204	3226	3215	41147
Han_Zhejiang	Han_Liaoning	Han_Sichuan	Mbuti	0.000312	1.237	3213	3201	41147
Han_Zhejiang	Han_Liaoning	Han_Shanghai	Mbuti	0.000396	1.259	3234	3218	41147
Han_Zhejiang	Han_Liaoning	Han_Jiangsu	Mbuti	0.000368	1.472	3222	3207	41147
Han_Zhejiang	Han_Liaoning	She	Mbuti	0.000425	1.645	3223	3205	41147
Han_Zhejiang	Han_Liaoning	Han_Chongqing	Mbuti	0.000546	1.96	3225	3203	41147
Han_Zhejiang	Han_Liaoning	Han	Mbuti	0.000475	1.975	3219	3200	41147
Han_Zhejiang	Han_Liaoning	Han_Fujian	Mbuti	0.000551	2.077	3231	3208	41147
Han_Zhejiang	Han_Liaoning	Miao	Mbuti	0.000544	2.137	3222	3200	41147
Han_Zhejiang	Han_Liaoning	CHS.SG	Mbuti	0.000528	2.196	3230	3208	41147
Han_Zhejiang	Han_Liaoning	Han_Hubei	Mbuti	0.000668	2.487	3231	3204	41147
Han_Zhejiang	Han_Liaoning	Dong_Guizhou	Mbuti	0.000674	2.64	3226	3198	41147
Han_Zhejiang	Han_Liaoning	Zhuang	Mbuti	0.000653	2.659	3217	3191	41147
Han_Zhejiang	Han_Liaoning	Dong_Hunan	Mbuti	0.000762	2.959	3227	3196	41147
Han_Zhejiang	Han_Liaoning	China_Lahu	Mbuti	0.000782	3.053	3211	3179	41147
Han_Zhejiang	Han_Liaoning	Mulam	Mbuti	0.000766	3.097	3221	3190	41147
Han_Zhejiang	Han_Liaoning	Atayal	Mbuti	0.000896	3.128	3215	3178	41147
Han_Zhejiang	Han_Liaoning	Gelao	Mbuti	0.00081	3.186	3223	3189	41147
Han_Zhejiang	Han_Liaoning	Han_Guangdong	Mbuti	0.000968	3.665	3233	3193	41147
Han_Zhejiang	Han_Liaoning	Maonan	Mbuti	0.00093	3.684	3228	3189	41147
Han_Zhejiang	Han_Liaoning	Ami	Mbuti	0.001038	3.807	3227	3184	41147
Han_Zhejiang	Han_Liaoning	Li	Mbuti	0.001092	3.889	3232	3187	41147
Han_Zhejiang	Han_Liaoning	Dai	Mbuti	0.001003	3.968	3219	3178	41147

## Sheet: H
Supplementary Table 7H: The results of f4-statistics in the form of f4 (Han_Shanghai, Han_Liaoning; Modern population, Mbuti) based on HO merged dataset
Pop1 (W)	Pop2 (X)	Pop3 (Y)	Pop4 (Z)	D-stat	Z	BABA	ABBA	SNPs
Han_Shanghai	Han_Liaoning	Evenk_Transbaikal	Mbuti	0.000411	1.001	3178	3161	41054
Han_Shanghai	Han_Liaoning	Tibetan_Shannan	Mbuti	0.000546	1.367	3203	3180	41147
Han_Shanghai	Han_Liaoning	Mongola	Mbuti	0.000566	1.421	3205	3182	41147
Han_Shanghai	Han_Liaoning	Nanai	Mbuti	0.000612	1.523	3200	3175	41054
Han_Shanghai	Han_Liaoning	Tibetan_Lhasa	Mbuti	0.000633	1.556	3202	3176	41147
Han_Shanghai	Han_Liaoning	Tibetan_Shigatse	Mbuti	0.000634	1.576	3202	3176	41147
Han_Shanghai	Han_Liaoning	Tibetan_Nagqu	Mbuti	0.000677	1.659	3209	3182	41147
Han_Shanghai	Han_Liaoning	Sherpa	Mbuti	0.000752	1.779	3203	3172	41147
Han_Shanghai	Han_Liaoning	Oroqen	Mbuti	0.000704	1.78	3211	3182	41147
Han_Shanghai	Han_Liaoning	Yakut	Mbuti	0.000694	1.784	3186	3157	41147
Han_Shanghai	Han_Liaoning	Evenk_FarEast	Mbuti	0.000723	1.814	3172	3142	41054
Han_Shanghai	Han_Liaoning	Tibetan_Xunhua	Mbuti	0.000801	1.827	3209	3176	41147
Han_Shanghai	Han_Liaoning	Hezhen	Mbuti	0.000736	1.851	3212	3182	41147
Han_Shanghai	Han_Liaoning	Qiang_Daofu	Mbuti	0.000743	1.875	3218	3187	41147
Han_Shanghai	Han_Liaoning	Buryat	Mbuti	0.000708	1.901	3179	3150	41054
Han_Shanghai	Han_Liaoning	Ulchi	Mbuti	0.000793	2.001	3210	3177	41147
Han_Shanghai	Han_Liaoning	Kazakh	Mbuti	0.000735	2.041	3137	3107	41054
Han_Shanghai	Han_Liaoning	Tibetan_Chamdo	Mbuti	0.000816	2.07	3208	3174	41147
Han_Shanghai	Han_Liaoning	Even	Mbuti	0.000808	2.117	3154	3120	41147
Han_Shanghai	Han_Liaoning	Tibetan_Yunnan	Mbuti	0.000947	2.12	3222	3183	41147
Han_Shanghai	Han_Liaoning	Xibo	Mbuti	0.000866	2.136	3216	3180	41147
Han_Shanghai	Han_Liaoning	Kazakh_China	Mbuti	0.000826	2.166	3164	3130	41147
Han_Shanghai	Han_Liaoning	Kyrgyz_China	Mbuti	0.000788	2.21	3148	3116	41147
Han_Shanghai	Han_Liaoning	Iranian	Mbuti	0.000779	2.215	3018	2986	41147
Han_Shanghai	Han_Liaoning	Daur	Mbuti	0.000895	2.235	3214	3177	41147
Han_Shanghai	Han_Liaoning	Tu	Mbuti	0.000884	2.284	3207	3170	41147
Han_Shanghai	Han_Liaoning	Tajik	Mbuti	0.000821	2.291	3055	3021	41147
Han_Shanghai	Han_Liaoning	Salar	Mbuti	0.000926	2.302	3196	3158	41147
Han_Shanghai	Han_Liaoning	Turkish	Mbuti	0.000822	2.332	3032	2998	41147
Han_Shanghai	Han_Liaoning	Tibetan_Gannan	Mbuti	0.000976	2.342	3211	3170	41147
Han_Shanghai	Han_Liaoning	China_Lahu	Mbuti	0.000986	2.347	3210	3170	41147
Han_Shanghai	Han_Liaoning	Uyghur	Mbuti	0.00086	2.375	3126	3091	41147
Han_Shanghai	Han_Liaoning	Bonan	Mbuti	0.000934	2.384	3211	3172	41147
Han_Shanghai	Han_Liaoning	Tibetan_Yajiang	Mbuti	0.000952	2.393	3216	3177	41147
Han_Shanghai	Han_Liaoning	Han_Shanxi	Mbuti	0.000992	2.453	3229	3188	41147
Han_Shanghai	Han_Liaoning	Japanese	Mbuti	0.000944	2.465	3223	3184	41147
Han_Shanghai	Han_Liaoning	English	Mbuti	0.000939	2.492	3034	2996	41147
Han_Shanghai	Han_Liaoning	Spanish	Mbuti	0.000913	2.505	3026	2989	41147
Han_Shanghai	Han_Liaoning	Mongolian_FX	Mbuti	0.000959	2.534	3218	3179	41147
Han_Shanghai	Han_Liaoning	Li	Mbuti	0.001146	2.554	3227	3180	41147
Han_Shanghai	Han_Liaoning	She	Mbuti	0.001062	2.598	3231	3187	41147
Han_Shanghai	Han_Liaoning	Miao	Mbuti	0.001063	2.652	3230	3186	41147
Han_Shanghai	Han_Liaoning	Russian	Mbuti	0.000964	2.666	3047	3008	41147
Han_Shanghai	Han_Liaoning	Dongxiang	Mbuti	0.001032	2.676	3203	3160	41147
Han_Shanghai	Han_Liaoning	Tibetan_Xinlong	Mbuti	0.001042	2.68	3226	3183	41147
Han_Shanghai	Han_Liaoning	Naxi	Mbuti	0.001099	2.69	3227	3182	41147
Han_Shanghai	Han_Liaoning	Qiang_Danba	Mbuti	0.001077	2.694	3227	3182	41147
Han_Shanghai	Han_Liaoning	French	Mbuti	0.001007	2.787	3035	2994	41147
Han_Shanghai	Han_Liaoning	Yugur	Mbuti	0.001069	2.801	3220	3176	41147
Han_Shanghai	Han_Liaoning	Yi	Mbuti	0.001118	2.803	3224	3178	41147
Han_Shanghai	Han_Liaoning	Manchu_Liaoning	Mbuti	0.001079	2.86	3230	3185	41137
Han_Shanghai	Han_Liaoning	Han_Zhejiang	Mbuti	0.001202	2.89	3234	3185	41147
Han_Shanghai	Han_Liaoning	Uzbek	Mbuti	0.001002	2.897	3099	3058	41147
Han_Shanghai	Han_Liaoning	Han_Henan	Mbuti	0.001232	2.946	3237	3186	41147
Han_Shanghai	Han_Liaoning	Han_Shandong	Mbuti	0.001178	2.965	3236	3187	41147
Han_Shanghai	Han_Liaoning	Gelao	Mbuti	0.001218	2.982	3226	3176	41147
Han_Shanghai	Han_Liaoning	Han_Fujian	Mbuti	0.001243	3.017	3242	3191	41147
Han_Shanghai	Han_Liaoning	Tibetan_Gangcha	Mbuti	0.001177	3.097	3212	3163	41147
Han_Shanghai	Han_Liaoning	Korean	Mbuti	0.001269	3.1	3234	3182	41147
Han_Shanghai	Han_Liaoning	Dai	Mbuti	0.001288	3.141	3220	3167	41147
Han_Shanghai	Han_Liaoning	CHB.SG	Mbuti	0.001215	3.175	3242	3192	41147
Han_Shanghai	Han_Liaoning	Han_Chongqing	Mbuti	0.001421	3.177	3239	3181	41147
Han_Shanghai	Han_Liaoning	Han	Mbuti	0.001216	3.183	3231	3180	41147
Han_Shanghai	Han_Liaoning	Dong_Guizhou	Mbuti	0.001321	3.272	3236	3181	41147
Han_Shanghai	Han_Liaoning	Han_Hubei	Mbuti	0.001366	3.28	3241	3184	41147
Han_Shanghai	Han_Liaoning	Atayal	Mbuti	0.001464	3.319	3223	3163	41147
Han_Shanghai	Han_Liaoning	Han_Jiangsu	Mbuti	0.001374	3.406	3239	3182	41147
Han_Shanghai	Han_Liaoning	Dong_Hunan	Mbuti	0.001401	3.49	3237	3180	41147
Han_Shanghai	Han_Liaoning	CHS.SG	Mbuti	0.001347	3.499	3243	3188	41147
Han_Shanghai	Han_Liaoning	Han_Sichuan	Mbuti	0.001429	3.536	3234	3175	41147
Han_Shanghai	Han_Liaoning	Han_Guangdong	Mbuti	0.001521	3.672	3239	3177	41147
Han_Shanghai	Han_Liaoning	Mulam	Mbuti	0.001471	3.674	3233	3172	41147
Han_Shanghai	Han_Liaoning	Maonan	Mbuti	0.001536	3.77	3235	3172	41147
Han_Shanghai	Han_Liaoning	Zhuang	Mbuti	0.001504	3.785	3231	3169	41147
Han_Shanghai	Han_Liaoning	Ami	Mbuti	0.001617	3.879	3233	3167	41147

## Sheet: I
Supplementary Table 7I: The results of f4-statistics in the form of f4 (Han_Sichuan, Han_Liaoning; Modern population, Mbuti) based on HO merged dataset
Pop1 (W)	Pop2 (X)	Pop3 (Y)	Pop4 (Z)	D-stat	Z	BABA	ABBA	SNPs
Han_Sichuan	Han_Liaoning	Evenk_Transbaikal	Mbuti	-0.000955	-4.032	3156	3195	41054
Han_Sichuan	Han_Liaoning	Yakut	Mbuti	-0.00063	-2.903	3165	3191	41147
Han_Sichuan	Han_Liaoning	Ulchi	Mbuti	-0.000649	-2.844	3186	3213	41147
Han_Sichuan	Han_Liaoning	Kyrgyz_China	Mbuti	-0.000592	-2.799	3126	3151	41147
Han_Sichuan	Han_Liaoning	Even	Mbuti	-0.000612	-2.756	3131	3156	41147
Han_Sichuan	Han_Liaoning	Evenk_FarEast	Mbuti	-0.000608	-2.615	3151	3176	41054
Han_Sichuan	Han_Liaoning	Oroqen	Mbuti	-0.000582	-2.6	3189	3213	41147
Han_Sichuan	Han_Liaoning	Buryat	Mbuti	-0.000509	-2.408	3161	3181	41054
Han_Sichuan	Han_Liaoning	Uzbek	Mbuti	-0.000449	-2.287	3074	3093	41147
Han_Sichuan	Han_Liaoning	Tu	Mbuti	-0.000483	-2.248	3185	3205	41147
Han_Sichuan	Han_Liaoning	Hezhen	Mbuti	-0.000502	-2.191	3192	3213	41147
Han_Sichuan	Han_Liaoning	Nanai	Mbuti	-0.000489	-2.153	3184	3204	41054
Han_Sichuan	Han_Liaoning	Kazakh	Mbuti	-0.00043	-2.089	3118	3136	41054
Han_Sichuan	Han_Liaoning	Xibo	Mbuti	-0.000445	-2	3196	3214	41147
Han_Sichuan	Han_Liaoning	Tibetan_Shannan	Mbuti	-0.000447	-1.979	3189	3208	41147
Han_Sichuan	Han_Liaoning	Sherpa	Mbuti	-0.00047	-1.936	3184	3203	41147
Han_Sichuan	Han_Liaoning	Tibetan_Lhasa	Mbuti	-0.000437	-1.93	3187	3205	41147
Han_Sichuan	Han_Liaoning	Tibetan_Xunhua	Mbuti	-0.000479	-1.907	3191	3210	41147
Han_Sichuan	Han_Liaoning	Tibetan_Gannan	Mbuti	-0.000407	-1.822	3189	3205	41147
Han_Sichuan	Han_Liaoning	Daur	Mbuti	-0.000402	-1.81	3195	3211	41147
Han_Sichuan	Han_Liaoning	Tajik	Mbuti	-0.000343	-1.701	3036	3050	41147
Han_Sichuan	Han_Liaoning	Mongola	Mbuti	-0.000378	-1.688	3195	3210	41147
Han_Sichuan	Han_Liaoning	Tibetan_Chamdo	Mbuti	-0.00036	-1.655	3190	3205	41147
Han_Sichuan	Han_Liaoning	Bonan	Mbuti	-0.000323	-1.539	3192	3205	41147
Han_Sichuan	Han_Liaoning	Turkish	Mbuti	-0.000304	-1.497	3014	3026	41147
Han_Sichuan	Han_Liaoning	Iranian	Mbuti	-0.000301	-1.493	3001	3013	41147
Han_Sichuan	Han_Liaoning	Kazakh_China	Mbuti	-0.000327	-1.487	3146	3159	41147
Han_Sichuan	Han_Liaoning	Uyghur	Mbuti	-0.0003	-1.437	3108	3121	41147
Han_Sichuan	Han_Liaoning	Tibetan_Gangcha	Mbuti	-0.000313	-1.43	3186	3199	41147
Han_Sichuan	Han_Liaoning	Tibetan_Yunnan	Mbuti	-0.000346	-1.387	3200	3214	41147
Han_Sichuan	Han_Liaoning	Korean	Mbuti	-0.000307	-1.339	3207	3220	41147
Han_Sichuan	Han_Liaoning	Manchu_Liaoning	Mbuti	-0.000279	-1.329	3208	3220	41137
Han_Sichuan	Han_Liaoning	Tibetan_Shigatse	Mbuti	-0.000298	-1.323	3191	3203	41147
Han_Sichuan	Han_Liaoning	Qiang_Daofu	Mbuti	-0.000283	-1.266	3204	3216	41147
Han_Sichuan	Han_Liaoning	Russian	Mbuti	-0.000255	-1.217	3027	3038	41147
Han_Sichuan	Han_Liaoning	Mongolian_FX	Mbuti	-0.000254	-1.215	3200	3210	41147
Han_Sichuan	Han_Liaoning	French	Mbuti	-0.000243	-1.167	3014	3024	41147
Han_Sichuan	Han_Liaoning	Tibetan_Yajiang	Mbuti	-0.000236	-1.071	3199	3209	41147
Han_Sichuan	Han_Liaoning	English	Mbuti	-0.000237	-1.063	3015	3025	41147
Han_Sichuan	Han_Liaoning	Tibetan_Nagqu	Mbuti	-0.000237	-1.039	3196	3206	41147
Han_Sichuan	Han_Liaoning	Spanish	Mbuti	-0.00021	-1.006	3008	3017	41147
Han_Sichuan	Han_Liaoning	Han_Shandong	Mbuti	-0.00022	-1.005	3213	3222	41147
Han_Sichuan	Han_Liaoning	Salar	Mbuti	-0.000202	-0.915	3179	3187	41147
Han_Sichuan	Han_Liaoning	Han_Shanxi	Mbuti	-0.000197	-0.867	3211	3219	41147
Han_Sichuan	Han_Liaoning	Japanese	Mbuti	-0.000186	-0.856	3206	3214	41147
Han_Sichuan	Han_Liaoning	Naxi	Mbuti	-0.000173	-0.764	3207	3214	41147
Han_Sichuan	Han_Liaoning	Yugur	Mbuti	-0.000162	-0.759	3202	3208	41147
Han_Sichuan	Han_Liaoning	Dongxiang	Mbuti	-0.000148	-0.68	3185	3191	41147
Han_Sichuan	Han_Liaoning	Han_Zhejiang	Mbuti	-0.000136	-0.574	3213	3219	41147
Han_Sichuan	Han_Liaoning	Tibetan_Xinlong	Mbuti	-0.000115	-0.515	3208	3213	41147
Han_Sichuan	Han_Liaoning	Han_Hubei	Mbuti	-0.000107	-0.453	3219	3223	41147
Han_Sichuan	Han_Liaoning	CHB.SG	Mbuti	-8.2e-05	-0.385	3222	3225	41147
Han_Sichuan	Han_Liaoning	Han_Jiangsu	Mbuti	-5.5e-05	-0.244	3216	3219	41147
Han_Sichuan	Han_Liaoning	Yi	Mbuti	-4.9e-05	-0.224	3207	3209	41147
Han_Sichuan	Han_Liaoning	Qiang_Danba	Mbuti	-1e-05	-0.045	3212	3212	41147
Han_Sichuan	Han_Liaoning	Han_Henan	Mbuti	2e-06	0.011	3219	3219	41147
Han_Sichuan	Han_Liaoning	Han_Shanghai	Mbuti	0.000174	0.643	3234	3226	41147
Han_Sichuan	Han_Liaoning	Han_Chongqing	Mbuti	0.000161	0.66	3220	3213	41147
Han_Sichuan	Han_Liaoning	Han_Fujian	Mbuti	0.000211	0.899	3228	3220	41147
Han_Sichuan	Han_Liaoning	Han	Mbuti	0.00022	1.026	3217	3208	41147
Han_Sichuan	Han_Liaoning	CHS.SG	Mbuti	0.000272	1.259	3229	3217	41147
Han_Sichuan	Han_Liaoning	Han_Guangdong	Mbuti	0.000308	1.321	3222	3209	41147
Han_Sichuan	Han_Liaoning	She	Mbuti	0.000308	1.327	3225	3213	41147
Han_Sichuan	Han_Liaoning	Miao	Mbuti	0.000412	1.874	3224	3207	41147
Han_Sichuan	Han_Liaoning	China_Lahu	Mbuti	0.000563	2.461	3210	3187	41147
Han_Sichuan	Han_Liaoning	Dong_Guizhou	Mbuti	0.000635	2.807	3229	3203	41147
Han_Sichuan	Han_Liaoning	Zhuang	Mbuti	0.000713	3.203	3223	3194	41147
Han_Sichuan	Han_Liaoning	Gelao	Mbuti	0.000726	3.213	3225	3195	41147
Han_Sichuan	Han_Liaoning	Dong_Hunan	Mbuti	0.000719	3.254	3230	3201	41147
Han_Sichuan	Han_Liaoning	Atayal	Mbuti	0.000929	3.742	3221	3183	41147
Han_Sichuan	Han_Liaoning	Maonan	Mbuti	0.00086	3.839	3230	3195	41147
Han_Sichuan	Han_Liaoning	Dai	Mbuti	0.000891	3.912	3221	3184	41147
Han_Sichuan	Han_Liaoning	Li	Mbuti	0.000954	3.985	3233	3194	41147
Han_Sichuan	Han_Liaoning	Ami	Mbuti	0.000972	4.087	3229	3189	41147
Han_Sichuan	Han_Liaoning	Mulam	Mbuti	0.000904	4.088	3229	3192	41147

## Sheet: J
Supplementary Table 7J: The results of f4-statistics in the form of f4 (Han_Jiangsu, Han_Liaoning; Modern population, Mbuti) based on HO merged dataset
Pop1 (W)	Pop2 (X)	Pop3 (Y)	Pop4 (Z)	D-stat	Z	BABA	ABBA	SNPs
Han_Jiangsu	Han_Liaoning	Evenk_Transbaikal	Mbuti	-0.000224	-0.983	3170	3180	41054
Han_Jiangsu	Han_Liaoning	Even	Mbuti	-0.000183	-0.861	3138	3145	41147
Han_Jiangsu	Han_Liaoning	English	Mbuti	-0.000167	-0.815	3016	3023	41147
Han_Jiangsu	Han_Liaoning	Yakut	Mbuti	-0.000172	-0.791	3173	3180	41147
Han_Jiangsu	Han_Liaoning	Russian	Mbuti	-0.000151	-0.764	3028	3035	41147
Han_Jiangsu	Han_Liaoning	Uyghur	Mbuti	-0.000107	-0.533	3110	3115	41147
Han_Jiangsu	Han_Liaoning	Kazakh_China	Mbuti	-0.000107	-0.523	3149	3153	41147
Han_Jiangsu	Han_Liaoning	Kazakh	Mbuti	-0.0001	-0.513	3124	3128	41054
Han_Jiangsu	Han_Liaoning	French	Mbuti	-0.000101	-0.511	3016	3020	41147
Han_Jiangsu	Han_Liaoning	Spanish	Mbuti	-9.9e-05	-0.5	3010	3014	41147
Han_Jiangsu	Han_Liaoning	Turkish	Mbuti	-9.3e-05	-0.479	3018	3022	41147
Han_Jiangsu	Han_Liaoning	Buryat	Mbuti	-7.4e-05	-0.365	3168	3171	41054
Han_Jiangsu	Han_Liaoning	Oroqen	Mbuti	-8.1e-05	-0.354	3198	3202	41147
Han_Jiangsu	Han_Liaoning	Nanai	Mbuti	-7.8e-05	-0.349	3191	3194	41054
Han_Jiangsu	Han_Liaoning	Tibetan_Yajiang	Mbuti	-7.1e-05	-0.324	3199	3202	41147
Han_Jiangsu	Han_Liaoning	Uzbek	Mbuti	-5.5e-05	-0.293	3082	3084	41147
Han_Jiangsu	Han_Liaoning	Ulchi	Mbuti	-5.9e-05	-0.274	3197	3200	41147
Han_Jiangsu	Han_Liaoning	Tajik	Mbuti	-4.8e-05	-0.244	3042	3044	41147
Han_Jiangsu	Han_Liaoning	Iranian	Mbuti	-3.8e-05	-0.195	3006	3008	41147
Han_Jiangsu	Han_Liaoning	Sherpa	Mbuti	-4.5e-05	-0.19	3191	3193	41147
Han_Jiangsu	Han_Liaoning	Kyrgyz_China	Mbuti	-2.6e-05	-0.128	3137	3138	41147
Han_Jiangsu	Han_Liaoning	Qiang_Daofu	Mbuti	-2.4e-05	-0.11	3207	3208	41147
Han_Jiangsu	Han_Liaoning	Tibetan_Shannan	Mbuti	-2.4e-05	-0.106	3196	3197	41147
Han_Jiangsu	Han_Liaoning	Tibetan_Xunhua	Mbuti	-1.5e-05	-0.063	3198	3199	41147
Han_Jiangsu	Han_Liaoning	Xibo	Mbuti	-9e-06	-0.038	3203	3203	41147
Han_Jiangsu	Han_Liaoning	Tibetan_Lhasa	Mbuti	3e-06	0.014	3194	3194	41147
Han_Jiangsu	Han_Liaoning	Tibetan_Nagqu	Mbuti	5e-06	0.021	3199	3199	41147
Han_Jiangsu	Han_Liaoning	Tibetan_Chamdo	Mbuti	8e-06	0.036	3196	3196	41147
Han_Jiangsu	Han_Liaoning	Salar	Mbuti	1e-05	0.049	3182	3181	41147
Han_Jiangsu	Han_Liaoning	Daur	Mbuti	1.6e-05	0.071	3201	3201	41147
Han_Jiangsu	Han_Liaoning	Evenk_FarEast	Mbuti	3e-05	0.129	3163	3162	41054
Han_Jiangsu	Han_Liaoning	Tibetan_Gangcha	Mbuti	4.5e-05	0.214	3191	3190	41147
Han_Jiangsu	Han_Liaoning	Bonan	Mbuti	5.2e-05	0.244	3197	3195	41147
Han_Jiangsu	Han_Liaoning	Qiang_Danba	Mbuti	7.8e-05	0.343	3211	3207	41147
Han_Jiangsu	Han_Liaoning	Tibetan_Yunnan	Mbuti	0.000114	0.458	3208	3203	41147
Han_Jiangsu	Han_Liaoning	Mongola	Mbuti	0.000108	0.474	3203	3199	41147
Han_Jiangsu	Han_Liaoning	Korean	Mbuti	0.000113	0.492	3214	3209	41147
Han_Jiangsu	Han_Liaoning	Mongolian_FX	Mbuti	0.000107	0.519	3205	3201	41147
Han_Jiangsu	Han_Liaoning	Tibetan_Gannan	Mbuti	0.000125	0.55	3198	3193	41147
Han_Jiangsu	Han_Liaoning	Hezhen	Mbuti	0.000131	0.584	3205	3199	41147
Han_Jiangsu	Han_Liaoning	Yugur	Mbuti	0.000131	0.606	3206	3201	41147
Han_Jiangsu	Han_Liaoning	Tibetan_Xinlong	Mbuti	0.000146	0.676	3211	3205	41147
Han_Jiangsu	Han_Liaoning	Han_Shanxi	Mbuti	0.000149	0.686	3216	3210	41147
Han_Jiangsu	Han_Liaoning	Tibetan_Shigatse	Mbuti	0.000156	0.703	3198	3191	41147
Han_Jiangsu	Han_Liaoning	Han_Shandong	Mbuti	0.000194	0.871	3219	3211	41147
Han_Jiangsu	Han_Liaoning	Tu	Mbuti	0.000187	0.88	3197	3190	41147
Han_Jiangsu	Han_Liaoning	Han_Henan	Mbuti	0.000205	0.882	3220	3212	41147
Han_Jiangsu	Han_Liaoning	Miao	Mbuti	0.000205	0.925	3216	3207	41147
Han_Jiangsu	Han_Liaoning	Manchu_Liaoning	Mbuti	0.000197	0.943	3216	3208	41137
Han_Jiangsu	Han_Liaoning	Japanese	Mbuti	0.000224	1.044	3213	3203	41147
Han_Jiangsu	Han_Liaoning	Dongxiang	Mbuti	0.000229	1.046	3191	3181	41147
Han_Jiangsu	Han_Liaoning	Naxi	Mbuti	0.000261	1.181	3214	3203	41147
Han_Jiangsu	Han_Liaoning	Yi	Mbuti	0.000256	1.197	3211	3200	41147
Han_Jiangsu	Han_Liaoning	CHB.SG	Mbuti	0.000281	1.35	3227	3215	41147
Han_Jiangsu	Han_Liaoning	She	Mbuti	0.00032	1.462	3222	3209	41147
Han_Jiangsu	Han_Liaoning	Han_Zhejiang	Mbuti	0.000349	1.474	3222	3207	41147
Han_Jiangsu	Han_Liaoning	Han_Hubei	Mbuti	0.000386	1.635	3227	3211	41147
Han_Jiangsu	Han_Liaoning	Han_Sichuan	Mbuti	0.000374	1.664	3216	3201	41147
Han_Jiangsu	Han_Liaoning	Han_Chongqing	Mbuti	0.000425	1.7	3223	3206	41147
Han_Jiangsu	Han_Liaoning	Han	Mbuti	0.000361	1.731	3218	3203	41147
Han_Jiangsu	Han_Liaoning	Han_Shanghai	Mbuti	0.000548	2.078	3239	3216	41147
Han_Jiangsu	Han_Liaoning	Gelao	Mbuti	0.00046	2.124	3216	3197	41147
Han_Jiangsu	Han_Liaoning	CHS.SG	Mbuti	0.000449	2.149	3229	3211	41147
Han_Jiangsu	Han_Liaoning	China_Lahu	Mbuti	0.000518	2.292	3206	3185	41147
Han_Jiangsu	Han_Liaoning	Mulam	Mbuti	0.000546	2.585	3218	3196	41147
Han_Jiangsu	Han_Liaoning	Zhuang	Mbuti	0.000575	2.757	3216	3193	41147
Han_Jiangsu	Han_Liaoning	Han_Fujian	Mbuti	0.000665	2.861	3235	3207	41147
Han_Jiangsu	Han_Liaoning	Dong_Guizhou	Mbuti	0.000611	2.868	3225	3200	41147
Han_Jiangsu	Han_Liaoning	Dai	Mbuti	0.000606	2.886	3211	3186	41147
Han_Jiangsu	Han_Liaoning	Dong_Hunan	Mbuti	0.00066	3.022	3226	3199	41147
Han_Jiangsu	Han_Liaoning	Han_Guangdong	Mbuti	0.000677	3.04	3227	3199	41147
Han_Jiangsu	Han_Liaoning	Ami	Mbuti	0.000716	3.092	3221	3191	41147
Han_Jiangsu	Han_Liaoning	Maonan	Mbuti	0.000714	3.336	3224	3194	41147
Han_Jiangsu	Han_Liaoning	Li	Mbuti	0.000912	3.887	3230	3192	41147
Han_Jiangsu	Han_Liaoning	Atayal	Mbuti	0.000937	4.008	3217	3179	41147

[truncated: 17 more sheets: K, L, M, N, O, P, Q, R, S, T, U, V, W, X, Y, Z, A1]
