# Supplementary material for: Genetic structure and demographic history of Northern Han people in Liaoning Province inferred from genome-wide array data
Source: Frontiers journal article supplement (doi:10.3389/fevo.2022.1014024), 2022-11-03
Supplement: Table_8.XLSX [file Table_8.XLSX]

## Sheet: A
Supplementary Table 7A: The results of f4-statistics in the form of f4 (China_YR_MN, Han_Liaoning; Ancient population1, Mbuti) based on 1240k merged dataset
Pop1 (W)	Pop2 (X)	Pop3 (Y)	Pop4 (Z)	D-stat	Z	BABA	ABBA	SNPs
China_YR_MN	Han_Liaoning	China_WLR_BA	Mbuti.DG	-9.3e-05	-0.139	4471	4477	57306
China_YR_MN	Han_Liaoning	Iran_Wezmeh_N.SG	Mbuti.DG	-5.9e-05	-0.109	7776	7782	105899
China_YR_MN	Han_Liaoning	Taiwan_Hanben_IA	Mbuti.DG	-3e-05	-0.08	8236	8239	105301
China_YR_MN	Han_Liaoning	Russia_Andronovo.SG	Mbuti.DG	3.1e-05	0.067	7816	7813	105116
China_YR_MN	Han_Liaoning	Vietnam_N	Mbuti.DG	0.000264	0.274	1890	1883	24793
China_YR_MN	Han_Liaoning	Japan_Jomon.SG	Mbuti.DG	0.000183	0.296	6368	6353	82964
China_YR_MN	Han_Liaoning	Russia_DevilsCave_N.SG	Mbuti.DG	0.00026	0.532	8302	8274	105944
China_YR_MN	Han_Liaoning	Russia_Caucasus_EBA_Yamnaya	Mbuti.DG	0.000308	0.54	5384	5362	72122
China_YR_MN	Han_Liaoning	Taiwan_Gongguan	Mbuti.DG	0.000403	0.593	5205	5178	66412
China_YR_MN	Han_Liaoning	Iran_GanjDareh_N	Mbuti.DG	0.000269	0.611	7274	7247	98898
China_YR_MN	Han_Liaoning	China_AR_EN	Mbuti.DG	0.000557	0.628	2648	2629	33992
China_YR_MN	Han_Liaoning	Mongolia_LBA_MongunTaiga_3	Mbuti.DG	0.000308	0.67	7159	7130	94151
China_YR_MN	Han_Liaoning	Mongolia_Bulgan_Xiongnu	Mbuti.DG	0.000449	0.867	7271	7229	93139
China_YR_MN	Han_Liaoning	Russia_EarlyMedieval_Heshui_Mohe_1	Mbuti.DG	0.001011	0.991	2312	2282	29605
China_YR_MN	Han_Liaoning	Mongolia_EIA_2	Mbuti.DG	0.000646	1.053	5792	5743	76556
China_YR_MN	Han_Liaoning	China_SEastAsia_Coastal_LN	Mbuti.DG	0.000676	1.094	4996	4953	63841
China_YR_MN	Han_Liaoning	Russia_MLBA_Sintashta	Mbuti.DG	0.000421	1.112	7791	7747	104571
China_YR_MN	Han_Liaoning	China_AmurRiver_LPaleolithic	Mbuti.DG	0.000574	1.116	6557	6509	83611
China_YR_MN	Han_Liaoning	Mongolia_LBA_CenterWest_4	Mbuti.DG	0.000471	1.165	7834	7787	100717
China_YR_MN	Han_Liaoning	Mongolia_LBA_CenterWest_5	Mbuti.DG	0.000561	1.189	7466	7411	98412
China_YR_MN	Han_Liaoning	China_AmurRiver_EarlyN	Mbuti.DG	0.000712	1.194	5893	5840	74931
China_YR_MN	Han_Liaoning	Iran_TepeAbdulHosein_N.SG	Mbuti.DG	0.000589	1.203	7168	7110	97861
China_YR_MN	Han_Liaoning	Russia_Alan.SG	Mbuti.DG	0.000545	1.22	7809	7752	105246
China_YR_MN	Han_Liaoning	Mongolia_Arkhangai_XiongnuEarlyMedieval_2	Mbuti.DG	0.00068	1.332	6288	6231	84009
China_YR_MN	Han_Liaoning	Russia_Afanasievo	Mbuti.DG	0.000525	1.377	7785	7730	104107
China_YR_MN	Han_Liaoning	China_AmurRiver_Mesolithic	Mbuti.DG	0.000803	1.382	5572	5516	70652
China_YR_MN	Han_Liaoning	Mongolia_EIA_Pazyryk_6	Mbuti.DG	0.000849	1.443	5940	5874	78207
China_YR_MN	Han_Liaoning	Russia_Samara_EBA_Yamnaya	Mbuti.DG	0.000641	1.445	7606	7541	101722
China_YR_MN	Han_Liaoning	China_AR_Xianbei_IA	Mbuti.DG	0.0015	1.472	2106	2065	26730
China_YR_MN	Han_Liaoning	Hungary_LateC_EBA_Baden_Yamnaya	Mbuti.DG	0.000786	1.506	6145	6080	82693
China_YR_MN	Han_Liaoning	Mongolia_Tuv_Xiongnu	Mbuti.DG	0.00087	1.561	7377	7295	94217
China_YR_MN	Han_Liaoning	Russia_MN_Boisman	Mbuti.DG	0.000704	1.592	7484	7417	95204
China_YR_MN	Han_Liaoning	China_Upper_YR_IA	Mbuti.DG	0.000768	1.605	8006	7928	101837
China_YR_MN	Han_Liaoning	Mongolia_Uvs_EIAXiongnuLateMedival	Mbuti.DG	0.000688	1.727	7838	7767	103195
China_YR_MN	Han_Liaoning	Ukraine_EBA_Yamnaya	Mbuti.DG	0.001084	1.745	5739	5656	76819
China_YR_MN	Han_Liaoning	Mongolia_North_N	Mbuti.DG	0.00077	1.768	7732	7656	98863
China_YR_MN	Han_Liaoning	Laos_Hoabinhian.SG	Mbuti.DG	0.001429	1.814	3055	2996	41148
China_YR_MN	Han_Liaoning	China_WLR_LN	Mbuti.DG	0.001062	1.852	6910	6817	87516
China_YR_MN	Han_Liaoning	China_AmurRiver_N	Mbuti.DG	0.000923	1.881	6501	6424	82621
China_YR_MN	Han_Liaoning	Mongolia_Arkhangai_Xiongnu	Mbuti.DG	0.000813	1.887	7746	7663	102609
China_YR_MN	Han_Liaoning	Iran_Hasanlu_IA.SG	Mbuti.DG	0.001123	1.913	6786	6684	91300
China_YR_MN	Han_Liaoning	Nepal_Chokhopani_2800BP.SG	Mbuti.DG	0.001117	1.934	8307	8189	105766
China_YR_MN	Han_Liaoning	Russia_Kalmykia_EBA_Yamnaya.SG	Mbuti.DG	0.000894	1.936	7573	7482	101487
China_YR_MN	Han_Liaoning	Mongolia_Tuv_LatEMedieval	Mbuti.DG	0.000959	1.942	7331	7241	93309
China_YR_MN	Han_Liaoning	China_WLR_MN	Mbuti.DG	0.001024	2.034	8279	8171	105184
China_YR_MN	Han_Liaoning	Mongolia_LBA_Khovsgol_6	Mbuti.DG	0.000788	2.054	8063	7981	103935
China_YR_MN	Han_Liaoning	Mongolia_EBA_Ulgii_1	Mbuti.DG	0.000987	2.071	7369	7275	94933
China_YR_MN	Han_Liaoning	Mongolia_EIA_Sagly_4	Mbuti.DG	0.00078	2.123	7901	7820	103438
China_YR_MN	Han_Liaoning	Nepal_Mebrak_2125BP.SG	Mbuti.DG	0.001395	2.142	5523	5425	69939
China_YR_MN	Han_Liaoning	Vietnam_BA	Mbuti.DG	0.001993	2.212	2589	2523	32987
China_YR_MN	Han_Liaoning	China_Xinjian_IA.SG	Mbuti.DG	0.001331	2.277	5726	5626	74582
China_YR_MN	Han_Liaoning	China_SEastAsia_Coastal_EN	Mbuti.DG	0.002176	2.29	2472	2404	31520
China_YR_MN	Han_Liaoning	China_NEastAsia_Inland_EN	Mbuti.DG	0.001551	2.463	6398	6272	81240
China_YR_MN	Han_Liaoning	China_Tianyuan	Mbuti.DG	0.001479	2.466	6350	6227	83231
China_YR_MN	Han_Liaoning	Mongolia_Khentii_Xiongnu	Mbuti.DG	0.001511	2.539	6878	6746	87131
China_YR_MN	Han_Liaoning	Mongolia_East_N	Mbuti.DG	0.001341	2.549	7286	7162	92535
China_YR_MN	Han_Liaoning	China_Miaozigou_MN	Mbuti.DG	0.002402	2.566	2471	2396	31167
China_YR_MN	Han_Liaoning	Nepal_Samdzong_1500BP.SG	Mbuti.DG	0.001121	2.61	8306	8188	105939
China_YR_MN	Han_Liaoning	Mongolia_EIA_Xiongnu_7	Mbuti.DG	0.001567	2.628	6072	5951	77198
China_YR_MN	Han_Liaoning	Mongolia_EIA_SlabGrave_1	Mbuti.DG	0.001093	2.746	8075	7962	102748
China_YR_MN	Han_Liaoning	China_Shimao_LN	Mbuti.DG	0.001361	2.773	8268	8125	104667
China_YR_MN	Han_Liaoning	Luxembourg_Loschbour.DG	Mbuti.DG	0.001541	3.004	7505	7352	99601
China_YR_MN	Han_Liaoning	China_YR_LBIA	Mbuti.DG	0.00131	3.007	8313	8176	105217
China_YR_MN	Han_Liaoning	Russia_Buryatia_Xiongnu	Mbuti.DG	0.001355	3.135	7843	7708	99986
China_YR_MN	Han_Liaoning	China_NEastAsia_Coastal_EN	Mbuti.DG	0.001468	3.156	7733	7590	97667
China_YR_MN	Han_Liaoning	China_AmurRiver_Paleolithic	Mbuti.DG	0.001954	3.309	7126	6945	92948
China_YR_MN	Han_Liaoning	China_Upper_YR_LN	Mbuti.DG	0.001534	3.403	8313	8152	104882
China_YR_MN	Han_Liaoning	China_YR_LN	Mbuti.DG	0.00145	3.711	8375	8221	105880

## Sheet: B
Supplementary Table 7B: The results of f4-statistics in the form of f4 (China_YR_LN, Han_Liaoning; Ancient population1, Mbuti) based on 1240k merged dataset
Pop1 (W)	Pop2 (X)	Pop3 (Y)	Pop4 (Z)	D-stat	Z	BABA	ABBA	SNPs
China_YR_LN	Han_Liaoning	Russia_Andronovo.SG	Mbuti.DG	-0.000439	-1.457	7820	7867	105704
China_YR_LN	Han_Liaoning	Luxembourg_Loschbour.DG	Mbuti.DG	-0.000332	-0.944	7421	7455	100165
China_YR_LN	Han_Liaoning	Russia_Samara_EBA_Yamnaya	Mbuti.DG	-0.000259	-0.894	7589	7615	102265
China_YR_LN	Han_Liaoning	Iran_Hasanlu_IA.SG	Mbuti.DG	-0.000189	-0.466	6738	6755	91769
China_YR_LN	Han_Liaoning	Japan_Jomon.SG	Mbuti.DG	-0.000167	-0.389	6384	6398	83383
China_YR_LN	Han_Liaoning	Vietnam_BA	Mbuti.DG	-0.000183	-0.3	2554	2560	33069
China_YR_LN	Han_Liaoning	China_SEastAsia_Coastal_LN	Mbuti.DG	-8.9e-05	-0.215	4980	4986	64033
China_YR_LN	Han_Liaoning	Nepal_Chokhopani_2800BP.SG	Mbuti.DG	-7.4e-05	-0.19	8284	8291	106375
China_YR_LN	Han_Liaoning	Russia_Alan.SG	Mbuti.DG	-5.6e-05	-0.19	7809	7815	105849
China_YR_LN	Han_Liaoning	Ukraine_EBA_Yamnaya	Mbuti.DG	-2.5e-05	-0.062	5706	5708	77087
China_YR_LN	Han_Liaoning	China_WLR_BA	Mbuti.DG	-3e-06	-0.007	4483	4483	57543
China_YR_LN	Han_Liaoning	Mongolia_EIA_Pazyryk_6	Mbuti.DG	9e-06	0.023	5916	5916	78491
China_YR_LN	Han_Liaoning	Vietnam_N	Mbuti.DG	5.8e-05	0.085	1894	1892	24846
China_YR_LN	Han_Liaoning	Russia_EarlyMedieval_Heshui_Mohe_1	Mbuti.DG	0.000145	0.218	2299	2295	29689
China_YR_LN	Han_Liaoning	Mongolia_Tuv_Xiongnu	Mbuti.DG	0.000113	0.288	7369	7358	94663
China_YR_LN	Han_Liaoning	Taiwan_Gongguan	Mbuti.DG	0.000142	0.312	5208	5199	66595
China_YR_LN	Han_Liaoning	Mongolia_EIA_2	Mbuti.DG	0.000148	0.338	5785	5774	76819
China_YR_LN	Han_Liaoning	Mongolia_EBA_Ulgii_1	Mbuti.DG	0.000124	0.377	7351	7339	95347
China_YR_LN	Han_Liaoning	Mongolia_LBA_CenterWest_5	Mbuti.DG	0.000132	0.397	7480	7467	98910
China_YR_LN	Han_Liaoning	Mongolia_Arkhangai_Xiongnu	Mbuti.DG	0.00012	0.423	7751	7739	103156
China_YR_LN	Han_Liaoning	Iran_Wezmeh_N.SG	Mbuti.DG	0.000175	0.507	7830	7812	106513
China_YR_LN	Han_Liaoning	China_AR_EN	Mbuti.DG	0.00036	0.605	2657	2645	34113
China_YR_LN	Han_Liaoning	Russia_MLBA_Sintashta	Mbuti.DG	0.00017	0.652	7812	7794	105160
China_YR_LN	Han_Liaoning	Mongolia_LBA_MongunTaiga_3	Mbuti.DG	0.000243	0.734	7181	7158	94553
China_YR_LN	Han_Liaoning	China_Xinjian_IA.SG	Mbuti.DG	0.000295	0.773	5693	5671	74943
China_YR_LN	Han_Liaoning	China_AR_Xianbei_IA	Mbuti.DG	0.000521	0.801	2106	2092	26858
China_YR_LN	Han_Liaoning	Mongolia_East_N	Mbuti.DG	0.000329	0.864	7275	7244	92943
China_YR_LN	Han_Liaoning	Mongolia_EIA_Sagly_4	Mbuti.DG	0.000279	1.043	7910	7881	103995
China_YR_LN	Han_Liaoning	Mongolia_Khentii_Xiongnu	Mbuti.DG	0.000456	1.058	6853	6813	87491
China_YR_LN	Han_Liaoning	Mongolia_Uvs_EIAXiongnuLateMedival	Mbuti.DG	0.000304	1.078	7850	7818	103759
China_YR_LN	Han_Liaoning	Russia_Caucasus_EBA_Yamnaya	Mbuti.DG	0.0004	1.082	5393	5364	72357
China_YR_LN	Han_Liaoning	Mongolia_Arkhangai_XiongnuEarlyMedieval_2	Mbuti.DG	0.000418	1.147	6301	6266	84343
China_YR_LN	Han_Liaoning	Iran_TepeAbdulHosein_N.SG	Mbuti.DG	0.0004	1.262	7184	7145	98360
China_YR_LN	Han_Liaoning	Iran_GanjDareh_N	Mbuti.DG	0.000375	1.262	7314	7276	99357
China_YR_LN	Han_Liaoning	Mongolia_EIA_Xiongnu_7	Mbuti.DG	0.000589	1.309	6050	6005	77461
China_YR_LN	Han_Liaoning	Russia_Kalmykia_EBA_Yamnaya.SG	Mbuti.DG	0.000422	1.35	7576	7533	102024
China_YR_LN	Han_Liaoning	China_AmurRiver_LPaleolithic	Mbuti.DG	0.000494	1.371	6578	6536	83917
China_YR_LN	Han_Liaoning	Hungary_LateC_EBA_Baden_Yamnaya	Mbuti.DG	0.000453	1.372	6145	6107	82999
China_YR_LN	Han_Liaoning	Russia_Afanasievo	Mbuti.DG	0.000353	1.374	7808	7771	104671
China_YR_LN	Han_Liaoning	Russia_DevilsCave_N.SG	Mbuti.DG	0.000488	1.467	8363	8311	106556
China_YR_LN	Han_Liaoning	Mongolia_North_N	Mbuti.DG	0.000475	1.517	7745	7698	99327
China_YR_LN	Han_Liaoning	Mongolia_Bulgan_Xiongnu	Mbuti.DG	0.000606	1.64	7308	7252	93546
China_YR_LN	Han_Liaoning	Nepal_Samdzong_1500BP.SG	Mbuti.DG	0.000526	1.735	8326	8270	106548
China_YR_LN	Han_Liaoning	Mongolia_LBA_CenterWest_4	Mbuti.DG	0.000508	1.747	7878	7826	101229
China_YR_LN	Han_Liaoning	Mongolia_Tuv_LatEMedieval	Mbuti.DG	0.000576	1.75	7341	7287	93725
China_YR_LN	Han_Liaoning	China_Miaozigou_MN	Mbuti.DG	0.001036	1.761	2457	2425	31294
China_YR_LN	Han_Liaoning	Nepal_Mebrak_2125BP.SG	Mbuti.DG	0.000821	1.821	5537	5479	70261
China_YR_LN	Han_Liaoning	China_YR_LBIA	Mbuti.DG	0.000588	1.876	8312	8250	105811
China_YR_LN	Han_Liaoning	Russia_Buryatia_Xiongnu	Mbuti.DG	0.000596	1.888	7847	7788	100486
China_YR_LN	Han_Liaoning	China_NEastAsia_Inland_EN	Mbuti.DG	0.000851	1.898	6378	6308	81526
China_YR_LN	Han_Liaoning	Taiwan_Hanben_IA	Mbuti.DG	0.00054	1.923	8315	8258	105901
China_YR_LN	Han_Liaoning	Russia_MN_Boisman	Mbuti.DG	0.000637	1.954	7507	7446	95622
China_YR_LN	Han_Liaoning	Mongolia_LBA_Khovsgol_6	Mbuti.DG	0.000566	1.963	8089	8030	104489
China_YR_LN	Han_Liaoning	China_SEastAsia_Coastal_EN	Mbuti.DG	0.001323	2.069	2469	2427	31600
China_YR_LN	Han_Liaoning	China_AmurRiver_Mesolithic	Mbuti.DG	0.00087	2.22	5586	5525	70900
China_YR_LN	Han_Liaoning	China_WLR_MN	Mbuti.DG	0.000898	2.487	8311	8216	105772
China_YR_LN	Han_Liaoning	China_WLR_LN	Mbuti.DG	0.000986	2.494	6928	6841	87874
China_YR_LN	Han_Liaoning	Mongolia_EIA_SlabGrave_1	Mbuti.DG	0.000732	2.57	8094	8019	103278
China_YR_LN	Han_Liaoning	China_Tianyuan	Mbuti.DG	0.001075	2.6	6346	6257	83537
China_YR_LN	Han_Liaoning	China_Upper_YR_LN	Mbuti.DG	0.000834	2.601	8312	8224	105483
China_YR_LN	Han_Liaoning	China_Upper_YR_IA	Mbuti.DG	0.0009	2.67	8058	7966	102409
China_YR_LN	Han_Liaoning	China_AmurRiver_Paleolithic	Mbuti.DG	0.001069	2.687	7111	7012	93356
China_YR_LN	Han_Liaoning	China_AmurRiver_N	Mbuti.DG	0.000957	2.757	6520	6440	82937
China_YR_LN	Han_Liaoning	China_AmurRiver_EarlyN	Mbuti.DG	0.001145	2.817	5926	5840	75203
China_YR_LN	Han_Liaoning	China_Shimao_LN	Mbuti.DG	0.00112	3.176	8302	8184	105266
China_YR_LN	Han_Liaoning	Laos_Hoabinhian.SG	Mbuti.DG	0.001844	3.221	3091	3014	41351
China_YR_LN	Han_Liaoning	China_NEastAsia_Coastal_EN	Mbuti.DG	0.001134	3.466	7754	7643	98113
China_YR_LN	Han_Liaoning	China_YR_MN	Mbuti.DG	0.001289	3.919	8375	8238	105880

## Sheet: C
Supplementary Table 7C: The results of f4-statistics in the form of f4 (China_Upper_YR_LN, Han_Liaoning; Ancient population1, Mbuti) based on 1240k merged dataset
Pop1 (W)	Pop2 (X)	Pop3 (Y)	Pop4 (Z)	D-stat	Z	BABA	ABBA	SNPs
China_Upper_YR_LN	Han_Liaoning	Taiwan_Hanben_IA	Mbuti.DG	-0.000734	-2	8174	8251	104889
China_Upper_YR_LN	Han_Liaoning	Taiwan_Gongguan	Mbuti.DG	-0.001336	-1.994	5123	5211	66035
China_Upper_YR_LN	Han_Liaoning	Vietnam_BA	Mbuti.DG	-0.001169	-1.361	2531	2569	32831
China_Upper_YR_LN	Han_Liaoning	China_SEastAsia_Coastal_LN	Mbuti.DG	-0.000721	-1.286	4923	4969	63486
China_Upper_YR_LN	Han_Liaoning	Iran_Hasanlu_IA.SG	Mbuti.DG	-0.000578	-1.084	6680	6732	90955
China_Upper_YR_LN	Han_Liaoning	Vietnam_N	Mbuti.DG	-0.000594	-0.649	1884	1899	24650
China_Upper_YR_LN	Han_Liaoning	Ukraine_EBA_Yamnaya	Mbuti.DG	-0.000306	-0.558	5657	5680	76416
China_Upper_YR_LN	Han_Liaoning	Russia_EarlyMedieval_Heshui_Mohe_1	Mbuti.DG	-0.000469	-0.519	2282	2296	29454
China_Upper_YR_LN	Han_Liaoning	Hungary_LateC_EBA_Baden_Yamnaya	Mbuti.DG	-7e-05	-0.14	6085	6091	82262
China_Upper_YR_LN	Han_Liaoning	Mongolia_Arkhangai_XiongnuEarlyMedieval_2	Mbuti.DG	-4.8e-05	-0.097	6226	6230	83599
China_Upper_YR_LN	Han_Liaoning	Russia_Andronovo.SG	Mbuti.DG	6.6e-05	0.162	7793	7786	104712
China_Upper_YR_LN	Han_Liaoning	Russia_Alan.SG	Mbuti.DG	8.8e-05	0.215	7760	7750	104858
China_Upper_YR_LN	Han_Liaoning	Mongolia_EIA_2	Mbuti.DG	0.000339	0.563	5760	5735	76152
China_Upper_YR_LN	Han_Liaoning	Russia_MLBA_Sintashta	Mbuti.DG	0.000219	0.594	7758	7735	104137
China_Upper_YR_LN	Han_Liaoning	China_WLR_BA	Mbuti.DG	0.000446	0.69	4480	4454	57074
China_Upper_YR_LN	Han_Liaoning	China_YR_LBIA	Mbuti.DG	0.00029	0.727	8227	8197	104819
China_Upper_YR_LN	Han_Liaoning	Russia_Afanasievo	Mbuti.DG	0.000265	0.75	7744	7716	103686
China_Upper_YR_LN	Han_Liaoning	Iran_GanjDareh_N	Mbuti.DG	0.00035	0.856	7251	7217	98446
China_Upper_YR_LN	Han_Liaoning	China_AmurRiver_LPaleolithic	Mbuti.DG	0.000511	1.067	6530	6487	83174
China_Upper_YR_LN	Han_Liaoning	China_Miaozigou_MN	Mbuti.DG	0.001059	1.22	2434	2402	31059
China_Upper_YR_LN	Han_Liaoning	Iran_Wezmeh_N.SG	Mbuti.DG	0.000604	1.256	7799	7736	105512
China_Upper_YR_LN	Han_Liaoning	Russia_Caucasus_EBA_Yamnaya	Mbuti.DG	0.000702	1.331	5374	5324	71750
China_Upper_YR_LN	Han_Liaoning	Mongolia_Tuv_LatEMedieval	Mbuti.DG	0.000667	1.48	7296	7234	92881
China_Upper_YR_LN	Han_Liaoning	Mongolia_EIA_Xiongnu_7	Mbuti.DG	0.0009	1.516	6035	5966	76776
China_Upper_YR_LN	Han_Liaoning	Laos_Hoabinhian.SG	Mbuti.DG	0.001151	1.546	3062	3015	41006
China_Upper_YR_LN	Han_Liaoning	China_SEastAsia_Coastal_EN	Mbuti.DG	0.001369	1.597	2461	2419	31361
China_Upper_YR_LN	Han_Liaoning	Russia_Kalmykia_EBA_Yamnaya.SG	Mbuti.DG	0.000686	1.639	7541	7472	101083
China_Upper_YR_LN	Han_Liaoning	China_AmurRiver_Paleolithic	Mbuti.DG	0.000888	1.667	7047	6965	92494
China_Upper_YR_LN	Han_Liaoning	China_AR_Xianbei_IA	Mbuti.DG	0.001623	1.682	2123	2080	26644
China_Upper_YR_LN	Han_Liaoning	Mongolia_LBA_CenterWest_5	Mbuti.DG	0.0008	1.742	7455	7376	97988
China_Upper_YR_LN	Han_Liaoning	China_YR_LN	Mbuti.DG	0.000671	1.744	8312	8241	105483
China_Upper_YR_LN	Han_Liaoning	Luxembourg_Loschbour.DG	Mbuti.DG	0.000909	1.799	7448	7358	99233
China_Upper_YR_LN	Han_Liaoning	Japan_Jomon.SG	Mbuti.DG	0.001116	1.855	6398	6306	82645
China_Upper_YR_LN	Han_Liaoning	China_WLR_LN	Mbuti.DG	0.000989	1.933	6883	6797	87138
China_Upper_YR_LN	Han_Liaoning	Iran_TepeAbdulHosein_N.SG	Mbuti.DG	0.000886	1.945	7159	7072	97462
China_Upper_YR_LN	Han_Liaoning	Russia_Samara_EBA_Yamnaya	Mbuti.DG	0.000804	1.996	7592	7510	101300
China_Upper_YR_LN	Han_Liaoning	China_AR_EN	Mbuti.DG	0.002018	2.352	2661	2593	33868
China_Upper_YR_LN	Han_Liaoning	Mongolia_EIA_Pazyryk_6	Mbuti.DG	0.001439	2.386	5942	5830	77806
China_Upper_YR_LN	Han_Liaoning	Russia_MN_Boisman	Mbuti.DG	0.000995	2.391	7478	7384	94743
China_Upper_YR_LN	Han_Liaoning	China_NEastAsia_Coastal_EN	Mbuti.DG	0.00107	2.394	7696	7592	97196
China_Upper_YR_LN	Han_Liaoning	Nepal_Chokhopani_2800BP.SG	Mbuti.DG	0.001285	2.441	8303	8168	105379
China_Upper_YR_LN	Han_Liaoning	Mongolia_Bulgan_Xiongnu	Mbuti.DG	0.001169	2.453	7277	7169	92702
China_Upper_YR_LN	Han_Liaoning	Mongolia_Arkhangai_Xiongnu	Mbuti.DG	0.00095	2.454	7735	7638	102186
China_Upper_YR_LN	Han_Liaoning	Mongolia_Tuv_Xiongnu	Mbuti.DG	0.001317	2.475	7381	7257	93804
China_Upper_YR_LN	Han_Liaoning	China_Tianyuan	Mbuti.DG	0.001375	2.514	6330	6216	82804
China_Upper_YR_LN	Han_Liaoning	Russia_DevilsCave_N.SG	Mbuti.DG	0.001079	2.534	8325	8211	105557
China_Upper_YR_LN	Han_Liaoning	China_YR_MN	Mbuti.DG	0.001161	2.621	8313	8191	104882
China_Upper_YR_LN	Han_Liaoning	Nepal_Mebrak_2125BP.SG	Mbuti.DG	0.001694	2.702	5534	5416	69652
China_Upper_YR_LN	Han_Liaoning	China_WLR_MN	Mbuti.DG	0.001384	2.768	8274	8129	104791
China_Upper_YR_LN	Han_Liaoning	China_Upper_YR_IA	Mbuti.DG	0.001305	2.834	8030	7898	101472
China_Upper_YR_LN	Han_Liaoning	Mongolia_EIA_Sagly_4	Mbuti.DG	0.001039	2.856	7889	7782	102995
China_Upper_YR_LN	Han_Liaoning	Russia_Buryatia_Xiongnu	Mbuti.DG	0.001206	2.915	7815	7695	99550
China_Upper_YR_LN	Han_Liaoning	Mongolia_Uvs_EIAXiongnuLateMedival	Mbuti.DG	0.001161	2.973	7839	7720	102766
China_Upper_YR_LN	Han_Liaoning	China_AmurRiver_N	Mbuti.DG	0.001416	3.014	6502	6386	82190
China_Upper_YR_LN	Han_Liaoning	China_Xinjian_IA.SG	Mbuti.DG	0.001646	3.113	5715	5592	74287
China_Upper_YR_LN	Han_Liaoning	Mongolia_LBA_MongunTaiga_3	Mbuti.DG	0.001428	3.278	7188	7054	93688
China_Upper_YR_LN	Han_Liaoning	China_AmurRiver_Mesolithic	Mbuti.DG	0.001794	3.324	5591	5465	70270
China_Upper_YR_LN	Han_Liaoning	China_AmurRiver_EarlyN	Mbuti.DG	0.001828	3.357	5931	5795	74557
China_Upper_YR_LN	Han_Liaoning	Mongolia_Khentii_Xiongnu	Mbuti.DG	0.00202	3.569	6872	6697	86671
China_Upper_YR_LN	Han_Liaoning	China_Shimao_LN	Mbuti.DG	0.001757	3.663	8272	8089	104288
China_Upper_YR_LN	Han_Liaoning	China_NEastAsia_Inland_EN	Mbuti.DG	0.002354	4.008	6407	6217	80816
China_Upper_YR_LN	Han_Liaoning	Mongolia_LBA_Khovsgol_6	Mbuti.DG	0.001639	4.265	8094	7924	103500
China_Upper_YR_LN	Han_Liaoning	Mongolia_LBA_CenterWest_4	Mbuti.DG	0.001807	4.469	7893	7712	100269
China_Upper_YR_LN	Han_Liaoning	Mongolia_East_N	Mbuti.DG	0.002425	4.86	7323	7100	92100
China_Upper_YR_LN	Han_Liaoning	Mongolia_North_N	Mbuti.DG	0.002126	4.969	7783	7574	98407
China_Upper_YR_LN	Han_Liaoning	Nepal_Samdzong_1500BP.SG	Mbuti.DG	0.001996	5.01	8345	8134	105547
China_Upper_YR_LN	Han_Liaoning	Mongolia_EIA_SlabGrave_1	Mbuti.DG	0.002019	5.019	8105	7898	102290
China_Upper_YR_LN	Han_Liaoning	Mongolia_EBA_Ulgii_1	Mbuti.DG	0.00242	5.127	7425	7196	94471

## Sheet: D
Supplementary Table 7D: The results of f4-statistics in the form of f4 (China_Upper_YR_IA, Han_Liaoning; Ancient population1, Mbuti) based on 1240k merged dataset
Pop1 (W)	Pop2 (X)	Pop3 (Y)	Pop4 (Z)	D-stat	Z	BABA	ABBA	SNPs
China_Upper_YR_IA	Han_Liaoning	China_Tianyuan	Mbuti.DG	-0.000594	-0.877	6101	6149	81229
China_Upper_YR_IA	Han_Liaoning	China_AR_Xianbei_IA	Mbuti.DG	-0.000595	-0.536	2025	2040	26075
China_Upper_YR_IA	Han_Liaoning	Vietnam_N	Mbuti.DG	-0.000379	-0.366	1846	1855	24257
China_Upper_YR_IA	Han_Liaoning	China_AmurRiver_LPaleolithic	Mbuti.DG	-9.7e-05	-0.173	6369	6377	81529
China_Upper_YR_IA	Han_Liaoning	Taiwan_Hanben_IA	Mbuti.DG	-5.3e-05	-0.13	7974	7979	101880
China_Upper_YR_IA	Han_Liaoning	Russia_MN_Boisman	Mbuti.DG	-2.3e-05	-0.045	7235	7237	92599
China_Upper_YR_IA	Han_Liaoning	Laos_Hoabinhian.SG	Mbuti.DG	-1e-05	-0.011	2928	2929	39666
China_Upper_YR_IA	Han_Liaoning	Nepal_Mebrak_2125BP.SG	Mbuti.DG	1.8e-05	0.025	5321	5320	67800
China_Upper_YR_IA	Han_Liaoning	Mongolia_EIA_Pazyryk_6	Mbuti.DG	5.4e-05	0.078	5770	5765	76379
China_Upper_YR_IA	Han_Liaoning	Iran_Hasanlu_IA.SG	Mbuti.DG	7e-05	0.113	6533	6526	88494
China_Upper_YR_IA	Han_Liaoning	China_AmurRiver_N	Mbuti.DG	8e-05	0.153	6296	6289	80619
China_Upper_YR_IA	Han_Liaoning	China_NEastAsia_Inland_EN	Mbuti.DG	0.000127	0.191	6168	6158	79255
China_Upper_YR_IA	Han_Liaoning	Nepal_Chokhopani_2800BP.SG	Mbuti.DG	0.00013	0.221	7984	7971	102268
China_Upper_YR_IA	Han_Liaoning	China_WLR_BA	Mbuti.DG	0.00019	0.261	4370	4359	55847
China_Upper_YR_IA	Han_Liaoning	Russia_EarlyMedieval_Heshui_Mohe_1	Mbuti.DG	0.000318	0.298	2245	2236	28959
China_Upper_YR_IA	Han_Liaoning	Russia_DevilsCave_N.SG	Mbuti.DG	0.00016	0.303	8024	8008	102441
China_Upper_YR_IA	Han_Liaoning	Iran_Wezmeh_N.SG	Mbuti.DG	0.000176	0.304	7525	7507	102405
China_Upper_YR_IA	Han_Liaoning	Mongolia_Bulgan_Xiongnu	Mbuti.DG	0.000181	0.338	7057	7041	90520
China_Upper_YR_IA	Han_Liaoning	Russia_Afanasievo	Mbuti.DG	0.000149	0.36	7504	7489	100834
China_Upper_YR_IA	Han_Liaoning	Russia_Buryatia_Xiongnu	Mbuti.DG	0.000188	0.414	7552	7534	97018
China_Upper_YR_IA	Han_Liaoning	China_YR_MN	Mbuti.DG	0.000217	0.43	8006	7984	101837
China_Upper_YR_IA	Han_Liaoning	Mongolia_LBA_MongunTaiga_3	Mbuti.DG	0.000222	0.449	6958	6938	91615
China_Upper_YR_IA	Han_Liaoning	Mongolia_Tuv_Xiongnu	Mbuti.DG	0.000314	0.5	7140	7111	91545
China_Upper_YR_IA	Han_Liaoning	Mongolia_Arkhangai_XiongnuEarlyMedieval_2	Mbuti.DG	0.000323	0.571	6118	6091	81846
China_Upper_YR_IA	Han_Liaoning	Mongolia_Arkhangai_Xiongnu	Mbuti.DG	0.000307	0.667	7487	7457	99488
China_Upper_YR_IA	Han_Liaoning	Taiwan_Gongguan	Mbuti.DG	0.000552	0.728	5095	5059	64924
China_Upper_YR_IA	Han_Liaoning	Russia_Kalmykia_EBA_Yamnaya.SG	Mbuti.DG	0.000362	0.738	7304	7268	98365
China_Upper_YR_IA	Han_Liaoning	China_WLR_MN	Mbuti.DG	0.000464	0.807	7978	7931	101723
China_Upper_YR_IA	Han_Liaoning	China_NEastAsia_Coastal_EN	Mbuti.DG	0.000405	0.818	7472	7433	94903
China_Upper_YR_IA	Han_Liaoning	Mongolia_LBA_CenterWest_5	Mbuti.DG	0.000484	0.895	7245	7199	95575
China_Upper_YR_IA	Han_Liaoning	Nepal_Samdzong_1500BP.SG	Mbuti.DG	0.000417	0.896	7994	7952	102436
China_Upper_YR_IA	Han_Liaoning	Vietnam_BA	Mbuti.DG	0.000973	0.956	2506	2475	32265
China_Upper_YR_IA	Han_Liaoning	Luxembourg_Loschbour.DG	Mbuti.DG	0.000576	0.983	7223	7167	96522
China_Upper_YR_IA	Han_Liaoning	Ukraine_EBA_Yamnaya	Mbuti.DG	0.000688	1.035	5582	5530	75010
China_Upper_YR_IA	Han_Liaoning	China_YR_LN	Mbuti.DG	0.000461	1.038	8058	8010	102409
China_Upper_YR_IA	Han_Liaoning	China_Xinjian_IA.SG	Mbuti.DG	0.000672	1.107	5503	5454	72191
China_Upper_YR_IA	Han_Liaoning	China_SEastAsia_Coastal_LN	Mbuti.DG	0.000705	1.122	4876	4832	62343
China_Upper_YR_IA	Han_Liaoning	China_AmurRiver_Mesolithic	Mbuti.DG	0.000708	1.148	5450	5401	69114
China_Upper_YR_IA	Han_Liaoning	Russia_Andronovo.SG	Mbuti.DG	0.000542	1.16	7594	7539	101686
China_Upper_YR_IA	Han_Liaoning	Mongolia_Uvs_EIAXiongnuLateMedival	Mbuti.DG	0.00053	1.192	7585	7532	100002
China_Upper_YR_IA	Han_Liaoning	Mongolia_Tuv_LatEMedieval	Mbuti.DG	0.000638	1.222	7121	7063	90715
China_Upper_YR_IA	Han_Liaoning	Mongolia_EIA_Sagly_4	Mbuti.DG	0.000528	1.291	7641	7588	100232
China_Upper_YR_IA	Han_Liaoning	China_Miaozigou_MN	Mbuti.DG	0.001351	1.333	2385	2344	30345
China_Upper_YR_IA	Han_Liaoning	Mongolia_EIA_Xiongnu_7	Mbuti.DG	0.001	1.417	5913	5837	75398
China_Upper_YR_IA	Han_Liaoning	Russia_MLBA_Sintashta	Mbuti.DG	0.000577	1.418	7554	7495	101274
China_Upper_YR_IA	Han_Liaoning	Iran_GanjDareh_N	Mbuti.DG	0.000702	1.466	7085	7018	96038
China_Upper_YR_IA	Han_Liaoning	China_WLR_LN	Mbuti.DG	0.000915	1.578	6711	6633	85028
China_Upper_YR_IA	Han_Liaoning	China_YR_LBIA	Mbuti.DG	0.000724	1.593	8007	7933	101802
China_Upper_YR_IA	Han_Liaoning	China_Shimao_LN	Mbuti.DG	0.000869	1.611	7967	7879	101287
China_Upper_YR_IA	Han_Liaoning	Russia_Alan.SG	Mbuti.DG	0.00079	1.65	7546	7466	101759
China_Upper_YR_IA	Han_Liaoning	Mongolia_North_N	Mbuti.DG	0.000867	1.697	7513	7430	96049
China_Upper_YR_IA	Han_Liaoning	China_AmurRiver_EarlyN	Mbuti.DG	0.001101	1.736	5772	5691	73235
China_Upper_YR_IA	Han_Liaoning	Japan_Jomon.SG	Mbuti.DG	0.001229	1.762	6213	6115	80213
China_Upper_YR_IA	Han_Liaoning	Mongolia_EIA_SlabGrave_1	Mbuti.DG	0.000782	1.764	7814	7736	99622
China_Upper_YR_IA	Han_Liaoning	Mongolia_EIA_2	Mbuti.DG	0.001287	1.905	5689	5593	74741
China_Upper_YR_IA	Han_Liaoning	Mongolia_LBA_Khovsgol_6	Mbuti.DG	0.000808	1.939	7814	7733	100697
China_Upper_YR_IA	Han_Liaoning	Russia_Samara_EBA_Yamnaya	Mbuti.DG	0.000906	1.947	7391	7302	98647
China_Upper_YR_IA	Han_Liaoning	Mongolia_EBA_Ulgii_1	Mbuti.DG	0.001014	1.948	7157	7064	92342
China_Upper_YR_IA	Han_Liaoning	China_SEastAsia_Coastal_EN	Mbuti.DG	0.002022	2.001	2418	2356	30837
China_Upper_YR_IA	Han_Liaoning	Mongolia_LBA_CenterWest_4	Mbuti.DG	0.000894	2.011	7629	7541	97757
China_Upper_YR_IA	Han_Liaoning	China_AR_EN	Mbuti.DG	0.001995	2.034	2606	2540	33152
China_Upper_YR_IA	Han_Liaoning	Russia_Caucasus_EBA_Yamnaya	Mbuti.DG	0.001258	2.079	5292	5204	70473
China_Upper_YR_IA	Han_Liaoning	Iran_TepeAbdulHosein_N.SG	Mbuti.DG	0.001086	2.079	6968	6865	94751
China_Upper_YR_IA	Han_Liaoning	Mongolia_Khentii_Xiongnu	Mbuti.DG	0.001325	2.091	6664	6551	84839
China_Upper_YR_IA	Han_Liaoning	China_AmurRiver_Paleolithic	Mbuti.DG	0.001395	2.311	6904	6777	90447
China_Upper_YR_IA	Han_Liaoning	Mongolia_East_N	Mbuti.DG	0.001326	2.347	7093	6974	90034
China_Upper_YR_IA	Han_Liaoning	China_Upper_YR_LN	Mbuti.DG	0.001196	2.446	8030	7909	101472
China_Upper_YR_IA	Han_Liaoning	Hungary_LateC_EBA_Baden_Yamnaya	Mbuti.DG	0.001879	3.371	6052	5900	80634

## Sheet: E
Supplementary Table 7E: The results of f4-statistics in the form of f4 (China_Upper_YR_LBIA, Han_Liaoning; Ancient population1, Mbuti) based on 1240k merged dataset
Pop1 (W)	Pop2 (X)	Pop3 (Y)	Pop4 (Z)	D-stat	Z	BABA	ABBA	SNPs
China_YR_LBIA	Han_Liaoning	Japan_Jomon.SG	Mbuti.DG	-0.000652	-1.257	6312	6367	82891
China_YR_LBIA	Han_Liaoning	Vietnam_N	Mbuti.DG	-0.000506	-0.655	1883	1896	24820
China_YR_LBIA	Han_Liaoning	Iran_Hasanlu_IA.SG	Mbuti.DG	-9.9e-05	-0.218	6696	6705	91252
China_YR_LBIA	Han_Liaoning	Ukraine_EBA_Yamnaya	Mbuti.DG	0.000154	0.328	5684	5673	76851
China_YR_LBIA	Han_Liaoning	Nepal_Mebrak_2125BP.SG	Mbuti.DG	0.00021	0.396	5463	5448	69866
China_YR_LBIA	Han_Liaoning	Hungary_LateC_EBA_Baden_Yamnaya	Mbuti.DG	0.00019	0.465	6109	6093	82716
China_YR_LBIA	Han_Liaoning	Russia_Alan.SG	Mbuti.DG	0.00016	0.468	7748	7731	105167
China_YR_LBIA	Han_Liaoning	Russia_Caucasus_EBA_Yamnaya	Mbuti.DG	0.000225	0.5	5359	5343	72168
China_YR_LBIA	Han_Liaoning	China_WLR_BA	Mbuti.DG	0.000301	0.544	4470	4453	57325
China_YR_LBIA	Han_Liaoning	Mongolia_Arkhangai_Xiongnu	Mbuti.DG	0.000204	0.582	7694	7673	102599
China_YR_LBIA	Han_Liaoning	Russia_EarlyMedieval_Heshui_Mohe_1	Mbuti.DG	0.000444	0.588	2295	2282	29625
China_YR_LBIA	Han_Liaoning	Iran_Wezmeh_N.SG	Mbuti.DG	0.000285	0.673	7763	7732	105821
China_YR_LBIA	Han_Liaoning	Taiwan_Gongguan	Mbuti.DG	0.000374	0.697	5189	5164	66425
China_YR_LBIA	Han_Liaoning	Mongolia_EIA_2	Mbuti.DG	0.000368	0.759	5762	5734	76594
China_YR_LBIA	Han_Liaoning	China_Tianyuan	Mbuti.DG	0.000367	0.763	6287	6257	83268
China_YR_LBIA	Han_Liaoning	Mongolia_Arkhangai_XiongnuEarlyMedieval_2	Mbuti.DG	0.000327	0.785	6255	6227	84045
China_YR_LBIA	Han_Liaoning	China_AR_Xianbei_IA	Mbuti.DG	0.000648	0.811	2094	2076	26726
China_YR_LBIA	Han_Liaoning	Mongolia_Khentii_Xiongnu	Mbuti.DG	0.000389	0.859	6801	6767	87163
China_YR_LBIA	Han_Liaoning	Mongolia_Tuv_LatEMedieval	Mbuti.DG	0.000372	0.945	7280	7245	93334
China_YR_LBIA	Han_Liaoning	Mongolia_EIA_Xiongnu_7	Mbuti.DG	0.000507	0.975	6009	5970	77214
China_YR_LBIA	Han_Liaoning	China_NEastAsia_Inland_EN	Mbuti.DG	0.000522	1.025	6329	6287	81262
China_YR_LBIA	Han_Liaoning	Luxembourg_Loschbour.DG	Mbuti.DG	0.000431	1.08	7413	7370	99543
China_YR_LBIA	Han_Liaoning	Mongolia_North_N	Mbuti.DG	0.000413	1.136	7691	7650	98889
China_YR_LBIA	Han_Liaoning	Nepal_Samdzong_1500BP.SG	Mbuti.DG	0.000417	1.151	8241	8197	105859
China_YR_LBIA	Han_Liaoning	Russia_Kalmykia_EBA_Yamnaya.SG	Mbuti.DG	0.000443	1.161	7514	7469	101455
China_YR_LBIA	Han_Liaoning	Iran_TepeAbdulHosein_N.SG	Mbuti.DG	0.000456	1.195	7137	7093	97814
China_YR_LBIA	Han_Liaoning	Russia_Samara_EBA_Yamnaya	Mbuti.DG	0.000415	1.243	7567	7525	101730
China_YR_LBIA	Han_Liaoning	Russia_Andronovo.SG	Mbuti.DG	0.000472	1.29	7807	7758	105063
China_YR_LBIA	Han_Liaoning	Mongolia_East_N	Mbuti.DG	0.000573	1.327	7230	7177	92559
China_YR_LBIA	Han_Liaoning	Nepal_Chokhopani_2800BP.SG	Mbuti.DG	0.000665	1.445	8258	8187	105682
China_YR_LBIA	Han_Liaoning	Mongolia_Bulgan_Xiongnu	Mbuti.DG	0.000609	1.482	7242	7186	93144
China_YR_LBIA	Han_Liaoning	China_Shimao_LN	Mbuti.DG	0.000619	1.57	8200	8136	104621
China_YR_LBIA	Han_Liaoning	China_AmurRiver_EarlyN	Mbuti.DG	0.000744	1.575	5890	5834	74994
China_YR_LBIA	Han_Liaoning	China_WLR_LN	Mbuti.DG	0.000684	1.577	6875	6815	87473
China_YR_LBIA	Han_Liaoning	China_Upper_YR_LN	Mbuti.DG	0.000612	1.665	8227	8163	104819
China_YR_LBIA	Han_Liaoning	Mongolia_LBA_CenterWest_5	Mbuti.DG	0.00067	1.679	7450	7384	98432
China_YR_LBIA	Han_Liaoning	China_AmurRiver_Paleolithic	Mbuti.DG	0.000773	1.719	7048	6976	92977
China_YR_LBIA	Han_Liaoning	Russia_Afanasievo	Mbuti.DG	0.000545	1.756	7756	7699	104090
China_YR_LBIA	Han_Liaoning	Mongolia_Uvs_EIAXiongnuLateMedival	Mbuti.DG	0.000572	1.761	7809	7749	103190
China_YR_LBIA	Han_Liaoning	China_AR_EN	Mbuti.DG	0.001279	1.773	2659	2615	33988
China_YR_LBIA	Han_Liaoning	Mongolia_LBA_MongunTaiga_3	Mbuti.DG	0.000677	1.781	7161	7098	94182
China_YR_LBIA	Han_Liaoning	China_Miaozigou_MN	Mbuti.DG	0.001393	1.823	2438	2395	31153
China_YR_LBIA	Han_Liaoning	Russia_MLBA_Sintashta	Mbuti.DG	0.000564	1.831	7775	7716	104551
China_YR_LBIA	Han_Liaoning	Vietnam_BA	Mbuti.DG	0.001312	1.837	2572	2528	33001
China_YR_LBIA	Han_Liaoning	Mongolia_EIA_Sagly_4	Mbuti.DG	0.000532	1.843	7862	7807	103433
China_YR_LBIA	Han_Liaoning	Taiwan_Hanben_IA	Mbuti.DG	0.000647	2.01	8251	8183	105256
China_YR_LBIA	Han_Liaoning	Mongolia_EIA_Pazyryk_6	Mbuti.DG	0.000972	2.011	5923	5847	78244
China_YR_LBIA	Han_Liaoning	China_WLR_MN	Mbuti.DG	0.000869	2.046	8238	8147	105097
China_YR_LBIA	Han_Liaoning	Mongolia_Tuv_Xiongnu	Mbuti.DG	0.000961	2.066	7357	7266	94210
China_YR_LBIA	Han_Liaoning	China_YR_LN	Mbuti.DG	0.000704	2.083	8312	8237	105811
China_YR_LBIA	Han_Liaoning	Mongolia_EBA_Ulgii_1	Mbuti.DG	0.000885	2.29	7345	7261	94960
China_YR_LBIA	Han_Liaoning	Russia_Buryatia_Xiongnu	Mbuti.DG	0.000826	2.332	7794	7711	99995
China_YR_LBIA	Han_Liaoning	Iran_GanjDareh_N	Mbuti.DG	0.00085	2.388	7285	7201	98905
China_YR_LBIA	Han_Liaoning	China_SEastAsia_Coastal_LN	Mbuti.DG	0.001197	2.424	5008	4931	63860
China_YR_LBIA	Han_Liaoning	Mongolia_LBA_CenterWest_4	Mbuti.DG	0.000828	2.432	7833	7750	100747
China_YR_LBIA	Han_Liaoning	Mongolia_LBA_Khovsgol_6	Mbuti.DG	0.000765	2.444	8035	7955	103906
China_YR_LBIA	Han_Liaoning	China_AmurRiver_Mesolithic	Mbuti.DG	0.001142	2.446	5570	5489	70696
China_YR_LBIA	Han_Liaoning	China_AmurRiver_N	Mbuti.DG	0.001013	2.497	6490	6406	82650
China_YR_LBIA	Han_Liaoning	China_AmurRiver_LPaleolithic	Mbuti.DG	0.001083	2.536	6564	6474	83626
China_YR_LBIA	Han_Liaoning	Laos_Hoabinhian.SG	Mbuti.DG	0.001658	2.578	3060	2992	41102
China_YR_LBIA	Han_Liaoning	Russia_DevilsCave_N.SG	Mbuti.DG	0.001015	2.58	8318	8211	105864
China_YR_LBIA	Han_Liaoning	China_Xinjian_IA.SG	Mbuti.DG	0.001339	2.759	5693	5593	74507
China_YR_LBIA	Han_Liaoning	China_NEastAsia_Coastal_EN	Mbuti.DG	0.001114	2.986	7690	7581	97685
China_YR_LBIA	Han_Liaoning	Mongolia_EIA_SlabGrave_1	Mbuti.DG	0.001051	3.159	8047	7939	102737
China_YR_LBIA	Han_Liaoning	Russia_MN_Boisman	Mbuti.DG	0.001164	3.235	7481	7370	95233
China_YR_LBIA	Han_Liaoning	China_Upper_YR_IA	Mbuti.DG	0.001303	3.334	8007	7874	101802
China_YR_LBIA	Han_Liaoning	China_SEastAsia_Coastal_EN	Mbuti.DG	0.002564	3.526	2476	2395	31533
China_YR_LBIA	Han_Liaoning	China_YR_MN	Mbuti.DG	0.001384	3.555	8313	8168	105217

## Sheet: F
Supplementary Table 7F: The results of f4-statistics in the form of f4 (China_WLR_BA, Han_Liaoning; Ancient population1, Mbuti) based on 1240k merged dataset
Pop1 (W)	Pop2 (X)	Pop3 (Y)	Pop4 (Z)	D-stat	Z	BABA	ABBA	SNPs
China_WLR_BA	Han_Liaoning	China_Shimao_LN	Mbuti.DG	-0.001673	-1.953	4416	4511	57042
China_WLR_BA	Han_Liaoning	Taiwan_Gongguan	Mbuti.DG	-0.001557	-1.33	2999	3059	39039
China_WLR_BA	Han_Liaoning	China_Miaozigou_MN	Mbuti.DG	-0.001602	-0.971	1372	1401	17968
China_WLR_BA	Han_Liaoning	Nepal_Chokhopani_2800BP.SG	Mbuti.DG	-0.000763	-0.753	4459	4502	57434
China_WLR_BA	Han_Liaoning	China_YR_LN	Mbuti.DG	-0.000458	-0.642	4483	4509	57543
China_WLR_BA	Han_Liaoning	China_YR_MN	Mbuti.DG	-0.000509	-0.625	4471	4501	57306
China_WLR_BA	Han_Liaoning	Laos_Hoabinhian.SG	Mbuti.DG	-0.000689	-0.465	1625	1641	22424
China_WLR_BA	Han_Liaoning	Japan_Jomon.SG	Mbuti.DG	-0.000445	-0.43	3490	3510	45557
China_WLR_BA	Han_Liaoning	Iran_GanjDareh_N	Mbuti.DG	-0.000286	-0.384	4041	4057	55098
China_WLR_BA	Han_Liaoning	Taiwan_Hanben_IA	Mbuti.DG	-0.000243	-0.362	4470	4484	57390
China_WLR_BA	Han_Liaoning	China_YR_LBIA	Mbuti.DG	-0.000211	-0.288	4470	4482	57325
China_WLR_BA	Han_Liaoning	China_Upper_YR_IA	Mbuti.DG	-0.000235	-0.282	4370	4383	55847
China_WLR_BA	Han_Liaoning	China_SEastAsia_Coastal_LN	Mbuti.DG	-1.1e-05	-0.01	2916	2916	37457
China_WLR_BA	Han_Liaoning	China_Upper_YR_LN	Mbuti.DG	-7e-06	-0.008	4480	4480	57074
China_WLR_BA	Han_Liaoning	Vietnam_BA	Mbuti.DG	1.7e-05	0.011	1539	1539	19842
China_WLR_BA	Han_Liaoning	Nepal_Mebrak_2125BP.SG	Mbuti.DG	9.4e-05	0.079	3054	3051	38851
China_WLR_BA	Han_Liaoning	China_WLR_LN	Mbuti.DG	0.000166	0.174	3895	3886	49650
China_WLR_BA	Han_Liaoning	China_SEastAsia_Coastal_EN	Mbuti.DG	0.000271	0.175	1469	1464	18927
China_WLR_BA	Han_Liaoning	China_AmurRiver_Paleolithic	Mbuti.DG	0.000241	0.243	3968	3955	52407
China_WLR_BA	Han_Liaoning	China_Xinjian_IA.SG	Mbuti.DG	0.000476	0.461	3135	3115	41082
China_WLR_BA	Han_Liaoning	Mongolia_EIA_Pazyryk_6	Mbuti.DG	0.000496	0.463	3438	3415	45266
China_WLR_BA	Han_Liaoning	Mongolia_LBA_CenterWest_5	Mbuti.DG	0.000501	0.591	4154	4126	54691
China_WLR_BA	Han_Liaoning	Mongolia_LBA_MongunTaiga_3	Mbuti.DG	0.000494	0.609	4038	4011	53097
China_WLR_BA	Han_Liaoning	Nepal_Samdzong_1500BP.SG	Mbuti.DG	0.000458	0.621	4492	4466	57535
China_WLR_BA	Han_Liaoning	Russia_Caucasus_EBA_Yamnaya	Mbuti.DG	0.000587	0.628	3155	3130	42304
China_WLR_BA	Han_Liaoning	China_NEastAsia_Coastal_EN	Mbuti.DG	0.000559	0.687	4292	4262	54541
China_WLR_BA	Han_Liaoning	Ukraine_EBA_Yamnaya	Mbuti.DG	0.000949	0.885	3313	3270	44678
China_WLR_BA	Han_Liaoning	China_AR_Xianbei_IA	Mbuti.DG	0.00169	0.917	1211	1185	15180
China_WLR_BA	Han_Liaoning	Vietnam_N	Mbuti.DG	0.001864	1.019	1169	1141	15155
China_WLR_BA	Han_Liaoning	Mongolia_Arkhangai_XiongnuEarlyMedieval_2	Mbuti.DG	0.00101	1.071	3629	3580	48206
China_WLR_BA	Han_Liaoning	Iran_Hasanlu_IA.SG	Mbuti.DG	0.001083	1.079	3744	3690	50401
China_WLR_BA	Han_Liaoning	Mongolia_Bulgan_Xiongnu	Mbuti.DG	0.001033	1.133	4107	4053	52406
China_WLR_BA	Han_Liaoning	Mongolia_EBA_Ulgii_1	Mbuti.DG	0.00096	1.205	4144	4092	53479
China_WLR_BA	Han_Liaoning	Russia_Andronovo.SG	Mbuti.DG	0.000964	1.25	4270	4215	57283
China_WLR_BA	Han_Liaoning	Mongolia_EIA_2	Mbuti.DG	0.001399	1.282	3376	3314	44372
China_WLR_BA	Han_Liaoning	China_AmurRiver_Mesolithic	Mbuti.DG	0.001287	1.297	3274	3221	41407
China_WLR_BA	Han_Liaoning	Russia_MLBA_Sintashta	Mbuti.DG	0.000854	1.366	4249	4200	57164
China_WLR_BA	Han_Liaoning	Iran_Wezmeh_N.SG	Mbuti.DG	0.001387	1.44	4269	4189	57514
China_WLR_BA	Han_Liaoning	Russia_Alan.SG	Mbuti.DG	0.001124	1.532	4241	4177	57172
China_WLR_BA	Han_Liaoning	Iran_TepeAbdulHosein_N.SG	Mbuti.DG	0.001392	1.698	3948	3873	53863
China_WLR_BA	Han_Liaoning	Mongolia_LBA_CenterWest_4	Mbuti.DG	0.001195	1.712	4363	4297	55846
China_WLR_BA	Han_Liaoning	Mongolia_EIA_Sagly_4	Mbuti.DG	0.001066	1.749	4342	4281	56808
China_WLR_BA	Han_Liaoning	Mongolia_Tuv_Xiongnu	Mbuti.DG	0.001676	1.767	4129	4041	52623
China_WLR_BA	Han_Liaoning	Russia_Afanasievo	Mbuti.DG	0.001179	1.814	4276	4209	57024
China_WLR_BA	Han_Liaoning	China_Tianyuan	Mbuti.DG	0.001909	1.826	3686	3595	47852
China_WLR_BA	Han_Liaoning	Mongolia_EIA_Xiongnu_7	Mbuti.DG	0.001998	1.829	3538	3448	44787
China_WLR_BA	Han_Liaoning	Russia_EarlyMedieval_Heshui_Mohe_1	Mbuti.DG	0.003215	1.879	1388	1331	17658
China_WLR_BA	Han_Liaoning	Mongolia_Tuv_LatEMedieval	Mbuti.DG	0.001682	1.932	4139	4051	52535
China_WLR_BA	Han_Liaoning	Russia_Buryatia_Xiongnu	Mbuti.DG	0.001436	1.94	4349	4269	55500
China_WLR_BA	Han_Liaoning	China_AmurRiver_LPaleolithic	Mbuti.DG	0.001787	2.018	3773	3687	47923
China_WLR_BA	Han_Liaoning	Mongolia_Uvs_EIAXiongnuLateMedival	Mbuti.DG	0.001444	2.133	4328	4246	56732
China_WLR_BA	Han_Liaoning	Russia_Samara_EBA_Yamnaya	Mbuti.DG	0.001536	2.183	4203	4117	56081
China_WLR_BA	Han_Liaoning	Mongolia_Khentii_Xiongnu	Mbuti.DG	0.002311	2.186	3933	3819	49598
China_WLR_BA	Han_Liaoning	Mongolia_East_N	Mbuti.DG	0.002339	2.466	4125	4003	52144
China_WLR_BA	Han_Liaoning	Mongolia_Arkhangai_Xiongnu	Mbuti.DG	0.001836	2.52	4298	4195	56441
China_WLR_BA	Han_Liaoning	China_NEastAsia_Inland_EN	Mbuti.DG	0.0026	2.531	3709	3587	46947
China_WLR_BA	Han_Liaoning	Hungary_LateC_EBA_Baden_Yamnaya	Mbuti.DG	0.002189	2.533	3558	3454	47499
China_WLR_BA	Han_Liaoning	China_WLR_MN	Mbuti.DG	0.00222	2.536	4540	4413	57265
China_WLR_BA	Han_Liaoning	Luxembourg_Loschbour.DG	Mbuti.DG	0.002192	2.561	4107	3988	54431
China_WLR_BA	Han_Liaoning	Russia_DevilsCave_N.SG	Mbuti.DG	0.002111	2.621	4563	4442	57542
China_WLR_BA	Han_Liaoning	Russia_Kalmykia_EBA_Yamnaya.SG	Mbuti.DG	0.001955	2.634	4182	4072	55944
China_WLR_BA	Han_Liaoning	China_AmurRiver_EarlyN	Mbuti.DG	0.002748	2.639	3495	3375	43700
China_WLR_BA	Han_Liaoning	China_AR_EN	Mbuti.DG	0.00417	2.658	1574	1492	19777
China_WLR_BA	Han_Liaoning	Mongolia_North_N	Mbuti.DG	0.002131	2.894	4362	4244	55226
China_WLR_BA	Han_Liaoning	Mongolia_LBA_Khovsgol_6	Mbuti.DG	0.001894	2.904	4444	4336	56940
China_WLR_BA	Han_Liaoning	Mongolia_EIA_SlabGrave_1	Mbuti.DG	0.002026	2.949	4474	4360	56610
China_WLR_BA	Han_Liaoning	China_AmurRiver_N	Mbuti.DG	0.002547	3.013	3780	3659	47498
China_WLR_BA	Han_Liaoning	Russia_MN_Boisman	Mbuti.DG	0.003349	4.192	4290	4110	53596

## Sheet: G
Supplementary Table 7G: The results of f4-statistics in the form of f4 (China_WLR_MN, Han_Liaoning; Ancient population1, Mbuti) based on 1240k merged dataset
Pop1 (W)	Pop2 (X)	Pop3 (Y)	Pop4 (Z)	D-stat	Z	BABA	ABBA	SNPs
China_WLR_MN	Han_Liaoning	Taiwan_Hanben_IA	Mbuti.DG	-0.001471	-2.921	8177	8332	105191
China_WLR_MN	Han_Liaoning	Taiwan_Gongguan	Mbuti.DG	-0.0017	-2.072	5137	5250	66318
China_WLR_MN	Han_Liaoning	Iran_Hasanlu_IA.SG	Mbuti.DG	-0.00129	-1.757	6674	6792	91228
China_WLR_MN	Han_Liaoning	Vietnam_BA	Mbuti.DG	-0.00198	-1.735	2529	2594	32982
China_WLR_MN	Han_Liaoning	Nepal_Mebrak_2125BP.SG	Mbuti.DG	-0.001379	-1.667	5439	5535	69868
China_WLR_MN	Han_Liaoning	China_SEastAsia_Coastal_LN	Mbuti.DG	-0.000893	-1.194	4948	5005	63775
China_WLR_MN	Han_Liaoning	Nepal_Chokhopani_2800BP.SG	Mbuti.DG	-0.000407	-0.587	8234	8277	105668
China_WLR_MN	Han_Liaoning	China_YR_LBIA	Mbuti.DG	-0.000284	-0.509	8238	8268	105097
China_WLR_MN	Han_Liaoning	Japan_Jomon.SG	Mbuti.DG	-0.000239	-0.305	6386	6406	82890
China_WLR_MN	Han_Liaoning	China_YR_MN	Mbuti.DG	-0.000144	-0.244	8279	8294	105184
China_WLR_MN	Han_Liaoning	China_Shimao_LN	Mbuti.DG	-0.000141	-0.223	8204	8219	104569
China_WLR_MN	Han_Liaoning	China_YR_LN	Mbuti.DG	-7.5e-05	-0.151	8311	8319	105772
China_WLR_MN	Han_Liaoning	China_Upper_YR_IA	Mbuti.DG	-8.3e-05	-0.133	7978	7986	101723
China_WLR_MN	Han_Liaoning	Nepal_Samdzong_1500BP.SG	Mbuti.DG	-6.3e-05	-0.115	8262	8269	105838
China_WLR_MN	Han_Liaoning	Mongolia_LBA_MongunTaiga_3	Mbuti.DG	3.9e-05	0.067	7161	7157	93995
China_WLR_MN	Han_Liaoning	Mongolia_LBA_CenterWest_5	Mbuti.DG	0.000106	0.175	7452	7441	98285
China_WLR_MN	Han_Liaoning	Hungary_LateC_EBA_Baden_Yamnaya	Mbuti.DG	0.000211	0.338	6127	6110	82560
China_WLR_MN	Han_Liaoning	Russia_MLBA_Sintashta	Mbuti.DG	0.00024	0.503	7795	7770	104438
China_WLR_MN	Han_Liaoning	Iran_TepeAbdulHosein_N.SG	Mbuti.DG	0.000297	0.513	7174	7145	97758
China_WLR_MN	Han_Liaoning	Laos_Hoabinhian.SG	Mbuti.DG	0.000623	0.609	3058	3032	41125
China_WLR_MN	Han_Liaoning	Russia_Andronovo.SG	Mbuti.DG	0.000358	0.642	7844	7807	105006
China_WLR_MN	Han_Liaoning	Russia_Alan.SG	Mbuti.DG	0.000405	0.75	7804	7761	105156
China_WLR_MN	Han_Liaoning	Russia_Caucasus_EBA_Yamnaya	Mbuti.DG	0.000532	0.782	5393	5354	72041
China_WLR_MN	Han_Liaoning	Vietnam_N	Mbuti.DG	0.001129	0.916	1912	1884	24787
China_WLR_MN	Han_Liaoning	China_Tianyuan	Mbuti.DG	0.000723	0.945	6319	6259	83103
China_WLR_MN	Han_Liaoning	China_Miaozigou_MN	Mbuti.DG	0.001093	0.956	2445	2411	31125
China_WLR_MN	Han_Liaoning	China_Upper_YR_LN	Mbuti.DG	0.000558	0.989	8274	8216	104791
China_WLR_MN	Han_Liaoning	Iran_GanjDareh_N	Mbuti.DG	0.000584	1.079	7302	7244	98754
China_WLR_MN	Han_Liaoning	Russia_Samara_EBA_Yamnaya	Mbuti.DG	0.00061	1.148	7616	7554	101589
China_WLR_MN	Han_Liaoning	Ukraine_EBA_Yamnaya	Mbuti.DG	0.00086	1.178	5743	5677	76740
China_WLR_MN	Han_Liaoning	China_WLR_LN	Mbuti.DG	0.000821	1.201	6920	6848	87421
China_WLR_MN	Han_Liaoning	Mongolia_Arkhangai_XiongnuEarlyMedieval_2	Mbuti.DG	0.00084	1.295	6298	6227	83895
China_WLR_MN	Han_Liaoning	Iran_Wezmeh_N.SG	Mbuti.DG	0.000963	1.409	7855	7753	105802
China_WLR_MN	Han_Liaoning	Mongolia_EIA_2	Mbuti.DG	0.001104	1.449	5813	5729	76446
China_WLR_MN	Han_Liaoning	Russia_Kalmykia_EBA_Yamnaya.SG	Mbuti.DG	0.000821	1.46	7579	7495	101379
China_WLR_MN	Han_Liaoning	Mongolia_Arkhangai_Xiongnu	Mbuti.DG	0.000807	1.528	7770	7688	102476
China_WLR_MN	Han_Liaoning	Russia_Afanasievo	Mbuti.DG	0.000735	1.551	7805	7729	103963
China_WLR_MN	Han_Liaoning	China_SEastAsia_Coastal_EN	Mbuti.DG	0.001873	1.629	2471	2412	31490
China_WLR_MN	Han_Liaoning	China_WLR_BA	Mbuti.DG	0.001421	1.663	4540	4459	57265
China_WLR_MN	Han_Liaoning	China_Xinjian_IA.SG	Mbuti.DG	0.001258	1.745	5722	5628	74493
China_WLR_MN	Han_Liaoning	China_AmurRiver_EarlyN	Mbuti.DG	0.001468	2.049	5949	5839	74841
China_WLR_MN	Han_Liaoning	Mongolia_Tuv_Xiongnu	Mbuti.DG	0.001549	2.171	7419	7273	94099
China_WLR_MN	Han_Liaoning	China_AR_Xianbei_IA	Mbuti.DG	0.002723	2.185	2136	2064	26705
China_WLR_MN	Han_Liaoning	China_AR_EN	Mbuti.DG	0.002442	2.204	2698	2615	33942
China_WLR_MN	Han_Liaoning	Russia_EarlyMedieval_Heshui_Mohe_1	Mbuti.DG	0.002631	2.305	2333	2255	29588
China_WLR_MN	Han_Liaoning	Luxembourg_Loschbour.DG	Mbuti.DG	0.001499	2.323	7523	7374	99526
China_WLR_MN	Han_Liaoning	Mongolia_Bulgan_Xiongnu	Mbuti.DG	0.001536	2.345	7333	7190	93022
China_WLR_MN	Han_Liaoning	Mongolia_Tuv_LatEMedieval	Mbuti.DG	0.001397	2.356	7369	7239	93166
China_WLR_MN	Han_Liaoning	Mongolia_Uvs_EIAXiongnuLateMedival	Mbuti.DG	0.001348	2.657	7889	7750	103072
China_WLR_MN	Han_Liaoning	China_AmurRiver_LPaleolithic	Mbuti.DG	0.001757	2.738	6626	6480	83474
China_WLR_MN	Han_Liaoning	Mongolia_EIA_Xiongnu_7	Mbuti.DG	0.002227	2.801	6130	5958	77082
China_WLR_MN	Han_Liaoning	Mongolia_EIA_Sagly_4	Mbuti.DG	0.001335	2.803	7945	7807	103299
China_WLR_MN	Han_Liaoning	China_AmurRiver_Paleolithic	Mbuti.DG	0.00223	3.009	7143	6936	92817
China_WLR_MN	Han_Liaoning	Mongolia_EIA_Pazyryk_6	Mbuti.DG	0.002466	3.176	6006	5813	78105
China_WLR_MN	Han_Liaoning	Russia_DevilsCave_N.SG	Mbuti.DG	0.002285	3.88	8451	8210	105847
China_WLR_MN	Han_Liaoning	Mongolia_LBA_CenterWest_4	Mbuti.DG	0.00217	4.056	7950	7732	100581
China_WLR_MN	Han_Liaoning	Russia_Buryatia_Xiongnu	Mbuti.DG	0.002401	4.304	7935	7695	99862
China_WLR_MN	Han_Liaoning	Russia_MN_Boisman	Mbuti.DG	0.002463	4.317	7594	7359	95056
China_WLR_MN	Han_Liaoning	China_AmurRiver_Mesolithic	Mbuti.DG	0.002993	4.387	5673	5461	70560
China_WLR_MN	Han_Liaoning	Mongolia_Khentii_Xiongnu	Mbuti.DG	0.003374	4.57	6982	6689	86981
China_WLR_MN	Han_Liaoning	Mongolia_EBA_Ulgii_1	Mbuti.DG	0.002914	4.821	7482	7205	94786
China_WLR_MN	Han_Liaoning	China_AmurRiver_N	Mbuti.DG	0.002972	4.872	6615	6370	82485
China_WLR_MN	Han_Liaoning	China_NEastAsia_Inland_EN	Mbuti.DG	0.003957	4.977	6512	6191	81137
China_WLR_MN	Han_Liaoning	Mongolia_LBA_Khovsgol_6	Mbuti.DG	0.002568	5.35	8186	7920	103799
China_WLR_MN	Han_Liaoning	China_NEastAsia_Coastal_EN	Mbuti.DG	0.003222	5.548	7851	7537	97521
China_WLR_MN	Han_Liaoning	Mongolia_EIA_SlabGrave_1	Mbuti.DG	0.003173	6.337	8219	7893	102587
China_WLR_MN	Han_Liaoning	Mongolia_North_N	Mbuti.DG	0.003689	6.381	7909	7545	98706
China_WLR_MN	Han_Liaoning	Mongolia_East_N	Mbuti.DG	0.004592	6.907	7471	7046	92416

## Sheet: H
Supplementary Table 7H: The results of f4-statistics in the form of f4 (China_WLR_LN, Han_Liaoning; Ancient population1, Mbuti) based on 1240k merged dataset
Pop1 (W)	Pop2 (X)	Pop3 (Y)	Pop4 (Z)	D-stat	Z	BABA	ABBA	SNPs
China_WLR_LN	Han_Liaoning	Japan_Jomon.SG	Mbuti.DG	-0.000958	-1.138	5278	5345	69384
China_WLR_LN	Han_Liaoning	Iran_Wezmeh_N.SG	Mbuti.DG	-0.000457	-0.639	6412	6452	87858
China_WLR_LN	Han_Liaoning	Russia_Alan.SG	Mbuti.DG	-0.000279	-0.482	6413	6438	87313
China_WLR_LN	Han_Liaoning	Iran_TepeAbdulHosein_N.SG	Mbuti.DG	-0.00017	-0.26	5963	5977	82191
China_WLR_LN	Han_Liaoning	Taiwan_Gongguan	Mbuti.DG	-0.000208	-0.228	4592	4604	58651
China_WLR_LN	Han_Liaoning	China_Xinjian_IA.SG	Mbuti.DG	-2.5e-05	-0.033	4732	4733	62530
China_WLR_LN	Han_Liaoning	Ukraine_EBA_Yamnaya	Mbuti.DG	0.000109	0.138	4954	4947	67250
China_WLR_LN	Han_Liaoning	Hungary_LateC_EBA_Baden_Yamnaya	Mbuti.DG	0.000116	0.17	5298	5289	71794
China_WLR_LN	Han_Liaoning	Russia_EarlyMedieval_Heshui_Mohe_1	Mbuti.DG	0.00027	0.221	2018	2011	26297
China_WLR_LN	Han_Liaoning	Iran_GanjDareh_N	Mbuti.DG	0.00015	0.253	6153	6141	83899
China_WLR_LN	Han_Liaoning	Mongolia_EIA_Pazyryk_6	Mbuti.DG	0.000238	0.296	5138	5122	68180
China_WLR_LN	Han_Liaoning	Russia_Caucasus_EBA_Yamnaya	Mbuti.DG	0.000261	0.36	4722	4705	63668
China_WLR_LN	Han_Liaoning	Mongolia_Arkhangai_Xiongnu	Mbuti.DG	0.000204	0.369	6454	6436	86082
China_WLR_LN	Han_Liaoning	China_AR_Xianbei_IA	Mbuti.DG	0.000638	0.447	1794	1779	22958
China_WLR_LN	Han_Liaoning	Mongolia_Arkhangai_XiongnuEarlyMedieval_2	Mbuti.DG	0.000339	0.501	5412	5387	72751
China_WLR_LN	Han_Liaoning	China_AmurRiver_EarlyN	Mbuti.DG	0.000406	0.511	5144	5117	65485
China_WLR_LN	Han_Liaoning	China_SEastAsia_Coastal_EN	Mbuti.DG	0.000725	0.577	2199	2178	28287
China_WLR_LN	Han_Liaoning	Luxembourg_Loschbour.DG	Mbuti.DG	0.000473	0.684	6187	6148	83000
China_WLR_LN	Han_Liaoning	Mongolia_EIA_2	Mbuti.DG	0.000565	0.695	5015	4977	66818
China_WLR_LN	Han_Liaoning	Nepal_Chokhopani_2800BP.SG	Mbuti.DG	0.00056	0.727	6855	6806	87728
China_WLR_LN	Han_Liaoning	China_Tianyuan	Mbuti.DG	0.000698	0.852	5460	5410	72133
China_WLR_LN	Han_Liaoning	China_AmurRiver_LPaleolithic	Mbuti.DG	0.00067	0.955	5664	5616	72284
China_WLR_LN	Han_Liaoning	Mongolia_Khentii_Xiongnu	Mbuti.DG	0.000867	1.107	5863	5798	74957
China_WLR_LN	Han_Liaoning	Iran_Hasanlu_IA.SG	Mbuti.DG	0.000905	1.128	5673	5604	76753
China_WLR_LN	Han_Liaoning	Russia_Andronovo.SG	Mbuti.DG	0.000682	1.146	6504	6444	87496
China_WLR_LN	Han_Liaoning	Mongolia_LBA_MongunTaiga_3	Mbuti.DG	0.000684	1.148	6115	6060	80479
China_WLR_LN	Han_Liaoning	Nepal_Mebrak_2125BP.SG	Mbuti.DG	0.001074	1.155	4677	4613	59162
China_WLR_LN	Han_Liaoning	China_AmurRiver_Mesolithic	Mbuti.DG	0.000904	1.191	4888	4832	62107
China_WLR_LN	Han_Liaoning	China_WLR_BA	Mbuti.DG	0.001131	1.245	3895	3839	49650
China_WLR_LN	Han_Liaoning	Russia_MLBA_Sintashta	Mbuti.DG	0.000626	1.248	6485	6431	87259
China_WLR_LN	Han_Liaoning	Mongolia_LBA_CenterWest_5	Mbuti.DG	0.000835	1.264	6307	6237	83229
China_WLR_LN	Han_Liaoning	Russia_DevilsCave_N.SG	Mbuti.DG	0.000834	1.266	6900	6827	87886
China_WLR_LN	Han_Liaoning	Russia_Kalmykia_EBA_Yamnaya.SG	Mbuti.DG	0.000747	1.266	6326	6263	85283
China_WLR_LN	Han_Liaoning	Russia_Samara_EBA_Yamnaya	Mbuti.DG	0.000725	1.282	6374	6312	85437
China_WLR_LN	Han_Liaoning	Russia_Afanasievo	Mbuti.DG	0.000655	1.282	6493	6436	87051
China_WLR_LN	Han_Liaoning	China_NEastAsia_Inland_EN	Mbuti.DG	0.001108	1.332	5554	5475	71002
China_WLR_LN	Han_Liaoning	China_AR_EN	Mbuti.DG	0.001668	1.353	2315	2266	29437
China_WLR_LN	Han_Liaoning	Taiwan_Hanben_IA	Mbuti.DG	0.000753	1.409	6890	6824	87664
China_WLR_LN	Han_Liaoning	Mongolia_EIA_Sagly_4	Mbuti.DG	0.000693	1.417	6584	6524	86699
China_WLR_LN	Han_Liaoning	China_YR_LBIA	Mbuti.DG	0.000807	1.422	6875	6804	87473
China_WLR_LN	Han_Liaoning	Mongolia_East_N	Mbuti.DG	0.001026	1.425	6216	6135	79144
China_WLR_LN	Han_Liaoning	Laos_Hoabinhian.SG	Mbuti.DG	0.001701	1.494	2564	2505	34364
China_WLR_LN	Han_Liaoning	Mongolia_EBA_Ulgii_1	Mbuti.DG	0.000968	1.514	6270	6191	81072
China_WLR_LN	Han_Liaoning	China_SEastAsia_Coastal_LN	Mbuti.DG	0.00125	1.549	4407	4337	56197
China_WLR_LN	Han_Liaoning	China_Miaozigou_MN	Mbuti.DG	0.001996	1.612	2129	2075	27041
China_WLR_LN	Han_Liaoning	Nepal_Samdzong_1500BP.SG	Mbuti.DG	0.001014	1.643	6876	6787	87880
China_WLR_LN	Han_Liaoning	Mongolia_EIA_Xiongnu_7	Mbuti.DG	0.001309	1.648	5289	5200	67550
China_WLR_LN	Han_Liaoning	Vietnam_BA	Mbuti.DG	0.002054	1.686	2308	2247	29594
China_WLR_LN	Han_Liaoning	Mongolia_North_N	Mbuti.DG	0.001013	1.698	6550	6465	83959
China_WLR_LN	Han_Liaoning	China_YR_MN	Mbuti.DG	0.001139	1.742	6910	6810	87516
China_WLR_LN	Han_Liaoning	Mongolia_Uvs_EIAXiongnuLateMedival	Mbuti.DG	0.000954	1.779	6549	6466	86471
China_WLR_LN	Han_Liaoning	Mongolia_Tuv_Xiongnu	Mbuti.DG	0.001472	1.969	6252	6134	79961
China_WLR_LN	Han_Liaoning	China_Upper_YR_IA	Mbuti.DG	0.001267	1.984	6711	6603	85028
China_WLR_LN	Han_Liaoning	Mongolia_Tuv_LatEMedieval	Mbuti.DG	0.001291	1.989	6251	6148	79764
China_WLR_LN	Han_Liaoning	China_Shimao_LN	Mbuti.DG	0.001321	2.001	6869	6754	87080
China_WLR_LN	Han_Liaoning	Mongolia_LBA_Khovsgol_6	Mbuti.DG	0.001032	2.01	6733	6643	86904
China_WLR_LN	Han_Liaoning	Mongolia_EIA_SlabGrave_1	Mbuti.DG	0.001144	2.095	6770	6671	86306
China_WLR_LN	Han_Liaoning	China_YR_LN	Mbuti.DG	0.001219	2.293	6928	6821	87874
China_WLR_LN	Han_Liaoning	China_AmurRiver_N	Mbuti.DG	0.001492	2.297	5644	5537	71601
China_WLR_LN	Han_Liaoning	China_Upper_YR_LN	Mbuti.DG	0.001399	2.333	6883	6761	87138
China_WLR_LN	Han_Liaoning	China_AmurRiver_Paleolithic	Mbuti.DG	0.001734	2.334	6066	5928	79354
China_WLR_LN	Han_Liaoning	Russia_MN_Boisman	Mbuti.DG	0.001466	2.362	6392	6272	81212
China_WLR_LN	Han_Liaoning	Russia_Buryatia_Xiongnu	Mbuti.DG	0.001473	2.471	6623	6498	84507
China_WLR_LN	Han_Liaoning	China_WLR_MN	Mbuti.DG	0.001804	2.541	6920	6762	87421
China_WLR_LN	Han_Liaoning	Mongolia_LBA_CenterWest_4	Mbuti.DG	0.001435	2.695	6649	6527	85028
China_WLR_LN	Han_Liaoning	Mongolia_Bulgan_Xiongnu	Mbuti.DG	0.002129	2.931	6273	6104	79643
China_WLR_LN	Han_Liaoning	Vietnam_N	Mbuti.DG	0.004693	3.714	1757	1652	22444
China_WLR_LN	Han_Liaoning	China_NEastAsia_Coastal_EN	Mbuti.DG	0.002436	3.764	6596	6394	82883

## Sheet: I
Supplementary Table 7I: The results of f4-statistics in the form of f4 (Heishui_Mohe, Han_Liaoning; Ancient population1, Mbuti) based on 1240k merged dataset
Pop1 (W)	Pop2 (X)	Pop3 (Y)	Pop4 (Z)	D-stat	Z	BABA	ABBA	SNPs
Russia_EarlyMedieval_Heshui_Mohe_1	Han_Liaoning	China_Shimao_LN	Mbuti.DG	-0.002774	-2.238	2266	2347	29462
Russia_EarlyMedieval_Heshui_Mohe_1	Han_Liaoning	China_WLR_LN	Mbuti.DG	-0.003066	-2.222	2018	2099	26297
Russia_EarlyMedieval_Heshui_Mohe_1	Han_Liaoning	China_YR_LN	Mbuti.DG	-0.00226	-2.215	2299	2366	29689
Russia_EarlyMedieval_Heshui_Mohe_1	Han_Liaoning	Nepal_Samdzong_1500BP.SG	Mbuti.DG	-0.002372	-2.117	2273	2343	29681
Russia_EarlyMedieval_Heshui_Mohe_1	Han_Liaoning	China_YR_LBIA	Mbuti.DG	-0.001636	-1.605	2295	2343	29625
Russia_EarlyMedieval_Heshui_Mohe_1	Han_Liaoning	China_Miaozigou_MN	Mbuti.DG	-0.003755	-1.581	731	767	9648
Russia_EarlyMedieval_Heshui_Mohe_1	Han_Liaoning	China_Upper_YR_LN	Mbuti.DG	-0.001749	-1.533	2282	2334	29454
Russia_EarlyMedieval_Heshui_Mohe_1	Han_Liaoning	Nepal_Mebrak_2125BP.SG	Mbuti.DG	-0.002611	-1.513	1585	1639	20579
Russia_EarlyMedieval_Heshui_Mohe_1	Han_Liaoning	Mongolia_Bulgan_Xiongnu	Mbuti.DG	-0.00188	-1.476	2191	2245	28658
Russia_EarlyMedieval_Heshui_Mohe_1	Han_Liaoning	China_Upper_YR_IA	Mbuti.DG	-0.001661	-1.4	2245	2293	28959
Russia_EarlyMedieval_Heshui_Mohe_1	Han_Liaoning	Japan_Jomon.SG	Mbuti.DG	-0.002211	-1.349	1776	1828	23441
Russia_EarlyMedieval_Heshui_Mohe_1	Han_Liaoning	Russia_Kalmykia_EBA_Yamnaya.SG	Mbuti.DG	-0.001394	-1.284	2142	2183	29329
Russia_EarlyMedieval_Heshui_Mohe_1	Han_Liaoning	Taiwan_Gongguan	Mbuti.DG	-0.002017	-1.247	1880	1930	24376
Russia_EarlyMedieval_Heshui_Mohe_1	Han_Liaoning	Taiwan_Hanben_IA	Mbuti.DG	-0.00116	-1.22	2306	2340	29685
Russia_EarlyMedieval_Heshui_Mohe_1	Han_Liaoning	China_Xinjian_IA.SG	Mbuti.DG	-0.001818	-1.188	1600	1638	21281
Russia_EarlyMedieval_Heshui_Mohe_1	Han_Liaoning	China_Tianyuan	Mbuti.DG	-0.001514	-1.054	2044	2085	27388
Russia_EarlyMedieval_Heshui_Mohe_1	Han_Liaoning	China_SEastAsia_Coastal_EN	Mbuti.DG	-0.002034	-0.993	977	1003	12911
Russia_EarlyMedieval_Heshui_Mohe_1	Han_Liaoning	Mongolia_EIA_Xiongnu_7	Mbuti.DG	-0.001331	-0.916	2084	2120	27031
Russia_EarlyMedieval_Heshui_Mohe_1	Han_Liaoning	China_YR_MN	Mbuti.DG	-0.001031	-0.89	2312	2342	29605
Russia_EarlyMedieval_Heshui_Mohe_1	Han_Liaoning	Mongolia_Tuv_Xiongnu	Mbuti.DG	-0.001165	-0.859	2213	2246	28692
Russia_EarlyMedieval_Heshui_Mohe_1	Han_Liaoning	Mongolia_North_N	Mbuti.DG	-0.000877	-0.816	2277	2303	29567
Russia_EarlyMedieval_Heshui_Mohe_1	Han_Liaoning	Russia_Andronovo.SG	Mbuti.DG	-0.000852	-0.784	2181	2206	29640
Russia_EarlyMedieval_Heshui_Mohe_1	Han_Liaoning	Nepal_Chokhopani_2800BP.SG	Mbuti.DG	-0.001031	-0.748	2291	2322	29612
Russia_EarlyMedieval_Heshui_Mohe_1	Han_Liaoning	Mongolia_Arkhangai_Xiongnu	Mbuti.DG	-0.000695	-0.71	2204	2224	29631
Russia_EarlyMedieval_Heshui_Mohe_1	Han_Liaoning	Mongolia_LBA_CenterWest_5	Mbuti.DG	-0.00082	-0.692	2216	2240	29421
Russia_EarlyMedieval_Heshui_Mohe_1	Han_Liaoning	Mongolia_LBA_MongunTaiga_3	Mbuti.DG	-0.000728	-0.688	2202	2224	29202
Russia_EarlyMedieval_Heshui_Mohe_1	Han_Liaoning	Iran_TepeAbdulHosein_N.SG	Mbuti.DG	-0.000778	-0.68	2035	2057	28096
Russia_EarlyMedieval_Heshui_Mohe_1	Han_Liaoning	China_AR_Xianbei_IA	Mbuti.DG	-0.001845	-0.675	634	649	8174
Russia_EarlyMedieval_Heshui_Mohe_1	Han_Liaoning	Iran_GanjDareh_N	Mbuti.DG	-0.000423	-0.414	2159	2172	29513
Russia_EarlyMedieval_Heshui_Mohe_1	Han_Liaoning	Mongolia_EIA_Sagly_4	Mbuti.DG	-0.000195	-0.223	2247	2253	29665
Russia_EarlyMedieval_Heshui_Mohe_1	Han_Liaoning	Vietnam_N	Mbuti.DG	-0.000244	-0.102	765	767	10016
Russia_EarlyMedieval_Heshui_Mohe_1	Han_Liaoning	Russia_Buryatia_Xiongnu	Mbuti.DG	5.6e-05	0.053	2299	2297	29491
Russia_EarlyMedieval_Heshui_Mohe_1	Han_Liaoning	Mongolia_EBA_Ulgii_1	Mbuti.DG	0.0001	0.088	2270	2267	29276
Russia_EarlyMedieval_Heshui_Mohe_1	Han_Liaoning	Russia_Afanasievo	Mbuti.DG	8.8e-05	0.096	2202	2200	29676
Russia_EarlyMedieval_Heshui_Mohe_1	Han_Liaoning	China_SEastAsia_Coastal_LN	Mbuti.DG	0.000161	0.116	1799	1796	23103
Russia_EarlyMedieval_Heshui_Mohe_1	Han_Liaoning	Russia_Samara_EBA_Yamnaya	Mbuti.DG	0.000126	0.127	2196	2192	29537
Russia_EarlyMedieval_Heshui_Mohe_1	Han_Liaoning	Russia_MLBA_Sintashta	Mbuti.DG	0.000133	0.15	2199	2195	29679
Russia_EarlyMedieval_Heshui_Mohe_1	Han_Liaoning	Russia_MN_Boisman	Mbuti.DG	0.000172	0.161	2289	2284	29352
Russia_EarlyMedieval_Heshui_Mohe_1	Han_Liaoning	Mongolia_Uvs_EIAXiongnuLateMedival	Mbuti.DG	0.000213	0.228	2236	2229	29645
Russia_EarlyMedieval_Heshui_Mohe_1	Han_Liaoning	Vietnam_BA	Mbuti.DG	0.000516	0.246	1000	993	12815
Russia_EarlyMedieval_Heshui_Mohe_1	Han_Liaoning	China_NEastAsia_Coastal_EN	Mbuti.DG	0.000277	0.25	2312	2304	29388
Russia_EarlyMedieval_Heshui_Mohe_1	Han_Liaoning	China_AR_EN	Mbuti.DG	0.000608	0.267	830	823	10600
Russia_EarlyMedieval_Heshui_Mohe_1	Han_Liaoning	China_WLR_BA	Mbuti.DG	0.000525	0.289	1388	1379	17658
Russia_EarlyMedieval_Heshui_Mohe_1	Han_Liaoning	Hungary_LateC_EBA_Baden_Yamnaya	Mbuti.DG	0.000356	0.298	2054	2044	27792
Russia_EarlyMedieval_Heshui_Mohe_1	Han_Liaoning	Mongolia_Arkhangai_XiongnuEarlyMedieval_2	Mbuti.DG	0.000458	0.379	2071	2058	27645
Russia_EarlyMedieval_Heshui_Mohe_1	Han_Liaoning	Mongolia_East_N	Mbuti.DG	0.000521	0.424	2255	2240	28932
Russia_EarlyMedieval_Heshui_Mohe_1	Han_Liaoning	Luxembourg_Loschbour.DG	Mbuti.DG	0.000566	0.439	2108	2092	28171
Russia_EarlyMedieval_Heshui_Mohe_1	Han_Liaoning	Mongolia_EIA_SlabGrave_1	Mbuti.DG	0.000421	0.44	2315	2302	29656
Russia_EarlyMedieval_Heshui_Mohe_1	Han_Liaoning	Mongolia_EIA_2	Mbuti.DG	0.000753	0.487	2029	2009	26810
Russia_EarlyMedieval_Heshui_Mohe_1	Han_Liaoning	China_AmurRiver_LPaleolithic	Mbuti.DG	0.000602	0.502	2153	2137	27659
Russia_EarlyMedieval_Heshui_Mohe_1	Han_Liaoning	China_NEastAsia_Inland_EN	Mbuti.DG	0.000854	0.558	2133	2110	27361
Russia_EarlyMedieval_Heshui_Mohe_1	Han_Liaoning	Laos_Hoabinhian.SG	Mbuti.DG	0.001331	0.572	801	787	10634
Russia_EarlyMedieval_Heshui_Mohe_1	Han_Liaoning	Mongolia_EIA_Pazyryk_6	Mbuti.DG	0.000897	0.593	2070	2046	27223
Russia_EarlyMedieval_Heshui_Mohe_1	Han_Liaoning	Mongolia_LBA_CenterWest_4	Mbuti.DG	0.000637	0.635	2301	2283	29586
Russia_EarlyMedieval_Heshui_Mohe_1	Han_Liaoning	Iran_Wezmeh_N.SG	Mbuti.DG	0.000994	0.699	2196	2167	29684
Russia_EarlyMedieval_Heshui_Mohe_1	Han_Liaoning	Russia_Alan.SG	Mbuti.DG	0.000773	0.71	2180	2157	29485
Russia_EarlyMedieval_Heshui_Mohe_1	Han_Liaoning	Mongolia_Khentii_Xiongnu	Mbuti.DG	0.001008	0.712	2214	2185	28207
Russia_EarlyMedieval_Heshui_Mohe_1	Han_Liaoning	Iran_Hasanlu_IA.SG	Mbuti.DG	0.001008	0.737	1974	1948	26491
Russia_EarlyMedieval_Heshui_Mohe_1	Han_Liaoning	Mongolia_LBA_Khovsgol_6	Mbuti.DG	0.000692	0.745	2303	2282	29665
Russia_EarlyMedieval_Heshui_Mohe_1	Han_Liaoning	Russia_DevilsCave_N.SG	Mbuti.DG	0.000935	0.797	2344	2317	29684
Russia_EarlyMedieval_Heshui_Mohe_1	Han_Liaoning	China_AmurRiver_Paleolithic	Mbuti.DG	0.001356	0.945	2223	2184	29017
Russia_EarlyMedieval_Heshui_Mohe_1	Han_Liaoning	China_AmurRiver_EarlyN	Mbuti.DG	0.001296	0.961	2088	2054	26398
Russia_EarlyMedieval_Heshui_Mohe_1	Han_Liaoning	China_AmurRiver_Mesolithic	Mbuti.DG	0.001517	1.204	2023	1985	25529
Russia_EarlyMedieval_Heshui_Mohe_1	Han_Liaoning	China_WLR_MN	Mbuti.DG	0.001544	1.216	2333	2287	29588
Russia_EarlyMedieval_Heshui_Mohe_1	Han_Liaoning	Ukraine_EBA_Yamnaya	Mbuti.DG	0.001946	1.388	2014	1961	27067
Russia_EarlyMedieval_Heshui_Mohe_1	Han_Liaoning	Russia_Caucasus_EBA_Yamnaya	Mbuti.DG	0.002014	1.516	1961	1909	25876
Russia_EarlyMedieval_Heshui_Mohe_1	Han_Liaoning	Mongolia_Tuv_LatEMedieval	Mbuti.DG	0.001732	1.528	2270	2220	28926
Russia_EarlyMedieval_Heshui_Mohe_1	Han_Liaoning	China_AmurRiver_N	Mbuti.DG	0.002141	1.888	2199	2140	27737

## Sheet: J
Supplementary Table 7J: The results of f4-statistics in the form of f4 (Russia_MN_Boisman, Han_Liaoning; Ancient population1, Mbuti) based on 1240k merged dataset
Pop1 (W)	Pop2 (X)	Pop3 (Y)	Pop4 (Z)	D-stat	Z	BABA	ABBA	SNPs
Russia_MN_Boisman	Han_Liaoning	China_Upper_YR_IA	Mbuti.DG	-0.001548	-3.469	7235	7379	92599
Russia_MN_Boisman	Han_Liaoning	China_YR_MN	Mbuti.DG	-0.001289	-2.852	7484	7607	95204
Russia_MN_Boisman	Han_Liaoning	China_YR_LN	Mbuti.DG	-0.001143	-2.846	7507	7616	95622
Russia_MN_Boisman	Han_Liaoning	China_Shimao_LN	Mbuti.DG	-0.001186	-2.481	7436	7548	94679
Russia_MN_Boisman	Han_Liaoning	Taiwan_Gongguan	Mbuti.DG	-0.001332	-2.287	5102	5189	65352
Russia_MN_Boisman	Han_Liaoning	China_YR_LBIA	Mbuti.DG	-0.000953	-2.275	7481	7572	95233
Russia_MN_Boisman	Han_Liaoning	Taiwan_Hanben_IA	Mbuti.DG	-0.000821	-2.102	7499	7577	95568
Russia_MN_Boisman	Han_Liaoning	Nepal_Chokhopani_2800BP.SG	Mbuti.DG	-0.000875	-1.642	7462	7546	95423
Russia_MN_Boisman	Han_Liaoning	China_WLR_LN	Mbuti.DG	-0.000545	-1.049	6392	6436	81212
Russia_MN_Boisman	Han_Liaoning	China_Upper_YR_LN	Mbuti.DG	-0.000437	-1.009	7478	7520	94743
Russia_MN_Boisman	Han_Liaoning	Nepal_Mebrak_2125BP.SG	Mbuti.DG	-0.000354	-0.57	5054	5077	64099
Russia_MN_Boisman	Han_Liaoning	Nepal_Samdzong_1500BP.SG	Mbuti.DG	-0.00023	-0.544	7506	7528	95602
Russia_MN_Boisman	Han_Liaoning	China_Miaozigou_MN	Mbuti.DG	-0.000471	-0.529	2267	2280	28990
Russia_MN_Boisman	Han_Liaoning	Laos_Hoabinhian.SG	Mbuti.DG	-0.000346	-0.449	2698	2711	36446
Russia_MN_Boisman	Han_Liaoning	Russia_EarlyMedieval_Heshui_Mohe_1	Mbuti.DG	-0.000302	-0.379	2289	2298	29352
Russia_MN_Boisman	Han_Liaoning	Vietnam_BA	Mbuti.DG	-0.000114	-0.151	2540	2544	32472
Russia_MN_Boisman	Han_Liaoning	Vietnam_N	Mbuti.DG	-8e-05	-0.1	1882	1884	24496
Russia_MN_Boisman	Han_Liaoning	Iran_Hasanlu_IA.SG	Mbuti.DG	-4.8e-05	-0.09	6185	6189	83356
Russia_MN_Boisman	Han_Liaoning	Russia_Alan.SG	Mbuti.DG	1.1e-05	0.026	7069	7068	94962
Russia_MN_Boisman	Han_Liaoning	China_SEastAsia_Coastal_LN	Mbuti.DG	0.000538	1.022	4910	4877	62425
Russia_MN_Boisman	Han_Liaoning	Luxembourg_Loschbour.DG	Mbuti.DG	0.000928	1.903	6827	6743	90358
Russia_MN_Boisman	Han_Liaoning	Russia_Kalmykia_EBA_Yamnaya.SG	Mbuti.DG	0.000841	1.979	6995	6916	93096
Russia_MN_Boisman	Han_Liaoning	Iran_Wezmeh_N.SG	Mbuti.DG	0.001039	2.019	7153	7053	95580
Russia_MN_Boisman	Han_Liaoning	Iran_TepeAbdulHosein_N.SG	Mbuti.DG	0.000965	2.024	6613	6527	89262
Russia_MN_Boisman	Han_Liaoning	China_SEastAsia_Coastal_EN	Mbuti.DG	0.001688	2.098	2468	2415	31243
Russia_MN_Boisman	Han_Liaoning	Mongolia_Arkhangai_XiongnuEarlyMedieval_2	Mbuti.DG	0.00102	2.14	6128	6046	80912
Russia_MN_Boisman	Han_Liaoning	Ukraine_EBA_Yamnaya	Mbuti.DG	0.001377	2.586	5692	5588	75497
Russia_MN_Boisman	Han_Liaoning	Hungary_LateC_EBA_Baden_Yamnaya	Mbuti.DG	0.001251	2.742	6060	5959	80532
Russia_MN_Boisman	Han_Liaoning	China_WLR_MN	Mbuti.DG	0.001465	2.979	7594	7454	95056
Russia_MN_Boisman	Han_Liaoning	Russia_Andronovo.SG	Mbuti.DG	0.001272	3.043	7199	7078	95194
Russia_MN_Boisman	Han_Liaoning	China_Xinjian_IA.SG	Mbuti.DG	0.001608	3.061	5255	5146	67590
Russia_MN_Boisman	Han_Liaoning	Russia_Samara_EBA_Yamnaya	Mbuti.DG	0.001271	3.09	7120	7001	93992
Russia_MN_Boisman	Han_Liaoning	China_WLR_BA	Mbuti.DG	0.002119	3.116	4290	4176	53596
Russia_MN_Boisman	Han_Liaoning	Mongolia_Tuv_Xiongnu	Mbuti.DG	0.00177	3.364	7034	6878	88433
Russia_MN_Boisman	Han_Liaoning	Mongolia_EIA_Pazyryk_6	Mbuti.DG	0.001831	3.365	5905	5765	76597
Russia_MN_Boisman	Han_Liaoning	China_AmurRiver_Paleolithic	Mbuti.DG	0.001778	3.368	6847	6689	88674
Russia_MN_Boisman	Han_Liaoning	Japan_Jomon.SG	Mbuti.DG	0.002241	3.816	5912	5744	75061
Russia_MN_Boisman	Han_Liaoning	Iran_GanjDareh_N	Mbuti.DG	0.0017	3.896	6967	6809	92965
Russia_MN_Boisman	Han_Liaoning	Mongolia_Bulgan_Xiongnu	Mbuti.DG	0.002	4.063	6996	6820	87894
Russia_MN_Boisman	Han_Liaoning	Mongolia_EIA_2	Mbuti.DG	0.002176	4.084	5800	5636	75047
Russia_MN_Boisman	Han_Liaoning	Russia_Caucasus_EBA_Yamnaya	Mbuti.DG	0.00196	4.112	5404	5265	70902
Russia_MN_Boisman	Han_Liaoning	Russia_MLBA_Sintashta	Mbuti.DG	0.001577	4.366	7225	7074	95431
Russia_MN_Boisman	Han_Liaoning	Mongolia_LBA_CenterWest_5	Mbuti.DG	0.002146	4.539	7149	6950	92319
Russia_MN_Boisman	Han_Liaoning	Mongolia_LBA_MongunTaiga_3	Mbuti.DG	0.002104	4.605	6996	6806	89978
Russia_MN_Boisman	Han_Liaoning	Russia_Afanasievo	Mbuti.DG	0.001802	4.689	7251	7079	95356
Russia_MN_Boisman	Han_Liaoning	China_NEastAsia_Coastal_EN	Mbuti.DG	0.002083	4.783	7389	7197	92015
Russia_MN_Boisman	Han_Liaoning	China_Tianyuan	Mbuti.DG	0.002664	4.864	6241	6027	80463
Russia_MN_Boisman	Han_Liaoning	Mongolia_Arkhangai_Xiongnu	Mbuti.DG	0.001989	4.982	7276	7088	94585
Russia_MN_Boisman	Han_Liaoning	Mongolia_Uvs_EIAXiongnuLateMedival	Mbuti.DG	0.002305	6.15	7342	7124	94875
Russia_MN_Boisman	Han_Liaoning	China_NEastAsia_Inland_EN	Mbuti.DG	0.003947	6.708	6388	6076	79042
Russia_MN_Boisman	Han_Liaoning	China_AR_Xianbei_IA	Mbuti.DG	0.00685	6.915	2054	1884	24823
Russia_MN_Boisman	Han_Liaoning	Mongolia_EIA_Xiongnu_7	Mbuti.DG	0.003702	6.995	6093	5812	75695
Russia_MN_Boisman	Han_Liaoning	China_AR_EN	Mbuti.DG	0.00578	7.083	2600	2416	31833
Russia_MN_Boisman	Han_Liaoning	Mongolia_Tuv_LatEMedieval	Mbuti.DG	0.003659	7.849	7151	6827	88568
Russia_MN_Boisman	Han_Liaoning	Mongolia_EIA_Sagly_4	Mbuti.DG	0.002983	8.222	7444	7160	95149
Russia_MN_Boisman	Han_Liaoning	Mongolia_EBA_Ulgii_1	Mbuti.DG	0.003794	8.658	7232	6889	90556
Russia_MN_Boisman	Han_Liaoning	Mongolia_Khentii_Xiongnu	Mbuti.DG	0.005612	9.252	6892	6422	83908
Russia_MN_Boisman	Han_Liaoning	Mongolia_LBA_CenterWest_4	Mbuti.DG	0.003814	9.657	7569	7210	94113
Russia_MN_Boisman	Han_Liaoning	Mongolia_LBA_Khovsgol_6	Mbuti.DG	0.0037	9.975	7616	7264	95266
Russia_MN_Boisman	Han_Liaoning	Russia_Buryatia_Xiongnu	Mbuti.DG	0.004397	10.153	7535	7126	93142
Russia_MN_Boisman	Han_Liaoning	Mongolia_East_N	Mbuti.DG	0.005747	11.407	7248	6740	88421
Russia_MN_Boisman	Han_Liaoning	Mongolia_EIA_SlabGrave_1	Mbuti.DG	0.004603	11.944	7724	7287	94976
Russia_MN_Boisman	Han_Liaoning	Mongolia_North_N	Mbuti.DG	0.005478	12.798	7613	7102	93302
Russia_MN_Boisman	Han_Liaoning	China_AmurRiver_LPaleolithic	Mbuti.DG	0.006194	13.003	6659	6159	80821
Russia_MN_Boisman	Han_Liaoning	China_AmurRiver_EarlyN	Mbuti.DG	0.008247	15.053	6136	5532	73278
Russia_MN_Boisman	Han_Liaoning	China_AmurRiver_Mesolithic	Mbuti.DG	0.008801	16.615	5833	5223	69347
Russia_MN_Boisman	Han_Liaoning	China_AmurRiver_N	Mbuti.DG	0.009052	19.041	6732	6008	80067
Russia_MN_Boisman	Han_Liaoning	Russia_DevilsCave_N.SG	Mbuti.DG	0.010039	21.292	8091	7131	95605

[truncated: 10 more sheets: K, L, M, N, O, P, Q, R, S, T]
