# Supplementary material for: Genetic structure and demographic history of Northern Han people in Liaoning Province inferred from genome-wide array data
Source: Frontiers journal article supplement (doi:10.3389/fevo.2022.1014024), 2022-11-03
Supplement: Table_9.XLSX [file Table_9.XLSX]

## Sheet: A
Supplementary Table 9A: Two-way admixture model between different Han population based on “Merged-HO” dataset
	Han_Liaoning		Manchu_Liaoning		Mongolian_Liaoning		Han_Henan		Han_Shandong		Han_Shanxi		Han_Jiangsu		Han_Hubei		Han_Zhejiang		Han_Shanghai		Han_Sichuan		Han_Chongqing		Han_Fujian		Han_Guangdong
	Anceatral proportion	SE	Anceatral proportion	SE	Anceatral proportion	SE	Anceatral proportion	SE	Anceatral proportion	SE	Anceatral proportion	SE	Anceatral proportion	SE	Anceatral proportion	SE	Anceatral proportion	SE	Anceatral proportion	SE	Anceatral proportion	SE	Anceatral proportion	SE	Anceatral proportion	SE	Anceatral proportion	SE
Taiwan_Hanben_IA	0.339	0.051	0.328	0.053	0.203	0.062	0.341	0.059	0.289	0.059	0.3	0.059	0.445	0.051	0.485	0.052	0.452	0.052	0.436	0.065	0.454	0.053	0.462	0.058	0.544	0.047	0.573	0.047
China_WLR_MN	0.661	0.051	0.672	0.053	0.797	0.062	0.659	0.059	0.711	0.059	0.7	0.059	0.555	0.051	0.515	0.052	0.548	0.052	0.564	0.065	0.546	0.053	0.538	0.058	0.456	0.047	0.427	0.047
Taiwan_Hanben_IA	0.196	0.059	0.177	0.06	-	-	0.201	0.067	0.145	0.063	0.147	0.068	0.329	0.065	0.38	0.064	0.343	0.067	0.343	0.078	0.347	0.061	0.359	0.065	0.454	0.06	0.489	0.059
China_Upper_YR_LN	0.804	0.059	0.823	0.06	-	-	0.799	0.067	0.855	0.063	0.853	0.068	0.671	0.065	0.62	0.064	0.657	0.067	0.657	0.078	0.653	0.061	0.641	0.065	0.546	0.06	0.511	0.059
Taiwan_Hanben_IA	0.397	0.039	0.387	0.04	0.269	0.046	0.398	0.048	0.35	0.046	0.357	0.049	0.495	0.042	0.536	0.044	0.503	0.044	0.498	0.055	0.507	0.042	0.531	0.049	0.583	0.041	0.61	0.037
Mongolia_East_N	0.603	0.039	0.613	0.04	0.731	0.046	0.602	0.048	0.65	0.046	0.643	0.049	0.505	0.042	0.464	0.044	0.497	0.044	0.502	0.055	0.493	0.042	0.469	0.049	0.417	0.041	0.39	0.037
Taiwan_Hanben_IA	0.317	0.046	0.304	0.046	0.166	0.056	0.321	0.055	0.262	0.053	0.276	0.054	0.429	0.047	0.466	0.046	0.44	0.049	0.414	0.061	0.449	0.048	0.46	0.054	0.537	0.047	0.578	0.041
Russia_DevilsCave_N.SG	0.683	0.046	0.696	0.046	0.834	0.056	0.679	0.055	0.738	0.053	0.724	0.054	0.571	0.047	0.534	0.046	0.56	0.049	0.586	0.061	0.551	0.048	0.54	0.054	0.463	0.047	0.422	0.041

## Sheet: B
Supplementary Table 9B: Two-way admixture model between Liaoning Han and other northern populations based on “Merged-1240K” dataset
	Han_Liaoning		Manchu_Liaoning		Mongolian_Liaoning		Han.DG		Mongola.DG		Daur.DG		Oroqen.DG		Hezhen.DG		Xibo.DG
	Anceatral proportion	SE	Anceatral proportion	SE	Anceatral proportion	SE	Anceatral proportion	SE	Anceatral proportion	SE	Anceatral proportion	SE	Anceatral proportion	SE	Anceatral proportion	SE	Anceatral proportion	SE
China_YR_MN	0.979	0.017	0.978	0.017	0.917	0.016	-	-	0.917	0.02	0.869	0.026	0.884	0.023	0.885	0.022	0.862	0.021
Russia_Afanasievo	0.021	0.017	0.022	0.017	0.083	0.016	-	-	0.083	0.02	0.131	0.026	0.116	0.023	0.115	0.022	0.138	0.021
Mongolia_East_N	0.613	0.029	0.617	0.029	0.748	0.033	0.505	0.034	0.778	0.045	0.921	0.063	-	-	0.906	0.051	0.82	0.049
Taiwan_Hanben_IA	0.387	0.029	0.383	0.029	0.252	0.033	0.495	0.034	0.222	0.045	0.079	0.063	-	-	0.094	0.051	0.18	0.049
Russia_DevilsCave_N.SG	0.7	0.035	0.709	0.035	0.861	0.043	0.572	0.041	0.886	0.055	-	-	-	-	-	-	-	-
Taiwan_Hanben_IA	0.3	0.035	0.291	0.035	0.139	0.043	0.428	0.041	0.114	0.055	-	-	-	-	-	-	-	-
China_WLR_MN	0.736	0.043	0.743	0.043	0.895	0.051	0.594	0.046	0.913	0.061	-	-	-	-	-	-	-	-
Taiwan_Hanben_IA	0.264	0.043	0.257	0.043	0.105	0.051	0.406	0.046	0.087	0.061	-	-	-	-	-	-	-	-
China_Upper_YR_LN	0.828	0.038	0.841	0.04	-	-	0.671	0.049	-	-	-	-	-	-	-	-	0.954	0.023
Taiwan_Hanben_IA	0.172	0.038	0.159	0.04	-	-	0.329	0.049	-	-	-	-	-	-	-	-	0.046	0.023

## Sheet: C
Supplementary Table 9C: Two-way admixture model among Liaoning Han based on “Merged-1240K” dataset
	Han_Dandong		Han_Dalian		Han_Shenyang		Han_Panjin
	Anceatral proportion	SE	Anceatral proportion	SE	Anceatral proportion	SE	Anceatral proportion	SE
China_YR_MN	0.983	0.017	0.983	0.017	0.976	0.017	0.972	0.017
Russia_Afanasievo	0.017	0.017	0.017	0.017	0.024	0.017	0.028	0.017
Mongolia_East_N	0.611	0.03	0.593	0.029	0.624	0.03	0.619	0.03
Taiwan_Hanben_IA	0.389	0.03	0.407	0.029	0.376	0.03	0.381	0.03
Russia_DevilsCave_N.SG	0.7	0.036	0.678	0.036	0.713	0.036	0.703	0.038
Taiwan_Hanben_IA	0.3	0.036	0.322	0.036	0.287	0.036	0.297	0.038
China_WLR_MN	0.731	0.043	0.713	0.043	0.752	0.045	0.742	0.045
Taiwan_Hanben_IA	0.369	0.043	0.287	0.043	0.248	0.045	0.258	0.045
China_Upper_YR_LN	0.823	0.04	0.807	0.039	0.832	0.041	0.835	0.04
Taiwan_Hanben_IA	0.177	0.04	0.193	0.039	0.168	0.041	0.165	0.04
Heshui_Mohe	0.847	0.115	0.815	0.108	0.864	0.116	0.847	0.111
Taiwan_Hanben_IA	0.153	0.115	0.185	0.108	0.136	0.116	0.153	0.111
