# Supplementary material for: Genetic structure and demographic history of Northern Han people in Liaoning Province inferred from genome-wide array data
Source: Frontiers journal article supplement (doi:10.3389/fevo.2022.1014024), 2022-11-03
Supplement: Table_10.XLSX [file Table_10.XLSX]

## Sheet: Sheet1
Supplematary Table 10 . Admixture date and source of Mongolian_Fuxin based on Human Origin dataset
Test pop	ref A	ref B	2-ref z-score	2-ref decay	p-value
Han_Liaoning	Iranian	Maonan	2	48.58 +/- 24.34	0.046
Han_Liaoning	Maonan	Tajik	2.01	56.96 +/- 24.74	0.044
Han_Liaoning	Buryat	Iranian	2.09	43.03 +/- 20.57	0.036
Han_Liaoning	Buryat	Uzbek	2.13	58.50 +/- 21.80	0.033
Han_Liaoning	Buryat	Turkish	2.18	59.95 +/- 27.47	0.029
Han_Liaoning	Spanish	Yakut	2.21	150.83 +/- 48.74	0.027
Han_Liaoning	She	Uyghur	2.22	60.80 +/- 12.15	0.026
Han_Liaoning	French	Yakut	2.23	138.05 +/- 40.37	0.026
Han_Liaoning	Kazakh	She	2.24	68.73 +/- 14.70	0.025
Han_Liaoning	Kazakh_China	She	2.27	46.12 +/- 14.92	0.023
Han_Liaoning	Maonan	Turkish	2.28	37.01 +/- 16.21	0.022
Han_Liaoning	French	Maonan	2.3	55.27 +/- 23.95	0.021
Han_Liaoning	Maonan	Russian	2.34	63.49 +/- 25.65	0.019
Han_Liaoning	Russian	Uzbek	2.46	122.22 +/- 23.08	0.014
Han_Liaoning	Buryat	English	2.49	83.40 +/- 26.81	0.013
Han_Liaoning	Russian	Yakut	2.57	138.33 +/- 37.74	0.01
Han_Liaoning	Iranian	Yakut	2.58	141.24 +/- 54.49	0.0099
Han_Liaoning	French	Kazakh	2.64	123.11 +/- 34.43	0.0082
Han_Liaoning	Kazakh	Turkish	2.82	108.24 +/- 38.39	0.0048
Han_Liaoning	Tajik	Yakut	2.9	100.38 +/- 31.36	0.0038
Han_Liaoning	Buryat	Spanish	2.93	85.93 +/- 28.89	0.0034
Han_Liaoning	Kazakh	Russian	3.03	116.78 +/- 27.98	0.0025
Han_Liaoning	Buryat	Tajik	3.06	60.04 +/- 19.63	0.0022
Han_Liaoning	English	She	3.08	58.46 +/- 17.22	0.0021
Han_Liaoning	Kazakh	Spanish	3.08	111.74 +/- 27.31	0.0021
Han_Liaoning	Iranian	She	3.2	39.29 +/- 11.06	0.0014
Han_Liaoning	She	Tajik	3.21	41.49 +/- 8.52	0.0013
Han_Liaoning	Buryat	French	3.34	79.21 +/- 22.85	0.00085
Han_Liaoning	Buryat	Russian	3.41	80.84 +/- 23.74	0.00066
Han_Liaoning	Turkish	Yakut	3.52	106.51 +/- 27.56	0.00043
Han_Liaoning	Russian	She	3.77	53.32 +/- 10.64	0.00016
Han_Liaoning	She	Spanish	3.79	41.41 +/- 10.92	0.00015
Han_Liaoning	French	She	4.13	46.59 +/- 10.54	3.7e-05
Han_Liaoning	She	Turkish	4.16	42.38 +/- 10.18	3.1e-05
