# Supplementary material for: Genetic structure and demographic history of Northern Han people in Liaoning Province inferred from genome-wide array data
Source: Frontiers journal article supplement (doi:10.3389/fevo.2022.1014024), 2022-11-03
Supplement: Table_11.XLSX [file Table_11.XLSX]

## Sheet: A
Supplementary Table 11A. Y chromosome lineages and mtDNA lineages of Mongolians.
A.The number of Y and mt DNA haplotype of Mongolians.
mtDNA	number		Y	number
A	1		C2b1a1b1a	1
A14	1		C2c1a1	1
A15	2		C2c1a2a2	3
B4b1a2e	1		N1a2a1a2~	1
B4c1a	1		N1a2b1	1
B4c1b2c	1		O1a1a1a1a1a1c1	1
B4d1'2'3	1		O1a1a1a1a2	1
B4d1a	1		O1a1a2	1
B4d3	1		O1a1b~	1
B5a2a1	1		O1b1a1a1a1b1a1	1
B5b2a	1		O1b1a2a1	4
B5b2a1	1		O1b1a2c	1
C4a1	1		O2a1a1a1a1a	1
C7a	1		O2a1c1a1a1a1e1	1
D1	1		O2a1c1a1a1a1h1	1
D4	3		O2a1c1a1a1a1i	1
D4a	1		O2a2a1a1	2
D4a1e	2		O2a2b1a1a	1
D4b1	1		O2a2b1a1a1a1	2
D4b1a1	1		O2a2b1a1a1a1a1	1
D4b2a2a1	1		O2a2b1a1a1a3	1
D4b2b	1		O2a2b1a1a2a	1
D4b2b2b	1		O2a2b1a1a6	1
D4g2a1	2		O2a2b1a2a1a1	1
D4i	3		O2a2b1a2a1a2	2
D4q	3		O2a2b1a2a1a3	1
D4t	1		O2a2b1a2a1a3b2b2	1
D5a2a	4		O2a2b1a2a1d1	1
D5b1	1		O2a2b2a2b	1
D5c1a	1		O2b1a	1
F1	1		R1a1a1b2	1
F1a	1		R1a1a1b2a2	1
F1a1c	2
F1a1c3	1
F2	1
F2c1	1
F2e	1
G1a1	1
G1c	1
G2a	1
G2a5	2
M10a1a1	1
M10a1a1a	1
M11	1
M11a2	1
M7b1a1	1
M7b1b	2
M7c1a3	1
M7c1c	1
M8a	1
M9a1a	1
M9a1a1c1a	2
N9a	1
N9a1	2
N9a10	1
R11b	1
U2e1b	1
Z3	2
Z3c	1
Z4	2
Z4a	1

## Sheet: B
Supplementary Table 11B. The detailed information of mtDNA and Y lineage.
Gourpname	mtDNA	end_node_snp	Y	end_node_snp
1ST22010100001	Z3	['10208']	C2c1a2a2	['7693334 F9935', '8185543 F10056', '15387471 F11686', '17510109 F12250', '21945561 F13079']
1ST22010100002	M8a	['16319', '14470', '6179', '8684']	O1a1a1a1a1a1c1	['9842441 Y31261', '13832225 Y31262', '16276404 Y31643', '22044416 Y31264', '23581321 Y31265']
1ST22010100003	Z3c	['4853']	O2a2b1a2a1a2	['14173991 F242', '16932715 CTS6493', '19371700 CTS10286', '19436515 CTS10401', '21127074 F563', '22821767 CTS10888', '23024318 F634', '23136102 CTS11492']
1ST22010100004	F1a	['16172']	NA	NA
1ST22010100005	N9a	['150', '12358', '12372', '16257']	C2c1a1	['8155906 Y12943', '9105097 F3755', '14408338 CTS2657', '21425000 Y12945']
1ST22010100006	B4c1b2c	['11440', '9128']	NA	NA
1ST22010100007	D4j	['11696']	O1a1a1a1a2	['7802126 MF1076', '16196841 MF1079', '16667575 MF1080', '19093969 MF1081']
1ST22010100008	U2e1b	['16256', '988']	NA	NA
1ST22010100009	M7c1c	['15236', '3606']	NA	NA
1ST22010100010	D5a2a	['16266']	NA	NA
1ST22010100011	F1a1c	['10211']	NA	NA
1ST22010100012	F1a1c	['10211']	NA	NA
1ST22010100013	F2c1	['11150']	O2a2b1a1a1a1	['7322814 CTS1304', '7415401 F6227', '9485180 F201', '14180280 F6872', '14322106 F254', '14387319 F6909', '14472051 CTS2760', '14995637 Y21366', '14999475 F276', '15217436 F14445', '15970952 F316', '17533033 F414', '17850565 F440', '19406133 F541', '21305159 F7447', '21354987 F703', '23145760 F7973', '23279660 F7994']
1ST22010100014	D4	['3010', '14668', '8414']	NA	NA
1ST22010100015	F2	['13708', '7828', '10586', '12338', '1005', '10535']	NA	NA
1ST22010100016	D4q	['200', '16256', '16311']	O1b1a2a1	['14323338 F1759', '15989850 F2064', '17985530 CTS8414', '21162764 Z24393', '22550485 F3314', '22587335 F3323', '22698467 F3346', '23122059 Z24407', '23334965 CTS11890', '23573679 F3478']
1ST22010100017	B5b2a1	['204']	O1b1a2a1	['14323338 F1759', '15989850 F2064', '17985530 CTS8414', '21162764 Z24393', '22550485 F3314', '22587335 F3323', '22698467 F3346', '23122059 Z24407', '23334965 CTS11890', '23573679 F3478']
1ST22010100018	N9a1	['12007', '16111', '4386']	R1a1a1b2	['7552356 S202']
1ST22010100019	D4g2a1	['11059']	O1b1a2a1	['14323338 F1759', '15989850 F2064', '17985530 CTS8414', '21162764 Z24393', '22550485 F3314', '22587335 F3323', '22698467 F3346', '23122059 Z24407', '23334965 CTS11890', '23573679 F3478']
1ST22010100020	B4d1'2'3	['15930']	NA	NA
1ST22010100021	D4j	['11696']	O2a1c1a1a1a1e1	['8205381 Y15976', '23133271 Y15980']
1ST22010100022	M11	['9950', '7642', '11969', '6531']	O2a2b1a2a1a2	['14173991 F242', '19371700 CTS10286', '19436515 CTS10401', '21127074 F563', '22821767 CTS10888', '23024318 F634', '23136102 CTS11492']
1ST22010100023	C7a	['7853']	C2c1a2a2	['7009456 F7965', '7693334 F9935', '8185543 F10056', '15387471 F11686', '17510109 F12250', '21945561 F13079']
1ST22010100024	M7c1a3	['16319']	O2a2a1a1	['2805744 CTS201']
1ST22010100025	D4t	['263']	O2a2b1a1a2a	['14849761 F692', '15929506 F310', '23968883 F666']
1ST22010100026	M9a1a1c1a	['7861']	O2a2b1a1a6	['14002211 CTS1642', '15755749 CTS4658']
1ST22010100027	D4g2a1	['11059']	O1b1a1a1a1b1a1	['7843210 Y14251', '7926414 Y13996', '8798524 Z23853', '17018656 Y14013', '17444848 Z23858', '18414585 Z23860', '18729756 Z23861', '23140567 Z23866', '23547020 Z23845', '24420336 FGC19713']
1ST22010100028	Z4	['15475']	O2a2b1a2a1a3	['15172597 CTS3776', '18889696 F2887']
1ST22010100029	D5a2a	['16266']	NA	NA
1ST22010100030	F1	['12882', '6962', '10609']	O2a1c1a1a1a1h1	['14987266 CTS3518']
1ST22010100031	G1c	['9966']	O2a2b1a1a1a3	['8623626 Z25907']
1ST22010100032	D4b2a2a1	['199']	N1a2a1a2~	['7355968 CTS1350']
1ST22010100033	M9a1a1c1a	['7861']	NA	NA
1ST22010100034	A	['16319', '16290', '4824', '235', '4248', '663']	NA	NA
1ST22010100035	A15	['263', '14067']	NA	NA
1ST22010100036	D4b2b2b	['16172', '16223']	NA	NA
1ST22010100037	D5a2a	['16266']	NA	NA
1ST22010100038	G2a5	['16234', '14861', '13383', '15562']	NA	NA
1ST22010100039	M7b1a1	['150', '12811']	NA	NA
1ST22010100040	N9a1	['12007', '16111', '4386']	NA	NA
1ST22010100041	B4d3	['546', '197', '9120']	NA	NA
1ST22010100042	Z3	['10208']	O2a2b1a2a1a3b2b2	['6696037 CTS335', '6844565 CTS558', '14173814 CTS2080.2', '14540878 CTS2882', '16282694 CTS5450', '17760269 CTS7951', '22818849 CTS10883']
1ST22010100043	D4b1a1	['152', '15217', '13827', '2246', '14091']	O2a1a1a1a1a	['7078512 Z43961']
1ST22010100044	M10a1a1	['16093']	O1a1b~	['18992733 F2911']
1ST22010100045	Z4a	['16302']	O2a1c1a1a1a1i	['8571217 SK1695', '17842545 SK1696']
1ST22010100047	C4a1	['16093', '15968']	O2a2b1a1a1a1	['14995637 Y21366', '15970952 F316', '17533033 F414']
1ST22010100048	M10a1a1a	['7948', '3083']	O2a2b2a2b	['2751928 B451', '7222529 AM01859', '7655967 F16102', '8291889 F16868', '14103399 AM01750', '15197807 AM01759', '15411865 AM01760', '15460449 AM01762', '15998443 AM01771', '16190694 AM01775', '16911211 SK1786', '17270762 AM01786', '17334362 AM01787', '17664477 AM01794', '19436508 AM01812', '19482370 AM01813', '19558212 AM01815', '21812354 AM01824', '22755456 AM01835', '23068518 AM01838']
1ST22010100049	D4q	['200', '16256', '16311']	N1a2b1	['21448794 Z35082']
1ST22010100050	A15	['263', '14067']	O1b1a2c	['19196897 CTS9996']
1ST22010100051	B4d1a	['12732']	O1a1a2	['2692201 CTS52', '7674153 F4084', '16529697 CTS5880']
1ST22010100052	B5a2a1	['12234']	NA	NA
1ST22010100053	D5b1	['6253']	NA	NA
1ST22010100054	D1	['16325']	NA	NA
1ST22010100055	M9a1a	['16316']	NA	NA
1ST22010100056	N9a10	['12771']	NA	NA
1ST22010100057	M7b1b	['16179', '14053', '16362', '958', '12358', '14314', '16152']	NA	NA
1ST22010100058	D5c1a	['16223', '182', '217']	NA	NA
1ST22010100059	G2a	['16278', '9377', '7600']	NA	NA
1ST22010100060	G1a1	['16325', '15860']	NA	NA
1ST22010100061	D4i	['16294']	NA	NA
1ST22010100066	D4	['3010', '14668', '8414']	NA	NA
1ST22010100067	D4a	['152', '8473', '3206', '14979']	NA	NA
1ST22010100068	R11b	['13269']	NA	NA
1ST22010100069	G2a5	['14861', '13383', '15562']	O2b1a	['6846802 F837', '14336908 F1770', '16718236 F2244', '16733921 F2247', '22676898 F3338']
1ST22010100070	B4c1a	['10310']	NA	NA
1ST22010100071	A14	['735']	NA	NA
1ST22010100072	F2e	['3010']	O2a2a1a1	['2805744 CTS201']
1ST22010100073	M11a2	['146']	O2a2b1a1a1a1a1	['8799343 Y20928']
1ST22010100074	B5b2a	['131']	O2a2b1a2a1d1	['2812261 F735', '7828532 Y30499', '16041510 Y30471', '23387296 Y29836']
1ST22010100075	Z4	['15475']	C2c1a2a2	['7009456 F7965', '7693334 F9935', '8185543 F10056', '15387471 F11686', '17510109 F12250', '21945561 F13079']
1ST22010100076	D4q	['200', '16256', '16311']	NA	NA
1ST22010100077	D4b1	['16319', '15951', '15440', '10181']	NA	NA
1ST22010100078	D4a1e	['16256']	O1b1a2a1	['14323338 F1759', '15989850 F2064', '17985530 CTS8414', '21162764 Z24393', '22550485 F3314', '22587335 F3323', '22698467 F3346', '23122059 Z24407', '23334965 CTS11890', '23573679 F3478']
1ST22010100079	D4a1e	['7364', '16256']	NA	NA
1ST22010100080	D4b2b	['194']	C2b1a1b1a	['2819402 F3830']
1ST22010100081	B4b1a2e	['1452']	O2a2b1a2a1a1	['6896196 F48', '7143752 CTS1011', '8725496 F163', '14982714 F275', '15237083 CTS3871', '19137297 F523', '21310190 F575']
1ST22010100082	M7b1b	['16179', '14053', '16362', '958', '12358', '14314']	R1a1a1b2a2	['4521678 Z2124']
1ST22010100083	F1a1c3	['2706']	O2a2b1a1a	['2800495 F8', '6840710 F42']
1ST22010100084	D5a2a	['16266']	NA	NA
1ST22010100085	D4	['3010', '14668', '8414']	NA	NA
